# Supplementary material for: Transcriptome and Network Changes in Climbers at Extreme Altitudes
Source: PLoS One. 2012 Feb 29;7(2):e31645. doi: 10.1371/journal.pone.0031645 (PMC3290542; doi:10.1371/journal.pone.0031645)
Supplement: Table S3 — GO/KEGG enriched in down-regulated genes (FDR< = 0.1, 343 genes). (XLS) [file pone.0031645.s011.xls]

## Sheet: Sheet1
Supplementary table 3 | GO/KEGG enriched in down-regulated genes (FDR<=0.1, 343 genes)
GO/KEGG term	P-value	Fold change	Gene IDs	Gene symbols
GO:0003735|structural constituent of ribosome	3.86399e-14	10.4214	6154,6155,6157,84545,11224,6203,6208,6143,6141,64981,6218,6133,6136,65008,6223,9045,6125,6124,6169,6168,6160,6166,6189	RPL26,RPL27,RPL27A,MRPL43,RPL35,RPS9,RPS14,RPL19,RPL18,MRPL34,RPS17,RPL9,RPL12,MRPL1,RPS19,RPL14,RPL5,RPL4,RPL38,RPL37A,RPL31,RPL36AL,RPS3A
GO:0006414|translational elongation	7.71735e-14	13.516	6154,6155,6157,11224,6203,6208,6143,6141,6218,6133,6136,6223,9045,6125,6124,6169,6168,6160,6189	RPL26,RPL27,RPL27A,RPL35,RPS9,RPS14,RPL19,RPL18,RPS17,RPL9,RPL12,RPS19,RPL14,RPL5,RPL4,RPL38,RPL37A,RPL31,RPS3A
GO:0005840|ribosome	1.08011e-13	8.89214	6154,6155,6157,84545,11224,6203,6208,6143,6141,64981,28957,6218,6133,6136,65008,6223,9045,6125,6124,6169,6168,6160,6166,6189	RPL26,RPL27,RPL27A,MRPL43,RPL35,RPS9,RPS14,RPL19,RPL18,MRPL34,MRPS28,RPS17,RPL9,RPL12,MRPL1,RPS19,RPL14,RPL5,RPL4,RPL38,RPL37A,RPL31,RPL36AL,RPS3A
GO:0033279|ribosomal subunit	2.1654e-11	10.5824	6154,6157,11224,6203,6208,6143,6141,64981,28957,6218,65008,6223,9045,6125,6124,6169,6160,6189	RPL26,RPL27A,RPL35,RPS9,RPS14,RPL19,RPL18,MRPL34,MRPS28,RPS17,MRPL1,RPS19,RPL14,RPL5,RPL4,RPL38,RPL31,RPS3A
GO:0015934|large ribosomal subunit	8.76023e-09	13.7685	6154,6157,11224,6143,6141,64981,65008,9045,6125,6124,6169,6160	RPL26,RPL27A,RPL35,RPL19,RPL18,MRPL34,MRPL1,RPL14,RPL5,RPL4,RPL38,RPL31
GO:0022625|cytosolic large ribosomal subunit	8.76023e-09	19.7603	6154,6157,11224,6143,6141,9045,6125,6124,6169,6160	RPL26,RPL27A,RPL35,RPL19,RPL18,RPL14,RPL5,RPL4,RPL38,RPL31
GO:0044445|cytosolic part	3.49031e-07	7.25889	6154,6157,11224,6203,6208,6143,6141,6218,6223,9045,6125,6124,6169,6160,6189	RPL26,RPL27A,RPL35,RPS9,RPS14,RPL19,RPL18,RPS17,RPS19,RPL14,RPL5,RPL4,RPL38,RPL31,RPS3A
GO:0034645|cellular macromolecule biosynthetic process	1.72177e-06	3.24827	6154,6155,6157,286826,84545,11224,6203,6208,10849,4666,56953,6143,6141,64981,6218,6133,6136,65008,5610,2069,6223,9045,6125,6124,1854,6169,6168,6160,6166,6189	RPL26,RPL27,RPL27A,LIN9,MRPL43,RPL35,RPS9,RPS14,CD3EAP,NACA,NT5M,RPL19,RPL18,MRPL34,RPS17,RPL9,RPL12,MRPL1,EIF2AK2,EREG,RPS19,RPL14,RPL5,RPL4,DUT,RPL38,RPL37A,RPL31,RPL36AL,RPS3A
GO:0009059|macromolecule biosynthetic process	4.43121e-06	3.09741	6154,6155,6157,286826,84545,11224,6203,6208,10849,4666,56953,6143,6141,64981,6218,6133,6136,65008,5610,2069,6223,9045,6125,6124,1854,6169,6168,6160,6166,6189	RPL26,RPL27,RPL27A,LIN9,MRPL43,RPL35,RPS9,RPS14,CD3EAP,NACA,NT5M,RPL19,RPL18,MRPL34,RPS17,RPL9,RPL12,MRPL1,EIF2AK2,EREG,RPS19,RPL14,RPL5,RPL4,DUT,RPL38,RPL37A,RPL31,RPL36AL,RPS3A
GO:0005198|structural molecule activity	1.22554e-05	3.17471	6154,6155,6157,84545,11224,6203,6208,51807,6143,6141,64981,6218,6133,6136,7060,65008,6223,9045,6125,6124,6169,6168,6160,6166,7169,6189,10174	RPL26,RPL27,RPL27A,MRPL43,RPL35,RPS9,RPS14,TUBA8,RPL19,RPL18,MRPL34,RPS17,RPL9,RPL12,THBS4,MRPL1,RPS19,RPL14,RPL5,RPL4,RPL38,RPL37A,RPL31,RPL36AL,TPM2,RPS3A,SORBS3
GO:0030529|ribonucleoprotein complex	1.45226e-05	3.42829	6154,6155,6157,84545,11224,6203,6208,6143,6141,64981,28957,6218,6133,6136,65008,6223,9045,6125,6124,6169,6168,6160,6166,6189	RPL26,RPL27,RPL27A,MRPL43,RPL35,RPS9,RPS14,RPL19,RPL18,MRPL34,MRPS28,RPS17,RPL9,RPL12,MRPL1,RPS19,RPL14,RPL5,RPL4,RPL38,RPL37A,RPL31,RPL36AL,RPS3A
GO:0005622|intracellular	0.000406326	1.8955	6154,6155,6157,6650,11132,57573,10147,54552,10794,11224,858,6203,6208,79862,84159,7691,79230,6143,6141,162966,162967,64981,6218,55200,6133,1267,653121,65008,23567,5610,57677,147657,6223,9045,146857,6125,6124,1073,8225,114991,29997,285676,199777,6169,6168,6160,6166,399669,6189,79648,51545	RPL26,RPL27,RPL27A,SOLH,CAPN10,ZNF471,SFRS14,GNL3L,ZNF460,RPL35,CAV2,RPS9,RPS14,ZNF669,ARID5B,ZNF132,ZNF557,RPL19,RPL18,ZNF600,ZNF320,MRPL34,RPS17,PLEKHG6,RPL9,CNP,ZBTB8A,MRPL1,ZNF346,EIF2AK2,ZFP14,ZNF480,RPS19,RPL14,SLFN13,RPL5,RPL4,CFL2,GTPBP6,ZNF618,GLTSCR2,ZNF454,ZNF626,RPL38,RPL37A,RPL31,RPL36AL,ZNF321,RPS3A,MCPH1,ZNF581
GO:0005829|cytosol	0.000474698	2.14882	6154,6155,6157,11132,5577,11224,858,6203,6208,8718,1830,6718,6143,6141,6218,6133,6136,8436,3002,8666,51559,6223,9045,353,6125,6124,5478,6647,54751,5901,10380,1854,2176,23175,6169,6168,6160,6189	RPL26,RPL27,RPL27A,CAPN10,PRKAR2B,RPL35,CAV2,RPS9,RPS14,TNFRSF25,DSG3,AKR1D1,RPL19,RPL18,RPS17,RPL9,RPL12,SDPR,GZMB,EIF3G,NT5DC3,RPS19,RPL14,APRT,RPL5,RPL4,PPIA,SOD1,FBLIM1,RAN,BPNT1,DUT,FANCC,LPIN1,RPL38,RPL37A,RPL31,RPS3A
GO:0006364|rRNA processing	0.000549248	6.6691	90121,6154,6208,6218,317781,6223,9045,24140,6125	TSR2,RPL26,RPS14,RPS17,DDX51,RPS19,RPL14,FTSJ1,RPL5
GO:0044249|cellular biosynthetic process	0.000549248	2.09701	6154,6155,6157,286826,84545,108,11224,6203,6208,10849,4666,56953,6718,6143,6141,5498,64981,6218,10476,6133,6136,65008,1544,5610,2069,5027,6223,9045,353,6125,6124,6647,1854,6169,6168,6160,6166,6189,477	RPL26,RPL27,RPL27A,LIN9,MRPL43,ADCY2,RPL35,RPS9,RPS14,CD3EAP,NACA,NT5M,AKR1D1,RPL19,RPL18,PPOX,MRPL34,RPS17,ATP5H,RPL9,RPL12,MRPL1,CYP1A2,EIF2AK2,EREG,P2RX7,RPS19,RPL14,APRT,RPL5,RPL4,SOD1,DUT,RPL38,RPL37A,RPL31,RPL36AL,RPS3A,ATP1A2
GO:0016072|rRNA metabolic process	0.000719543	6.40234	90121,6154,6208,6218,317781,6223,9045,24140,6125	TSR2,RPL26,RPS14,RPS17,DDX51,RPS19,RPL14,FTSJ1,RPL5
GO:0022613|ribonucleoprotein complex biogenesis	0.00158006	9.92611	6154,54552,6218,6223,9045,6125	RPL26,GNL3L,RPS17,RPS19,RPL14,RPL5
GO:0009058|biosynthetic process	0.00158006	1.96511	6154,6155,6157,286826,84545,108,11224,6203,6208,10849,4666,56953,6718,6143,6141,5498,64981,6218,10476,6133,6136,65008,1544,5610,2069,5027,6223,9045,353,6125,6124,6647,1854,84681,6169,6168,6160,6166,6189,477	RPL26,RPL27,RPL27A,LIN9,MRPL43,ADCY2,RPL35,RPS9,RPS14,CD3EAP,NACA,NT5M,AKR1D1,RPL19,RPL18,PPOX,MRPL34,RPS17,ATP5H,RPL9,RPL12,MRPL1,CYP1A2,EIF2AK2,EREG,P2RX7,RPS19,RPL14,APRT,RPL5,RPL4,SOD1,DUT,HINT2,RPL38,RPL37A,RPL31,RPL36AL,RPS3A,ATP1A2
GO:0044085|cellular component biogenesis	0.00222032	9.27875	6154,54552,6218,6223,9045,6125	RPL26,GNL3L,RPS17,RPS19,RPL14,RPL5
GO:0044444|cytoplasmic part	0.0053719	1.39513	710,6154,6155,6157,84545,292,11132,55830,4353,5577,1511,84129,11224,858,6203,6208,2681,8718,192134,1991,23509,999,169026,4666,1191,1830,56953,55333,6718,6143,6141,5498,55803,64981,29841,387914,5037,2021,28957,28958,6218,10476,6133,6136,7060,1267,65008,1544,2244,8436,8029,9173,23463,51599,150274,23531,3002,1350,2109,8666,51559,51001,6223,84174,9045,353,6125,6124,5473,5478,6647,54751,5901,6391,1038…	SERPING1,RPL26,RPL27,RPL27A,MRPL43,SLC25A5,CAPN10,GLT8D1,MPO,PRKAR2B,CTSG,ACAD11,RPL35,CAV2,RPS9,RPS14,GGTA1,TNFRSF25,B3GNT6,ELANE,POFUT1,CDH1,SLC30A8,NACA,CLU,DSG3,NT5M,SYNJ2BP,AKR1D1,RPL19,RPL18,PPOX,ADAP2,MRPL34,GRHL1,SHISA2,PEBP1,ENDOG,MRPS28,CCDC56,RPS17,ATP5H,RPL9,RPL12,THBS4,CNP,MRPL1,CYP1A2,FGB,SDPR,CUBN,IL1RL1,ICMT,LSR,HSCB,MMD,GZMB,COX7C,ETFB,EIF3G,NT5DC3,MTERFD1,RPS19,SLA2,RPL14,APRT,R…
GO:0022627|cytosolic small ribosomal subunit	0.00856656	9.36014	6203,6208,6218,6223,6189	RPS9,RPS14,RPS17,RPS19,RPS3A
GO:0015935|small ribosomal subunit	0.00953559	6.99709	6203,6208,28957,6218,6223,6189	RPS9,RPS14,MRPS28,RPS17,RPS19,RPS3A
GO:0043232|intracellular non-membrane-bounded organelle	0.0105425	1.68589	6154,6155,6157,84545,292,11130,54552,11224,6203,6208,10849,999,6143,6141,3014,64981,29841,28957,6218,55200,317781,6133,6136,3652,65008,23567,9173,51599,6223,9045,6125,6124,1073,54751,29997,23177,6169,6168,6160,6166,4603,7169,136991,6189,79648,10174	RPL26,RPL27,RPL27A,MRPL43,SLC25A5,ZWINT,GNL3L,RPL35,RPS9,RPS14,CD3EAP,CDH1,RPL19,RPL18,H2AFX,MRPL34,GRHL1,MRPS28,RPS17,PLEKHG6,DDX51,RPL9,RPL12,IPP,MRPL1,ZNF346,IL1RL1,LSR,RPS19,RPL14,RPL5,RPL4,CFL2,FBLIM1,GLTSCR2,CEP68,RPL38,RPL37A,RPL31,RPL36AL,MYBL1,TPM2,ASZ1,RPS3A,MCPH1,SORBS3
GO:0043228|non-membrane-bounded organelle	0.0105425	1.68589	6154,6155,6157,84545,292,11130,54552,11224,6203,6208,10849,999,6143,6141,3014,64981,29841,28957,6218,55200,317781,6133,6136,3652,65008,23567,9173,51599,6223,9045,6125,6124,1073,54751,29997,23177,6169,6168,6160,6166,4603,7169,136991,6189,79648,10174	RPL26,RPL27,RPL27A,MRPL43,SLC25A5,ZWINT,GNL3L,RPL35,RPS9,RPS14,CD3EAP,CDH1,RPL19,RPL18,H2AFX,MRPL34,GRHL1,MRPS28,RPS17,PLEKHG6,DDX51,RPL9,RPL12,IPP,MRPL1,ZNF346,IL1RL1,LSR,RPS19,RPL14,RPL5,RPL4,CFL2,FBLIM1,GLTSCR2,CEP68,RPL38,RPL37A,RPL31,RPL36AL,MYBL1,TPM2,ASZ1,RPS3A,MCPH1,SORBS3
GO:0031093|platelet alpha granule lumen	0.0105425	8.67526	710,1191,7060,2244,5473	SERPING1,CLU,THBS4,FGB,PPBP
GO:0042273|ribosomal large subunit biogenesis	0.0116923	21.3411	6154,9045,6125	RPL26,RPL14,RPL5
GO:0060205|cytoplasmic membrane-bounded vesicle lumen	0.0134608	8.08376	710,1191,7060,2244,5473	SERPING1,CLU,THBS4,FGB,PPBP
GO:0031983|vesicle lumen	0.0160137	7.73229	710,1191,7060,2244,5473	SERPING1,CLU,THBS4,FGB,PPBP
GO:0002262|myeloid cell homeostasis	0.0200306	47.4247	6647,2176	SOD1,FANCC
GO:0003723|RNA binding	0.0214696	2.1468	6154,6157,10147,11224,6203,6208,6143,6141,317781,6133,6136,65008,23567,5610,8666,6223,9045,6125,6124,6169,6160,6189	RPL26,RPL27A,SFRS14,RPL35,RPS9,RPS14,RPL19,RPL18,DDX51,RPL9,RPL12,MRPL1,ZNF346,EIF2AK2,EIF3G,RPS19,RPL14,RPL5,RPL4,RPL38,RPL31,RPS3A
GO:0045182|translation regulator activity	0.025098	9.48495	84545,6203,6208,64981	MRPL43,RPS9,RPS14,MRPL34
GO:0031640|killing of cells of another organism	0.027641	15.2437	1669,8542,10578	DEFA4,APOL1,GNLY
GO:0016266|O-glycan processing	0.0348783	35.5685	192134,23509	B3GNT6,POFUT1
GO:0034470|ncRNA processing	0.043882	3.36965	90121,6154,6208,6218,317781,6223,9045,24140,6125	TSR2,RPL26,RPS14,RPS17,DDX51,RPS19,RPL14,FTSJ1,RPL5
GO:0034660|ncRNA metabolic process	0.0495839	3.05309	90121,6154,6208,6218,317781,6223,9045,24140,6125,136991	TSR2,RPL26,RPS14,RPS17,DDX51,RPS19,RPL14,FTSJ1,RPL5,ASZ1
03010|Ribosome	2.03412e-08	8.14006	6154,6155,6157,11224,6203,6143,6141,6133,6136,9045,6169,6168,6160,6166	RPL26,RPL27,RPL27A,RPL35,RPS9,RPL19,RPL18,RPL9,RPL12,RPL14,RPL38,RPL37A,RPL31,RPL36AL
