# Supplementary material for: Transcriptome and Network Changes in Climbers at Extreme Altitudes
Source: PLoS One. 2012 Feb 29;7(2):e31645. doi: 10.1371/journal.pone.0031645 (PMC3290542; doi:10.1371/journal.pone.0031645)
Supplement: Table S8 — All the functional and regulatory interactions in the Full Regulatory Network. (XLS) [file pone.0031645.s016.xls]

## Sheet: Sheet1
Supplementary table 8 | All the functional and regulatory interactions in the Full Regulatory Network
GID 1	Gene Symbol 1	Gene Description 1	GID 2	Gene Symbol 2	Gene Description 2	Interaction type	Source
hsa-miR-410	hsa-miR-410	hsa-miR-410	23762	OSBP2	oxysterol binding protein 2	miRNA->gene	TargetScan
3958	LGALS3	lectin, galactoside-binding, soluble, 3	4318	MMP9	matrix metallopeptidase 9 (gelatinase B, 92kDa gelatinase, 92kDa type IV collagenase)	Undirected	STRING
6154	RPL26	ribosomal protein L26	6223	RPS19	ribosomal protein S19	Undirected	IntNetDB
6929	TCF3	transcription factor 3 (E2A immunoglobulin enhancer binding factors E12/E47)	7027	TFDP1	transcription factor Dp-1	Undirected	STRING
6720	SREBF1	sterol regulatory element binding transcription factor 1	57646	USP28	ubiquitin specific peptidase 28	TF->gene	TRANSFAC
2038	EPB42	erythrocyte membrane protein band 4.2	51218	GLRX5	glutaredoxin 5	Undirected	IntNetDB
6929	TCF3	transcription factor 3 (E2A immunoglobulin enhancer binding factors E12/E47)	3191	HNRNPL	heterogeneous nuclear ribonucleoprotein L	TF->gene	TRANSFAC,JASPAR
5336	PLCG2	phospholipase C, gamma 2 (phosphatidylinositol-specific)	113026	PLCD3	phospholipase C, delta 3	KEGG directed	KEGG,STRING
1998	ELF2	E74-like factor 2 (ets domain transcription factor)	9086	EIF1AY	eukaryotic translation initiation factor 1A, Y-linked	TF->gene	TRANSFAC
6256	RXRA	retinoid X receptor, alpha	6718	AKR1D1	aldo-keto reductase family 1, member D1 (delta 4-3-ketosteroid-5-beta-reductase)	TF->gene	TRANSFAC,JASPAR
2358	FPRL1	formyl peptide receptor 2	3820	KLRB1	killer cell lectin-like receptor subfamily B, member 1	Undirected	IntNetDB
3727	JUND	jun D proto-oncogene	11081	KERA	keratocan	TF->gene	TRANSFAC
10261	IGSF6	immunoglobulin superfamily, member 6	5724	PTAFR	platelet-activating factor receptor	Undirected	IntNetDB
6667	SP1	Sp1 transcription factor	9645	MICAL2	microtubule associated monoxygenase, calponin and LIM domain containing 2	TF->gene	TRANSFAC
6667	SP1	Sp1 transcription factor	9647	PPM1F	protein phosphatase 1F (PP2C domain containing)	TF->gene	TRANSFAC
6668	SP2	Sp2 transcription factor	708	C1QBP	complement component 1, q subcomponent binding protein	TF->gene	TRANSFAC
10261	IGSF6	immunoglobulin superfamily, member 6	5473	PPBP	pro-platelet basic protein (chemokine (C-X-C motif) ligand 7)	Undirected	IntNetDB
4807	NHLH1	nescient helix loop helix 1	2701	GJA4	gap junction protein, alpha 4, 37kDa	TF->gene	TRANSFAC
2358	FPRL1	formyl peptide receptor 2	5724	PTAFR	platelet-activating factor receptor	Undirected	IntNetDB
1385	CREB1	cAMP responsive element binding protein 1	25793	FBXO7	F-box protein 7	TF->gene	TRANSFAC
hsa-miR-19b	hsa-miR-19b	hsa-miR-19b	2887	GRB10	growth factor receptor-bound protein 10	miRNA->gene	TargetScan
1051	CEBPB	CCAAT/enhancer binding protein (C/EBP), beta	4253	CTAGE5	CTAGE family, member 5	TF->gene	TRANSFAC
6161	RPL32	ribosomal protein L32	6125	RPL5	ribosomal protein L5	Undirected	STRING,IntNetDB
6256	RXRA	retinoid X receptor, alpha	997	CDC34	cell division cycle 34 homolog (S. cerevisiae)	TF->gene	JASPAR
2766	GMPR	guanosine monophosphate reductase	5498	PPOX	protoporphyrinogen oxidase	Undirected	IntNetDB
6667	SP1	Sp1 transcription factor	6256	RXRA	retinoid X receptor, alpha	Undirected	STRING
405	ARNT	aryl hydrocarbon receptor nuclear translocator	3727	JUND	jun D proto-oncogene	TF->gene	JASPAR
6208	RPS14	ribosomal protein S14	6161	RPL32	ribosomal protein L32	Undirected	STRING,IntNetDB
11224	RPL35	ribosomal protein L35	6208	RPS14	ribosomal protein S14	Undirected	STRING,IntNetDB
7157	TP53	tumor protein p53	7555	CNBP	CCHC-type zinc finger, nucleic acid binding protein	Undirected	STRING
2109	ETFB	electron-transfer-flavoprotein, beta polypeptide	708	C1QBP	complement component 1, q subcomponent binding protein	Undirected	IntNetDB
6208	RPS14	ribosomal protein S14	6168	RPL37A	ribosomal protein L37a	Undirected	STRING,IntNetDB
6722	SRF	serum response factor (c-fos serum response element-binding transcription factor)	728	C5AR1	complement component 5a receptor 1	TF->gene	TRANSFAC
6155	RPL27	ribosomal protein L27	6125	RPL5	ribosomal protein L5	Undirected	STRING,IntNetDB
6155	RPL27	ribosomal protein L27	6124	RPL4	ribosomal protein L4	Undirected	STRING,IntNetDB
6374	CXCL5	chemokine (C-X-C motif) ligand 5	3579	IL8RB	interleukin 8 receptor, beta	Undirected	KEGG,STRING
7157	TP53	tumor protein p53	6647	SOD1	superoxide dismutase 1, soluble	Undirected	STRING
hsa-miR-320b	hsa-miR-320b	hsa-miR-320b	2114	ETS2	v-ets erythroblastosis virus E26 oncogene homolog 2 (avian)	miRNA->gene	TargetScan
2114	ETS2	v-ets erythroblastosis virus E26 oncogene homolog 2 (avian)	83442	SH3BGRL3	SH3 domain binding glutamic acid-rich protein like 3	TF->gene	TRANSFAC
6722	SRF	serum response factor (c-fos serum response element-binding transcription factor)	9586	CREB5	cAMP responsive element binding protein 5	TF->gene	TRANSFAC
6668	SP2	Sp2 transcription factor	637	BID	BH3 interacting domain death agonist	TF->gene	TRANSFAC
2109	ETFB	electron-transfer-flavoprotein, beta polypeptide	4051	CYP4F3	cytochrome P450, family 4, subfamily F, polypeptide 3	Undirected	IntNetDB
6161	RPL32	ribosomal protein L32	6728	SRP19	signal recognition particle 19kDa	Undirected	IntNetDB
6668	SP2	Sp2 transcription factor	79143	MBOAT7	membrane bound O-acyltransferase domain containing 7	TF->gene	TRANSFAC
25793	FBXO7	F-box protein 7	7027	TFDP1	transcription factor Dp-1	Undirected	IntNetDB
hsa-miR-124	hsa-miR-124	hsa-miR-124	84159	ARID5B	AT rich interactive domain 5B (MRF1-like)	miRNA->gene	TargetScan
2114	ETS2	v-ets erythroblastosis virus E26 oncogene homolog 2 (avian)	57533	TBC1D14	TBC1 domain family, member 14	TF->gene	TRANSFAC
1051	CEBPB	CCAAT/enhancer binding protein (C/EBP), beta	3820	KLRB1	killer cell lectin-like receptor subfamily B, member 1	TF->gene	TRANSFAC
1032	CDKN2D	cyclin-dependent kinase inhibitor 2D (p19, inhibits CDK4)	5111	PCNA	proliferating cell nuclear antigen	Undirected	STRING
23598	PATZ1	POZ (BTB) and AT hook containing zinc finger 1	57126	CD177	CD177 molecule	TF->gene	TRANSFAC
2219	FCN1	ficolin (collagen/fibrinogen domain containing) 1	6279	S100A8	S100 calcium binding protein A8	Undirected	IntNetDB
1050	CEBPA	CCAAT/enhancer binding protein (C/EBP), alpha	6176	RPLP1	ribosomal protein, large, P1	TF->gene	TRANSFAC
2995	GYPC	glycophorin C (Gerbich blood group)	51218	GLRX5	glutaredoxin 5	Undirected	IntNetDB
6667	SP1	Sp1 transcription factor	219931	TPCN2	two pore segment channel 2	TF->gene	TRANSFAC
2109	ETFB	electron-transfer-flavoprotein, beta polypeptide	2908	NR3C1	nuclear receptor subfamily 3, group C, member 1 (glucocorticoid receptor)	Undirected	IntNetDB
hsa-miR-454	hsa-miR-454	hsa-miR-454	2180	ACSL1	acyl-CoA synthetase long-chain family member 1	miRNA->gene	TargetScan
6720	SREBF1	sterol regulatory element binding transcription factor 1	11132	CAPN10	calpain 10	TF->gene	TRANSFAC
405	ARNT	aryl hydrocarbon receptor nuclear translocator	23639	LRRC6	leucine rich repeat containing 6	TF->gene	TRANSFAC
11224	RPL35	ribosomal protein L35	7555	CNBP	CCHC-type zinc finger, nucleic acid binding protein	Undirected	IntNetDB
2353	FOS	v-fos FBJ murine osteosarcoma viral oncogene homolog	240	ALOX5	arachidonate 5-lipoxygenase	Undirected	IntNetDB
2584	GALK1	galactokinase 1	51599	LSR	lipolysis stimulated lipoprotein receptor	Undirected	IntNetDB
6256	RXRA	retinoid X receptor, alpha	92799	SHKBP1	SH3KBP1 binding protein 1	TF->gene	JASPAR
6169	RPL38	ribosomal protein L38	6176	RPLP1	ribosomal protein, large, P1	Undirected	STRING,IntNetDB
1051	CEBPB	CCAAT/enhancer binding protein (C/EBP), beta	114991	ZNF618	zinc finger protein 618	TF->gene	TRANSFAC
7555	CNBP	CCHC-type zinc finger, nucleic acid binding protein	4318	MMP9	matrix metallopeptidase 9 (gelatinase B, 92kDa gelatinase, 92kDa type IV collagenase)	Undirected	STRING
7320	UBE2B	ubiquitin-conjugating enzyme E2B (RAD6 homolog)	7316	UBC	ubiquitin C	Undirected	STRING
hsa-miR-130a	hsa-miR-130a	hsa-miR-130a	6809	STX3	syntaxin 3	miRNA->gene	PicTar
1998	ELF2	E74-like factor 2 (ets domain transcription factor)	57705	WDFY4	WDFY family member 4	TF->gene	TRANSFAC
4899	NRF1	nuclear respiratory factor 1	10147	SFRS14	splicing factor, arginine/serine-rich 14	TF->gene	TRANSFAC
6133	RPL9	ribosomal protein L9	7178	TPT1	tumor protein, translationally-controlled 1	Undirected	IntNetDB
6670	SP3	Sp3 transcription factor	83999	KREMEN1	kringle containing transmembrane protein 1	TF->gene	TRANSFAC
23598	PATZ1	POZ (BTB) and AT hook containing zinc finger 1	2701	GJA4	gap junction protein, alpha 4, 37kDa	TF->gene	TRANSFAC
7157	TP53	tumor protein p53	3579	IL8RB	interleukin 8 receptor, beta	TF->gene	TRANSFAC
645	BLVRB	biliverdin reductase B (flavin reductase (NADPH))	7001	PRDX2	peroxiredoxin 2	Undirected	IntNetDB
1050	CEBPA	CCAAT/enhancer binding protein (C/EBP), alpha	1052	CEBPD	CCAAT/enhancer binding protein (C/EBP), delta	Undirected	IntNetDB
1050	CEBPA	CCAAT/enhancer binding protein (C/EBP), alpha	1051	CEBPB	CCAAT/enhancer binding protein (C/EBP), beta	Undirected	IntNetDB
6728	SRP19	signal recognition particle 19kDa	80017	C14orf159	chromosome 14 open reading frame 159	Undirected	IntNetDB
6668	SP2	Sp2 transcription factor	203259	C9orf25	chromosome 9 open reading frame 25	TF->gene	TRANSFAC
6667	SP1	Sp1 transcription factor	22924	MAPRE3	microtubule-associated protein, RP/EB family, member 3	TF->gene	TRANSFAC
6668	SP2	Sp2 transcription factor	2987	GUK1	guanylate kinase 1	TF->gene	TRANSFAC
860	RUNX2	runt-related transcription factor 2	6840	SVIL	supervillin	TF->gene	TRANSFAC
10487	CAP1	CAP, adenylate cyclase-associated protein 1 (yeast)	2771	GNAI2	guanine nucleotide binding protein (G protein), alpha inhibiting activity polypeptide 2	Undirected	IntNetDB
6166	RPL36AL	ribosomal protein L36a-like	6176	RPLP1	ribosomal protein, large, P1	Undirected	IntNetDB
7157	TP53	tumor protein p53	2114	ETS2	v-ets erythroblastosis virus E26 oncogene homolog 2 (avian)	Undirected	STRING
6667	SP1	Sp1 transcription factor	571	BACH1	BTB and CNC homology 1, basic leucine zipper transcription factor 1	TF->gene	TRANSFAC
1052	CEBPD	CCAAT/enhancer binding protein (C/EBP), delta	8531	CSDA	cold shock domain protein A	TF->gene	TRANSFAC
3014	H2AFX	H2A histone family, member X	5901	RAN	RAN, member RAS oncogene family	Undirected	IntNetDB
84159	ARID5B	AT rich interactive domain 5B (MRF1-like)	51024	FIS1	fission 1 (mitochondrial outer membrane) homolog (S. cerevisiae)	TF->gene	TRANSFAC
5460	POU5F1	POU class 5 homeobox 1	644660	C8orf81	chromosome 8 open reading frame 81	TF->gene	TRANSFAC
1998	ELF2	E74-like factor 2 (ets domain transcription factor)	3482	IGF2R	insulin-like growth factor 2 receptor	TF->gene	TRANSFAC
5336	PLCG2	phospholipase C, gamma 2 (phosphatidylinositol-specific)	9651	PLCH2	phospholipase C, eta 2	Undirected	IntNetDB
5498	PPOX	protoporphyrinogen oxidase	7504	XK	X-linked Kx blood group (McLeod syndrome)	Undirected	IntNetDB
1054	CEBPG	CCAAT/enhancer binding protein (C/EBP), gamma	51	ACOX1	acyl-Coenzyme A oxidase 1, palmitoyl	TF->gene	TRANSFAC
6143	RPL19	ribosomal protein L19	6157	RPL27A	ribosomal protein L27a	Undirected	STRING,IntNetDB
6143	RPL19	ribosomal protein L19	6155	RPL27	ribosomal protein L27	Undirected	STRING,IntNetDB
6143	RPL19	ribosomal protein L19	6154	RPL26	ribosomal protein L26	Undirected	IntNetDB
571	BACH1	BTB and CNC homology 1, basic leucine zipper transcription factor 1	5111	PCNA	proliferating cell nuclear antigen	TF->gene	TRANSFAC
hsa-miR-19b	hsa-miR-19b	hsa-miR-19b	19	ABCA1	ATP-binding cassette, sub-family A (ABC1), member 1	miRNA->gene	PicTar,TargetScan
200315	APOBEC3A	apolipoprotein B mRNA editing enzyme, catalytic polypeptide-like 3A	978	CDA	cytidine deaminase	Undirected	STRING,IntNetDB
10681	GNB5	guanine nucleotide binding protein (G protein), beta 5	645	BLVRB	biliverdin reductase B (flavin reductase (NADPH))	Undirected	STRING
84803	AGPAT9	1-acylglycerol-3-phosphate O-acyltransferase 9	2819	GPD1	glycerol-3-phosphate dehydrogenase 1 (soluble)	KEGG directed	KEGG
23433	RHOQ	ras homolog gene family, member Q	64411	CENTD3	centaurin, delta 3	Undirected	STRING
6720	SREBF1	sterol regulatory element binding transcription factor 1	201163	FLCN	folliculin	TF->gene	TRANSFAC
6670	SP3	Sp3 transcription factor	6888	TALDO1	transaldolase 1	TF->gene	TRANSFAC
6720	SREBF1	sterol regulatory element binding transcription factor 1	7320	UBE2B	ubiquitin-conjugating enzyme E2B (RAD6 homolog)	TF->gene	TRANSFAC
7157	TP53	tumor protein p53	7316	UBC	ubiquitin C	Undirected	STRING
6256	RXRA	retinoid X receptor, alpha	66002	CYP4F12	cytochrome P450, family 4, subfamily F, polypeptide 12	TF->gene	TRANSFAC
hsa-miR-124	hsa-miR-124	hsa-miR-124	168455	FLJ36031	hypothetical protein FLJ36031	miRNA->gene	TargetScan
25893	TRIM58	tripartite motif-containing 58	9921	RNF10	ring finger protein 10	Undirected	IntNetDB
6929	TCF3	transcription factor 3 (E2A immunoglobulin enhancer binding factors E12/E47)	11186	RASSF1	Ras association (RalGDS/AF-6) domain family member 1	TF->gene	TRANSFAC
55840	EAF2	ELL associated factor 2	6670	SP3	Sp3 transcription factor	Undirected	IntNetDB
6668	SP2	Sp2 transcription factor	9170	EDG4	lysophosphatidic acid receptor 2	TF->gene	TRANSFAC
6667	SP1	Sp1 transcription factor	143686	SESN3	sestrin 3	TF->gene	TRANSFAC
hsa-miR-320c	hsa-miR-320c	hsa-miR-320c	51571	FAM49B	family with sequence similarity 49, member B	miRNA->gene	TargetScan
6160	RPL31	ribosomal protein L31	9045	RPL14	ribosomal protein L14	Undirected	STRING,IntNetDB
6124	RPL4	ribosomal protein L4	6189	RPS3A	ribosomal protein S3A	Undirected	STRING,IntNetDB
1051	CEBPB	CCAAT/enhancer binding protein (C/EBP), beta	6256	RXRA	retinoid X receptor, alpha	Undirected	IntNetDB
51327	ERAF	erythroid associated factor	7027	TFDP1	transcription factor Dp-1	Undirected	IntNetDB
2358	FPRL1	formyl peptide receptor 2	728	C5AR1	complement component 5a receptor 1	Undirected	IntNetDB
6668	SP2	Sp2 transcription factor	10174	SORBS3	sorbin and SH3 domain containing 3	TF->gene	TRANSFAC
5111	PCNA	proliferating cell nuclear antigen	5901	RAN	RAN, member RAS oncogene family	Undirected	IntNetDB
6667	SP1	Sp1 transcription factor	91663	MYADM	myeloid-associated differentiation marker	TF->gene	TRANSFAC
4780	NFE2L2	nuclear factor (erythroid-derived 2)-like 2	3429	IFI27	interferon, alpha-inducible protein 27	TF->gene	TRANSFAC,JASPAR
5460	POU5F1	POU class 5 homeobox 1	3047	HBG1	hemoglobin, gamma A	TF->gene	TRANSFAC
6668	SP2	Sp2 transcription factor	3662	IRF4	interferon regulatory factor 4	TF->gene	TRANSFAC
5460	POU5F1	POU class 5 homeobox 1	3043	HBB	hemoglobin, beta	TF->gene	TRANSFAC
5460	POU5F1	POU class 5 homeobox 1	3048	HBG2	hemoglobin, gamma G	TF->gene	TRANSFAC
9045	RPL14	ribosomal protein L14	6157	RPL27A	ribosomal protein L27a	Undirected	STRING,IntNetDB
2995	GYPC	glycophorin C (Gerbich blood group)	7504	XK	X-linked Kx blood group (McLeod syndrome)	Undirected	IntNetDB
hsa-miR-124	hsa-miR-124	hsa-miR-124	6238	RRBP1	ribosome binding protein 1 homolog 180kDa (dog)	miRNA->gene	TargetScan
hsa-miR-223	hsa-miR-223	hsa-miR-223	6667	SP1	Sp1 transcription factor	miRNA->gene	TargetScan
6929	TCF3	transcription factor 3 (E2A immunoglobulin enhancer binding factors E12/E47)	84681	HINT2	histidine triad nucleotide binding protein 2	TF->gene	TRANSFAC
6667	SP1	Sp1 transcription factor	2114	ETS2	v-ets erythroblastosis virus E26 oncogene homolog 2 (avian)	TF->gene	TRANSFAC
4899	NRF1	nuclear respiratory factor 1	339344	LOC339344	hypothetical protein LOC339344	TF->gene	TRANSFAC
3820	KLRB1	killer cell lectin-like receptor subfamily B, member 1	965	CD58	CD58 molecule	Undirected	IntNetDB
1051	CEBPB	CCAAT/enhancer binding protein (C/EBP), beta	400927	LOC400927	TPTE and PTEN homologous inositol lipid phosphatase pseudogene	TF->gene	TRANSFAC
1052	CEBPD	CCAAT/enhancer binding protein (C/EBP), delta	51	ACOX1	acyl-Coenzyme A oxidase 1, palmitoyl	TF->gene	TRANSFAC
6256	RXRA	retinoid X receptor, alpha	25797	QPCT	glutaminyl-peptide cyclotransferase	TF->gene	JASPAR
89846	FGD3	FYVE, RhoGEF and PH domain containing 3	998	CDC42	cell division cycle 42 (GTP binding protein, 25kDa)	KEGG directed	KEGG,STRING
hsa-miR-223	hsa-miR-223	hsa-miR-223	27154	BRPF3	bromodomain and PHD finger containing, 3	miRNA->gene	TargetScan
3727	JUND	jun D proto-oncogene	6281	S100A10	S100 calcium binding protein A10	TF->gene	TRANSFAC
2623	GATA1	GATA binding protein 1 (globin transcription factor 1)	57568	SIPA1L2	signal-induced proliferation-associated 1 like 2	TF->gene	TRANSFAC
6137	RPL13	ribosomal protein L13	6208	RPS14	ribosomal protein S14	Undirected	STRING,IntNetDB
hsa-miR-142-3p	hsa-miR-142-3p	hsa-miR-142-3p	571	BACH1	BTB and CNC homology 1, basic leucine zipper transcription factor 1	miRNA->gene	PicTar,TargetScan
6668	SP2	Sp2 transcription factor	9990	SLC12A6	solute carrier family 12 (potassium/chloride transporters), member 6	TF->gene	TRANSFAC
10261	IGSF6	immunoglobulin superfamily, member 6	728	C5AR1	complement component 5a receptor 1	Undirected	IntNetDB
11224	RPL35	ribosomal protein L35	6205	RPS11	ribosomal protein S11	Undirected	STRING,IntNetDB
4666	NACA	nascent polypeptide-associated complex alpha subunit	6223	RPS19	ribosomal protein S19	Undirected	IntNetDB
405	ARNT	aryl hydrocarbon receptor nuclear translocator	6622	SNCA	synuclein, alpha (non A4 component of amyloid precursor)	TF->gene	TRANSFAC
129642	MBOAT2	membrane bound O-acyltransferase domain containing 2	212	ALAS2	aminolevulinate, delta-, synthase 2	Undirected	IntNetDB
2038	EPB42	erythrocyte membrane protein band 4.2	645	BLVRB	biliverdin reductase B (flavin reductase (NADPH))	Undirected	IntNetDB
4974	OMG	oligodendrocyte myelin glycoprotein	55803	CENTA2	centaurin, alpha 2	Undirected	STRING
10147	SFRS14	splicing factor, arginine/serine-rich 14	4253	CTAGE5	CTAGE family, member 5	Undirected	IntNetDB
6929	TCF3	transcription factor 3 (E2A immunoglobulin enhancer binding factors E12/E47)	4807	NHLH1	nescient helix loop helix 1	Undirected	STRING
6668	SP2	Sp2 transcription factor	57646	USP28	ubiquitin specific peptidase 28	TF->gene	TRANSFAC
1669	DEFA4	defensin, alpha 4, corticostatin	820	CAMP	cathelicidin antimicrobial peptide	Undirected	IntNetDB
51327	ERAF	erythroid associated factor	8991	SELENBP1	selenium binding protein 1	Undirected	IntNetDB
11343	MGLL	monoglyceride lipase	2180	ACSL1	acyl-CoA synthetase long-chain family member 1	Undirected	STRING
hsa-miR-301a	hsa-miR-301a	hsa-miR-301a	168455	FLJ36031	hypothetical protein FLJ36031	miRNA->gene	TargetScan
2995	GYPC	glycophorin C (Gerbich blood group)	2996	GYPE	glycophorin E	Undirected	IntNetDB
hsa-miR-424	hsa-miR-424	hsa-miR-424	5045	FURIN	furin (paired basic amino acid cleaving enzyme)	miRNA->gene	TargetScan
hsa-miR-320c	hsa-miR-320c	hsa-miR-320c	389136	VGLL3	vestigial like 3 (Drosophila)	miRNA->gene	TargetScan
hsa-miR-301a	hsa-miR-301a	hsa-miR-301a	57568	SIPA1L2	signal-induced proliferation-associated 1 like 2	miRNA->gene	TargetScan
25793	FBXO7	F-box protein 7	645	BLVRB	biliverdin reductase B (flavin reductase (NADPH))	Undirected	IntNetDB
4780	NFE2L2	nuclear factor (erythroid-derived 2)-like 2	79689	STEAP4	STEAP family member 4	TF->gene	TRANSFAC
637	BID	BH3 interacting domain death agonist	6667	SP1	Sp1 transcription factor	Undirected	STRING
hsa-miR-301a	hsa-miR-301a	hsa-miR-301a	1870	E2F2	E2F transcription factor 2	miRNA->gene	TargetScan
6282	S100A11	S100 calcium binding protein A11	309	ANXA6	annexin A6	Undirected	STRING
1830	DSG3	desmoglein 3 (pemphigus vulgaris antigen)	3848	KRT1	keratin 1	Undirected	IntNetDB
56953	NT5M	5',3'-nucleotidase, mitochondrial	978	CDA	cytidine deaminase	KEGG directed	KEGG
2353	FOS	v-fos FBJ murine osteosarcoma viral oncogene homolog	860	RUNX2	runt-related transcription factor 2	Undirected	STRING
6667	SP1	Sp1 transcription factor	124590	USH1G	Usher syndrome 1G (autosomal recessive)	TF->gene	TRANSFAC
6722	SRF	serum response factor (c-fos serum response element-binding transcription factor)	23762	OSBP2	oxysterol binding protein 2	TF->gene	TRANSFAC
2219	FCN1	ficolin (collagen/fibrinogen domain containing) 1	64581	CLEC7A	C-type lectin domain family 7, member A	Undirected	IntNetDB
23598	PATZ1	POZ (BTB) and AT hook containing zinc finger 1	1052	CEBPD	CCAAT/enhancer binding protein (C/EBP), delta	TF->gene	TRANSFAC
6160	RPL31	ribosomal protein L31	6137	RPL13	ribosomal protein L13	Undirected	STRING,IntNetDB
2529	FUT7	fucosyltransferase 7 (alpha (1,3) fucosyltransferase)	10402	ST3GAL6	ST3 beta-galactoside alpha-2,3-sialyltransferase 6	KEGG directed	KEGG,STRING,IntNetDB
6223	RPS19	ribosomal protein S19	9045	RPL14	ribosomal protein L14	Undirected	STRING,IntNetDB
2038	EPB42	erythrocyte membrane protein band 4.2	25793	FBXO7	F-box protein 7	Undirected	IntNetDB
10098	TSPAN5	tetraspanin 5	8991	SELENBP1	selenium binding protein 1	Undirected	IntNetDB
1385	CREB1	cAMP responsive element binding protein 1	535	ATP6V0A1	ATPase, H+ transporting, lysosomal V0 subunit a1	TF->gene	TRANSFAC
hsa-miR-134	hsa-miR-134	hsa-miR-134	10335	MRVI1	murine retrovirus integration site 1 homolog	miRNA->gene	TargetScan
1050	CEBPA	CCAAT/enhancer binding protein (C/EBP), alpha	6161	RPL32	ribosomal protein L32	TF->gene	TRANSFAC
3043	HBB	hemoglobin, beta	3045	HBD	hemoglobin, delta	Undirected	IntNetDB
1385	CREB1	cAMP responsive element binding protein 1	3727	JUND	jun D proto-oncogene	TF->gene	TRANSFAC,JASPAR
25793	FBXO7	F-box protein 7	51218	GLRX5	glutaredoxin 5	Undirected	IntNetDB
10098	TSPAN5	tetraspanin 5	5498	PPOX	protoporphyrinogen oxidase	Undirected	IntNetDB
571	BACH1	BTB and CNC homology 1, basic leucine zipper transcription factor 1	6653	SORL1	sortilin-related receptor, L(DLR class) A repeats-containing	TF->gene	TRANSFAC
405	ARNT	aryl hydrocarbon receptor nuclear translocator	57646	USP28	ubiquitin specific peptidase 28	TF->gene	TRANSFAC
7157	TP53	tumor protein p53	5111	PCNA	proliferating cell nuclear antigen	TF->gene	TRANSFAC,JASPAR
84159	ARID5B	AT rich interactive domain 5B (MRF1-like)	6161	RPL32	ribosomal protein L32	TF->gene	TRANSFAC
hsa-miR-32	hsa-miR-32	hsa-miR-32	115548	FCHO2	FCH domain only 2	miRNA->gene	TargetScan
2908	NR3C1	nuclear receptor subfamily 3, group C, member 1 (glucocorticoid receptor)	114805	GALNT13	UDP-N-acetyl-alpha-D-galactosamine:polypeptide N-acetylgalactosaminyltransferase 13 (GalNAc-T13)	TF->gene	TRANSFAC
6155	RPL27	ribosomal protein L27	6203	RPS9	ribosomal protein S9	Undirected	STRING,IntNetDB
6155	RPL27	ribosomal protein L27	6205	RPS11	ribosomal protein S11	Undirected	STRING,IntNetDB
6155	RPL27	ribosomal protein L27	6208	RPS14	ribosomal protein S14	Undirected	STRING,IntNetDB
3554	IL1R1	interleukin 1 receptor, type I	7100	TLR5	toll-like receptor 5	Undirected	STRING
3172	HNF4A	hepatocyte nuclear factor 4, alpha	57119	SPINLW1	serine peptidase inhibitor-like, with Kunitz and WAP domains 1 (eppin)	TF->gene	TRANSFAC
2987	GUK1	guanylate kinase 1	4354	MPP1	membrane protein, palmitoylated 1, 55kDa	Undirected	IntNetDB
11025	LILRB3	leukocyte immunoglobulin-like receptor, subfamily B (with TM and ITIM domains), member 3	5473	PPBP	pro-platelet basic protein (chemokine (C-X-C motif) ligand 7)	Undirected	IntNetDB
6166	RPL36AL	ribosomal protein L36a-like	9045	RPL14	ribosomal protein L14	Undirected	IntNetDB
1998	ELF2	E74-like factor 2 (ets domain transcription factor)	2039	EPB49	erythrocyte membrane protein band 4.9 (dematin)	TF->gene	TRANSFAC
hsa-miR-320c	hsa-miR-320c	hsa-miR-320c	27236	ARFIP1	ADP-ribosylation factor interacting protein 1	miRNA->gene	TargetScan
6223	RPS19	ribosomal protein S19	6137	RPL13	ribosomal protein L13	Undirected	STRING,IntNetDB
6670	SP3	Sp3 transcription factor	1032	CDKN2D	cyclin-dependent kinase inhibitor 2D (p19, inhibits CDK4)	TF->gene	TRANSFAC
6670	SP3	Sp3 transcription factor	79143	MBOAT7	membrane bound O-acyltransferase domain containing 7	TF->gene	TRANSFAC
5605	MAP2K2	mitogen-activated protein kinase kinase 2	9846	GAB2	GRB2-associated binding protein 2	Undirected	STRING
6668	SP2	Sp2 transcription factor	203228	C9orf72	chromosome 9 open reading frame 72	TF->gene	TRANSFAC
645	BLVRB	biliverdin reductase B (flavin reductase (NADPH))	6521	SLC4A1	solute carrier family 4, anion exchanger, member 1 (erythrocyte membrane protein band 3, Diego blood group)	Undirected	IntNetDB
2038	EPB42	erythrocyte membrane protein band 4.2	6710	SPTB	spectrin, beta, erythrocytic	Undirected	IntNetDB
6143	RPL19	ribosomal protein L19	9045	RPL14	ribosomal protein L14	Undirected	STRING,IntNetDB
54552	GNL3L	guanine nucleotide binding protein-like 3 (nucleolar)-like	5901	RAN	RAN, member RAS oncogene family	Undirected	IntNetDB
2180	ACSL1	acyl-CoA synthetase long-chain family member 1	2353	FOS	v-fos FBJ murine osteosarcoma viral oncogene homolog	Undirected	STRING
hsa-miR-454	hsa-miR-454	hsa-miR-454	168455	FLJ36031	hypothetical protein FLJ36031	miRNA->gene	TargetScan
84159	ARID5B	AT rich interactive domain 5B (MRF1-like)	1073	CFL2	cofilin 2 (muscle)	TF->gene	TRANSFAC
hsa-miR-320b	hsa-miR-320b	hsa-miR-320b	7555	CNBP	CCHC-type zinc finger, nucleic acid binding protein	miRNA->gene	TargetScan
1051	CEBPB	CCAAT/enhancer binding protein (C/EBP), beta	858	CAV2	caveolin 2	Undirected	IntNetDB
1385	CREB1	cAMP responsive element binding protein 1	645	BLVRB	biliverdin reductase B (flavin reductase (NADPH))	TF->gene	TRANSFAC
6205	RPS11	ribosomal protein S11	6161	RPL32	ribosomal protein L32	Undirected	STRING,IntNetDB
6154	RPL26	ribosomal protein L26	6155	RPL27	ribosomal protein L27	Undirected	IntNetDB
6667	SP1	Sp1 transcription factor	54550	NECAB2	N-terminal EF-hand calcium binding protein 2	TF->gene	TRANSFAC
6668	SP2	Sp2 transcription factor	23186	RCOR1	REST corepressor 1	TF->gene	TRANSFAC
11224	RPL35	ribosomal protein L35	7157	TP53	tumor protein p53	Undirected	IntNetDB
2358	FPRL1	formyl peptide receptor 2	8843	GPR109B	G protein-coupled receptor 109B	Undirected	IntNetDB
6777	STAT5B	signal transducer and activator of transcription 5B	55711	MLSTD1	fatty acyl CoA reductase 2	TF->gene	TRANSFAC
6256	RXRA	retinoid X receptor, alpha	6102	RP2	retinitis pigmentosa 2 (X-linked recessive)	TF->gene	JASPAR
55333	SYNJ2BP	synaptojanin 2 binding protein	60	ACTB	actin, beta	Undirected	STRING
1991	ELA2	elastase 2, neutrophil	4311	MME	membrane metallo-endopeptidase	Undirected	STRING
6929	TCF3	transcription factor 3 (E2A immunoglobulin enhancer binding factors E12/E47)	51571	FAM49B	family with sequence similarity 49, member B	TF->gene	TRANSFAC
4354	MPP1	membrane protein, palmitoylated 1, 55kDa	51218	GLRX5	glutaredoxin 5	Undirected	IntNetDB
1385	CREB1	cAMP responsive element binding protein 1	51000	SLC35B3	solute carrier family 35, member B3	TF->gene	TRANSFAC,JASPAR
200315	APOBEC3A	apolipoprotein B mRNA editing enzyme, catalytic polypeptide-like 3A	64581	CLEC7A	C-type lectin domain family 7, member A	Undirected	IntNetDB
3039	HBA1	hemoglobin, alpha 1	10661	KLF1	Kruppel-like factor 1 (erythroid)	Undirected	STRING
7157	TP53	tumor protein p53	94241	TP53INP1	tumor protein p53 inducible nuclear protein 1	Undirected	STRING
4899	NRF1	nuclear respiratory factor 1	55180	LINS1	lines homolog 1 (Drosophila)	TF->gene	TRANSFAC
4780	NFE2L2	nuclear factor (erythroid-derived 2)-like 2	6840	SVIL	supervillin	TF->gene	TRANSFAC
1385	CREB1	cAMP responsive element binding protein 1	6929	TCF3	transcription factor 3 (E2A immunoglobulin enhancer binding factors E12/E47)	TF->gene	TRANSFAC
6929	TCF3	transcription factor 3 (E2A immunoglobulin enhancer binding factors E12/E47)	200315	APOBEC3A	apolipoprotein B mRNA editing enzyme, catalytic polypeptide-like 3A	TF->gene	TRANSFAC
6667	SP1	Sp1 transcription factor	10077	TSPAN32	tetraspanin 32	TF->gene	TRANSFAC
6137	RPL13	ribosomal protein L13	6191	RPS4X	ribosomal protein S4, X-linked	Undirected	STRING,IntNetDB
2069	EREG	epiregulin	4352	MPL	myeloproliferative leukemia virus oncogene	Undirected	IntNetDB
6143	RPL19	ribosomal protein L19	6189	RPS3A	ribosomal protein S3A	Undirected	STRING,IntNetDB
23509	POFUT1	protein O-fucosyltransferase 1	2529	FUT7	fucosyltransferase 7 (alpha (1,3) fucosyltransferase)	Undirected	IntNetDB
51599	LSR	lipolysis stimulated lipoprotein receptor	6718	AKR1D1	aldo-keto reductase family 1, member D1 (delta 4-3-ketosteroid-5-beta-reductase)	Undirected	IntNetDB
4780	NFE2L2	nuclear factor (erythroid-derived 2)-like 2	6653	SORL1	sortilin-related receptor, L(DLR class) A repeats-containing	TF->gene	TRANSFAC,JASPAR
hsa-miR-320d	hsa-miR-320d	hsa-miR-320d	6667	SP1	Sp1 transcription factor	miRNA->gene	TargetScan
3958	LGALS3	lectin, galactoside-binding, soluble, 3	1191	CLU	clusterin	Undirected	STRING
2597	GAPDH	glyceraldehyde-3-phosphate dehydrogenase	7001	PRDX2	peroxiredoxin 2	Undirected	IntNetDB
3554	IL1R1	interleukin 1 receptor, type I	2353	FOS	v-fos FBJ murine osteosarcoma viral oncogene homolog	Undirected	STRING
6722	SRF	serum response factor (c-fos serum response element-binding transcription factor)	3958	LGALS3	lectin, galactoside-binding, soluble, 3	TF->gene	TRANSFAC
hsa-miR-320d	hsa-miR-320d	hsa-miR-320d	51571	FAM49B	family with sequence similarity 49, member B	miRNA->gene	TargetScan
6667	SP1	Sp1 transcription factor	55796	MBNL3	muscleblind-like 3 (Drosophila)	TF->gene	TRANSFAC
1052	CEBPD	CCAAT/enhancer binding protein (C/EBP), delta	5478	PPIA	peptidylprolyl isomerase A (cyclophilin A)	TF->gene	TRANSFAC
hsa-miR-130a	hsa-miR-130a	hsa-miR-130a	94241	TP53INP1	tumor protein p53 inducible nuclear protein 1	miRNA->gene	PicTar,TargetScan
2908	NR3C1	nuclear receptor subfamily 3, group C, member 1 (glucocorticoid receptor)	80017	C14orf159	chromosome 14 open reading frame 159	TF->gene	TRANSFAC
6208	RPS14	ribosomal protein S14	9045	RPL14	ribosomal protein L14	Undirected	STRING,IntNetDB
2330	FMO5	flavin containing monooxygenase 5	66002	CYP4F12	cytochrome P450, family 4, subfamily F, polypeptide 12	Undirected	IntNetDB
7392	USF2	upstream transcription factor 2, c-fos interacting	3482	IGF2R	insulin-like growth factor 2 receptor	Undirected	STRING
1052	CEBPD	CCAAT/enhancer binding protein (C/EBP), delta	22924	MAPRE3	microtubule-associated protein, RP/EB family, member 3	TF->gene	TRANSFAC
6668	SP2	Sp2 transcription factor	5610	EIF2AK2	eukaryotic translation initiation factor 2-alpha kinase 2	TF->gene	TRANSFAC
6176	RPLP1	ribosomal protein, large, P1	6125	RPL5	ribosomal protein L5	Undirected	STRING,IntNetDB
4807	NHLH1	nescient helix loop helix 1	1073	CFL2	cofilin 2 (muscle)	TF->gene	TRANSFAC
6136	RPL12	ribosomal protein L12	7178	TPT1	tumor protein, translationally-controlled 1	Undirected	IntNetDB
1051	CEBPB	CCAAT/enhancer binding protein (C/EBP), beta	8843	GPR109B	G protein-coupled receptor 109B	TF->gene	TRANSFAC
2321	FLT1	fms-related tyrosine kinase 1 (vascular endothelial growth factor/vascular permeability factor receptor)	60675	PROK2	prokineticin 2	Undirected	IntNetDB
2771	GNAI2	guanine nucleotide binding protein (G protein), alpha inhibiting activity polypeptide 2	4067	LYN	v-yes-1 Yamaguchi sarcoma viral related oncogene homolog	KEGG directed	KEGG
23598	PATZ1	POZ (BTB) and AT hook containing zinc finger 1	292	SLC25A5	solute carrier family 25 (mitochondrial carrier; adenine nucleotide translocator), member 5	TF->gene	TRANSFAC
6929	TCF3	transcription factor 3 (E2A immunoglobulin enhancer binding factors E12/E47)	57646	USP28	ubiquitin specific peptidase 28	TF->gene	TRANSFAC
6653	SORL1	sortilin-related receptor, L(DLR class) A repeats-containing	8542	APOL1	apolipoprotein L, 1	Undirected	IntNetDB
3727	JUND	jun D proto-oncogene	85359	DGCR6L	DiGeorge syndrome critical region gene 6-like	TF->gene	TRANSFAC
5971	RELB	v-rel reticuloendotheliosis viral oncogene homolog B	598	BCL2L1	BCL2-like 1	Undirected	STRING
860	RUNX2	runt-related transcription factor 2	84987	C12orf62	chromosome 12 open reading frame 62	TF->gene	TRANSFAC
23433	RHOQ	ras homolog gene family, member Q	89846	FGD3	FYVE, RhoGEF and PH domain containing 3	Undirected	STRING
122953	JUNDM2	Jun dimerization protein 2	4601	MXI1	MAX interactor 1	Undirected	IntNetDB
6136	RPL12	ribosomal protein L12	6208	RPS14	ribosomal protein S14	Undirected	IntNetDB
9045	RPL14	ribosomal protein L14	6168	RPL37A	ribosomal protein L37a	Undirected	STRING,IntNetDB
6256	RXRA	retinoid X receptor, alpha	10562	OLFM4	olfactomedin 4	TF->gene	JASPAR
1385	CREB1	cAMP responsive element binding protein 1	3221	HOXC4	homeobox C4	TF->gene	TRANSFAC,JASPAR
3579	IL8RB	interleukin 8 receptor, beta	8843	GPR109B	G protein-coupled receptor 109B	Undirected	IntNetDB
7157	TP53	tumor protein p53	11186	RASSF1	Ras association (RalGDS/AF-6) domain family member 1	Undirected	STRING,IntNetDB
6670	SP3	Sp3 transcription factor	6189	RPS3A	ribosomal protein S3A	TF->gene	TRANSFAC
6176	RPLP1	ribosomal protein, large, P1	6728	SRP19	signal recognition particle 19kDa	Undirected	IntNetDB
1593	CYP27A1	cytochrome P450, family 27, subfamily A, polypeptide 1	2330	FMO5	flavin containing monooxygenase 5	Undirected	IntNetDB
hsa-miR-424	hsa-miR-424	hsa-miR-424	2887	GRB10	growth factor receptor-bound protein 10	miRNA->gene	TargetScan
1054	CEBPG	CCAAT/enhancer binding protein (C/EBP), gamma	4780	NFE2L2	nuclear factor (erythroid-derived 2)-like 2	TF->gene	TRANSFAC
hsa-miR-124	hsa-miR-124	hsa-miR-124	203228	C9orf72	chromosome 9 open reading frame 72	miRNA->gene	TargetScan
4601	MXI1	MAX interactor 1	8531	CSDA	cold shock domain protein A	Undirected	IntNetDB
6670	SP3	Sp3 transcription factor	9990	SLC12A6	solute carrier family 12 (potassium/chloride transporters), member 6	TF->gene	TRANSFAC
5591	PRKDC	protein kinase, DNA-activated, catalytic polypeptide	1032	CDKN2D	cyclin-dependent kinase inhibitor 2D (p19, inhibits CDK4)	Undirected	STRING
2038	EPB42	erythrocyte membrane protein band 4.2	7504	XK	X-linked Kx blood group (McLeod syndrome)	Undirected	IntNetDB
51327	ERAF	erythroid associated factor	7504	XK	X-linked Kx blood group (McLeod syndrome)	Undirected	IntNetDB
7178	TPT1	tumor protein, translationally-controlled 1	5610	EIF2AK2	eukaryotic translation initiation factor 2-alpha kinase 2	Undirected	STRING
6143	RPL19	ribosomal protein L19	6191	RPS4X	ribosomal protein S4, X-linked	Undirected	STRING,IntNetDB
3820	KLRB1	killer cell lectin-like receptor subfamily B, member 1	6929	TCF3	transcription factor 3 (E2A immunoglobulin enhancer binding factors E12/E47)	Undirected	IntNetDB
6668	SP2	Sp2 transcription factor	3727	JUND	jun D proto-oncogene	TF->gene	TRANSFAC
2908	NR3C1	nuclear receptor subfamily 3, group C, member 1 (glucocorticoid receptor)	2353	FOS	v-fos FBJ murine osteosarcoma viral oncogene homolog	Undirected	STRING
hsa-miR-130a	hsa-miR-130a	hsa-miR-130a	6667	SP1	Sp1 transcription factor	miRNA->gene	TargetScan
hsa-miR-503	hsa-miR-503	hsa-miR-503	23025	UNC13A	unc-13 homolog A (C. elegans)	miRNA->gene	TargetScan
6777	STAT5B	signal transducer and activator of transcription 5B	84981	C17orf91	chromosome 17 open reading frame 91	TF->gene	TRANSFAC
708	C1QBP	complement component 1, q subcomponent binding protein	8531	CSDA	cold shock domain protein A	Undirected	IntNetDB
6668	SP2	Sp2 transcription factor	80774	LIMD2	LIM domain containing 2	TF->gene	TRANSFAC
hsa-miR-320b	hsa-miR-320b	hsa-miR-320b	25853	WDR40A	WD repeat domain 40A	miRNA->gene	TargetScan
hsa-miR-29c	hsa-miR-29c	hsa-miR-29c	23500	DAAM2	dishevelled associated activator of morphogenesis 2	miRNA->gene	TargetScan
4303	FOXO4	forkhead box O4	3039	HBA1	hemoglobin, alpha 1	TF->gene	TRANSFAC
4666	NACA	nascent polypeptide-associated complex alpha subunit	6143	RPL19	ribosomal protein L19	Undirected	IntNetDB
645	BLVRB	biliverdin reductase B (flavin reductase (NADPH))	669	BPGM	2,3-bisphosphoglycerate mutase	Undirected	IntNetDB
6777	STAT5B	signal transducer and activator of transcription 5B	966	CD59	CD59 molecule, complement regulatory protein	TF->gene	TRANSFAC
6670	SP3	Sp3 transcription factor	3042	HBM	hemoglobin, mu	TF->gene	TRANSFAC
3045	HBD	hemoglobin, delta	3048	HBG2	hemoglobin, gamma G	Undirected	IntNetDB
6929	TCF3	transcription factor 3 (E2A immunoglobulin enhancer binding factors E12/E47)	7277	TUBA4A	tubulin, alpha 4a	TF->gene	TRANSFAC
6670	SP3	Sp3 transcription factor	9208	LRRFIP1	leucine rich repeat (in FLII) interacting protein 1	Undirected	IntNetDB
hsa-miR-130a	hsa-miR-130a	hsa-miR-130a	55534	MAML3	mastermind-like 3 (Drosophila)	miRNA->gene	TargetScan
3684	ITGAM	integrin, alpha M (complement component 3 receptor 3 subunit)	9846	GAB2	GRB2-associated binding protein 2	Undirected	IntNetDB
6223	RPS19	ribosomal protein S19	11224	RPL35	ribosomal protein L35	Undirected	STRING,IntNetDB
4067	LYN	v-yes-1 Yamaguchi sarcoma viral related oncogene homolog	9846	GAB2	GRB2-associated binding protein 2	KEGG directed	KEGG
2219	FCN1	ficolin (collagen/fibrinogen domain containing) 1	3820	KLRB1	killer cell lectin-like receptor subfamily B, member 1	Undirected	IntNetDB
9045	RPL14	ribosomal protein L14	6189	RPS3A	ribosomal protein S3A	Undirected	STRING,IntNetDB
hsa-miR-301a	hsa-miR-301a	hsa-miR-301a	7111	TMOD1	tropomodulin 1	miRNA->gene	TargetScan
6256	RXRA	retinoid X receptor, alpha	54682	MANSC1	MANSC domain containing 1	TF->gene	TRANSFAC
hsa-miR-410	hsa-miR-410	hsa-miR-410	203228	C9orf72	chromosome 9 open reading frame 72	miRNA->gene	TargetScan
6256	RXRA	retinoid X receptor, alpha	9586	CREB5	cAMP responsive element binding protein 5	TF->gene	JASPAR
6160	RPL31	ribosomal protein L31	6125	RPL5	ribosomal protein L5	Undirected	STRING,IntNetDB
6160	RPL31	ribosomal protein L31	6124	RPL4	ribosomal protein L4	Undirected	STRING,IntNetDB
23762	OSBP2	oxysterol binding protein 2	665	BNIP3L	BCL2/adenovirus E1B 19kDa interacting protein 3-like	Undirected	IntNetDB
6047	RNF4	ring finger protein 4	23598	PATZ1	POZ (BTB) and AT hook containing zinc finger 1	Undirected	STRING
3172	HNF4A	hepatocyte nuclear factor 4, alpha	6809	STX3	syntaxin 3	TF->gene	TRANSFAC
1052	CEBPD	CCAAT/enhancer binding protein (C/EBP), delta	9586	CREB5	cAMP responsive element binding protein 5	TF->gene	TRANSFAC
hsa-miR-454	hsa-miR-454	hsa-miR-454	80774	LIMD2	LIM domain containing 2	miRNA->gene	TargetScan
1385	CREB1	cAMP responsive element binding protein 1	22794	CASC3	cancer susceptibility candidate 3	TF->gene	TRANSFAC
55437	ALS2CR2	amyotrophic lateral sclerosis 2 (juvenile) chromosome region, candidate 2	598	BCL2L1	BCL2-like 1	Undirected	IntNetDB
6929	TCF3	transcription factor 3 (E2A immunoglobulin enhancer binding factors E12/E47)	3002	GZMB	granzyme B (granzyme 2, cytotoxic T-lymphocyte-associated serine esterase 1)	TF->gene	TRANSFAC,JASPAR
1991	ELA2	elastase 2, neutrophil	3684	ITGAM	integrin, alpha M (complement component 3 receptor 3 subunit)	Undirected	STRING
6256	RXRA	retinoid X receptor, alpha	51001	MTERFD1	MTERF domain containing 1	TF->gene	TRANSFAC
6141	RPL18	ribosomal protein L18	9045	RPL14	ribosomal protein L14	Undirected	STRING,IntNetDB
1050	CEBPA	CCAAT/enhancer binding protein (C/EBP), alpha	6154	RPL26	ribosomal protein L26	TF->gene	TRANSFAC
5460	POU5F1	POU class 5 homeobox 1	282809	WDR51B	WD repeat domain 51B	TF->gene	TRANSFAC
hsa-miR-301a	hsa-miR-301a	hsa-miR-301a	84159	ARID5B	AT rich interactive domain 5B (MRF1-like)	miRNA->gene	TargetScan
10970	CKAP4	cytoskeleton-associated protein 4	5768	QSOX1	quiescin Q6 sulfhydryl oxidase 1	Undirected	IntNetDB
6929	TCF3	transcription factor 3 (E2A immunoglobulin enhancer binding factors E12/E47)	hsa-miR-33b	hsa-miR-33b	hsa-miR-33b	TF->miRNA	TRANSFAC
2219	FCN1	ficolin (collagen/fibrinogen domain containing) 1	3002	GZMB	granzyme B (granzyme 2, cytotoxic T-lymphocyte-associated serine esterase 1)	Undirected	IntNetDB
192134	B3GNT6	UDP-GlcNAc:betaGal beta-1,3-N-acetylglucosaminyltransferase 6 (core 3 synthase)	79623	GALNT14	UDP-N-acetyl-alpha-D-galactosamine:polypeptide N-acetylgalactosaminyltransferase 14 (GalNAc-T14)	KEGG directed	KEGG
6168	RPL37A	ribosomal protein L37a	6125	RPL5	ribosomal protein L5	Undirected	STRING,IntNetDB
6256	RXRA	retinoid X receptor, alpha	2358	FPRL1	formyl peptide receptor 2	TF->gene	JASPAR
6668	SP2	Sp2 transcription factor	389541	LOC389541	chromosome 7 open reading frame 59	TF->gene	TRANSFAC
2305	FOXM1	forkhead box M1	7027	TFDP1	transcription factor Dp-1	Undirected	IntNetDB
1593	CYP27A1	cytochrome P450, family 27, subfamily A, polypeptide 1	19	ABCA1	ATP-binding cassette, sub-family A (ABC1), member 1	Undirected	STRING
6223	RPS19	ribosomal protein S19	6125	RPL5	ribosomal protein L5	Undirected	STRING,IntNetDB
6223	RPS19	ribosomal protein S19	6124	RPL4	ribosomal protein L4	Undirected	STRING,IntNetDB
23598	PATZ1	POZ (BTB) and AT hook containing zinc finger 1	3221	HOXC4	homeobox C4	TF->gene	TRANSFAC
hsa-miR-320c	hsa-miR-320c	hsa-miR-320c	677	ZFP36L1	zinc finger protein 36, C3H type-like 1	miRNA->gene	TargetScan
1385	CREB1	cAMP responsive element binding protein 1	55803	CENTA2	centaurin, alpha 2	TF->gene	TRANSFAC,JASPAR
2649	NR6A1	nuclear receptor subfamily 6, group A, member 1	7691	ZNF132	zinc finger protein 132	TF->gene	TRANSFAC
6667	SP1	Sp1 transcription factor	353	APRT	adenine phosphoribosyltransferase	TF->gene	TRANSFAC
6929	TCF3	transcription factor 3 (E2A immunoglobulin enhancer binding factors E12/E47)	10476	ATP5H	ATP synthase, H+ transporting, mitochondrial F0 complex, subunit d	TF->gene	TRANSFAC
6256	RXRA	retinoid X receptor, alpha	54751	FBLIM1	filamin binding LIM protein 1	TF->gene	TRANSFAC
1870	E2F2	E2F transcription factor 2	400927	LOC400927	TPTE and PTEN homologous inositol lipid phosphatase pseudogene	TF->gene	TRANSFAC
4311	MME	membrane metallo-endopeptidase	4318	MMP9	matrix metallopeptidase 9 (gelatinase B, 92kDa gelatinase, 92kDa type IV collagenase)	Undirected	IntNetDB
645	BLVRB	biliverdin reductase B (flavin reductase (NADPH))	7027	TFDP1	transcription factor Dp-1	Undirected	IntNetDB
6136	RPL12	ribosomal protein L12	6191	RPS4X	ribosomal protein S4, X-linked	Undirected	IntNetDB
212	ALAS2	aminolevulinate, delta-, synthase 2	23762	OSBP2	oxysterol binding protein 2	Undirected	IntNetDB
5478	PPIA	peptidylprolyl isomerase A (cyclophilin A)	4318	MMP9	matrix metallopeptidase 9 (gelatinase B, 92kDa gelatinase, 92kDa type IV collagenase)	Undirected	STRING
10661	KLF1	Kruppel-like factor 1 (erythroid)	2996	GYPE	glycophorin E	Undirected	IntNetDB
10661	KLF1	Kruppel-like factor 1 (erythroid)	2995	GYPC	glycophorin C (Gerbich blood group)	Undirected	IntNetDB
6670	SP3	Sp3 transcription factor	54550	NECAB2	N-terminal EF-hand calcium binding protein 2	TF->gene	TRANSFAC
6670	SP3	Sp3 transcription factor	5610	EIF2AK2	eukaryotic translation initiation factor 2-alpha kinase 2	TF->gene	TRANSFAC
10578	GNLY	granulysin	5473	PPBP	pro-platelet basic protein (chemokine (C-X-C motif) ligand 7)	Undirected	IntNetDB
3482	IGF2R	insulin-like growth factor 2 receptor	8029	CUBN	cubilin (intrinsic factor-cobalamin receptor)	Undirected	STRING
6667	SP1	Sp1 transcription factor	23097	CDC2L6	cell division cycle 2-like 6 (CDK8-like)	TF->gene	TRANSFAC
3684	ITGAM	integrin, alpha M (complement component 3 receptor 3 subunit)	3820	KLRB1	killer cell lectin-like receptor subfamily B, member 1	Undirected	IntNetDB
6929	TCF3	transcription factor 3 (E2A immunoglobulin enhancer binding factors E12/E47)	55803	CENTA2	centaurin, alpha 2	TF->gene	TRANSFAC
hsa-miR-424	hsa-miR-424	hsa-miR-424	3759	KCNJ2	potassium inwardly-rectifying channel, subfamily J, member 2	miRNA->gene	TargetScan
2358	FPRL1	formyl peptide receptor 2	8875	VNN2	vanin 2	Undirected	IntNetDB
1544	CYP1A2	cytochrome P450, family 1, subfamily A, polypeptide 2	4051	CYP4F3	cytochrome P450, family 4, subfamily F, polypeptide 3	Undirected	IntNetDB
3172	HNF4A	hepatocyte nuclear factor 4, alpha	51218	GLRX5	glutaredoxin 5	TF->gene	TRANSFAC
6720	SREBF1	sterol regulatory element binding transcription factor 1	3482	IGF2R	insulin-like growth factor 2 receptor	TF->gene	TRANSFAC
hsa-miR-454	hsa-miR-454	hsa-miR-454	57568	SIPA1L2	signal-induced proliferation-associated 1 like 2	miRNA->gene	TargetScan
1933	EEF1B2	eukaryotic translation elongation factor 1 beta 2	6166	RPL36AL	ribosomal protein L36a-like	Undirected	IntNetDB
hsa-miR-320b	hsa-miR-320b	hsa-miR-320b	7165	TPD52L2	tumor protein D52-like 2	miRNA->gene	TargetScan
6668	SP2	Sp2 transcription factor	51547	SIRT7	sirtuin (silent mating type information regulation 2 homolog) 7 (S. cerevisiae)	TF->gene	TRANSFAC
6670	SP3	Sp3 transcription factor	9170	EDG4	lysophosphatidic acid receptor 2	TF->gene	TRANSFAC
6141	RPL18	ribosomal protein L18	8666	EIF3G	eukaryotic translation initiation factor 3, subunit G	Undirected	STRING,IntNetDB
10487	CAP1	CAP, adenylate cyclase-associated protein 1 (yeast)	60	ACTB	actin, beta	Undirected	IntNetDB
6929	TCF3	transcription factor 3 (E2A immunoglobulin enhancer binding factors E12/E47)	hsa-miR-629	hsa-miR-629	hsa-miR-629	TF->miRNA	TRANSFAC
hsa-miR-124	hsa-miR-124	hsa-miR-124	10602	CDC42EP3	CDC42 effector protein (Rho GTPase binding) 3	miRNA->gene	TargetScan
6668	SP2	Sp2 transcription factor	6647	SOD1	superoxide dismutase 1, soluble	TF->gene	TRANSFAC
571	BACH1	BTB and CNC homology 1, basic leucine zipper transcription factor 1	9334	B4GALT5	UDP-Gal:betaGlcNAc beta 1,4- galactosyltransferase, polypeptide 5	TF->gene	TRANSFAC
2038	EPB42	erythrocyte membrane protein band 4.2	2039	EPB49	erythrocyte membrane protein band 4.9 (dematin)	Undirected	IntNetDB
6137	RPL13	ribosomal protein L13	6189	RPS3A	ribosomal protein S3A	Undirected	STRING,IntNetDB
3727	JUND	jun D proto-oncogene	55803	CENTA2	centaurin, alpha 2	TF->gene	TRANSFAC
51218	GLRX5	glutaredoxin 5	7504	XK	X-linked Kx blood group (McLeod syndrome)	Undirected	IntNetDB
1052	CEBPD	CCAAT/enhancer binding protein (C/EBP), delta	115330	GPR146	G protein-coupled receptor 146	TF->gene	TRANSFAC
hsa-miR-33b	hsa-miR-33b	hsa-miR-33b	26507	CNNM1	cyclin M1	miRNA->gene	TargetScan
405	ARNT	aryl hydrocarbon receptor nuclear translocator	51024	FIS1	fission 1 (mitochondrial outer membrane) homolog (S. cerevisiae)	TF->gene	TRANSFAC
7314	UBB	ubiquitin B	6622	SNCA	synuclein, alpha (non A4 component of amyloid precursor)	Undirected	STRING
6668	SP2	Sp2 transcription factor	11224	RPL35	ribosomal protein L35	TF->gene	TRANSFAC
6141	RPL18	ribosomal protein L18	6124	RPL4	ribosomal protein L4	Undirected	STRING,IntNetDB
6141	RPL18	ribosomal protein L18	6125	RPL5	ribosomal protein L5	Undirected	STRING,IntNetDB
6722	SRF	serum response factor (c-fos serum response element-binding transcription factor)	998	CDC42	cell division cycle 42 (GTP binding protein, 25kDa)	Undirected	STRING
6670	SP3	Sp3 transcription factor	65095	KRI1	KRI1 homolog (S. cerevisiae)	TF->gene	TRANSFAC
10578	GNLY	granulysin	6279	S100A8	S100 calcium binding protein A8	Undirected	IntNetDB
hsa-miR-142-3p	hsa-miR-142-3p	hsa-miR-142-3p	8870	IER3	immediate early response 3	miRNA->gene	TargetScan
1385	CREB1	cAMP responsive element binding protein 1	116983	CENTB5	centaurin, beta 5	TF->gene	TRANSFAC
2039	EPB49	erythrocyte membrane protein band 4.9 (dematin)	4635	MYL4	myosin, light chain 4, alkali; atrial, embryonic	Undirected	IntNetDB
2623	GATA1	GATA binding protein 1 (globin transcription factor 1)	7027	TFDP1	transcription factor Dp-1	Undirected	IntNetDB
571	BACH1	BTB and CNC homology 1, basic leucine zipper transcription factor 1	201229	LOC201229	hypothetical protein LOC201229	TF->gene	TRANSFAC
2887	GRB10	growth factor receptor-bound protein 10	3002	GZMB	granzyme B (granzyme 2, cytotoxic T-lymphocyte-associated serine esterase 1)	Undirected	STRING
hsa-miR-454	hsa-miR-454	hsa-miR-454	94241	TP53INP1	tumor protein p53 inducible nuclear protein 1	miRNA->gene	TargetScan
hsa-miR-454	hsa-miR-454	hsa-miR-454	4603	MYBL1	v-myb myeloblastosis viral oncogene homolog (avian)-like 1	miRNA->gene	TargetScan
7060	THBS4	thrombospondin 4	8516	ITGA8	integrin, alpha 8	Undirected	STRING
4899	NRF1	nuclear respiratory factor 1	23625	FAM89B	family with sequence similarity 89, member B	TF->gene	TRANSFAC
7392	USF2	upstream transcription factor 2, c-fos interacting	2649	NR6A1	nuclear receptor subfamily 6, group A, member 1	TF->gene	TRANSFAC
6722	SRF	serum response factor (c-fos serum response element-binding transcription factor)	860	RUNX2	runt-related transcription factor 2	Undirected	STRING
6668	SP2	Sp2 transcription factor	11345	GABARAPL2	GABA(A) receptor-associated protein-like 2	TF->gene	TRANSFAC
11224	RPL35	ribosomal protein L35	1933	EEF1B2	eukaryotic translation elongation factor 1 beta 2	Undirected	IntNetDB
6670	SP3	Sp3 transcription factor	84681	HINT2	histidine triad nucleotide binding protein 2	TF->gene	TRANSFAC
7157	TP53	tumor protein p53	1847	DUSP5	dual specificity phosphatase 5	Undirected	STRING
6722	SRF	serum response factor (c-fos serum response element-binding transcription factor)	10487	CAP1	CAP, adenylate cyclase-associated protein 1 (yeast)	TF->gene	TRANSFAC
571	BACH1	BTB and CNC homology 1, basic leucine zipper transcription factor 1	11025	LILRB3	leukocyte immunoglobulin-like receptor, subfamily B (with TM and ITIM domains), member 3	TF->gene	TRANSFAC
hsa-miR-19b	hsa-miR-19b	hsa-miR-19b	140803	TRPM6	transient receptor potential cation channel, subfamily M, member 6	miRNA->gene	TargetScan
hsa-miR-424	hsa-miR-424	hsa-miR-424	51	ACOX1	acyl-Coenzyme A oxidase 1, palmitoyl	miRNA->gene	TargetScan
1051	CEBPB	CCAAT/enhancer binding protein (C/EBP), beta	100132417	LOC100132417	Fc fragment of IgG, high affinity Ic, receptor (CD64)	TF->gene	TRANSFAC
hsa-miR-410	hsa-miR-410	hsa-miR-410	6667	SP1	Sp1 transcription factor	miRNA->gene	TargetScan
hsa-miR-124	hsa-miR-124	hsa-miR-124	57189	KIAA1147	KIAA1147	miRNA->gene	TargetScan
9045	RPL14	ribosomal protein L14	6176	RPLP1	ribosomal protein, large, P1	Undirected	STRING,IntNetDB
25793	FBXO7	F-box protein 7	6521	SLC4A1	solute carrier family 4, anion exchanger, member 1 (erythrocyte membrane protein band 3, Diego blood group)	Undirected	IntNetDB
6668	SP2	Sp2 transcription factor	645	BLVRB	biliverdin reductase B (flavin reductase (NADPH))	TF->gene	TRANSFAC
57379	AICDA	activation-induced cytidine deaminase	6929	TCF3	transcription factor 3 (E2A immunoglobulin enhancer binding factors E12/E47)	Undirected	STRING
4899	NRF1	nuclear respiratory factor 1	7027	TFDP1	transcription factor Dp-1	TF->gene	TRANSFAC
hsa-miR-340	hsa-miR-340	hsa-miR-340	114991	ZNF618	zinc finger protein 618	miRNA->gene	TargetScan
6667	SP1	Sp1 transcription factor	9704	DHX34	DEAH (Asp-Glu-Ala-His) box polypeptide 34	TF->gene	TRANSFAC
2908	NR3C1	nuclear receptor subfamily 3, group C, member 1 (glucocorticoid receptor)	2305	FOXM1	forkhead box M1	Undirected	STRING
2887	GRB10	growth factor receptor-bound protein 10	3482	IGF2R	insulin-like growth factor 2 receptor	Undirected	STRING
hsa-miR-454	hsa-miR-454	hsa-miR-454	22924	MAPRE3	microtubule-associated protein, RP/EB family, member 3	miRNA->gene	TargetScan
25793	FBXO7	F-box protein 7	2995	GYPC	glycophorin C (Gerbich blood group)	Undirected	IntNetDB
hsa-miR-340	hsa-miR-340	hsa-miR-340	57568	SIPA1L2	signal-induced proliferation-associated 1 like 2	miRNA->gene	TargetScan
1998	ELF2	E74-like factor 2 (ets domain transcription factor)	10487	CAP1	CAP, adenylate cyclase-associated protein 1 (yeast)	TF->gene	TRANSFAC
1051	CEBPB	CCAAT/enhancer binding protein (C/EBP), beta	2353	FOS	v-fos FBJ murine osteosarcoma viral oncogene homolog	Undirected	IntNetDB
2996	GYPE	glycophorin E	4354	MPP1	membrane protein, palmitoylated 1, 55kDa	Undirected	IntNetDB
6668	SP2	Sp2 transcription factor	3042	HBM	hemoglobin, mu	TF->gene	TRANSFAC
hsa-miR-124	hsa-miR-124	hsa-miR-124	23186	RCOR1	REST corepressor 1	miRNA->gene	TargetScan
2353	FOS	v-fos FBJ murine osteosarcoma viral oncogene homolog	4318	MMP9	matrix metallopeptidase 9 (gelatinase B, 92kDa gelatinase, 92kDa type IV collagenase)	KEGG directed	KEGG
6720	SREBF1	sterol regulatory element binding transcription factor 1	339487	ZBTB8OS	zinc finger and BTB domain containing 8 opposite strand	TF->gene	TRANSFAC
200315	APOBEC3A	apolipoprotein B mRNA editing enzyme, catalytic polypeptide-like 3A	7462	LAT2	linker for activation of T cells family, member 2	Undirected	IntNetDB
1052	CEBPD	CCAAT/enhancer binding protein (C/EBP), delta	10174	SORBS3	sorbin and SH3 domain containing 3	TF->gene	TRANSFAC
4666	NACA	nascent polypeptide-associated complex alpha subunit	6155	RPL27	ribosomal protein L27	Undirected	IntNetDB
4666	NACA	nascent polypeptide-associated complex alpha subunit	6157	RPL27A	ribosomal protein L27a	Undirected	IntNetDB
4780	NFE2L2	nuclear factor (erythroid-derived 2)-like 2	4318	MMP9	matrix metallopeptidase 9 (gelatinase B, 92kDa gelatinase, 92kDa type IV collagenase)	TF->gene	TRANSFAC
2038	EPB42	erythrocyte membrane protein band 4.2	665	BNIP3L	BCL2/adenovirus E1B 19kDa interacting protein 3-like	Undirected	IntNetDB
4303	FOXO4	forkhead box O4	2919	CXCL1	chemokine (C-X-C motif) ligand 1 (melanoma growth stimulating activity, alpha)	TF->gene	TRANSFAC
5724	PTAFR	platelet-activating factor receptor	965	CD58	CD58 molecule	Undirected	IntNetDB
2597	GAPDH	glyceraldehyde-3-phosphate dehydrogenase	669	BPGM	2,3-bisphosphoglycerate mutase	KEGG directed	KEGG,STRING
1050	CEBPA	CCAAT/enhancer binding protein (C/EBP), alpha	hsa-miR-1308	hsa-miR-1308	hsa-miR-1308	TF->miRNA	TRANSFAC
7157	TP53	tumor protein p53	54682	MANSC1	MANSC domain containing 1	TF->gene	TRANSFAC
84159	ARID5B	AT rich interactive domain 5B (MRF1-like)	25797	QPCT	glutaminyl-peptide cyclotransferase	TF->gene	TRANSFAC
4482	MSRA	methionine sulfoxide reductase A	51218	GLRX5	glutaredoxin 5	Undirected	IntNetDB
hsa-miR-124	hsa-miR-124	hsa-miR-124	7165	TPD52L2	tumor protein D52-like 2	miRNA->gene	TargetScan
212	ALAS2	aminolevulinate, delta-, synthase 2	5498	PPOX	protoporphyrinogen oxidase	Undirected	IntNetDB
10578	GNLY	granulysin	8542	APOL1	apolipoprotein L, 1	Undirected	IntNetDB
6208	RPS14	ribosomal protein S14	6157	RPL27A	ribosomal protein L27a	Undirected	STRING,IntNetDB
hsa-miR-124	hsa-miR-124	hsa-miR-124	80774	LIMD2	LIM domain containing 2	miRNA->gene	TargetScan
1385	CREB1	cAMP responsive element binding protein 1	860	RUNX2	runt-related transcription factor 2	TF->gene	TRANSFAC
2919	CXCL1	chemokine (C-X-C motif) ligand 1 (melanoma growth stimulating activity, alpha)	4318	MMP9	matrix metallopeptidase 9 (gelatinase B, 92kDa gelatinase, 92kDa type IV collagenase)	Undirected	STRING
6670	SP3	Sp3 transcription factor	114804	RNF157	ring finger protein 157	TF->gene	TRANSFAC
25793	FBXO7	F-box protein 7	665	BNIP3L	BCL2/adenovirus E1B 19kDa interacting protein 3-like	Undirected	IntNetDB
220972	MARCH8	membrane-associated ring finger (C3HC4) 8	51218	GLRX5	glutaredoxin 5	Undirected	IntNetDB
9045	RPL14	ribosomal protein L14	6191	RPS4X	ribosomal protein S4, X-linked	Undirected	STRING,IntNetDB
hsa-miR-454	hsa-miR-454	hsa-miR-454	858	CAV2	caveolin 2	miRNA->gene	TargetScan
1054	CEBPG	CCAAT/enhancer binding protein (C/EBP), gamma	100129034	LOC100129034	hypothetical protein LOC100129034	TF->gene	TRANSFAC
103910	MRLC2	myosin regulatory light chain MRLC2	60	ACTB	actin, beta	KEGG directed	KEGG,STRING
6929	TCF3	transcription factor 3 (E2A immunoglobulin enhancer binding factors E12/E47)	2701	GJA4	gap junction protein, alpha 4, 37kDa	TF->gene	TRANSFAC
hsa-miR-320b	hsa-miR-320b	hsa-miR-320b	51571	FAM49B	family with sequence similarity 49, member B	miRNA->gene	TargetScan
115727	RASGRP4	RAS guanyl releasing protein 4	728	C5AR1	complement component 5a receptor 1	Undirected	IntNetDB
212	ALAS2	aminolevulinate, delta-, synthase 2	7504	XK	X-linked Kx blood group (McLeod syndrome)	Undirected	IntNetDB
84159	ARID5B	AT rich interactive domain 5B (MRF1-like)	338442	GPR109A	G protein-coupled receptor 109A	TF->gene	TRANSFAC
23569	PADI4	peptidyl arginine deiminase, type IV	25797	QPCT	glutaminyl-peptide cyclotransferase	Undirected	IntNetDB
6929	TCF3	transcription factor 3 (E2A immunoglobulin enhancer binding factors E12/E47)	10261	IGSF6	immunoglobulin superfamily, member 6	TF->gene	TRANSFAC
6929	TCF3	transcription factor 3 (E2A immunoglobulin enhancer binding factors E12/E47)	2039	EPB49	erythrocyte membrane protein band 4.9 (dematin)	TF->gene	TRANSFAC
7157	TP53	tumor protein p53	6223	RPS19	ribosomal protein S19	TF->gene	TRANSFAC
6667	SP1	Sp1 transcription factor	3042	HBM	hemoglobin, mu	TF->gene	TRANSFAC
6160	RPL31	ribosomal protein L31	6157	RPL27A	ribosomal protein L27a	Undirected	STRING,IntNetDB
6155	RPL27	ribosomal protein L27	6191	RPS4X	ribosomal protein S4, X-linked	Undirected	STRING,IntNetDB
2649	NR6A1	nuclear receptor subfamily 6, group A, member 1	477	ATP1A2	ATPase, Na+/K+ transporting, alpha 2 (+) polypeptide	TF->gene	TRANSFAC
571	BACH1	BTB and CNC homology 1, basic leucine zipper transcription factor 1	64581	CLEC7A	C-type lectin domain family 7, member A	TF->gene	TRANSFAC
6722	SRF	serum response factor (c-fos serum response element-binding transcription factor)	79583	FLJ22167	hypothetical protein FLJ22167	TF->gene	TRANSFAC
hsa-miR-320b	hsa-miR-320b	hsa-miR-320b	677	ZFP36L1	zinc finger protein 36, C3H type-like 1	miRNA->gene	TargetScan
7157	TP53	tumor protein p53	7027	TFDP1	transcription factor Dp-1	Undirected	STRING
5700	PSMC1	proteasome (prosome, macropain) 26S subunit, ATPase, 1	11065	UBE2C	ubiquitin-conjugating enzyme E2C	Undirected	STRING
1933	EEF1B2	eukaryotic translation elongation factor 1 beta 2	6124	RPL4	ribosomal protein L4	Undirected	IntNetDB
1933	EEF1B2	eukaryotic translation elongation factor 1 beta 2	6125	RPL5	ribosomal protein L5	Undirected	IntNetDB
51218	GLRX5	glutaredoxin 5	7001	PRDX2	peroxiredoxin 2	Undirected	IntNetDB
27232	GNMT	glycine N-methyltransferase	212	ALAS2	aminolevulinate, delta-, synthase 2	KEGG directed	KEGG,STRING
hsa-miR-340	hsa-miR-340	hsa-miR-340	9586	CREB5	cAMP responsive element binding protein 5	miRNA->gene	TargetScan
6143	RPL19	ribosomal protein L19	6125	RPL5	ribosomal protein L5	Undirected	STRING,IntNetDB
4780	NFE2L2	nuclear factor (erythroid-derived 2)-like 2	3930	LBR	lamin B receptor	TF->gene	TRANSFAC,JASPAR
2114	ETS2	v-ets erythroblastosis virus E26 oncogene homolog 2 (avian)	10487	CAP1	CAP, adenylate cyclase-associated protein 1 (yeast)	TF->gene	TRANSFAC
23509	POFUT1	protein O-fucosyltransferase 1	2872	MKNK2	MAP kinase interacting serine/threonine kinase 2	Undirected	IntNetDB
405	ARNT	aryl hydrocarbon receptor nuclear translocator	7178	TPT1	tumor protein, translationally-controlled 1	TF->gene	JASPAR
7392	USF2	upstream transcription factor 2, c-fos interacting	57019	CIAPIN1	cytokine induced apoptosis inhibitor 1	TF->gene	TRANSFAC
2908	NR3C1	nuclear receptor subfamily 3, group C, member 1 (glucocorticoid receptor)	3042	HBM	hemoglobin, mu	TF->gene	TRANSFAC
6223	RPS19	ribosomal protein S19	6157	RPL27A	ribosomal protein L27a	Undirected	STRING,IntNetDB
6223	RPS19	ribosomal protein S19	6155	RPL27	ribosomal protein L27	Undirected	STRING,IntNetDB
7431	VIM	vimentin	4311	MME	membrane metallo-endopeptidase	Undirected	STRING
29997	GLTSCR2	glioma tumor suppressor candidate region gene 2	65095	KRI1	KRI1 homolog (S. cerevisiae)	Undirected	IntNetDB
2180	ACSL1	acyl-CoA synthetase long-chain family member 1	3684	ITGAM	integrin, alpha M (complement component 3 receptor 3 subunit)	Undirected	IntNetDB
1052	CEBPD	CCAAT/enhancer binding protein (C/EBP), delta	143686	SESN3	sestrin 3	TF->gene	TRANSFAC
5901	RAN	RAN, member RAS oncogene family	6728	SRP19	signal recognition particle 19kDa	Undirected	IntNetDB
6668	SP2	Sp2 transcription factor	9704	DHX34	DEAH (Asp-Glu-Ala-His) box polypeptide 34	TF->gene	TRANSFAC
11224	RPL35	ribosomal protein L35	6154	RPL26	ribosomal protein L26	Undirected	IntNetDB
5460	POU5F1	POU class 5 homeobox 1	3727	JUND	jun D proto-oncogene	TF->gene	TRANSFAC
11224	RPL35	ribosomal protein L35	6157	RPL27A	ribosomal protein L27a	Undirected	STRING,IntNetDB
hsa-miR-340	hsa-miR-340	hsa-miR-340	6929	TCF3	transcription factor 3 (E2A immunoglobulin enhancer binding factors E12/E47)	miRNA->gene	TargetScan
10661	KLF1	Kruppel-like factor 1 (erythroid)	25793	FBXO7	F-box protein 7	Undirected	IntNetDB
6668	SP2	Sp2 transcription factor	6238	RRBP1	ribosome binding protein 1 homolog 180kDa (dog)	TF->gene	TRANSFAC
115727	RASGRP4	RAS guanyl releasing protein 4	9732	DOCK4	dedicator of cytokinesis 4	Undirected	IntNetDB
hsa-miR-124	hsa-miR-124	hsa-miR-124	7431	VIM	vimentin	miRNA->gene	TargetScan
7431	VIM	vimentin	7039	TGFA	transforming growth factor, alpha	Undirected	STRING
6929	TCF3	transcription factor 3 (E2A immunoglobulin enhancer binding factors E12/E47)	79154	MGC4172	short-chain dehydrogenase/reductase	TF->gene	TRANSFAC
314	AOC2	amine oxidase, copper containing 2 (retina-specific)	6653	SORL1	sortilin-related receptor, L(DLR class) A repeats-containing	Undirected	IntNetDB
1511	CTSG	cathepsin G	1669	DEFA4	defensin, alpha 4, corticostatin	Undirected	IntNetDB
25793	FBXO7	F-box protein 7	2996	GYPE	glycophorin E	Undirected	IntNetDB
3727	JUND	jun D proto-oncogene	80896	NPL	N-acetylneuraminate pyruvate lyase (dihydrodipicolinate synthase)	TF->gene	TRANSFAC
2114	ETS2	v-ets erythroblastosis virus E26 oncogene homolog 2 (avian)	55796	MBNL3	muscleblind-like 3 (Drosophila)	TF->gene	TRANSFAC
7001	PRDX2	peroxiredoxin 2	5478	PPIA	peptidylprolyl isomerase A (cyclophilin A)	Undirected	STRING
hsa-miR-33a	hsa-miR-33a	hsa-miR-33a	84159	ARID5B	AT rich interactive domain 5B (MRF1-like)	miRNA->gene	TargetScan
6773	STAT2	signal transducer and activator of transcription 2, 113kDa	5610	EIF2AK2	eukaryotic translation initiation factor 2-alpha kinase 2	Undirected	STRING
6160	RPL31	ribosomal protein L31	6208	RPS14	ribosomal protein S14	Undirected	STRING,IntNetDB
6668	SP2	Sp2 transcription factor	51571	FAM49B	family with sequence similarity 49, member B	TF->gene	TRANSFAC
6160	RPL31	ribosomal protein L31	6205	RPS11	ribosomal protein S11	Undirected	STRING,IntNetDB
6160	RPL31	ribosomal protein L31	6203	RPS9	ribosomal protein S9	Undirected	STRING,IntNetDB
8666	EIF3G	eukaryotic translation initiation factor 3, subunit G	6155	RPL27	ribosomal protein L27	Undirected	STRING,IntNetDB
1050	CEBPA	CCAAT/enhancer binding protein (C/EBP), alpha	159162	RBMY2FP	RNA binding motif protein, Y-linked, family 2, member F pseudogene	TF->gene	TRANSFAC
6667	SP1	Sp1 transcription factor	56996	SLC12A9	solute carrier family 12 (potassium/chloride transporters), member 9	TF->gene	TRANSFAC
7320	UBE2B	ubiquitin-conjugating enzyme E2B (RAD6 homolog)	997	CDC34	cell division cycle 34 homolog (S. cerevisiae)	Undirected	IntNetDB
6670	SP3	Sp3 transcription factor	79583	FLJ22167	hypothetical protein FLJ22167	TF->gene	TRANSFAC
6667	SP1	Sp1 transcription factor	65981	CAPRIN2	caprin family member 2	TF->gene	TRANSFAC
23598	PATZ1	POZ (BTB) and AT hook containing zinc finger 1	637	BID	BH3 interacting domain death agonist	TF->gene	TRANSFAC
7157	TP53	tumor protein p53	598	BCL2L1	BCL2-like 1	Undirected	STRING,IntNetDB
hsa-miR-320d	hsa-miR-320d	hsa-miR-320d	25853	WDR40A	WD repeat domain 40A	miRNA->gene	TargetScan
6667	SP1	Sp1 transcription factor	8460	TPST1	tyrosylprotein sulfotransferase 1	TF->gene	TRANSFAC
2995	GYPC	glycophorin C (Gerbich blood group)	8991	SELENBP1	selenium binding protein 1	Undirected	IntNetDB
6668	SP2	Sp2 transcription factor	22924	MAPRE3	microtubule-associated protein, RP/EB family, member 3	TF->gene	TRANSFAC
314	AOC2	amine oxidase, copper containing 2 (retina-specific)	6722	SRF	serum response factor (c-fos serum response element-binding transcription factor)	Undirected	STRING
6141	RPL18	ribosomal protein L18	6137	RPL13	ribosomal protein L13	Undirected	STRING,IntNetDB
6722	SRF	serum response factor (c-fos serum response element-binding transcription factor)	54751	FBLIM1	filamin binding LIM protein 1	TF->gene	TRANSFAC
hsa-miR-124	hsa-miR-124	hsa-miR-124	677	ZFP36L1	zinc finger protein 36, C3H type-like 1	miRNA->gene	TargetScan
hsa-miR-301a	hsa-miR-301a	hsa-miR-301a	2180	ACSL1	acyl-CoA synthetase long-chain family member 1	miRNA->gene	TargetScan
hsa-miR-424	hsa-miR-424	hsa-miR-424	6929	TCF3	transcription factor 3 (E2A immunoglobulin enhancer binding factors E12/E47)	miRNA->gene	TargetScan
6720	SREBF1	sterol regulatory element binding transcription factor 1	6047	RNF4	ring finger protein 4	TF->gene	TRANSFAC
6668	SP2	Sp2 transcription factor	79583	FLJ22167	hypothetical protein FLJ22167	TF->gene	TRANSFAC
hsa-miR-320c	hsa-miR-320c	hsa-miR-320c	7165	TPD52L2	tumor protein D52-like 2	miRNA->gene	TargetScan
1998	ELF2	E74-like factor 2 (ets domain transcription factor)	6777	STAT5B	signal transducer and activator of transcription 5B	TF->gene	TRANSFAC
1052	CEBPD	CCAAT/enhancer binding protein (C/EBP), delta	6102	RP2	retinitis pigmentosa 2 (X-linked recessive)	TF->gene	TRANSFAC
6929	TCF3	transcription factor 3 (E2A immunoglobulin enhancer binding factors E12/E47)	115330	GPR146	G protein-coupled receptor 146	TF->gene	TRANSFAC
1050	CEBPA	CCAAT/enhancer binding protein (C/EBP), alpha	3043	HBB	hemoglobin, beta	TF->gene	TRANSFAC
1050	CEBPA	CCAAT/enhancer binding protein (C/EBP), alpha	3048	HBG2	hemoglobin, gamma G	TF->gene	TRANSFAC
3684	ITGAM	integrin, alpha M (complement component 3 receptor 3 subunit)	728	C5AR1	complement component 5a receptor 1	Undirected	STRING
hsa-miR-124	hsa-miR-124	hsa-miR-124	91663	MYADM	myeloid-associated differentiation marker	miRNA->gene	TargetScan
80833	APOL3	apolipoprotein L, 3	8542	APOL1	apolipoprotein L, 1	Undirected	IntNetDB
6929	TCF3	transcription factor 3 (E2A immunoglobulin enhancer binding factors E12/E47)	55748	CNDP2	CNDP dipeptidase 2 (metallopeptidase M20 family)	TF->gene	TRANSFAC
1870	E2F2	E2F transcription factor 2	665	BNIP3L	BCL2/adenovirus E1B 19kDa interacting protein 3-like	Undirected	IntNetDB
7157	TP53	tumor protein p53	1854	DUT	deoxyuridine triphosphatase	Undirected	STRING
7157	TP53	tumor protein p53	51547	SIRT7	sirtuin (silent mating type information regulation 2 homolog) 7 (S. cerevisiae)	Undirected	STRING
2996	GYPE	glycophorin E	7504	XK	X-linked Kx blood group (McLeod syndrome)	Undirected	IntNetDB
2109	ETFB	electron-transfer-flavoprotein, beta polypeptide	6653	SORL1	sortilin-related receptor, L(DLR class) A repeats-containing	Undirected	IntNetDB
10261	IGSF6	immunoglobulin superfamily, member 6	6653	SORL1	sortilin-related receptor, L(DLR class) A repeats-containing	Undirected	IntNetDB
23598	PATZ1	POZ (BTB) and AT hook containing zinc finger 1	100129250	LOC100129250	similar to hCG1811779	TF->gene	TRANSFAC
6929	TCF3	transcription factor 3 (E2A immunoglobulin enhancer binding factors E12/E47)	2185	PTK2B	PTK2B protein tyrosine kinase 2 beta	TF->gene	TRANSFAC
7157	TP53	tumor protein p53	85462	FHDC1	FH2 domain containing 1	TF->gene	TRANSFAC
hsa-miR-340	hsa-miR-340	hsa-miR-340	25853	WDR40A	WD repeat domain 40A	miRNA->gene	TargetScan
hsa-miR-301a	hsa-miR-301a	hsa-miR-301a	2887	GRB10	growth factor receptor-bound protein 10	miRNA->gene	TargetScan
1052	CEBPD	CCAAT/enhancer binding protein (C/EBP), delta	3820	KLRB1	killer cell lectin-like receptor subfamily B, member 1	Undirected	IntNetDB
6667	SP1	Sp1 transcription factor	9732	DOCK4	dedicator of cytokinesis 4	TF->gene	TRANSFAC
11065	UBE2C	ubiquitin-conjugating enzyme E2C	2305	FOXM1	forkhead box M1	Undirected	IntNetDB
1051	CEBPB	CCAAT/enhancer binding protein (C/EBP), beta	92799	SHKBP1	SH3KBP1 binding protein 1	TF->gene	TRANSFAC
6137	RPL13	ribosomal protein L13	6157	RPL27A	ribosomal protein L27a	Undirected	STRING,IntNetDB
7178	TPT1	tumor protein, translationally-controlled 1	598	BCL2L1	BCL2-like 1	Undirected	STRING
hsa-miR-19b	hsa-miR-19b	hsa-miR-19b	3554	IL1R1	interleukin 1 receptor, type I	miRNA->gene	TargetScan
6668	SP2	Sp2 transcription factor	112398	EGLN2	egl nine homolog 2 (C. elegans)	TF->gene	TRANSFAC
3727	JUND	jun D proto-oncogene	2353	FOS	v-fos FBJ murine osteosarcoma viral oncogene homolog	Undirected	STRING,IntNetDB
571	BACH1	BTB and CNC homology 1, basic leucine zipper transcription factor 1	10562	OLFM4	olfactomedin 4	TF->gene	TRANSFAC
860	RUNX2	runt-related transcription factor 2	84898	PLXDC2	plexin domain containing 2	TF->gene	TRANSFAC
200315	APOBEC3A	apolipoprotein B mRNA editing enzyme, catalytic polypeptide-like 3A	55803	CENTA2	centaurin, alpha 2	Undirected	IntNetDB
4051	CYP4F3	cytochrome P450, family 4, subfamily F, polypeptide 3	26279	PLA2G2D	phospholipase A2, group IID	KEGG directed	KEGG,STRING
50807	DDEF1	development and differentiation enhancing factor 1	55803	CENTA2	centaurin, alpha 2	Undirected	IntNetDB
4807	NHLH1	nescient helix loop helix 1	2039	EPB49	erythrocyte membrane protein band 4.9 (dematin)	TF->gene	TRANSFAC
4666	NACA	nascent polypeptide-associated complex alpha subunit	6160	RPL31	ribosomal protein L31	Undirected	IntNetDB
4666	NACA	nascent polypeptide-associated complex alpha subunit	6161	RPL32	ribosomal protein L32	Undirected	IntNetDB
10261	IGSF6	immunoglobulin superfamily, member 6	11025	LILRB3	leukocyte immunoglobulin-like receptor, subfamily B (with TM and ITIM domains), member 3	Undirected	IntNetDB
4780	NFE2L2	nuclear factor (erythroid-derived 2)-like 2	9170	EDG4	lysophosphatidic acid receptor 2	TF->gene	TRANSFAC,JASPAR
4666	NACA	nascent polypeptide-associated complex alpha subunit	6166	RPL36AL	ribosomal protein L36a-like	Undirected	IntNetDB
4780	NFE2L2	nuclear factor (erythroid-derived 2)-like 2	84002	B3GNT5	UDP-GlcNAc:betaGal beta-1,3-N-acetylglucosaminyltransferase 5	TF->gene	TRANSFAC
hsa-miR-32	hsa-miR-32	hsa-miR-32	51	ACOX1	acyl-Coenzyme A oxidase 1, palmitoyl	miRNA->gene	TargetScan
6777	STAT5B	signal transducer and activator of transcription 5B	hsa-miR-629	hsa-miR-629	hsa-miR-629	TF->miRNA	TRANSFAC
55544	RBM38	RNA binding motif protein 38	9086	EIF1AY	eukaryotic translation initiation factor 1A, Y-linked	Undirected	IntNetDB
1870	E2F2	E2F transcription factor 2	2305	FOXM1	forkhead box M1	TF->gene	TRANSFAC
1051	CEBPB	CCAAT/enhancer binding protein (C/EBP), beta	55437	ALS2CR2	amyotrophic lateral sclerosis 2 (juvenile) chromosome region, candidate 2	Undirected	IntNetDB
6161	RPL32	ribosomal protein L32	6166	RPL36AL	ribosomal protein L36a-like	Undirected	IntNetDB
6136	RPL12	ribosomal protein L12	6189	RPS3A	ribosomal protein S3A	Undirected	IntNetDB
129642	MBOAT2	membrane bound O-acyltransferase domain containing 2	84803	AGPAT9	1-acylglycerol-3-phosphate O-acyltransferase 9	KEGG directed	KEGG
1350	COX7C	cytochrome c oxidase subunit VIIc	4707	NDUFB1	NADH dehydrogenase (ubiquinone) 1 beta subcomplex, 1, 7kDa	Undirected	IntNetDB
6161	RPL32	ribosomal protein L32	6168	RPL37A	ribosomal protein L37a	Undirected	STRING,IntNetDB
6208	RPS14	ribosomal protein S14	6124	RPL4	ribosomal protein L4	Undirected	STRING,IntNetDB
6208	RPS14	ribosomal protein S14	6125	RPL5	ribosomal protein L5	Undirected	STRING,IntNetDB
hsa-miR-340	hsa-miR-340	hsa-miR-340	23463	ICMT	isoprenylcysteine carboxyl methyltransferase	miRNA->gene	TargetScan
2908	NR3C1	nuclear receptor subfamily 3, group C, member 1 (glucocorticoid receptor)	159162	RBMY2FP	RNA binding motif protein, Y-linked, family 2, member F pseudogene	TF->gene	TRANSFAC
212	ALAS2	aminolevulinate, delta-, synthase 2	8991	SELENBP1	selenium binding protein 1	Undirected	IntNetDB
6157	RPL27A	ribosomal protein L27a	6191	RPS4X	ribosomal protein S4, X-linked	Undirected	STRING,IntNetDB
2908	NR3C1	nuclear receptor subfamily 3, group C, member 1 (glucocorticoid receptor)	10487	CAP1	CAP, adenylate cyclase-associated protein 1 (yeast)	TF->gene	TRANSFAC
1051	CEBPB	CCAAT/enhancer binding protein (C/EBP), beta	1052	CEBPD	CCAAT/enhancer binding protein (C/EBP), delta	Undirected	IntNetDB
1051	CEBPB	CCAAT/enhancer binding protein (C/EBP), beta	1054	CEBPG	CCAAT/enhancer binding protein (C/EBP), gamma	Undirected	IntNetDB
6667	SP1	Sp1 transcription factor	6888	TALDO1	transaldolase 1	TF->gene	TRANSFAC
4303	FOXO4	forkhead box O4	11081	KERA	keratocan	TF->gene	TRANSFAC
6166	RPL36AL	ribosomal protein L36a-like	6728	SRP19	signal recognition particle 19kDa	Undirected	IntNetDB
1991	ELA2	elastase 2, neutrophil	2358	FPRL1	formyl peptide receptor 2	Undirected	STRING
1991	ELA2	elastase 2, neutrophil	7157	TP53	tumor protein p53	Undirected	STRING
7157	TP53	tumor protein p53	7320	UBE2B	ubiquitin-conjugating enzyme E2B (RAD6 homolog)	TF->gene	TRANSFAC
6155	RPL27	ribosomal protein L27	6189	RPS3A	ribosomal protein S3A	Undirected	STRING,IntNetDB
6374	CXCL5	chemokine (C-X-C motif) ligand 5	4318	MMP9	matrix metallopeptidase 9 (gelatinase B, 92kDa gelatinase, 92kDa type IV collagenase)	Undirected	STRING
6124	RPL4	ribosomal protein L4	6728	SRP19	signal recognition particle 19kDa	Undirected	IntNetDB
2766	GMPR	guanosine monophosphate reductase	353	APRT	adenine phosphoribosyltransferase	KEGG directed	KEGG
6137	RPL13	ribosomal protein L13	9045	RPL14	ribosomal protein L14	Undirected	STRING,IntNetDB
317781	DDX51	DEAD (Asp-Glu-Ala-Asp) box polypeptide 51	6728	SRP19	signal recognition particle 19kDa	Undirected	IntNetDB
6929	TCF3	transcription factor 3 (E2A immunoglobulin enhancer binding factors E12/E47)	10677	AVIL	advillin	TF->gene	TRANSFAC
860	RUNX2	runt-related transcription factor 2	6773	STAT2	signal transducer and activator of transcription 2, 113kDa	TF->gene	TRANSFAC
1933	EEF1B2	eukaryotic translation elongation factor 1 beta 2	6136	RPL12	ribosomal protein L12	Undirected	IntNetDB
1933	EEF1B2	eukaryotic translation elongation factor 1 beta 2	6133	RPL9	ribosomal protein L9	Undirected	IntNetDB
6929	TCF3	transcription factor 3 (E2A immunoglobulin enhancer binding factors E12/E47)	6728	SRP19	signal recognition particle 19kDa	TF->gene	TRANSFAC
7392	USF2	upstream transcription factor 2, c-fos interacting	2039	EPB49	erythrocyte membrane protein band 4.9 (dematin)	TF->gene	TRANSFAC
6929	TCF3	transcription factor 3 (E2A immunoglobulin enhancer binding factors E12/E47)	6720	SREBF1	sterol regulatory element binding transcription factor 1	TF->gene	TRANSFAC
6670	SP3	Sp3 transcription factor	3930	LBR	lamin B receptor	TF->gene	TRANSFAC
23433	RHOQ	ras homolog gene family, member Q	998	CDC42	cell division cycle 42 (GTP binding protein, 25kDa)	Undirected	STRING
383	ARG1	arginase, liver	669	BPGM	2,3-bisphosphoglycerate mutase	Undirected	IntNetDB
405	ARNT	aryl hydrocarbon receptor nuclear translocator	7167	TPI1	triosephosphate isomerase 1	TF->gene	TRANSFAC
6670	SP3	Sp3 transcription factor	389541	LOC389541	chromosome 7 open reading frame 59	TF->gene	TRANSFAC
6667	SP1	Sp1 transcription factor	22898	DENND3	DENN/MADD domain containing 3	TF->gene	TRANSFAC
hsa-miR-33b	hsa-miR-33b	hsa-miR-33b	57719	TMEM16H	anoctamin 8	miRNA->gene	TargetScan
6223	RPS19	ribosomal protein S19	6143	RPL19	ribosomal protein L19	Undirected	STRING,IntNetDB
6929	TCF3	transcription factor 3 (E2A immunoglobulin enhancer binding factors E12/E47)	401563	C9orf139	chromosome 9 open reading frame 139	TF->gene	TRANSFAC
6670	SP3	Sp3 transcription factor	11345	GABARAPL2	GABA(A) receptor-associated protein-like 2	TF->gene	TRANSFAC
6143	RPL19	ribosomal protein L19	11224	RPL35	ribosomal protein L35	Undirected	STRING,IntNetDB
hsa-miR-124	hsa-miR-124	hsa-miR-124	94241	TP53INP1	tumor protein p53 inducible nuclear protein 1	miRNA->gene	TargetScan
1385	CREB1	cAMP responsive element binding protein 1	6124	RPL4	ribosomal protein L4	TF->gene	TRANSFAC
7027	TFDP1	transcription factor Dp-1	5111	PCNA	proliferating cell nuclear antigen	Undirected	STRING,IntNetDB
3684	ITGAM	integrin, alpha M (complement component 3 receptor 3 subunit)	64581	CLEC7A	C-type lectin domain family 7, member A	Undirected	IntNetDB
55629	PNRC2	proline-rich nuclear receptor coactivator 2	6166	RPL36AL	ribosomal protein L36a-like	Undirected	IntNetDB
6670	SP3	Sp3 transcription factor	9086	EIF1AY	eukaryotic translation initiation factor 1A, Y-linked	TF->gene	TRANSFAC
1998	ELF2	E74-like factor 2 (ets domain transcription factor)	728642	CDC2L2	cell division cycle 2-like 2 (PITSLRE proteins)	TF->gene	TRANSFAC
1933	EEF1B2	eukaryotic translation elongation factor 1 beta 2	6223	RPS19	ribosomal protein S19	Undirected	IntNetDB
2649	NR6A1	nuclear receptor subfamily 6, group A, member 1	7431	VIM	vimentin	TF->gene	TRANSFAC
6154	RPL26	ribosomal protein L26	65008	MRPL1	mitochondrial ribosomal protein L1	Undirected	IntNetDB
1051	CEBPB	CCAAT/enhancer binding protein (C/EBP), beta	4780	NFE2L2	nuclear factor (erythroid-derived 2)-like 2	TF->gene	TRANSFAC
220972	MARCH8	membrane-associated ring finger (C3HC4) 8	997	CDC34	cell division cycle 34 homolog (S. cerevisiae)	Undirected	IntNetDB
2358	FPRL1	formyl peptide receptor 2	2305	FOXM1	forkhead box M1	Undirected	STRING
637	BID	BH3 interacting domain death agonist	837	CASP4	caspase 4, apoptosis-related cysteine peptidase	Undirected	IntNetDB
5460	POU5F1	POU class 5 homeobox 1	4067	LYN	v-yes-1 Yamaguchi sarcoma viral related oncogene homolog	TF->gene	TRANSFAC
11224	RPL35	ribosomal protein L35	6160	RPL31	ribosomal protein L31	Undirected	STRING,IntNetDB
3172	HNF4A	hepatocyte nuclear factor 4, alpha	997	CDC34	cell division cycle 34 homolog (S. cerevisiae)	TF->gene	TRANSFAC
11224	RPL35	ribosomal protein L35	6169	RPL38	ribosomal protein L38	Undirected	STRING,IntNetDB
11224	RPL35	ribosomal protein L35	6168	RPL37A	ribosomal protein L37a	Undirected	STRING,IntNetDB
6521	SLC4A1	solute carrier family 4, anion exchanger, member 1 (erythrocyte membrane protein band 3, Diego blood group)	665	BNIP3L	BCL2/adenovirus E1B 19kDa interacting protein 3-like	Undirected	IntNetDB
1088	CEACAM8	carcinoembryonic antigen-related cell adhesion molecule 8	1991	ELA2	elastase 2, neutrophil	Undirected	IntNetDB
hsa-miR-320d	hsa-miR-320d	hsa-miR-320d	6256	RXRA	retinoid X receptor, alpha	miRNA->gene	TargetScan
4780	NFE2L2	nuclear factor (erythroid-derived 2)-like 2	1998	ELF2	E74-like factor 2 (ets domain transcription factor)	TF->gene	JASPAR
3727	JUND	jun D proto-oncogene	122953	JUNDM2	Jun dimerization protein 2	Undirected	STRING
25793	FBXO7	F-box protein 7	8991	SELENBP1	selenium binding protein 1	Undirected	IntNetDB
405	ARNT	aryl hydrocarbon receptor nuclear translocator	56905	C15orf39	chromosome 15 open reading frame 39	TF->gene	TRANSFAC
2908	NR3C1	nuclear receptor subfamily 3, group C, member 1 (glucocorticoid receptor)	2701	GJA4	gap junction protein, alpha 4, 37kDa	TF->gene	TRANSFAC
hsa-miR-454	hsa-miR-454	hsa-miR-454	7039	TGFA	transforming growth factor, alpha	miRNA->gene	TargetScan
1998	ELF2	E74-like factor 2 (ets domain transcription factor)	7169	TPM2	tropomyosin 2 (beta)	TF->gene	TRANSFAC
hsa-miR-124	hsa-miR-124	hsa-miR-124	114991	ZNF618	zinc finger protein 618	miRNA->gene	TargetScan
6205	RPS11	ribosomal protein S11	9045	RPL14	ribosomal protein L14	Undirected	STRING,IntNetDB
8666	EIF3G	eukaryotic translation initiation factor 3, subunit G	6169	RPL38	ribosomal protein L38	Undirected	STRING,IntNetDB
6521	SLC4A1	solute carrier family 4, anion exchanger, member 1 (erythrocyte membrane protein band 3, Diego blood group)	2038	EPB42	erythrocyte membrane protein band 4.2	Undirected	STRING,IntNetDB
8666	EIF3G	eukaryotic translation initiation factor 3, subunit G	6161	RPL32	ribosomal protein L32	Undirected	STRING,IntNetDB
1051	CEBPB	CCAAT/enhancer binding protein (C/EBP), beta	10261	IGSF6	immunoglobulin superfamily, member 6	TF->gene	TRANSFAC
6203	RPS9	ribosomal protein S9	6728	SRP19	signal recognition particle 19kDa	Undirected	IntNetDB
10578	GNLY	granulysin	3002	GZMB	granzyme B (granzyme 2, cytotoxic T-lymphocyte-associated serine esterase 1)	Undirected	STRING
2649	NR6A1	nuclear receptor subfamily 6, group A, member 1	2701	GJA4	gap junction protein, alpha 4, 37kDa	TF->gene	TRANSFAC
6668	SP2	Sp2 transcription factor	6888	TALDO1	transaldolase 1	TF->gene	TRANSFAC
6929	TCF3	transcription factor 3 (E2A immunoglobulin enhancer binding factors E12/E47)	94241	TP53INP1	tumor protein p53 inducible nuclear protein 1	TF->gene	TRANSFAC
2649	NR6A1	nuclear receptor subfamily 6, group A, member 1	64981	MRPL34	mitochondrial ribosomal protein L34	TF->gene	TRANSFAC
6668	SP2	Sp2 transcription factor	1032	CDKN2D	cyclin-dependent kinase inhibitor 2D (p19, inhibits CDK4)	TF->gene	TRANSFAC
6670	SP3	Sp3 transcription factor	22924	MAPRE3	microtubule-associated protein, RP/EB family, member 3	TF->gene	TRANSFAC
9128	PRPF4	PRP4 pre-mRNA processing factor 4 homolog (yeast)	3191	HNRNPL	heterogeneous nuclear ribonucleoprotein L	Undirected	STRING
26507	CNNM1	cyclin M1	7167	TPI1	triosephosphate isomerase 1	Undirected	IntNetDB
6929	TCF3	transcription factor 3 (E2A immunoglobulin enhancer binding factors E12/E47)	6722	SRF	serum response factor (c-fos serum response element-binding transcription factor)	Undirected	STRING
2623	GATA1	GATA binding protein 1 (globin transcription factor 1)	100129250	LOC100129250	similar to hCG1811779	TF->gene	TRANSFAC
hsa-miR-130a	hsa-miR-130a	hsa-miR-130a	22924	MAPRE3	microtubule-associated protein, RP/EB family, member 3	miRNA->gene	TargetScan
6667	SP1	Sp1 transcription factor	2872	MKNK2	MAP kinase interacting serine/threonine kinase 2	TF->gene	TRANSFAC
728	C5AR1	complement component 5a receptor 1	978	CDA	cytidine deaminase	Undirected	IntNetDB
2623	GATA1	GATA binding protein 1 (globin transcription factor 1)	5591	PRKDC	protein kinase, DNA-activated, catalytic polypeptide	TF->gene	TRANSFAC
3043	HBB	hemoglobin, beta	51327	ERAF	erythroid associated factor	Undirected	IntNetDB
6668	SP2	Sp2 transcription factor	79862	ZNF669	zinc finger protein 669	TF->gene	TRANSFAC
7001	PRDX2	peroxiredoxin 2	8991	SELENBP1	selenium binding protein 1	Undirected	IntNetDB
6777	STAT5B	signal transducer and activator of transcription 5B	2219	FCN1	ficolin (collagen/fibrinogen domain containing) 1	TF->gene	TRANSFAC
hsa-miR-223	hsa-miR-223	hsa-miR-223	3930	LBR	lamin B receptor	miRNA->gene	PicTar
6205	RPS11	ribosomal protein S11	6137	RPL13	ribosomal protein L13	Undirected	STRING,IntNetDB
6929	TCF3	transcription factor 3 (E2A immunoglobulin enhancer binding factors E12/E47)	837	CASP4	caspase 4, apoptosis-related cysteine peptidase	TF->gene	TRANSFAC
2919	CXCL1	chemokine (C-X-C motif) ligand 1 (melanoma growth stimulating activity, alpha)	6374	CXCL5	chemokine (C-X-C motif) ligand 5	Undirected	IntNetDB
6929	TCF3	transcription factor 3 (E2A immunoglobulin enhancer binding factors E12/E47)	203228	C9orf72	chromosome 9 open reading frame 72	TF->gene	TRANSFAC
6668	SP2	Sp2 transcription factor	339487	ZBTB8OS	zinc finger and BTB domain containing 8 opposite strand	TF->gene	TRANSFAC
206358	SLC36A1	solute carrier family 36 (proton/amino acid symporter), member 1	535	ATP6V0A1	ATPase, H+ transporting, lysosomal V0 subunit a1	Undirected	IntNetDB
6720	SREBF1	sterol regulatory element binding transcription factor 1	3045	HBD	hemoglobin, delta	TF->gene	TRANSFAC
3172	HNF4A	hepatocyte nuclear factor 4, alpha	55200	PLEKHG6	pleckstrin homology domain containing, family G (with RhoGef domain) member 6	TF->gene	TRANSFAC
7027	TFDP1	transcription factor Dp-1	7504	XK	X-linked Kx blood group (McLeod syndrome)	Undirected	IntNetDB
1050	CEBPA	CCAAT/enhancer binding protein (C/EBP), alpha	10261	IGSF6	immunoglobulin superfamily, member 6	TF->gene	TRANSFAC
27232	GNMT	glycine N-methyltransferase	6580	SLC22A1	solute carrier family 22 (organic cation transporter), member 1	Undirected	IntNetDB
2353	FOS	v-fos FBJ murine osteosarcoma viral oncogene homolog	1544	CYP1A2	cytochrome P450, family 1, subfamily A, polypeptide 2	Undirected	STRING
2996	GYPE	glycophorin E	8991	SELENBP1	selenium binding protein 1	Undirected	IntNetDB
5460	POU5F1	POU class 5 homeobox 1	6722	SRF	serum response factor (c-fos serum response element-binding transcription factor)	TF->gene	TRANSFAC
2995	GYPC	glycophorin C (Gerbich blood group)	3045	HBD	hemoglobin, delta	Undirected	IntNetDB
4780	NFE2L2	nuclear factor (erythroid-derived 2)-like 2	3662	IRF4	interferon regulatory factor 4	TF->gene	JASPAR
84159	ARID5B	AT rich interactive domain 5B (MRF1-like)	3002	GZMB	granzyme B (granzyme 2, cytotoxic T-lymphocyte-associated serine esterase 1)	TF->gene	TRANSFAC
1998	ELF2	E74-like factor 2 (ets domain transcription factor)	9128	PRPF4	PRP4 pre-mRNA processing factor 4 homolog (yeast)	TF->gene	TRANSFAC
1088	CEACAM8	carcinoembryonic antigen-related cell adhesion molecule 8	1511	CTSG	cathepsin G	Undirected	IntNetDB
7431	VIM	vimentin	5111	PCNA	proliferating cell nuclear antigen	Undirected	STRING
405	ARNT	aryl hydrocarbon receptor nuclear translocator	389649	FLJ43582	FLJ43582 protein	TF->gene	JASPAR
571	BACH1	BTB and CNC homology 1, basic leucine zipper transcription factor 1	7157	TP53	tumor protein p53	TF->gene	TRANSFAC
3684	ITGAM	integrin, alpha M (complement component 3 receptor 3 subunit)	2244	FGB	fibrinogen beta chain	Undirected	STRING
6668	SP2	Sp2 transcription factor	3930	LBR	lamin B receptor	TF->gene	TRANSFAC
6647	SOD1	superoxide dismutase 1, soluble	2114	ETS2	v-ets erythroblastosis virus E26 oncogene homolog 2 (avian)	Undirected	STRING
2294	FOXF1	forkhead box F1	860	RUNX2	runt-related transcription factor 2	TF->gene	TRANSFAC
2623	GATA1	GATA binding protein 1 (globin transcription factor 1)	7001	PRDX2	peroxiredoxin 2	Undirected	IntNetDB
6670	SP3	Sp3 transcription factor	6667	SP1	Sp1 transcription factor	Undirected	STRING
hsa-miR-124	hsa-miR-124	hsa-miR-124	2319	FLOT2	flotillin 2	miRNA->gene	TargetScan
6653	SORL1	sortilin-related receptor, L(DLR class) A repeats-containing	80833	APOL3	apolipoprotein L, 3	Undirected	IntNetDB
23598	PATZ1	POZ (BTB) and AT hook containing zinc finger 1	7316	UBC	ubiquitin C	TF->gene	TRANSFAC
2623	GATA1	GATA binding protein 1 (globin transcription factor 1)	3047	HBG1	hemoglobin, gamma A	TF->gene	TRANSFAC
6670	SP3	Sp3 transcription factor	143666	LOC143666	hypothetical protein LOC143666	TF->gene	TRANSFAC
2623	GATA1	GATA binding protein 1 (globin transcription factor 1)	3048	HBG2	hemoglobin, gamma G	TF->gene	TRANSFAC
4666	NACA	nascent polypeptide-associated complex alpha subunit	6176	RPLP1	ribosomal protein, large, P1	Undirected	IntNetDB
hsa-miR-340	hsa-miR-340	hsa-miR-340	23500	DAAM2	dishevelled associated activator of morphogenesis 2	miRNA->gene	TargetScan
1991	ELA2	elastase 2, neutrophil	820	CAMP	cathelicidin antimicrobial peptide	Undirected	STRING
7157	TP53	tumor protein p53	100129250	LOC100129250	similar to hCG1811779	TF->gene	TRANSFAC
3172	HNF4A	hepatocyte nuclear factor 4, alpha	169026	SLC30A8	solute carrier family 30 (zinc transporter), member 8	TF->gene	TRANSFAC
2947	GSTM3	glutathione S-transferase M3 (brain)	1544	CYP1A2	cytochrome P450, family 1, subfamily A, polypeptide 2	KEGG directed	KEGG,STRING
2766	GMPR	guanosine monophosphate reductase	2987	GUK1	guanylate kinase 1	KEGG directed	KEGG
1544	CYP1A2	cytochrome P450, family 1, subfamily A, polypeptide 2	2330	FMO5	flavin containing monooxygenase 5	Undirected	IntNetDB
4899	NRF1	nuclear respiratory factor 1	6203	RPS9	ribosomal protein S9	TF->gene	TRANSFAC
6720	SREBF1	sterol regulatory element binding transcription factor 1	79143	MBOAT7	membrane bound O-acyltransferase domain containing 7	TF->gene	TRANSFAC
6161	RPL32	ribosomal protein L32	6176	RPLP1	ribosomal protein, large, P1	Undirected	STRING,IntNetDB
4807	NHLH1	nescient helix loop helix 1	79154	MGC4172	short-chain dehydrogenase/reductase	TF->gene	TRANSFAC
6157	RPL27A	ribosomal protein L27a	6189	RPS3A	ribosomal protein S3A	Undirected	STRING,IntNetDB
6670	SP3	Sp3 transcription factor	11132	CAPN10	calpain 10	TF->gene	TRANSFAC
51218	GLRX5	glutaredoxin 5	212	ALAS2	aminolevulinate, delta-, synthase 2	Undirected	STRING,IntNetDB
2294	FOXF1	forkhead box F1	8516	ITGA8	integrin, alpha 8	TF->gene	TRANSFAC
19	ABCA1	ATP-binding cassette, sub-family A (ABC1), member 1	64581	CLEC7A	C-type lectin domain family 7, member A	Undirected	IntNetDB
23463	ICMT	isoprenylcysteine carboxyl methyltransferase	24140	FTSJ1	FtsJ homolog 1 (E. coli)	Undirected	IntNetDB
1593	CYP27A1	cytochrome P450, family 27, subfamily A, polypeptide 1	2109	ETFB	electron-transfer-flavoprotein, beta polypeptide	Undirected	IntNetDB
6667	SP1	Sp1 transcription factor	203259	C9orf25	chromosome 9 open reading frame 25	TF->gene	TRANSFAC
1870	E2F2	E2F transcription factor 2	2176	FANCC	Fanconi anemia, complementation group C	TF->gene	TRANSFAC
6160	RPL31	ribosomal protein L31	6176	RPLP1	ribosomal protein, large, P1	Undirected	STRING,IntNetDB
6667	SP1	Sp1 transcription factor	7039	TGFA	transforming growth factor, alpha	TF->gene	TRANSFAC
6720	SREBF1	sterol regulatory element binding transcription factor 1	1544	CYP1A2	cytochrome P450, family 1, subfamily A, polypeptide 2	TF->gene	TRANSFAC
hsa-miR-124	hsa-miR-124	hsa-miR-124	7320	UBE2B	ubiquitin-conjugating enzyme E2B (RAD6 homolog)	miRNA->gene	TargetScan
1998	ELF2	E74-like factor 2 (ets domain transcription factor)	282809	WDR51B	WD repeat domain 51B	TF->gene	TRANSFAC
2649	NR6A1	nuclear receptor subfamily 6, group A, member 1	84833	USMG5	up-regulated during skeletal muscle growth 5 homolog (mouse)	TF->gene	TRANSFAC
1052	CEBPD	CCAAT/enhancer binding protein (C/EBP), delta	114991	ZNF618	zinc finger protein 618	TF->gene	TRANSFAC
1998	ELF2	E74-like factor 2 (ets domain transcription factor)	5920	RARRES3	retinoic acid receptor responder (tazarotene induced) 3	TF->gene	TRANSFAC
hsa-miR-142-3p	hsa-miR-142-3p	hsa-miR-142-3p	23531	MMD	monocyte to macrophage differentiation-associated	miRNA->gene	PicTar
103910	MRLC2	myosin regulatory light chain MRLC2	999	CDH1	cadherin 1, type 1, E-cadherin (epithelial)	Undirected	IntNetDB
6256	RXRA	retinoid X receptor, alpha	79689	STEAP4	STEAP family member 4	TF->gene	TRANSFAC
6189	RPS3A	ribosomal protein S3A	6728	SRP19	signal recognition particle 19kDa	Undirected	IntNetDB
6670	SP3	Sp3 transcription factor	11224	RPL35	ribosomal protein L35	TF->gene	TRANSFAC
2185	PTK2B	PTK2B protein tyrosine kinase 2 beta	6622	SNCA	synuclein, alpha (non A4 component of amyloid precursor)	Undirected	STRING
6670	SP3	Sp3 transcription factor	637	BID	BH3 interacting domain death agonist	TF->gene	TRANSFAC
317781	DDX51	DEAD (Asp-Glu-Ala-Asp) box polypeptide 51	6136	RPL12	ribosomal protein L12	Undirected	IntNetDB
23509	POFUT1	protein O-fucosyltransferase 1	5045	FURIN	furin (paired basic amino acid cleaving enzyme)	Undirected	IntNetDB
hsa-miR-124	hsa-miR-124	hsa-miR-124	19	ABCA1	ATP-binding cassette, sub-family A (ABC1), member 1	miRNA->gene	TargetScan
10098	TSPAN5	tetraspanin 5	8936	WASF1	WAS protein family, member 1	Undirected	IntNetDB
hsa-miR-454	hsa-miR-454	hsa-miR-454	23097	CDC2L6	cell division cycle 2-like 6 (CDK8-like)	miRNA->gene	TargetScan
6670	SP3	Sp3 transcription factor	379013	RNF138P1	ring finger protein 138 pseudogene 1	TF->gene	TRANSFAC
5145	PDE6A	phosphodiesterase 6A, cGMP-specific, rod, alpha	2987	GUK1	guanylate kinase 1	KEGG directed	KEGG
6670	SP3	Sp3 transcription factor	100129250	LOC100129250	similar to hCG1811779	TF->gene	TRANSFAC
hsa-miR-454	hsa-miR-454	hsa-miR-454	6667	SP1	Sp1 transcription factor	miRNA->gene	TargetScan
6161	RPL32	ribosomal protein L32	7555	CNBP	CCHC-type zinc finger, nucleic acid binding protein	Undirected	IntNetDB
1051	CEBPB	CCAAT/enhancer binding protein (C/EBP), beta	10174	SORBS3	sorbin and SH3 domain containing 3	TF->gene	TRANSFAC
6136	RPL12	ribosomal protein L12	7555	CNBP	CCHC-type zinc finger, nucleic acid binding protein	Undirected	IntNetDB
5460	POU5F1	POU class 5 homeobox 1	85462	FHDC1	FH2 domain containing 1	TF->gene	TRANSFAC
1050	CEBPA	CCAAT/enhancer binding protein (C/EBP), alpha	100132417	LOC100132417	Fc fragment of IgG, high affinity Ic, receptor (CD64)	TF->gene	TRANSFAC
6929	TCF3	transcription factor 3 (E2A immunoglobulin enhancer binding factors E12/E47)	126014	OSCAR	osteoclast associated, immunoglobulin-like receptor	TF->gene	TRANSFAC
6929	TCF3	transcription factor 3 (E2A immunoglobulin enhancer binding factors E12/E47)	2180	ACSL1	acyl-CoA synthetase long-chain family member 1	TF->gene	TRANSFAC
6223	RPS19	ribosomal protein S19	6176	RPLP1	ribosomal protein, large, P1	Undirected	STRING,IntNetDB
6668	SP2	Sp2 transcription factor	83605	CCM2	cerebral cavernous malformation 2	TF->gene	TRANSFAC
25793	FBXO7	F-box protein 7	51327	ERAF	erythroid associated factor	Undirected	IntNetDB
6670	SP3	Sp3 transcription factor	203259	C9orf25	chromosome 9 open reading frame 25	TF->gene	TRANSFAC
6189	RPS3A	ribosomal protein S3A	6125	RPL5	ribosomal protein L5	Undirected	STRING,IntNetDB
6668	SP2	Sp2 transcription factor	7431	VIM	vimentin	TF->gene	TRANSFAC
1051	CEBPB	CCAAT/enhancer binding protein (C/EBP), beta	147657	ZNF480	zinc finger protein 480	TF->gene	TRANSFAC
84159	ARID5B	AT rich interactive domain 5B (MRF1-like)	7320	UBE2B	ubiquitin-conjugating enzyme E2B (RAD6 homolog)	TF->gene	TRANSFAC
hsa-miR-503	hsa-miR-503	hsa-miR-503	85462	FHDC1	FH2 domain containing 1	miRNA->gene	TargetScan
2771	GNAI2	guanine nucleotide binding protein (G protein), alpha inhibiting activity polypeptide 2	26279	PLA2G2D	phospholipase A2, group IID	KEGG directed	KEGG,STRING
6203	RPS9	ribosomal protein S9	6191	RPS4X	ribosomal protein S4, X-linked	Undirected	STRING,IntNetDB
6667	SP1	Sp1 transcription factor	637	BID	BH3 interacting domain death agonist	TF->gene	TRANSFAC
6773	STAT2	signal transducer and activator of transcription 2, 113kDa	5724	PTAFR	platelet-activating factor receptor	Undirected	STRING
11224	RPL35	ribosomal protein L35	6176	RPLP1	ribosomal protein, large, P1	Undirected	STRING,IntNetDB
6777	STAT5B	signal transducer and activator of transcription 5B	5111	PCNA	proliferating cell nuclear antigen	Undirected	STRING
6670	SP3	Sp3 transcription factor	23097	CDC2L6	cell division cycle 2-like 6 (CDK8-like)	TF->gene	TRANSFAC
3006	HIST1H1C	histone cluster 1, H1c	3014	H2AFX	H2A histone family, member X	Undirected	STRING,IntNetDB
2908	NR3C1	nuclear receptor subfamily 3, group C, member 1 (glucocorticoid receptor)	653784	FAM128A	family with sequence similarity 128, member A	TF->gene	TRANSFAC
hsa-miR-486-5p	hsa-miR-486-5p	hsa-miR-486-5p	9846	GAB2	GRB2-associated binding protein 2	miRNA->gene	TargetScan
405	ARNT	aryl hydrocarbon receptor nuclear translocator	400927	LOC400927	TPTE and PTEN homologous inositol lipid phosphatase pseudogene	TF->gene	TRANSFAC
hsa-miR-320d	hsa-miR-320d	hsa-miR-320d	27236	ARFIP1	ADP-ribosylation factor interacting protein 1	miRNA->gene	TargetScan
6777	STAT5B	signal transducer and activator of transcription 5B	114805	GALNT13	UDP-N-acetyl-alpha-D-galactosamine:polypeptide N-acetylgalactosaminyltransferase 13 (GalNAc-T13)	TF->gene	TRANSFAC
6160	RPL31	ribosomal protein L31	6191	RPS4X	ribosomal protein S4, X-linked	Undirected	STRING,IntNetDB
6668	SP2	Sp2 transcription factor	2771	GNAI2	guanine nucleotide binding protein (G protein), alpha inhibiting activity polypeptide 2	TF->gene	TRANSFAC
2294	FOXF1	forkhead box F1	6125	RPL5	ribosomal protein L5	TF->gene	TRANSFAC
969	CD69	CD69 molecule	3684	ITGAM	integrin, alpha M (complement component 3 receptor 3 subunit)	Undirected	STRING
6929	TCF3	transcription factor 3 (E2A immunoglobulin enhancer binding factors E12/E47)	55830	GLT8D1	glycosyltransferase 8 domain containing 1	TF->gene	TRANSFAC,JASPAR
26279	PLA2G2D	phospholipase A2, group IID	240	ALOX5	arachidonate 5-lipoxygenase	KEGG directed	KEGG,STRING
3172	HNF4A	hepatocyte nuclear factor 4, alpha	25797	QPCT	glutaminyl-peptide cyclotransferase	TF->gene	TRANSFAC
3684	ITGAM	integrin, alpha M (complement component 3 receptor 3 subunit)	54899	PXK	PX domain containing serine/threonine kinase	Undirected	STRING
7157	TP53	tumor protein p53	7001	PRDX2	peroxiredoxin 2	Undirected	STRING
6670	SP3	Sp3 transcription factor	9141	PDCD5	programmed cell death 5	TF->gene	TRANSFAC
1991	ELA2	elastase 2, neutrophil	710	SERPING1	serpin peptidase inhibitor, clade G (C1 inhibitor), member 1	Undirected	STRING
8666	EIF3G	eukaryotic translation initiation factor 3, subunit G	6176	RPLP1	ribosomal protein, large, P1	Undirected	STRING,IntNetDB
4780	NFE2L2	nuclear factor (erythroid-derived 2)-like 2	140803	TRPM6	transient receptor potential cation channel, subfamily M, member 6	TF->gene	TRANSFAC
6667	SP1	Sp1 transcription factor	2771	GNAI2	guanine nucleotide binding protein (G protein), alpha inhibiting activity polypeptide 2	TF->gene	TRANSFAC
hsa-miR-19b	hsa-miR-19b	hsa-miR-19b	94241	TP53INP1	tumor protein p53 inducible nuclear protein 1	miRNA->gene	PicTar,TargetScan
6929	TCF3	transcription factor 3 (E2A immunoglobulin enhancer binding factors E12/E47)	25798	BRI3	brain protein I3	TF->gene	TRANSFAC
hsa-miR-134	hsa-miR-134	hsa-miR-134	4899	NRF1	nuclear respiratory factor 1	miRNA->gene	PicTar
5281	PIGF	phosphatidylinositol glycan anchor biosynthesis, class F	2321	FLT1	fms-related tyrosine kinase 1 (vascular endothelial growth factor/vascular permeability factor receptor)	Undirected	STRING
1191	CLU	clusterin	710	SERPING1	serpin peptidase inhibitor, clade G (C1 inhibitor), member 1	Undirected	IntNetDB
108	ADCY2	adenylate cyclase 2 (brain)	5145	PDE6A	phosphodiesterase 6A, cGMP-specific, rod, alpha	KEGG directed	KEGG
7157	TP53	tumor protein p53	3014	H2AFX	H2A histone family, member X	Undirected	STRING
2919	CXCL1	chemokine (C-X-C motif) ligand 1 (melanoma growth stimulating activity, alpha)	728	C5AR1	complement component 5a receptor 1	Undirected	STRING
998	CDC42	cell division cycle 42 (GTP binding protein, 25kDa)	19	ABCA1	ATP-binding cassette, sub-family A (ABC1), member 1	Undirected	STRING
hsa-miR-32	hsa-miR-32	hsa-miR-32	23531	MMD	monocyte to macrophage differentiation-associated	miRNA->gene	TargetScan
hsa-miR-124	hsa-miR-124	hsa-miR-124	115548	FCHO2	FCH domain only 2	miRNA->gene	TargetScan
6223	RPS19	ribosomal protein S19	6728	SRP19	signal recognition particle 19kDa	Undirected	IntNetDB
5901	RAN	RAN, member RAS oncogene family	7027	TFDP1	transcription factor Dp-1	Undirected	IntNetDB
2294	FOXF1	forkhead box F1	677	ZFP36L1	zinc finger protein 36, C3H type-like 1	TF->gene	TRANSFAC
5498	PPOX	protoporphyrinogen oxidase	8991	SELENBP1	selenium binding protein 1	Undirected	IntNetDB
5336	PLCG2	phospholipase C, gamma 2 (phosphatidylinositol-specific)	9047	SH2D2A	SH2 domain protein 2A	Undirected	KEGG,STRING
51547	SIRT7	sirtuin (silent mating type information regulation 2 homolog) 7 (S. cerevisiae)	6176	RPLP1	ribosomal protein, large, P1	Undirected	IntNetDB
hsa-miR-320d	hsa-miR-320d	hsa-miR-320d	2908	NR3C1	nuclear receptor subfamily 3, group C, member 1 (glucocorticoid receptor)	miRNA->gene	TargetScan
1593	CYP27A1	cytochrome P450, family 27, subfamily A, polypeptide 1	6580	SLC22A1	solute carrier family 22 (organic cation transporter), member 1	Undirected	IntNetDB
1088	CEACAM8	carcinoembryonic antigen-related cell adhesion molecule 8	4318	MMP9	matrix metallopeptidase 9 (gelatinase B, 92kDa gelatinase, 92kDa type IV collagenase)	Undirected	IntNetDB
6205	RPS11	ribosomal protein S11	6125	RPL5	ribosomal protein L5	Undirected	STRING,IntNetDB
6205	RPS11	ribosomal protein S11	6124	RPL4	ribosomal protein L4	Undirected	STRING,IntNetDB
4303	FOXO4	forkhead box O4	6667	SP1	Sp1 transcription factor	Undirected	IntNetDB
665	BNIP3L	BCL2/adenovirus E1B 19kDa interacting protein 3-like	8991	SELENBP1	selenium binding protein 1	Undirected	IntNetDB
2623	GATA1	GATA binding protein 1 (globin transcription factor 1)	124590	USH1G	Usher syndrome 1G (autosomal recessive)	TF->gene	TRANSFAC
hsa-miR-142-3p	hsa-miR-142-3p	hsa-miR-142-3p	5862	RAB2A	RAB2A, member RAS oncogene family	miRNA->gene	PicTar,TargetScan
405	ARNT	aryl hydrocarbon receptor nuclear translocator	4919	ROR1	receptor tyrosine kinase-like orphan receptor 1	TF->gene	TRANSFAC
1933	EEF1B2	eukaryotic translation elongation factor 1 beta 2	4666	NACA	nascent polypeptide-associated complex alpha subunit	Undirected	IntNetDB
hsa-miR-424	hsa-miR-424	hsa-miR-424	91663	MYADM	myeloid-associated differentiation marker	miRNA->gene	TargetScan
hsa-miR-320d	hsa-miR-320d	hsa-miR-320d	6391	SDHC	succinate dehydrogenase complex, subunit C, integral membrane protein, 15kDa	miRNA->gene	TargetScan
hsa-miR-32	hsa-miR-32	hsa-miR-32	4354	MPP1	membrane protein, palmitoylated 1, 55kDa	miRNA->gene	TargetScan
84159	ARID5B	AT rich interactive domain 5B (MRF1-like)	309	ANXA6	annexin A6	TF->gene	TRANSFAC
6670	SP3	Sp3 transcription factor	6238	RRBP1	ribosome binding protein 1 homolog 180kDa (dog)	TF->gene	TRANSFAC
23762	OSBP2	oxysterol binding protein 2	8991	SELENBP1	selenium binding protein 1	Undirected	IntNetDB
6176	RPLP1	ribosomal protein, large, P1	6168	RPL37A	ribosomal protein L37a	Undirected	STRING,IntNetDB
5700	PSMC1	proteasome (prosome, macropain) 26S subunit, ATPase, 1	6169	RPL38	ribosomal protein L38	Undirected	IntNetDB
598	BCL2L1	BCL2-like 1	5111	PCNA	proliferating cell nuclear antigen	Undirected	STRING
2114	ETS2	v-ets erythroblastosis virus E26 oncogene homolog 2 (avian)	1912	PHC2	polyhomeotic homolog 2 (Drosophila)	TF->gene	TRANSFAC
6720	SREBF1	sterol regulatory element binding transcription factor 1	6668	SP2	Sp2 transcription factor	TF->gene	TRANSFAC
23569	PADI4	peptidyl arginine deiminase, type IV	9960	USP3	ubiquitin specific peptidase 3	Undirected	IntNetDB
hsa-miR-320c	hsa-miR-320c	hsa-miR-320c	2114	ETS2	v-ets erythroblastosis virus E26 oncogene homolog 2 (avian)	miRNA->gene	TargetScan
708	C1QBP	complement component 1, q subcomponent binding protein	3848	KRT1	keratin 1	Undirected	STRING
1032	CDKN2D	cyclin-dependent kinase inhibitor 2D (p19, inhibits CDK4)	7157	TP53	tumor protein p53	Undirected	IntNetDB
6929	TCF3	transcription factor 3 (E2A immunoglobulin enhancer binding factors E12/E47)	4635	MYL4	myosin, light chain 4, alkali; atrial, embryonic	TF->gene	JASPAR
2649	NR6A1	nuclear receptor subfamily 6, group A, member 1	9846	GAB2	GRB2-associated binding protein 2	TF->gene	TRANSFAC
2996	GYPE	glycophorin E	665	BNIP3L	BCL2/adenovirus E1B 19kDa interacting protein 3-like	Undirected	IntNetDB
1052	CEBPD	CCAAT/enhancer binding protein (C/EBP), delta	100132417	LOC100132417	Fc fragment of IgG, high affinity Ic, receptor (CD64)	TF->gene	TRANSFAC
1051	CEBPB	CCAAT/enhancer binding protein (C/EBP), beta	51	ACOX1	acyl-Coenzyme A oxidase 1, palmitoyl	TF->gene	TRANSFAC
6161	RPL32	ribosomal protein L32	6218	RPS17	ribosomal protein S17	Undirected	STRING,IntNetDB
hsa-miR-320c	hsa-miR-320c	hsa-miR-320c	7431	VIM	vimentin	miRNA->gene	TargetScan
6670	SP3	Sp3 transcription factor	353	APRT	adenine phosphoribosyltransferase	TF->gene	TRANSFAC
6667	SP1	Sp1 transcription factor	57104	PNPLA2	patatin-like phospholipase domain containing 2	TF->gene	TRANSFAC
6670	SP3	Sp3 transcription factor	24140	FTSJ1	FtsJ homolog 1 (E. coli)	TF->gene	TRANSFAC
4899	NRF1	nuclear respiratory factor 1	100129250	LOC100129250	similar to hCG1811779	TF->gene	TRANSFAC
6667	SP1	Sp1 transcription factor	3930	LBR	lamin B receptor	TF->gene	TRANSFAC
hsa-miR-223	hsa-miR-223	hsa-miR-223	6622	SNCA	synuclein, alpha (non A4 component of amyloid precursor)	miRNA->gene	TargetScan
hsa-miR-130a	hsa-miR-130a	hsa-miR-130a	7111	TMOD1	tropomodulin 1	miRNA->gene	TargetScan
4807	NHLH1	nescient helix loop helix 1	8875	VNN2	vanin 2	TF->gene	TRANSFAC
6137	RPL13	ribosomal protein L13	6176	RPLP1	ribosomal protein, large, P1	Undirected	STRING,IntNetDB
6256	RXRA	retinoid X receptor, alpha	8875	VNN2	vanin 2	TF->gene	TRANSFAC
405	ARNT	aryl hydrocarbon receptor nuclear translocator	571	BACH1	BTB and CNC homology 1, basic leucine zipper transcription factor 1	TF->gene	TRANSFAC
6667	SP1	Sp1 transcription factor	116151	C20orf108	chromosome 20 open reading frame 108	TF->gene	TRANSFAC
1051	CEBPB	CCAAT/enhancer binding protein (C/EBP), beta	6161	RPL32	ribosomal protein L32	TF->gene	TRANSFAC
1051	CEBPB	CCAAT/enhancer binding protein (C/EBP), beta	6947	TCN1	transcobalamin I (vitamin B12 binding protein, R binder family)	TF->gene	TRANSFAC
8936	WASF1	WAS protein family, member 1	598	BCL2L1	BCL2-like 1	Undirected	STRING
10098	TSPAN5	tetraspanin 5	212	ALAS2	aminolevulinate, delta-, synthase 2	Undirected	IntNetDB
6125	RPL5	ribosomal protein L5	6191	RPS4X	ribosomal protein S4, X-linked	Undirected	STRING,IntNetDB
23598	PATZ1	POZ (BTB) and AT hook containing zinc finger 1	4601	MXI1	MAX interactor 1	Undirected	IntNetDB
5145	PDE6A	phosphodiesterase 6A, cGMP-specific, rod, alpha	2766	GMPR	guanosine monophosphate reductase	KEGG directed	KEGG
hsa-miR-376c	hsa-miR-376c	hsa-miR-376c	157	ADRBK2	adrenergic, beta, receptor kinase 2	miRNA->gene	TargetScan
2353	FOS	v-fos FBJ murine osteosarcoma viral oncogene homolog	9170	EDG4	lysophosphatidic acid receptor 2	Undirected	STRING
2038	EPB42	erythrocyte membrane protein band 4.2	2995	GYPC	glycophorin C (Gerbich blood group)	Undirected	IntNetDB
2038	EPB42	erythrocyte membrane protein band 4.2	2996	GYPE	glycophorin E	Undirected	IntNetDB
1870	E2F2	E2F transcription factor 2	23177	CEP68	centrosomal protein 68kDa	TF->gene	TRANSFAC
6256	RXRA	retinoid X receptor, alpha	3043	HBB	hemoglobin, beta	TF->gene	TRANSFAC
2597	GAPDH	glyceraldehyde-3-phosphate dehydrogenase	1544	CYP1A2	cytochrome P450, family 1, subfamily A, polypeptide 2	Undirected	STRING
84159	ARID5B	AT rich interactive domain 5B (MRF1-like)	60	ACTB	actin, beta	TF->gene	TRANSFAC
6136	RPL12	ribosomal protein L12	6166	RPL36AL	ribosomal protein L36a-like	Undirected	IntNetDB
2244	FGB	fibrinogen beta chain	710	SERPING1	serpin peptidase inhibitor, clade G (C1 inhibitor), member 1	Undirected	IntNetDB
hsa-miR-320c	hsa-miR-320c	hsa-miR-320c	25853	WDR40A	WD repeat domain 40A	miRNA->gene	TargetScan
7392	USF2	upstream transcription factor 2, c-fos interacting	100132247	LOC100132247	similar to Uncharacterized protein KIAA0220	TF->gene	TRANSFAC
6136	RPL12	ribosomal protein L12	6161	RPL32	ribosomal protein L32	Undirected	IntNetDB
4780	NFE2L2	nuclear factor (erythroid-derived 2)-like 2	11025	LILRB3	leukocyte immunoglobulin-like receptor, subfamily B (with TM and ITIM domains), member 3	TF->gene	TRANSFAC
7316	UBC	ubiquitin C	5111	PCNA	proliferating cell nuclear antigen	Undirected	STRING
6136	RPL12	ribosomal protein L12	6168	RPL37A	ribosomal protein L37a	Undirected	IntNetDB
6136	RPL12	ribosomal protein L12	6169	RPL38	ribosomal protein L38	Undirected	IntNetDB
6157	RPL27A	ribosomal protein L27a	6176	RPLP1	ribosomal protein, large, P1	Undirected	STRING,IntNetDB
6667	SP1	Sp1 transcription factor	51629	SLC25A39	solute carrier family 25, member 39	TF->gene	TRANSFAC
6136	RPL12	ribosomal protein L12	6143	RPL19	ribosomal protein L19	Undirected	IntNetDB
6143	RPL19	ribosomal protein L19	6176	RPLP1	ribosomal protein, large, P1	Undirected	STRING,IntNetDB
4780	NFE2L2	nuclear factor (erythroid-derived 2)-like 2	4051	CYP4F3	cytochrome P450, family 4, subfamily F, polypeptide 3	TF->gene	JASPAR
6722	SRF	serum response factor (c-fos serum response element-binding transcription factor)	hsa-miR-629	hsa-miR-629	hsa-miR-629	TF->miRNA	TRANSFAC
6160	RPL31	ribosomal protein L31	6161	RPL32	ribosomal protein L32	Undirected	STRING,IntNetDB
860	RUNX2	runt-related transcription factor 2	6282	S100A11	S100 calcium binding protein A11	TF->gene	TRANSFAC
6929	TCF3	transcription factor 3 (E2A immunoglobulin enhancer binding factors E12/E47)	7581	ZNF33A	zinc finger protein 33A	TF->gene	TRANSFAC
64411	CENTD3	centaurin, delta 3	998	CDC42	cell division cycle 42 (GTP binding protein, 25kDa)	Undirected	STRING
6160	RPL31	ribosomal protein L31	6169	RPL38	ribosomal protein L38	Undirected	STRING,IntNetDB
6160	RPL31	ribosomal protein L31	6168	RPL37A	ribosomal protein L37a	Undirected	STRING,IntNetDB
84159	ARID5B	AT rich interactive domain 5B (MRF1-like)	400927	LOC400927	TPTE and PTEN homologous inositol lipid phosphatase pseudogene	TF->gene	TRANSFAC
6929	TCF3	transcription factor 3 (E2A immunoglobulin enhancer binding factors E12/E47)	3042	HBM	hemoglobin, mu	TF->gene	TRANSFAC
11343	MGLL	monoglyceride lipase	9645	MICAL2	microtubule associated monoxygenase, calponin and LIM domain containing 2	Undirected	IntNetDB
10661	KLF1	Kruppel-like factor 1 (erythroid)	7027	TFDP1	transcription factor Dp-1	Undirected	IntNetDB
10661	KLF1	Kruppel-like factor 1 (erythroid)	645	BLVRB	biliverdin reductase B (flavin reductase (NADPH))	Undirected	IntNetDB
7392	USF2	upstream transcription factor 2, c-fos interacting	60	ACTB	actin, beta	TF->gene	TRANSFAC
4354	MPP1	membrane protein, palmitoylated 1, 55kDa	8991	SELENBP1	selenium binding protein 1	Undirected	IntNetDB
571	BACH1	BTB and CNC homology 1, basic leucine zipper transcription factor 1	344967	LOC344967	acyl-CoA thioesterase 7-like	TF->gene	TRANSFAC
6667	SP1	Sp1 transcription factor	5460	POU5F1	POU class 5 homeobox 1	TF->gene	TRANSFAC
317781	DDX51	DEAD (Asp-Glu-Ala-Asp) box polypeptide 51	6125	RPL5	ribosomal protein L5	Undirected	IntNetDB
2294	FOXF1	forkhead box F1	5336	PLCG2	phospholipase C, gamma 2 (phosphatidylinositol-specific)	TF->gene	TRANSFAC
6929	TCF3	transcription factor 3 (E2A immunoglobulin enhancer binding factors E12/E47)	60	ACTB	actin, beta	TF->gene	TRANSFAC,JASPAR
710	SERPING1	serpin peptidase inhibitor, clade G (C1 inhibitor), member 1	966	CD59	CD59 molecule, complement regulatory protein	Undirected	STRING
383	ARG1	arginase, liver	645	BLVRB	biliverdin reductase B (flavin reductase (NADPH))	Undirected	IntNetDB
6670	SP3	Sp3 transcription factor	10984	KCNQ1OT1	KCNQ1 overlapping transcript 1 (non-protein coding)	TF->gene	TRANSFAC
6155	RPL27	ribosomal protein L27	9045	RPL14	ribosomal protein L14	Undirected	STRING,IntNetDB
hsa-miR-124	hsa-miR-124	hsa-miR-124	4482	MSRA	methionine sulfoxide reductase A	miRNA->gene	TargetScan
6155	RPL27	ribosomal protein L27	6728	SRP19	signal recognition particle 19kDa	Undirected	IntNetDB
1998	ELF2	E74-like factor 2 (ets domain transcription factor)	6670	SP3	Sp3 transcription factor	Undirected	IntNetDB
6223	RPS19	ribosomal protein S19	6169	RPL38	ribosomal protein L38	Undirected	STRING,IntNetDB
6223	RPS19	ribosomal protein S19	6168	RPL37A	ribosomal protein L37a	Undirected	STRING
998	CDC42	cell division cycle 42 (GTP binding protein, 25kDa)	8936	WASF1	WAS protein family, member 1	Undirected	STRING
6223	RPS19	ribosomal protein S19	6161	RPL32	ribosomal protein L32	Undirected	STRING,IntNetDB
6223	RPS19	ribosomal protein S19	6160	RPL31	ribosomal protein L31	Undirected	STRING,IntNetDB
5460	POU5F1	POU class 5 homeobox 1	9846	GAB2	GRB2-associated binding protein 2	TF->gene	TRANSFAC
3579	IL8RB	interleukin 8 receptor, beta	2771	GNAI2	guanine nucleotide binding protein (G protein), alpha inhibiting activity polypeptide 2	KEGG directed	KEGG
1385	CREB1	cAMP responsive element binding protein 1	143666	LOC143666	hypothetical protein LOC143666	TF->gene	TRANSFAC
6256	RXRA	retinoid X receptor, alpha	79143	MBOAT7	membrane bound O-acyltransferase domain containing 7	TF->gene	JASPAR
212	ALAS2	aminolevulinate, delta-, synthase 2	51327	ERAF	erythroid associated factor	Undirected	IntNetDB
4780	NFE2L2	nuclear factor (erythroid-derived 2)-like 2	64411	CENTD3	centaurin, delta 3	TF->gene	JASPAR
6203	RPS9	ribosomal protein S9	6189	RPS3A	ribosomal protein S3A	Undirected	STRING,IntNetDB
6169	RPL38	ribosomal protein L38	6218	RPS17	ribosomal protein S17	Undirected	STRING,IntNetDB
3221	HOXC4	homeobox C4	5591	PRKDC	protein kinase, DNA-activated, catalytic polypeptide	Undirected	STRING
1933	EEF1B2	eukaryotic translation elongation factor 1 beta 2	6203	RPS9	ribosomal protein S9	Undirected	IntNetDB
860	RUNX2	runt-related transcription factor 2	23625	FAM89B	family with sequence similarity 89, member B	TF->gene	TRANSFAC
2353	FOS	v-fos FBJ murine osteosarcoma viral oncogene homolog	5336	PLCG2	phospholipase C, gamma 2 (phosphatidylinositol-specific)	Undirected	STRING
2649	NR6A1	nuclear receptor subfamily 6, group A, member 1	440574	C1orf151	chromosome 1 open reading frame 151	TF->gene	TRANSFAC
6668	SP2	Sp2 transcription factor	143666	LOC143666	hypothetical protein LOC143666	TF->gene	TRANSFAC
6160	RPL31	ribosomal protein L31	6189	RPS3A	ribosomal protein S3A	Undirected	STRING,IntNetDB
1050	CEBPA	CCAAT/enhancer binding protein (C/EBP), alpha	286826	LIN9	lin-9 homolog (C. elegans)	TF->gene	TRANSFAC
1870	E2F2	E2F transcription factor 2	374393	FAM111B	family with sequence similarity 111, member B	TF->gene	TRANSFAC
6667	SP1	Sp1 transcription factor	9990	SLC12A6	solute carrier family 12 (potassium/chloride transporters), member 6	TF->gene	TRANSFAC
4601	MXI1	MAX interactor 1	6670	SP3	Sp3 transcription factor	Undirected	IntNetDB
hsa-miR-223	hsa-miR-223	hsa-miR-223	6047	RNF4	ring finger protein 4	miRNA->gene	PicTar
6670	SP3	Sp3 transcription factor	4780	NFE2L2	nuclear factor (erythroid-derived 2)-like 2	TF->gene	TRANSFAC
3684	ITGAM	integrin, alpha M (complement component 3 receptor 3 subunit)	100132417	LOC100132417	Fc fragment of IgG, high affinity Ic, receptor (CD64)	Undirected	STRING
6124	RPL4	ribosomal protein L4	6133	RPL9	ribosomal protein L9	Undirected	STRING,IntNetDB
6929	TCF3	transcription factor 3 (E2A immunoglobulin enhancer binding factors E12/E47)	55840	EAF2	ELL associated factor 2	TF->gene	TRANSFAC
7039	TGFA	transforming growth factor, alpha	4352	MPL	myeloproliferative leukemia virus oncogene	Undirected	STRING
2109	ETFB	electron-transfer-flavoprotein, beta polypeptide	51	ACOX1	acyl-Coenzyme A oxidase 1, palmitoyl	Undirected	IntNetDB
6668	SP2	Sp2 transcription factor	6282	S100A11	S100 calcium binding protein A11	TF->gene	TRANSFAC
3172	HNF4A	hepatocyte nuclear factor 4, alpha	730971	FLJ36777	hypothetical protein LOC730971	TF->gene	TRANSFAC
23598	PATZ1	POZ (BTB) and AT hook containing zinc finger 1	414152	C10orf105	chromosome 10 open reading frame 105	TF->gene	TRANSFAC
1593	CYP27A1	cytochrome P450, family 27, subfamily A, polypeptide 1	66002	CYP4F12	cytochrome P450, family 4, subfamily F, polypeptide 12	Undirected	IntNetDB
2529	FUT7	fucosyltransferase 7 (alpha (1,3) fucosyltransferase)	6484	ST3GAL4	ST3 beta-galactoside alpha-2,3-sialyltransferase 4	Undirected	IntNetDB
1544	CYP1A2	cytochrome P450, family 1, subfamily A, polypeptide 2	240	ALOX5	arachidonate 5-lipoxygenase	Undirected	STRING
hsa-miR-33b	hsa-miR-33b	hsa-miR-33b	399474	TMEM200B	transmembrane protein 200B	miRNA->gene	TargetScan
1998	ELF2	E74-like factor 2 (ets domain transcription factor)	3221	HOXC4	homeobox C4	TF->gene	TRANSFAC
998	CDC42	cell division cycle 42 (GTP binding protein, 25kDa)	2185	PTK2B	PTK2B protein tyrosine kinase 2 beta	Undirected	STRING
54552	GNL3L	guanine nucleotide binding protein-like 3 (nucleolar)-like	6191	RPS4X	ribosomal protein S4, X-linked	Undirected	IntNetDB
3727	JUND	jun D proto-oncogene	3930	LBR	lamin B receptor	TF->gene	TRANSFAC
2114	ETS2	v-ets erythroblastosis virus E26 oncogene homolog 2 (avian)	hsa-miR-134	hsa-miR-134	hsa-miR-134	TF->miRNA	TRANSFAC
405	ARNT	aryl hydrocarbon receptor nuclear translocator	7320	UBE2B	ubiquitin-conjugating enzyme E2B (RAD6 homolog)	TF->gene	TRANSFAC
2353	FOS	v-fos FBJ murine osteosarcoma viral oncogene homolog	6667	SP1	Sp1 transcription factor	Undirected	STRING
6166	RPL36AL	ribosomal protein L36a-like	7555	CNBP	CCHC-type zinc finger, nucleic acid binding protein	Undirected	IntNetDB
1050	CEBPA	CCAAT/enhancer binding protein (C/EBP), alpha	10402	ST3GAL6	ST3 beta-galactoside alpha-2,3-sialyltransferase 6	TF->gene	TRANSFAC
6189	RPS3A	ribosomal protein S3A	7555	CNBP	CCHC-type zinc finger, nucleic acid binding protein	Undirected	IntNetDB
10098	TSPAN5	tetraspanin 5	2996	GYPE	glycophorin E	Undirected	IntNetDB
6668	SP2	Sp2 transcription factor	1051	CEBPB	CCAAT/enhancer binding protein (C/EBP), beta	TF->gene	TRANSFAC
hsa-miR-486-5p	hsa-miR-486-5p	hsa-miR-486-5p	55534	MAML3	mastermind-like 3 (Drosophila)	miRNA->gene	TargetScan
6777	STAT5B	signal transducer and activator of transcription 5B	10060	ABCC9	ATP-binding cassette, sub-family C (CFTR/MRP), member 9	TF->gene	TRANSFAC
6521	SLC4A1	solute carrier family 4, anion exchanger, member 1 (erythrocyte membrane protein band 3, Diego blood group)	7504	XK	X-linked Kx blood group (McLeod syndrome)	Undirected	IntNetDB
2771	GNAI2	guanine nucleotide binding protein (G protein), alpha inhibiting activity polypeptide 2	7277	TUBA4A	tubulin, alpha 4a	Undirected	IntNetDB
6720	SREBF1	sterol regulatory element binding transcription factor 1	3191	HNRNPL	heterogeneous nuclear ribonucleoprotein L	TF->gene	TRANSFAC
10562	OLFM4	olfactomedin 4	1991	ELA2	elastase 2, neutrophil	Undirected	STRING
7039	TGFA	transforming growth factor, alpha	2353	FOS	v-fos FBJ murine osteosarcoma viral oncogene homolog	Undirected	STRING
4311	MME	membrane metallo-endopeptidase	3662	IRF4	interferon regulatory factor 4	Undirected	STRING
11025	LILRB3	leukocyte immunoglobulin-like receptor, subfamily B (with TM and ITIM domains), member 3	3684	ITGAM	integrin, alpha M (complement component 3 receptor 3 subunit)	Undirected	IntNetDB
6668	SP2	Sp2 transcription factor	8460	TPST1	tyrosylprotein sulfotransferase 1	TF->gene	TRANSFAC
6670	SP3	Sp3 transcription factor	9047	SH2D2A	SH2 domain protein 2A	TF->gene	TRANSFAC
6653	SORL1	sortilin-related receptor, L(DLR class) A repeats-containing	5045	FURIN	furin (paired basic amino acid cleaving enzyme)	Undirected	STRING
6668	SP2	Sp2 transcription factor	5460	POU5F1	POU class 5 homeobox 1	TF->gene	TRANSFAC
6668	SP2	Sp2 transcription factor	91663	MYADM	myeloid-associated differentiation marker	TF->gene	TRANSFAC
3014	H2AFX	H2A histone family, member X	7030	TFE3	transcription factor binding to IGHM enhancer 3	Undirected	IntNetDB
6722	SRF	serum response factor (c-fos serum response element-binding transcription factor)	11081	KERA	keratocan	TF->gene	TRANSFAC
6668	SP2	Sp2 transcription factor	114804	RNF157	ring finger protein 157	TF->gene	TRANSFAC
hsa-miR-29c	hsa-miR-29c	hsa-miR-29c	677	ZFP36L1	zinc finger protein 36, C3H type-like 1	miRNA->gene	PicTar,TargetScan
6728	SRP19	signal recognition particle 19kDa	8666	EIF3G	eukaryotic translation initiation factor 3, subunit G	Undirected	IntNetDB
hsa-miR-340	hsa-miR-340	hsa-miR-340	6777	STAT5B	signal transducer and activator of transcription 5B	miRNA->gene	TargetScan
10098	TSPAN5	tetraspanin 5	6521	SLC4A1	solute carrier family 4, anion exchanger, member 1 (erythrocyte membrane protein band 3, Diego blood group)	Undirected	IntNetDB
1052	CEBPD	CCAAT/enhancer binding protein (C/EBP), delta	858	CAV2	caveolin 2	Undirected	IntNetDB
1051	CEBPB	CCAAT/enhancer binding protein (C/EBP), beta	240	ALOX5	arachidonate 5-lipoxygenase	Undirected	IntNetDB
6668	SP2	Sp2 transcription factor	55180	LINS1	lines homolog 1 (Drosophila)	TF->gene	TRANSFAC
7157	TP53	tumor protein p53	2353	FOS	v-fos FBJ murine osteosarcoma viral oncogene homolog	Undirected	STRING
9921	RNF10	ring finger protein 10	997	CDC34	cell division cycle 34 homolog (S. cerevisiae)	Undirected	IntNetDB
6777	STAT5B	signal transducer and activator of transcription 5B	414152	C10orf105	chromosome 10 open reading frame 105	TF->gene	TRANSFAC
hsa-miR-320c	hsa-miR-320c	hsa-miR-320c	7555	CNBP	CCHC-type zinc finger, nucleic acid binding protein	miRNA->gene	TargetScan
5718	PSMD12	proteasome (prosome, macropain) 26S subunit, non-ATPase, 12	11065	UBE2C	ubiquitin-conjugating enzyme E2C	Undirected	STRING
23567	ZNF346	zinc finger protein 346	6136	RPL12	ribosomal protein L12	Undirected	IntNetDB
3172	HNF4A	hepatocyte nuclear factor 4, alpha	9846	GAB2	GRB2-associated binding protein 2	TF->gene	TRANSFAC
6670	SP3	Sp3 transcription factor	137797	LYPD2	LY6/PLAUR domain containing 2	TF->gene	TRANSFAC
6166	RPL36AL	ribosomal protein L36a-like	6203	RPS9	ribosomal protein S9	Undirected	IntNetDB
6124	RPL4	ribosomal protein L4	6168	RPL37A	ribosomal protein L37a	Undirected	STRING,IntNetDB
6166	RPL36AL	ribosomal protein L36a-like	6191	RPS4X	ribosomal protein S4, X-linked	Undirected	IntNetDB
6670	SP3	Sp3 transcription factor	6647	SOD1	superoxide dismutase 1, soluble	TF->gene	TRANSFAC
10487	CAP1	CAP, adenylate cyclase-associated protein 1 (yeast)	998	CDC42	cell division cycle 42 (GTP binding protein, 25kDa)	Undirected	IntNetDB
6137	RPL13	ribosomal protein L13	6161	RPL32	ribosomal protein L32	Undirected	STRING,IntNetDB
6161	RPL32	ribosomal protein L32	9045	RPL14	ribosomal protein L14	Undirected	STRING,IntNetDB
51218	GLRX5	glutaredoxin 5	645	BLVRB	biliverdin reductase B (flavin reductase (NADPH))	Undirected	IntNetDB
6137	RPL13	ribosomal protein L13	6169	RPL38	ribosomal protein L38	Undirected	STRING,IntNetDB
6137	RPL13	ribosomal protein L13	6168	RPL37A	ribosomal protein L37a	Undirected	STRING,IntNetDB
7157	TP53	tumor protein p53	136991	ASZ1	ankyrin repeat, SAM and basic leucine zipper domain containing 1	Undirected	STRING
5901	RAN	RAN, member RAS oncogene family	7277	TUBA4A	tubulin, alpha 4a	Undirected	IntNetDB
hsa-miR-424	hsa-miR-424	hsa-miR-424	23531	MMD	monocyte to macrophage differentiation-associated	miRNA->gene	TargetScan
hsa-miR-340	hsa-miR-340	hsa-miR-340	114805	GALNT13	UDP-N-acetyl-alpha-D-galactosamine:polypeptide N-acetylgalactosaminyltransferase 13 (GalNAc-T13)	miRNA->gene	TargetScan
hsa-miR-130a	hsa-miR-130a	hsa-miR-130a	57568	SIPA1L2	signal-induced proliferation-associated 1 like 2	miRNA->gene	TargetScan
6208	RPS14	ribosomal protein S14	6176	RPLP1	ribosomal protein, large, P1	Undirected	STRING,IntNetDB
6176	RPLP1	ribosomal protein, large, P1	7555	CNBP	CCHC-type zinc finger, nucleic acid binding protein	Undirected	IntNetDB
51218	GLRX5	glutaredoxin 5	6521	SLC4A1	solute carrier family 4, anion exchanger, member 1 (erythrocyte membrane protein band 3, Diego blood group)	Undirected	IntNetDB
2185	PTK2B	PTK2B protein tyrosine kinase 2 beta	9170	EDG4	lysophosphatidic acid receptor 2	Undirected	STRING
7157	TP53	tumor protein p53	3006	HIST1H1C	histone cluster 1, H1c	Undirected	STRING
hsa-miR-130a	hsa-miR-130a	hsa-miR-130a	7039	TGFA	transforming growth factor, alpha	miRNA->gene	PicTar,TargetScan
405	ARNT	aryl hydrocarbon receptor nuclear translocator	51	ACOX1	acyl-Coenzyme A oxidase 1, palmitoyl	TF->gene	TRANSFAC
4807	NHLH1	nescient helix loop helix 1	7111	TMOD1	tropomodulin 1	TF->gene	JASPAR
2649	NR6A1	nuclear receptor subfamily 6, group A, member 1	2219	FCN1	ficolin (collagen/fibrinogen domain containing) 1	TF->gene	TRANSFAC
5498	PPOX	protoporphyrinogen oxidase	6521	SLC4A1	solute carrier family 4, anion exchanger, member 1 (erythrocyte membrane protein band 3, Diego blood group)	Undirected	IntNetDB
1052	CEBPD	CCAAT/enhancer binding protein (C/EBP), delta	284759	SIRPB2	signal-regulatory protein beta 2	TF->gene	TRANSFAC
7392	USF2	upstream transcription factor 2, c-fos interacting	22924	MAPRE3	microtubule-associated protein, RP/EB family, member 3	Undirected	STRING
6161	RPL32	ribosomal protein L32	6157	RPL27A	ribosomal protein L27a	Undirected	STRING,IntNetDB
966	CD59	CD59 molecule, complement regulatory protein	1191	CLU	clusterin	Undirected	STRING
6929	TCF3	transcription factor 3 (E2A immunoglobulin enhancer binding factors E12/E47)	8460	TPST1	tyrosylprotein sulfotransferase 1	TF->gene	TRANSFAC
2038	EPB42	erythrocyte membrane protein band 4.2	4354	MPP1	membrane protein, palmitoylated 1, 55kDa	Undirected	IntNetDB
6136	RPL12	ribosomal protein L12	6176	RPLP1	ribosomal protein, large, P1	Undirected	IntNetDB
4303	FOXO4	forkhead box O4	5718	PSMD12	proteasome (prosome, macropain) 26S subunit, non-ATPase, 12	TF->gene	TRANSFAC
5724	PTAFR	platelet-activating factor receptor	728	C5AR1	complement component 5a receptor 1	Undirected	IntNetDB
4051	CYP4F3	cytochrome P450, family 4, subfamily F, polypeptide 3	66002	CYP4F12	cytochrome P450, family 4, subfamily F, polypeptide 12	Undirected	IntNetDB
6777	STAT5B	signal transducer and activator of transcription 5B	25797	QPCT	glutaminyl-peptide cyclotransferase	TF->gene	TRANSFAC
6157	RPL27A	ribosomal protein L27a	6166	RPL36AL	ribosomal protein L36a-like	Undirected	IntNetDB
8936	WASF1	WAS protein family, member 1	6191	RPS4X	ribosomal protein S4, X-linked	Undirected	STRING
405	ARNT	aryl hydrocarbon receptor nuclear translocator	653784	FAM128A	family with sequence similarity 128, member A	TF->gene	JASPAR
6223	RPS19	ribosomal protein S19	7555	CNBP	CCHC-type zinc finger, nucleic acid binding protein	Undirected	IntNetDB
6157	RPL27A	ribosomal protein L27a	6168	RPL37A	ribosomal protein L37a	Undirected	STRING,IntNetDB
6667	SP1	Sp1 transcription factor	6238	RRBP1	ribosome binding protein 1 homolog 180kDa (dog)	TF->gene	TRANSFAC
860	RUNX2	runt-related transcription factor 2	84681	HINT2	histidine triad nucleotide binding protein 2	TF->gene	TRANSFAC
1051	CEBPB	CCAAT/enhancer binding protein (C/EBP), beta	284759	SIRPB2	signal-regulatory protein beta 2	TF->gene	TRANSFAC
6670	SP3	Sp3 transcription factor	51629	SLC25A39	solute carrier family 25, member 39	TF->gene	TRANSFAC
4303	FOXO4	forkhead box O4	8843	GPR109B	G protein-coupled receptor 109B	TF->gene	TRANSFAC
6929	TCF3	transcription factor 3 (E2A immunoglobulin enhancer binding factors E12/E47)	6047	RNF4	ring finger protein 4	TF->gene	TRANSFAC,JASPAR
6155	RPL27	ribosomal protein L27	6157	RPL27A	ribosomal protein L27a	Undirected	STRING,IntNetDB
6667	SP1	Sp1 transcription factor	112398	EGLN2	egl nine homolog 2 (C. elegans)	TF->gene	TRANSFAC
6256	RXRA	retinoid X receptor, alpha	9732	DOCK4	dedicator of cytokinesis 4	TF->gene	TRANSFAC
6722	SRF	serum response factor (c-fos serum response element-binding transcription factor)	5045	FURIN	furin (paired basic amino acid cleaving enzyme)	TF->gene	TRANSFAC
212	ALAS2	aminolevulinate, delta-, synthase 2	645	BLVRB	biliverdin reductase B (flavin reductase (NADPH))	Undirected	IntNetDB
1998	ELF2	E74-like factor 2 (ets domain transcription factor)	5478	PPIA	peptidylprolyl isomerase A (cyclophilin A)	TF->gene	TRANSFAC
6777	STAT5B	signal transducer and activator of transcription 5B	84002	B3GNT5	UDP-GlcNAc:betaGal beta-1,3-N-acetylglucosaminyltransferase 5	TF->gene	TRANSFAC
6133	RPL9	ribosomal protein L9	6728	SRP19	signal recognition particle 19kDa	Undirected	IntNetDB
23218	NBEAL2	neurobeachin-like 2	9586	CREB5	cAMP responsive element binding protein 5	Undirected	IntNetDB
405	ARNT	aryl hydrocarbon receptor nuclear translocator	3482	IGF2R	insulin-like growth factor 2 receptor	TF->gene	TRANSFAC
966	CD59	CD59 molecule, complement regulatory protein	1043	CD52	CD52 molecule	Undirected	STRING
hsa-miR-424	hsa-miR-424	hsa-miR-424	55437	ALS2CR2	amyotrophic lateral sclerosis 2 (juvenile) chromosome region, candidate 2	miRNA->gene	TargetScan
1052	CEBPD	CCAAT/enhancer binding protein (C/EBP), delta	90338	ZNF160	zinc finger protein 160	TF->gene	TRANSFAC
2908	NR3C1	nuclear receptor subfamily 3, group C, member 1 (glucocorticoid receptor)	4253	CTAGE5	CTAGE family, member 5	TF->gene	TRANSFAC
hsa-miR-301a	hsa-miR-301a	hsa-miR-301a	7039	TGFA	transforming growth factor, alpha	miRNA->gene	TargetScan
6136	RPL12	ribosomal protein L12	9045	RPL14	ribosomal protein L14	Undirected	IntNetDB
6722	SRF	serum response factor (c-fos serum response element-binding transcription factor)	2358	FPRL1	formyl peptide receptor 2	TF->gene	TRANSFAC,JASPAR
2623	GATA1	GATA binding protein 1 (globin transcription factor 1)	3958	LGALS3	lectin, galactoside-binding, soluble, 3	TF->gene	TRANSFAC
6168	RPL37A	ribosomal protein L37a	6191	RPS4X	ribosomal protein S4, X-linked	Undirected	STRING,IntNetDB
4899	NRF1	nuclear respiratory factor 1	100093631	LOC100093631	general transcription factor II, i, pseudogene	TF->gene	TRANSFAC
7157	TP53	tumor protein p53	55592	GOLGA2L1	golgi autoantigen, golgin subfamily a, 2-like 1	TF->gene	TRANSFAC
3727	JUND	jun D proto-oncogene	6777	STAT5B	signal transducer and activator of transcription 5B	TF->gene	TRANSFAC
6929	TCF3	transcription factor 3 (E2A immunoglobulin enhancer binding factors E12/E47)	7171	TPM4	tropomyosin 4	TF->gene	JASPAR
6929	TCF3	transcription factor 3 (E2A immunoglobulin enhancer binding factors E12/E47)	51024	FIS1	fission 1 (mitochondrial outer membrane) homolog (S. cerevisiae)	TF->gene	TRANSFAC
4051	CYP4F3	cytochrome P450, family 4, subfamily F, polypeptide 3	240	ALOX5	arachidonate 5-lipoxygenase	KEGG directed	KEGG,STRING
6929	TCF3	transcription factor 3 (E2A immunoglobulin enhancer binding factors E12/E47)	6888	TALDO1	transaldolase 1	TF->gene	TRANSFAC
hsa-miR-340	hsa-miR-340	hsa-miR-340	3930	LBR	lamin B receptor	miRNA->gene	TargetScan
6223	RPS19	ribosomal protein S19	6191	RPS4X	ribosomal protein S4, X-linked	Undirected	STRING,IntNetDB
4482	MSRA	methionine sulfoxide reductase A	6647	SOD1	superoxide dismutase 1, soluble	Undirected	IntNetDB
6223	RPS19	ribosomal protein S19	6205	RPS11	ribosomal protein S11	Undirected	STRING,IntNetDB
1050	CEBPA	CCAAT/enhancer binding protein (C/EBP), alpha	6279	S100A8	S100 calcium binding protein A8	TF->gene	TRANSFAC
6223	RPS19	ribosomal protein S19	6203	RPS9	ribosomal protein S9	Undirected	STRING,IntNetDB
6223	RPS19	ribosomal protein S19	6208	RPS14	ribosomal protein S14	Undirected	STRING,IntNetDB
6203	RPS9	ribosomal protein S9	6176	RPLP1	ribosomal protein, large, P1	Undirected	STRING,IntNetDB
2908	NR3C1	nuclear receptor subfamily 3, group C, member 1 (glucocorticoid receptor)	5610	EIF2AK2	eukaryotic translation initiation factor 2-alpha kinase 2	TF->gene	TRANSFAC
6169	RPL38	ribosomal protein L38	6208	RPS14	ribosomal protein S14	Undirected	STRING,IntNetDB
2294	FOXF1	forkhead box F1	1912	PHC2	polyhomeotic homolog 2 (Drosophila)	TF->gene	TRANSFAC
6668	SP2	Sp2 transcription factor	84681	HINT2	histidine triad nucleotide binding protein 2	TF->gene	TRANSFAC
2908	NR3C1	nuclear receptor subfamily 3, group C, member 1 (glucocorticoid receptor)	9587	MAD2L1BP	MAD2L1 binding protein	TF->gene	JASPAR
2908	NR3C1	nuclear receptor subfamily 3, group C, member 1 (glucocorticoid receptor)	100129034	LOC100129034	hypothetical protein LOC100129034	TF->gene	TRANSFAC
10060	ABCC9	ATP-binding cassette, sub-family C (CFTR/MRP), member 9	19	ABCA1	ATP-binding cassette, sub-family A (ABC1), member 1	Undirected	IntNetDB
405	ARNT	aryl hydrocarbon receptor nuclear translocator	3039	HBA1	hemoglobin, alpha 1	TF->gene	TRANSFAC
hsa-miR-301a	hsa-miR-301a	hsa-miR-301a	969	CD69	CD69 molecule	miRNA->gene	TargetScan
5460	POU5F1	POU class 5 homeobox 1	143686	SESN3	sestrin 3	TF->gene	TRANSFAC
hsa-miR-454	hsa-miR-454	hsa-miR-454	9586	CREB5	cAMP responsive element binding protein 5	miRNA->gene	TargetScan
571	BACH1	BTB and CNC homology 1, basic leucine zipper transcription factor 1	966	CD59	CD59 molecule, complement regulatory protein	TF->gene	TRANSFAC
1050	CEBPA	CCAAT/enhancer binding protein (C/EBP), alpha	51547	SIRT7	sirtuin (silent mating type information regulation 2 homolog) 7 (S. cerevisiae)	TF->gene	TRANSFAC
23598	PATZ1	POZ (BTB) and AT hook containing zinc finger 1	4318	MMP9	matrix metallopeptidase 9 (gelatinase B, 92kDa gelatinase, 92kDa type IV collagenase)	TF->gene	TRANSFAC
84159	ARID5B	AT rich interactive domain 5B (MRF1-like)	hsa-miR-301a	hsa-miR-301a	hsa-miR-301a	TF->miRNA	TRANSFAC
1933	EEF1B2	eukaryotic translation elongation factor 1 beta 2	6160	RPL31	ribosomal protein L31	Undirected	IntNetDB
1933	EEF1B2	eukaryotic translation elongation factor 1 beta 2	6161	RPL32	ribosomal protein L32	Undirected	IntNetDB
405	ARNT	aryl hydrocarbon receptor nuclear translocator	57533	TBC1D14	TBC1 domain family, member 14	TF->gene	TRANSFAC
6670	SP3	Sp3 transcription factor	7920	BAT5	HLA-B associated transcript 5	TF->gene	TRANSFAC
338442	GPR109A	G protein-coupled receptor 109A	8843	GPR109B	G protein-coupled receptor 109B	Undirected	IntNetDB
2353	FOS	v-fos FBJ murine osteosarcoma viral oncogene homolog	2114	ETS2	v-ets erythroblastosis virus E26 oncogene homolog 2 (avian)	Undirected	STRING,IntNetDB
6720	SREBF1	sterol regulatory element binding transcription factor 1	2109	ETFB	electron-transfer-flavoprotein, beta polypeptide	TF->gene	TRANSFAC
1054	CEBPG	CCAAT/enhancer binding protein (C/EBP), gamma	92799	SHKBP1	SH3KBP1 binding protein 1	TF->gene	TRANSFAC
6668	SP2	Sp2 transcription factor	353	APRT	adenine phosphoribosyltransferase	TF->gene	TRANSFAC
57379	AICDA	activation-induced cytidine deaminase	3014	H2AFX	H2A histone family, member X	Undirected	STRING
8666	EIF3G	eukaryotic translation initiation factor 3, subunit G	6191	RPS4X	ribosomal protein S4, X-linked	Undirected	STRING,IntNetDB
6710	SPTB	spectrin, beta, erythrocytic	7169	TPM2	tropomyosin 2 (beta)	Undirected	IntNetDB
hsa-miR-424	hsa-miR-424	hsa-miR-424	85462	FHDC1	FH2 domain containing 1	miRNA->gene	TargetScan
hsa-miR-142-3p	hsa-miR-142-3p	hsa-miR-142-3p	203228	C9orf72	chromosome 9 open reading frame 72	miRNA->gene	PicTar,TargetScan
3727	JUND	jun D proto-oncogene	201229	LOC201229	hypothetical protein LOC201229	TF->gene	TRANSFAC
2996	GYPE	glycophorin E	5498	PPOX	protoporphyrinogen oxidase	Undirected	IntNetDB
hsa-miR-32	hsa-miR-32	hsa-miR-32	6667	SP1	Sp1 transcription factor	miRNA->gene	PicTar,TargetScan
6535	SLC6A8	solute carrier family 6 (neurotransmitter transporter, creatine), member 8	6809	STX3	syntaxin 3	Undirected	IntNetDB
6668	SP2	Sp2 transcription factor	2109	ETFB	electron-transfer-flavoprotein, beta polypeptide	TF->gene	TRANSFAC
6143	RPL19	ribosomal protein L19	6124	RPL4	ribosomal protein L4	Undirected	STRING,IntNetDB
hsa-miR-320b	hsa-miR-320b	hsa-miR-320b	389136	VGLL3	vestigial like 3 (Drosophila)	miRNA->gene	TargetScan
3820	KLRB1	killer cell lectin-like receptor subfamily B, member 1	5920	RARRES3	retinoic acid receptor responder (tazarotene induced) 3	Undirected	IntNetDB
6256	RXRA	retinoid X receptor, alpha	57222	ERGIC1	endoplasmic reticulum-golgi intermediate compartment (ERGIC) 1	TF->gene	JASPAR
2623	GATA1	GATA binding protein 1 (globin transcription factor 1)	4707	NDUFB1	NADH dehydrogenase (ubiquinone) 1 beta subcomplex, 1, 7kDa	TF->gene	TRANSFAC
6720	SREBF1	sterol regulatory element binding transcription factor 1	440574	C1orf151	chromosome 1 open reading frame 151	TF->gene	TRANSFAC
6667	SP1	Sp1 transcription factor	11345	GABARAPL2	GABA(A) receptor-associated protein-like 2	TF->gene	TRANSFAC
hsa-miR-301a	hsa-miR-301a	hsa-miR-301a	58528	RRAGD	Ras-related GTP binding D	miRNA->gene	TargetScan
3684	ITGAM	integrin, alpha M (complement component 3 receptor 3 subunit)	4311	MME	membrane metallo-endopeptidase	Undirected	STRING
6720	SREBF1	sterol regulatory element binding transcription factor 1	159162	RBMY2FP	RNA binding motif protein, Y-linked, family 2, member F pseudogene	TF->gene	TRANSFAC
6667	SP1	Sp1 transcription factor	10984	KCNQ1OT1	KCNQ1 overlapping transcript 1 (non-protein coding)	TF->gene	TRANSFAC
1052	CEBPD	CCAAT/enhancer binding protein (C/EBP), delta	92799	SHKBP1	SH3KBP1 binding protein 1	TF->gene	TRANSFAC
1385	CREB1	cAMP responsive element binding protein 1	23433	RHOQ	ras homolog gene family, member Q	TF->gene	TRANSFAC
hsa-miR-124	hsa-miR-124	hsa-miR-124	637	BID	BH3 interacting domain death agonist	miRNA->gene	TargetScan
4780	NFE2L2	nuclear factor (erythroid-derived 2)-like 2	6777	STAT5B	signal transducer and activator of transcription 5B	TF->gene	JASPAR
29997	GLTSCR2	glioma tumor suppressor candidate region gene 2	7178	TPT1	tumor protein, translationally-controlled 1	Undirected	IntNetDB
6670	SP3	Sp3 transcription factor	79862	ZNF669	zinc finger protein 669	TF->gene	TRANSFAC
3820	KLRB1	killer cell lectin-like receptor subfamily B, member 1	5724	PTAFR	platelet-activating factor receptor	Undirected	IntNetDB
6668	SP2	Sp2 transcription factor	6102	RP2	retinitis pigmentosa 2 (X-linked recessive)	TF->gene	TRANSFAC
6218	RPS17	ribosomal protein S17	7555	CNBP	CCHC-type zinc finger, nucleic acid binding protein	Undirected	IntNetDB
6668	SP2	Sp2 transcription factor	379013	RNF138P1	ring finger protein 138 pseudogene 1	TF->gene	TRANSFAC
19	ABCA1	ATP-binding cassette, sub-family A (ABC1), member 1	6653	SORL1	sortilin-related receptor, L(DLR class) A repeats-containing	Undirected	IntNetDB
6143	RPL19	ribosomal protein L19	6728	SRP19	signal recognition particle 19kDa	Undirected	IntNetDB
2995	GYPC	glycophorin C (Gerbich blood group)	4354	MPP1	membrane protein, palmitoylated 1, 55kDa	Undirected	IntNetDB
1544	CYP1A2	cytochrome P450, family 1, subfamily A, polypeptide 2	1593	CYP27A1	cytochrome P450, family 27, subfamily A, polypeptide 1	Undirected	IntNetDB
hsa-miR-130a	hsa-miR-130a	hsa-miR-130a	2180	ACSL1	acyl-CoA synthetase long-chain family member 1	miRNA->gene	PicTar,TargetScan
6722	SRF	serum response factor (c-fos serum response element-binding transcription factor)	2353	FOS	v-fos FBJ murine osteosarcoma viral oncogene homolog	Undirected	STRING
hsa-miR-124	hsa-miR-124	hsa-miR-124	1054	CEBPG	CCAAT/enhancer binding protein (C/EBP), gamma	miRNA->gene	TargetScan
6720	SREBF1	sterol regulatory element binding transcription factor 1	6136	RPL12	ribosomal protein L12	TF->gene	TRANSFAC
405	ARNT	aryl hydrocarbon receptor nuclear translocator	54552	GNL3L	guanine nucleotide binding protein-like 3 (nucleolar)-like	TF->gene	TRANSFAC
4303	FOXO4	forkhead box O4	391634	HSP90AB2P	heat shock protein 90kDa alpha (cytosolic), class B member 2 (pseudogene)	TF->gene	TRANSFAC
3482	IGF2R	insulin-like growth factor 2 receptor	6653	SORL1	sortilin-related receptor, L(DLR class) A repeats-containing	Undirected	IntNetDB
51327	ERAF	erythroid associated factor	6521	SLC4A1	solute carrier family 4, anion exchanger, member 1 (erythrocyte membrane protein band 3, Diego blood group)	Undirected	IntNetDB
5478	PPIA	peptidylprolyl isomerase A (cyclophilin A)	5901	RAN	RAN, member RAS oncogene family	Undirected	IntNetDB
558	AXL	AXL receptor tyrosine kinase	4318	MMP9	matrix metallopeptidase 9 (gelatinase B, 92kDa gelatinase, 92kDa type IV collagenase)	Undirected	STRING
1544	CYP1A2	cytochrome P450, family 1, subfamily A, polypeptide 2	51599	LSR	lipolysis stimulated lipoprotein receptor	Undirected	IntNetDB
9810	RNF40	ring finger protein 40	7316	UBC	ubiquitin C	Undirected	STRING
6166	RPL36AL	ribosomal protein L36a-like	6189	RPS3A	ribosomal protein S3A	Undirected	IntNetDB
405	ARNT	aryl hydrocarbon receptor nuclear translocator	11345	GABARAPL2	GABA(A) receptor-associated protein-like 2	TF->gene	TRANSFAC
hsa-miR-376a	hsa-miR-376a	hsa-miR-376a	6667	SP1	Sp1 transcription factor	miRNA->gene	TargetScan
hsa-miR-301a	hsa-miR-301a	hsa-miR-301a	55534	MAML3	mastermind-like 3 (Drosophila)	miRNA->gene	TargetScan
hsa-miR-134	hsa-miR-134	hsa-miR-134	6777	STAT5B	signal transducer and activator of transcription 5B	miRNA->gene	TargetScan
11130	ZWINT	ZW10 interactor	2305	FOXM1	forkhead box M1	Undirected	IntNetDB
6667	SP1	Sp1 transcription factor	9170	EDG4	lysophosphatidic acid receptor 2	TF->gene	TRANSFAC
5473	PPBP	pro-platelet basic protein (chemokine (C-X-C motif) ligand 7)	728	C5AR1	complement component 5a receptor 1	Undirected	STRING,IntNetDB
6668	SP2	Sp2 transcription factor	56996	SLC12A9	solute carrier family 12 (potassium/chloride transporters), member 9	TF->gene	TRANSFAC
7392	USF2	upstream transcription factor 2, c-fos interacting	309	ANXA6	annexin A6	TF->gene	TRANSFAC
hsa-miR-320d	hsa-miR-320d	hsa-miR-320d	7555	CNBP	CCHC-type zinc finger, nucleic acid binding protein	miRNA->gene	TargetScan
25793	FBXO7	F-box protein 7	4354	MPP1	membrane protein, palmitoylated 1, 55kDa	Undirected	IntNetDB
6621	SNAPC4	small nuclear RNA activating complex, polypeptide 4, 190kDa	6722	SRF	serum response factor (c-fos serum response element-binding transcription factor)	Undirected	IntNetDB
4807	NHLH1	nescient helix loop helix 1	6888	TALDO1	transaldolase 1	TF->gene	JASPAR
1051	CEBPB	CCAAT/enhancer binding protein (C/EBP), beta	6102	RP2	retinitis pigmentosa 2 (X-linked recessive)	TF->gene	TRANSFAC
hsa-miR-124	hsa-miR-124	hsa-miR-124	2180	ACSL1	acyl-CoA synthetase long-chain family member 1	miRNA->gene	TargetScan
6929	TCF3	transcription factor 3 (E2A immunoglobulin enhancer binding factors E12/E47)	9810	RNF40	ring finger protein 40	TF->gene	TRANSFAC
6521	SLC4A1	solute carrier family 4, anion exchanger, member 1 (erythrocyte membrane protein band 3, Diego blood group)	8991	SELENBP1	selenium binding protein 1	Undirected	IntNetDB
55803	CENTA2	centaurin, alpha 2	64411	CENTD3	centaurin, delta 3	Undirected	IntNetDB
598	BCL2L1	BCL2-like 1	1854	DUT	deoxyuridine triphosphatase	Undirected	STRING
6256	RXRA	retinoid X receptor, alpha	10677	AVIL	advillin	TF->gene	JASPAR
571	BACH1	BTB and CNC homology 1, basic leucine zipper transcription factor 1	79689	STEAP4	STEAP family member 4	TF->gene	TRANSFAC
1052	CEBPD	CCAAT/enhancer binding protein (C/EBP), delta	4780	NFE2L2	nuclear factor (erythroid-derived 2)-like 2	TF->gene	TRANSFAC
6124	RPL4	ribosomal protein L4	6136	RPL12	ribosomal protein L12	Undirected	IntNetDB
6777	STAT5B	signal transducer and activator of transcription 5B	7392	USF2	upstream transcription factor 2, c-fos interacting	Undirected	IntNetDB
4666	NACA	nascent polypeptide-associated complex alpha subunit	6124	RPL4	ribosomal protein L4	Undirected	IntNetDB
4666	NACA	nascent polypeptide-associated complex alpha subunit	6125	RPL5	ribosomal protein L5	Undirected	IntNetDB
6282	S100A11	S100 calcium binding protein A11	60	ACTB	actin, beta	Undirected	STRING
377677	CA13	carbonic anhydrase XIII	762	CA4	carbonic anhydrase IV	Undirected	IntNetDB
1051	CEBPB	CCAAT/enhancer binding protein (C/EBP), beta	3047	HBG1	hemoglobin, gamma A	TF->gene	TRANSFAC
6667	SP1	Sp1 transcription factor	9086	EIF1AY	eukaryotic translation initiation factor 1A, Y-linked	TF->gene	TRANSFAC
hsa-miR-301a	hsa-miR-301a	hsa-miR-301a	6667	SP1	Sp1 transcription factor	miRNA->gene	TargetScan
hsa-miR-32	hsa-miR-32	hsa-miR-32	5577	PRKAR2B	protein kinase, cAMP-dependent, regulatory, type II, beta	miRNA->gene	PicTar,TargetScan
60	ACTB	actin, beta	103910	MRLC2	myosin regulatory light chain MRLC2	Undirected	KEGG,STRING
1051	CEBPB	CCAAT/enhancer binding protein (C/EBP), beta	3048	HBG2	hemoglobin, gamma G	TF->gene	TRANSFAC
6141	RPL18	ribosomal protein L18	6205	RPS11	ribosomal protein S11	Undirected	STRING,IntNetDB
23598	PATZ1	POZ (BTB) and AT hook containing zinc finger 1	3042	HBM	hemoglobin, mu	TF->gene	TRANSFAC
6668	SP2	Sp2 transcription factor	441951	C20orf199	chromosome 20 open reading frame 199	TF->gene	TRANSFAC
6136	RPL12	ribosomal protein L12	6141	RPL18	ribosomal protein L18	Undirected	IntNetDB
4318	MMP9	matrix metallopeptidase 9 (gelatinase B, 92kDa gelatinase, 92kDa type IV collagenase)	4303	FOXO4	forkhead box O4	Undirected	STRING
6670	SP3	Sp3 transcription factor	6102	RP2	retinitis pigmentosa 2 (X-linked recessive)	TF->gene	TRANSFAC
hsa-miR-340	hsa-miR-340	hsa-miR-340	26145	IRF2BP1	interferon regulatory factor 2 binding protein 1	miRNA->gene	TargetScan
405	ARNT	aryl hydrocarbon receptor nuclear translocator	100129250	LOC100129250	similar to hCG1811779	TF->gene	TRANSFAC
7157	TP53	tumor protein p53	6667	SP1	Sp1 transcription factor	Undirected	STRING
5971	RELB	v-rel reticuloendotheliosis viral oncogene homolog B	7157	TP53	tumor protein p53	Undirected	STRING
6136	RPL12	ribosomal protein L12	6728	SRP19	signal recognition particle 19kDa	Undirected	IntNetDB
7392	USF2	upstream transcription factor 2, c-fos interacting	2353	FOS	v-fos FBJ murine osteosarcoma viral oncogene homolog	Undirected	STRING
hsa-miR-32	hsa-miR-32	hsa-miR-32	84159	ARID5B	AT rich interactive domain 5B (MRF1-like)	miRNA->gene	TargetScan
6580	SLC22A1	solute carrier family 22 (organic cation transporter), member 1	66002	CYP4F12	cytochrome P450, family 4, subfamily F, polypeptide 12	Undirected	IntNetDB
4635	MYL4	myosin, light chain 4, alkali; atrial, embryonic	7169	TPM2	tropomyosin 2 (beta)	Undirected	IntNetDB
4898	NRD1	nardilysin (N-arginine dibasic convertase)	6653	SORL1	sortilin-related receptor, L(DLR class) A repeats-containing	Undirected	IntNetDB
1032	CDKN2D	cyclin-dependent kinase inhibitor 2D (p19, inhibits CDK4)	6888	TALDO1	transaldolase 1	Undirected	IntNetDB
571	BACH1	BTB and CNC homology 1, basic leucine zipper transcription factor 1	51279	C1RL	complement component 1, r subcomponent-like	TF->gene	TRANSFAC
6670	SP3	Sp3 transcription factor	645	BLVRB	biliverdin reductase B (flavin reductase (NADPH))	TF->gene	TRANSFAC
7392	USF2	upstream transcription factor 2, c-fos interacting	79154	MGC4172	short-chain dehydrogenase/reductase	TF->gene	TRANSFAC
6929	TCF3	transcription factor 3 (E2A immunoglobulin enhancer binding factors E12/E47)	2649	NR6A1	nuclear receptor subfamily 6, group A, member 1	TF->gene	TRANSFAC
3045	HBD	hemoglobin, delta	7504	XK	X-linked Kx blood group (McLeod syndrome)	Undirected	IntNetDB
11130	ZWINT	ZW10 interactor	5111	PCNA	proliferating cell nuclear antigen	Undirected	IntNetDB
6667	SP1	Sp1 transcription factor	92799	SHKBP1	SH3KBP1 binding protein 1	TF->gene	TRANSFAC
2995	GYPC	glycophorin C (Gerbich blood group)	645	BLVRB	biliverdin reductase B (flavin reductase (NADPH))	Undirected	IntNetDB
6670	SP3	Sp3 transcription factor	10098	TSPAN5	tetraspanin 5	TF->gene	TRANSFAC
6256	RXRA	retinoid X receptor, alpha	130026	ICA1L	islet cell autoantigen 1,69kDa-like	TF->gene	JASPAR
1544	CYP1A2	cytochrome P450, family 1, subfamily A, polypeptide 2	2109	ETFB	electron-transfer-flavoprotein, beta polypeptide	Undirected	IntNetDB
212	ALAS2	aminolevulinate, delta-, synthase 2	25793	FBXO7	F-box protein 7	Undirected	IntNetDB
hsa-miR-454	hsa-miR-454	hsa-miR-454	9334	B4GALT5	UDP-Gal:betaGlcNAc beta 1,4- galactosyltransferase, polypeptide 5	miRNA->gene	TargetScan
6667	SP1	Sp1 transcription factor	168455	FLJ36031	hypothetical protein FLJ36031	TF->gene	TRANSFAC
1051	CEBPB	CCAAT/enhancer binding protein (C/EBP), beta	3820	KLRB1	killer cell lectin-like receptor subfamily B, member 1	Undirected	IntNetDB
6223	RPS19	ribosomal protein S19	6189	RPS3A	ribosomal protein S3A	Undirected	STRING,IntNetDB
7392	USF2	upstream transcription factor 2, c-fos interacting	389136	VGLL3	vestigial like 3 (Drosophila)	TF->gene	TRANSFAC
645	BLVRB	biliverdin reductase B (flavin reductase (NADPH))	7504	XK	X-linked Kx blood group (McLeod syndrome)	Undirected	IntNetDB
317781	DDX51	DEAD (Asp-Glu-Ala-Asp) box polypeptide 51	65095	KRI1	KRI1 homolog (S. cerevisiae)	Undirected	IntNetDB
hsa-miR-124	hsa-miR-124	hsa-miR-124	203259	C9orf25	chromosome 9 open reading frame 25	miRNA->gene	TargetScan
2180	ACSL1	acyl-CoA synthetase long-chain family member 1	51	ACOX1	acyl-Coenzyme A oxidase 1, palmitoyl	KEGG directed	KEGG,STRING,IntNetDB
6722	SRF	serum response factor (c-fos serum response element-binding transcription factor)	79154	MGC4172	short-chain dehydrogenase/reductase	TF->gene	TRANSFAC
1051	CEBPB	CCAAT/enhancer binding protein (C/EBP), beta	9586	CREB5	cAMP responsive element binding protein 5	TF->gene	TRANSFAC
3045	HBD	hemoglobin, delta	51327	ERAF	erythroid associated factor	Undirected	IntNetDB
6203	RPS9	ribosomal protein S9	6161	RPL32	ribosomal protein L32	Undirected	STRING,IntNetDB
6136	RPL12	ribosomal protein L12	6160	RPL31	ribosomal protein L31	Undirected	IntNetDB
6203	RPS9	ribosomal protein S9	6169	RPL38	ribosomal protein L38	Undirected	STRING,IntNetDB
6203	RPS9	ribosomal protein S9	6168	RPL37A	ribosomal protein L37a	Undirected	STRING,IntNetDB
6667	SP1	Sp1 transcription factor	645	BLVRB	biliverdin reductase B (flavin reductase (NADPH))	TF->gene	TRANSFAC
11224	RPL35	ribosomal protein L35	6125	RPL5	ribosomal protein L5	Undirected	STRING,IntNetDB
11224	RPL35	ribosomal protein L35	6124	RPL4	ribosomal protein L4	Undirected	STRING,IntNetDB
10661	KLF1	Kruppel-like factor 1 (erythroid)	7001	PRDX2	peroxiredoxin 2	Undirected	IntNetDB
5498	PPOX	protoporphyrinogen oxidase	665	BNIP3L	BCL2/adenovirus E1B 19kDa interacting protein 3-like	Undirected	IntNetDB
2358	FPRL1	formyl peptide receptor 2	5473	PPBP	pro-platelet basic protein (chemokine (C-X-C motif) ligand 7)	Undirected	IntNetDB
6169	RPL38	ribosomal protein L38	6168	RPL37A	ribosomal protein L37a	Undirected	STRING,IntNetDB
8666	EIF3G	eukaryotic translation initiation factor 3, subunit G	6218	RPS17	ribosomal protein S17	Undirected	STRING,IntNetDB
23762	OSBP2	oxysterol binding protein 2	5498	PPOX	protoporphyrinogen oxidase	Undirected	IntNetDB
3045	HBD	hemoglobin, delta	51218	GLRX5	glutaredoxin 5	Undirected	IntNetDB
1385	CREB1	cAMP responsive element binding protein 1	5111	PCNA	proliferating cell nuclear antigen	Undirected	STRING
6670	SP3	Sp3 transcription factor	3191	HNRNPL	heterogeneous nuclear ribonucleoprotein L	TF->gene	TRANSFAC
6169	RPL38	ribosomal protein L38	6161	RPL32	ribosomal protein L32	Undirected	STRING,IntNetDB
3172	HNF4A	hepatocyte nuclear factor 4, alpha	56905	C15orf39	chromosome 15 open reading frame 39	TF->gene	TRANSFAC
10487	CAP1	CAP, adenylate cyclase-associated protein 1 (yeast)	6189	RPS3A	ribosomal protein S3A	Undirected	IntNetDB
2908	NR3C1	nuclear receptor subfamily 3, group C, member 1 (glucocorticoid receptor)	84833	USMG5	up-regulated during skeletal muscle growth 5 homolog (mouse)	TF->gene	TRANSFAC
1544	CYP1A2	cytochrome P450, family 1, subfamily A, polypeptide 2	2947	GSTM3	glutathione S-transferase M3 (brain)	KEGG directed	KEGG,STRING
1051	CEBPB	CCAAT/enhancer binding protein (C/EBP), beta	hsa-miR-454	hsa-miR-454	hsa-miR-454	TF->miRNA	TRANSFAC
6667	SP1	Sp1 transcription factor	4311	MME	membrane metallo-endopeptidase	TF->gene	TRANSFAC
25793	FBXO7	F-box protein 7	7504	XK	X-linked Kx blood group (McLeod syndrome)	Undirected	IntNetDB
157	ADRBK2	adrenergic, beta, receptor kinase 2	3579	IL8RB	interleukin 8 receptor, beta	KEGG directed	KEGG
2623	GATA1	GATA binding protein 1 (globin transcription factor 1)	645	BLVRB	biliverdin reductase B (flavin reductase (NADPH))	Undirected	IntNetDB
hsa-miR-320c	hsa-miR-320c	hsa-miR-320c	2908	NR3C1	nuclear receptor subfamily 3, group C, member 1 (glucocorticoid receptor)	miRNA->gene	TargetScan
6728	SRP19	signal recognition particle 19kDa	7027	TFDP1	transcription factor Dp-1	Undirected	STRING
2623	GATA1	GATA binding protein 1 (globin transcription factor 1)	1544	CYP1A2	cytochrome P450, family 1, subfamily A, polypeptide 2	TF->gene	TRANSFAC
2908	NR3C1	nuclear receptor subfamily 3, group C, member 1 (glucocorticoid receptor)	708	C1QBP	complement component 1, q subcomponent binding protein	Undirected	IntNetDB
57379	AICDA	activation-induced cytidine deaminase	978	CDA	cytidine deaminase	Undirected	STRING
1933	EEF1B2	eukaryotic translation elongation factor 1 beta 2	6176	RPLP1	ribosomal protein, large, P1	Undirected	IntNetDB
7039	TGFA	transforming growth factor, alpha	5111	PCNA	proliferating cell nuclear antigen	Undirected	STRING
6143	RPL19	ribosomal protein L19	6137	RPL13	ribosomal protein L13	Undirected	STRING,IntNetDB
6141	RPL18	ribosomal protein L18	6189	RPS3A	ribosomal protein S3A	Undirected	STRING,IntNetDB
hsa-miR-124	hsa-miR-124	hsa-miR-124	114805	GALNT13	UDP-N-acetyl-alpha-D-galactosamine:polypeptide N-acetylgalactosaminyltransferase 13 (GalNAc-T13)	miRNA->gene	TargetScan
6256	RXRA	retinoid X receptor, alpha	387700	SLC16A12	solute carrier family 16, member 12 (monocarboxylic acid transporter 12)	TF->gene	TRANSFAC,JASPAR
820	CAMP	cathelicidin antimicrobial peptide	3579	IL8RB	interleukin 8 receptor, beta	Undirected	STRING
2294	FOXF1	forkhead box F1	100132417	LOC100132417	Fc fragment of IgG, high affinity Ic, receptor (CD64)	TF->gene	TRANSFAC
6667	SP1	Sp1 transcription factor	83999	KREMEN1	kringle containing transmembrane protein 1	TF->gene	TRANSFAC
2908	NR3C1	nuclear receptor subfamily 3, group C, member 1 (glucocorticoid receptor)	6777	STAT5B	signal transducer and activator of transcription 5B	Undirected	STRING
6929	TCF3	transcription factor 3 (E2A immunoglobulin enhancer binding factors E12/E47)	309	ANXA6	annexin A6	TF->gene	TRANSFAC
1051	CEBPB	CCAAT/enhancer binding protein (C/EBP), beta	6777	STAT5B	signal transducer and activator of transcription 5B	Undirected	IntNetDB
hsa-miR-32	hsa-miR-32	hsa-miR-32	29841	GRHL1	grainyhead-like 1 (Drosophila)	miRNA->gene	PicTar,TargetScan
4807	NHLH1	nescient helix loop helix 1	51024	FIS1	fission 1 (mitochondrial outer membrane) homolog (S. cerevisiae)	TF->gene	TRANSFAC
84159	ARID5B	AT rich interactive domain 5B (MRF1-like)	3554	IL1R1	interleukin 1 receptor, type I	TF->gene	TRANSFAC
hsa-miR-320d	hsa-miR-320d	hsa-miR-320d	7165	TPD52L2	tumor protein D52-like 2	miRNA->gene	TargetScan
6137	RPL13	ribosomal protein L13	6124	RPL4	ribosomal protein L4	Undirected	STRING,IntNetDB
6668	SP2	Sp2 transcription factor	6136	RPL12	ribosomal protein L12	TF->gene	TRANSFAC
3693	ITGB5	integrin, beta 5	9846	GAB2	GRB2-associated binding protein 2	Undirected	IntNetDB
2649	NR6A1	nuclear receptor subfamily 6, group A, member 1	27161	EIF2C2	eukaryotic translation initiation factor 2C, 2	TF->gene	TRANSFAC
1051	CEBPB	CCAAT/enhancer binding protein (C/EBP), beta	346288	40800	septin 14	TF->gene	TRANSFAC
4899	NRF1	nuclear respiratory factor 1	64981	MRPL34	mitochondrial ribosomal protein L34	TF->gene	TRANSFAC
1593	CYP27A1	cytochrome P450, family 27, subfamily A, polypeptide 1	6718	AKR1D1	aldo-keto reductase family 1, member D1 (delta 4-3-ketosteroid-5-beta-reductase)	Undirected	IntNetDB
6667	SP1	Sp1 transcription factor	10174	SORBS3	sorbin and SH3 domain containing 3	TF->gene	TRANSFAC
23598	PATZ1	POZ (BTB) and AT hook containing zinc finger 1	999	CDH1	cadherin 1, type 1, E-cadherin (epithelial)	TF->gene	TRANSFAC
6670	SP3	Sp3 transcription factor	1267	CNP	2',3'-cyclic nucleotide 3' phosphodiesterase	TF->gene	TRANSFAC
1991	ELA2	elastase 2, neutrophil	5473	PPBP	pro-platelet basic protein (chemokine (C-X-C motif) ligand 7)	Undirected	STRING
7157	TP53	tumor protein p53	2176	FANCC	Fanconi anemia, complementation group C	Undirected	STRING
6133	RPL9	ribosomal protein L9	6136	RPL12	ribosomal protein L12	Undirected	IntNetDB
6133	RPL9	ribosomal protein L9	6137	RPL13	ribosomal protein L13	Undirected	IntNetDB
57019	CIAPIN1	cytokine induced apoptosis inhibitor 1	7178	TPT1	tumor protein, translationally-controlled 1	Undirected	IntNetDB
7392	USF2	upstream transcription factor 2, c-fos interacting	7320	UBE2B	ubiquitin-conjugating enzyme E2B (RAD6 homolog)	TF->gene	TRANSFAC
2038	EPB42	erythrocyte membrane protein band 4.2	8991	SELENBP1	selenium binding protein 1	Undirected	IntNetDB
5460	POU5F1	POU class 5 homeobox 1	11081	KERA	keratocan	TF->gene	TRANSFAC
2766	GMPR	guanosine monophosphate reductase	8531	CSDA	cold shock domain protein A	Undirected	IntNetDB
6205	RPS11	ribosomal protein S11	6203	RPS9	ribosomal protein S9	Undirected	STRING,IntNetDB
hsa-miR-33b	hsa-miR-33b	hsa-miR-33b	84159	ARID5B	AT rich interactive domain 5B (MRF1-like)	miRNA->gene	TargetScan
23598	PATZ1	POZ (BTB) and AT hook containing zinc finger 1	6777	STAT5B	signal transducer and activator of transcription 5B	TF->gene	TRANSFAC
6670	SP3	Sp3 transcription factor	6667	SP1	Sp1 transcription factor	TF->gene	TRANSFAC
6668	SP2	Sp2 transcription factor	83636	C19orf12	chromosome 19 open reading frame 12	TF->gene	TRANSFAC
405	ARNT	aryl hydrocarbon receptor nuclear translocator	4899	NRF1	nuclear respiratory factor 1	TF->gene	TRANSFAC
64411	CENTD3	centaurin, delta 3	89846	FGD3	FYVE, RhoGEF and PH domain containing 3	Undirected	STRING
hsa-miR-320c	hsa-miR-320c	hsa-miR-320c	6667	SP1	Sp1 transcription factor	miRNA->gene	TargetScan
1050	CEBPA	CCAAT/enhancer binding protein (C/EBP), alpha	6647	SOD1	superoxide dismutase 1, soluble	TF->gene	TRANSFAC
6160	RPL31	ribosomal protein L31	6166	RPL36AL	ribosomal protein L36a-like	Undirected	IntNetDB
4352	MPL	myeloproliferative leukemia virus oncogene	969	CD69	CD69 molecule	Undirected	IntNetDB
150274	HSCB	HscB iron-sulfur cluster co-chaperone homolog (E. coli)	292	SLC25A5	solute carrier family 25 (mitochondrial carrier; adenine nucleotide translocator), member 5	Undirected	IntNetDB
1385	CREB1	cAMP responsive element binding protein 1	3002	GZMB	granzyme B (granzyme 2, cytotoxic T-lymphocyte-associated serine esterase 1)	TF->gene	TRANSFAC
998	CDC42	cell division cycle 42 (GTP binding protein, 25kDa)	7316	UBC	ubiquitin C	Undirected	STRING
25793	FBXO7	F-box protein 7	9921	RNF10	ring finger protein 10	Undirected	IntNetDB
10261	IGSF6	immunoglobulin superfamily, member 6	7100	TLR5	toll-like receptor 5	Undirected	IntNetDB
hsa-miR-340	hsa-miR-340	hsa-miR-340	19	ABCA1	ATP-binding cassette, sub-family A (ABC1), member 1	miRNA->gene	TargetScan
6256	RXRA	retinoid X receptor, alpha	1191	CLU	clusterin	TF->gene	TRANSFAC
3039	HBA1	hemoglobin, alpha 1	51327	ERAF	erythroid associated factor	Undirected	STRING
9846	GAB2	GRB2-associated binding protein 2	5336	PLCG2	phospholipase C, gamma 2 (phosphatidylinositol-specific)	Undirected	STRING
2623	GATA1	GATA binding protein 1 (globin transcription factor 1)	83605	CCM2	cerebral cavernous malformation 2	TF->gene	TRANSFAC
4807	NHLH1	nescient helix loop helix 1	7320	UBE2B	ubiquitin-conjugating enzyme E2B (RAD6 homolog)	TF->gene	TRANSFAC
4807	NHLH1	nescient helix loop helix 1	309	ANXA6	annexin A6	TF->gene	TRANSFAC
6124	RPL4	ribosomal protein L4	6125	RPL5	ribosomal protein L5	Undirected	STRING,IntNetDB
6133	RPL9	ribosomal protein L9	9045	RPL14	ribosomal protein L14	Undirected	IntNetDB
6143	RPL19	ribosomal protein L19	7178	TPT1	tumor protein, translationally-controlled 1	Undirected	IntNetDB
7157	TP53	tumor protein p53	8718	TNFRSF25	tumor necrosis factor receptor superfamily, member 25	TF->gene	TRANSFAC
51547	SIRT7	sirtuin (silent mating type information regulation 2 homolog) 7 (S. cerevisiae)	6143	RPL19	ribosomal protein L19	Undirected	IntNetDB
4666	NACA	nascent polypeptide-associated complex alpha subunit	6133	RPL9	ribosomal protein L9	Undirected	IntNetDB
1054	CEBPG	CCAAT/enhancer binding protein (C/EBP), gamma	23604	DAPK2	death-associated protein kinase 2	TF->gene	TRANSFAC
4666	NACA	nascent polypeptide-associated complex alpha subunit	6136	RPL12	ribosomal protein L12	Undirected	IntNetDB
10261	IGSF6	immunoglobulin superfamily, member 6	64581	CLEC7A	C-type lectin domain family 7, member A	Undirected	IntNetDB
hsa-miR-320d	hsa-miR-320d	hsa-miR-320d	7431	VIM	vimentin	miRNA->gene	TargetScan
6670	SP3	Sp3 transcription factor	9586	CREB5	cAMP responsive element binding protein 5	TF->gene	TRANSFAC
6670	SP3	Sp3 transcription factor	112398	EGLN2	egl nine homolog 2 (C. elegans)	TF->gene	TRANSFAC
2996	GYPE	glycophorin E	7027	TFDP1	transcription factor Dp-1	Undirected	IntNetDB
23762	OSBP2	oxysterol binding protein 2	25793	FBXO7	F-box protein 7	Undirected	IntNetDB
4899	NRF1	nuclear respiratory factor 1	201163	FLCN	folliculin	TF->gene	TRANSFAC
6256	RXRA	retinoid X receptor, alpha	8029	CUBN	cubilin (intrinsic factor-cobalamin receptor)	TF->gene	JASPAR
6154	RPL26	ribosomal protein L26	6168	RPL37A	ribosomal protein L37a	Undirected	IntNetDB
6154	RPL26	ribosomal protein L26	6169	RPL38	ribosomal protein L38	Undirected	IntNetDB
6136	RPL12	ribosomal protein L12	6157	RPL27A	ribosomal protein L27a	Undirected	IntNetDB
6136	RPL12	ribosomal protein L12	6155	RPL27	ribosomal protein L27	Undirected	IntNetDB
6136	RPL12	ribosomal protein L12	6154	RPL26	ribosomal protein L26	Undirected	IntNetDB
hsa-miR-124	hsa-miR-124	hsa-miR-124	2771	GNAI2	guanine nucleotide binding protein (G protein), alpha inhibiting activity polypeptide 2	miRNA->gene	TargetScan
6154	RPL26	ribosomal protein L26	6160	RPL31	ribosomal protein L31	Undirected	IntNetDB
6154	RPL26	ribosomal protein L26	6161	RPL32	ribosomal protein L32	Undirected	IntNetDB
2623	GATA1	GATA binding protein 1 (globin transcription factor 1)	9990	SLC12A6	solute carrier family 12 (potassium/chloride transporters), member 6	TF->gene	TRANSFAC
1050	CEBPA	CCAAT/enhancer binding protein (C/EBP), alpha	55830	GLT8D1	glycosyltransferase 8 domain containing 1	TF->gene	TRANSFAC
6667	SP1	Sp1 transcription factor	83605	CCM2	cerebral cavernous malformation 2	TF->gene	TRANSFAC
2597	GAPDH	glyceraldehyde-3-phosphate dehydrogenase	5478	PPIA	peptidylprolyl isomerase A (cyclophilin A)	Undirected	STRING
4680	CEACAM6	carcinoembryonic antigen-related cell adhesion molecule 6 (non-specific cross reacting antigen)	1088	CEACAM8	carcinoembryonic antigen-related cell adhesion molecule 8	Undirected	STRING
4807	NHLH1	nescient helix loop helix 1	25798	BRI3	brain protein I3	TF->gene	JASPAR
hsa-miR-124	hsa-miR-124	hsa-miR-124	57104	PNPLA2	patatin-like phospholipase domain containing 2	miRNA->gene	TargetScan
3727	JUND	jun D proto-oncogene	27095	TRAPPC3	trafficking protein particle complex 3	TF->gene	TRANSFAC
6720	SREBF1	sterol regulatory element binding transcription factor 1	hsa-miR-1308	hsa-miR-1308	hsa-miR-1308	TF->miRNA	TRANSFAC
5901	RAN	RAN, member RAS oncogene family	6125	RPL5	ribosomal protein L5	Undirected	IntNetDB
hsa-miR-320b	hsa-miR-320b	hsa-miR-320b	6256	RXRA	retinoid X receptor, alpha	miRNA->gene	TargetScan
1052	CEBPD	CCAAT/enhancer binding protein (C/EBP), delta	136991	ASZ1	ankyrin repeat, SAM and basic leucine zipper domain containing 1	TF->gene	TRANSFAC
6155	RPL27	ribosomal protein L27	6176	RPLP1	ribosomal protein, large, P1	Undirected	STRING,IntNetDB
212	ALAS2	aminolevulinate, delta-, synthase 2	669	BPGM	2,3-bisphosphoglycerate mutase	Undirected	IntNetDB
212	ALAS2	aminolevulinate, delta-, synthase 2	665	BNIP3L	BCL2/adenovirus E1B 19kDa interacting protein 3-like	Undirected	IntNetDB
6223	RPS19	ribosomal protein S19	9141	PDCD5	programmed cell death 5	Undirected	IntNetDB
2109	ETFB	electron-transfer-flavoprotein, beta polypeptide	645	BLVRB	biliverdin reductase B (flavin reductase (NADPH))	Undirected	IntNetDB
1669	DEFA4	defensin, alpha 4, corticostatin	5473	PPBP	pro-platelet basic protein (chemokine (C-X-C motif) ligand 7)	Undirected	IntNetDB
hsa-miR-340	hsa-miR-340	hsa-miR-340	4303	FOXO4	forkhead box O4	miRNA->gene	TargetScan
10661	KLF1	Kruppel-like factor 1 (erythroid)	2038	EPB42	erythrocyte membrane protein band 4.2	Undirected	IntNetDB
2771	GNAI2	guanine nucleotide binding protein (G protein), alpha inhibiting activity polypeptide 2	10681	GNB5	guanine nucleotide binding protein (G protein), beta 5	Undirected	KEGG
hsa-miR-32	hsa-miR-32	hsa-miR-32	3848	KRT1	keratin 1	miRNA->gene	PicTar
5473	PPBP	pro-platelet basic protein (chemokine (C-X-C motif) ligand 7)	820	CAMP	cathelicidin antimicrobial peptide	Undirected	IntNetDB
6667	SP1	Sp1 transcription factor	2319	FLOT2	flotillin 2	TF->gene	TRANSFAC
10487	CAP1	CAP, adenylate cyclase-associated protein 1 (yeast)	23433	RHOQ	ras homolog gene family, member Q	Undirected	IntNetDB
2114	ETS2	v-ets erythroblastosis virus E26 oncogene homolog 2 (avian)	126432	FLJ45909	Ras and Rab interactor-like	TF->gene	TRANSFAC
6668	SP2	Sp2 transcription factor	85359	DGCR6L	DiGeorge syndrome critical region gene 6-like	TF->gene	TRANSFAC
5591	PRKDC	protein kinase, DNA-activated, catalytic polypeptide	3002	GZMB	granzyme B (granzyme 2, cytotoxic T-lymphocyte-associated serine esterase 1)	Undirected	STRING
6670	SP3	Sp3 transcription factor	339487	ZBTB8OS	zinc finger and BTB domain containing 8 opposite strand	TF->gene	TRANSFAC
1385	CREB1	cAMP responsive element binding protein 1	115330	GPR146	G protein-coupled receptor 146	TF->gene	TRANSFAC,JASPAR
1991	ELA2	elastase 2, neutrophil	7039	TGFA	transforming growth factor, alpha	Undirected	STRING
51327	ERAF	erythroid associated factor	5498	PPOX	protoporphyrinogen oxidase	Undirected	IntNetDB
6670	SP3	Sp3 transcription factor	51571	FAM49B	family with sequence similarity 49, member B	TF->gene	TRANSFAC
4318	MMP9	matrix metallopeptidase 9 (gelatinase B, 92kDa gelatinase, 92kDa type IV collagenase)	6668	SP2	Sp2 transcription factor	Undirected	STRING
637	BID	BH3 interacting domain death agonist	2114	ETS2	v-ets erythroblastosis virus E26 oncogene homolog 2 (avian)	Undirected	STRING
hsa-miR-29b	hsa-miR-29b	hsa-miR-29b	23500	DAAM2	dishevelled associated activator of morphogenesis 2	miRNA->gene	TargetScan
6189	RPS3A	ribosomal protein S3A	6168	RPL37A	ribosomal protein L37a	Undirected	STRING
6667	SP1	Sp1 transcription factor	2597	GAPDH	glyceraldehyde-3-phosphate dehydrogenase	TF->gene	TRANSFAC
4899	NRF1	nuclear respiratory factor 1	80097	FAM128B	family with sequence similarity 128, member B	TF->gene	TRANSFAC
hsa-miR-424	hsa-miR-424	hsa-miR-424	57568	SIPA1L2	signal-induced proliferation-associated 1 like 2	miRNA->gene	TargetScan
220972	MARCH8	membrane-associated ring finger (C3HC4) 8	2995	GYPC	glycophorin C (Gerbich blood group)	Undirected	IntNetDB
6773	STAT2	signal transducer and activator of transcription 2, 113kDa	6777	STAT5B	signal transducer and activator of transcription 5B	Undirected	IntNetDB
6720	SREBF1	sterol regulatory element binding transcription factor 1	5605	MAP2K2	mitogen-activated protein kinase kinase 2	TF->gene	TRANSFAC
6203	RPS9	ribosomal protein S9	6157	RPL27A	ribosomal protein L27a	Undirected	STRING,IntNetDB
6929	TCF3	transcription factor 3 (E2A immunoglobulin enhancer binding factors E12/E47)	6840	SVIL	supervillin	TF->gene	TRANSFAC
11224	RPL35	ribosomal protein L35	6133	RPL9	ribosomal protein L9	Undirected	IntNetDB
11224	RPL35	ribosomal protein L35	6136	RPL12	ribosomal protein L12	Undirected	IntNetDB
11224	RPL35	ribosomal protein L35	6137	RPL13	ribosomal protein L13	Undirected	STRING,IntNetDB
6647	SOD1	superoxide dismutase 1, soluble	7001	PRDX2	peroxiredoxin 2	Undirected	IntNetDB
2353	FOS	v-fos FBJ murine osteosarcoma viral oncogene homolog	637	BID	BH3 interacting domain death agonist	Undirected	STRING
212	ALAS2	aminolevulinate, delta-, synthase 2	2623	GATA1	GATA binding protein 1 (globin transcription factor 1)	Undirected	STRING
6256	RXRA	retinoid X receptor, alpha	55437	ALS2CR2	amyotrophic lateral sclerosis 2 (juvenile) chromosome region, candidate 2	TF->gene	JASPAR
8666	EIF3G	eukaryotic translation initiation factor 3, subunit G	6205	RPS11	ribosomal protein S11	Undirected	STRING,IntNetDB
2996	GYPE	glycophorin E	51218	GLRX5	glutaredoxin 5	Undirected	IntNetDB
4856	NOV	nephroblastoma overexpressed gene	7157	TP53	tumor protein p53	Undirected	STRING
1933	EEF1B2	eukaryotic translation elongation factor 1 beta 2	6143	RPL19	ribosomal protein L19	Undirected	IntNetDB
1050	CEBPA	CCAAT/enhancer binding protein (C/EBP), alpha	114991	ZNF618	zinc finger protein 618	TF->gene	TRANSFAC
2597	GAPDH	glyceraldehyde-3-phosphate dehydrogenase	5862	RAB2A	RAB2A, member RAS oncogene family	Undirected	STRING
2185	PTK2B	PTK2B protein tyrosine kinase 2 beta	2872	MKNK2	MAP kinase interacting serine/threonine kinase 2	Undirected	IntNetDB
2623	GATA1	GATA binding protein 1 (globin transcription factor 1)	80896	NPL	N-acetylneuraminate pyruvate lyase (dihydrodipicolinate synthase)	TF->gene	TRANSFAC
6667	SP1	Sp1 transcription factor	83853	ROPN1L	ropporin 1-like	TF->gene	TRANSFAC
292	SLC25A5	solute carrier family 25 (mitochondrial carrier; adenine nucleotide translocator), member 5	64981	MRPL34	mitochondrial ribosomal protein L34	Undirected	IntNetDB
1544	CYP1A2	cytochrome P450, family 1, subfamily A, polypeptide 2	6580	SLC22A1	solute carrier family 22 (organic cation transporter), member 1	Undirected	IntNetDB
6203	RPS9	ribosomal protein S9	7555	CNBP	CCHC-type zinc finger, nucleic acid binding protein	Undirected	IntNetDB
7157	TP53	tumor protein p53	2701	GJA4	gap junction protein, alpha 4, 37kDa	TF->gene	TRANSFAC
hsa-miR-124	hsa-miR-124	hsa-miR-124	282809	WDR51B	WD repeat domain 51B	miRNA->gene	TargetScan
11224	RPL35	ribosomal protein L35	23567	ZNF346	zinc finger protein 346	Undirected	IntNetDB
2995	GYPC	glycophorin C (Gerbich blood group)	6535	SLC6A8	solute carrier family 6 (neurotransmitter transporter, creatine), member 8	Undirected	IntNetDB
hsa-miR-301a	hsa-miR-301a	hsa-miR-301a	19	ABCA1	ATP-binding cassette, sub-family A (ABC1), member 1	miRNA->gene	TargetScan
6668	SP2	Sp2 transcription factor	571	BACH1	BTB and CNC homology 1, basic leucine zipper transcription factor 1	TF->gene	TRANSFAC
1593	CYP27A1	cytochrome P450, family 27, subfamily A, polypeptide 1	51599	LSR	lipolysis stimulated lipoprotein receptor	Undirected	IntNetDB
6668	SP2	Sp2 transcription factor	2649	NR6A1	nuclear receptor subfamily 6, group A, member 1	TF->gene	TRANSFAC
6668	SP2	Sp2 transcription factor	2319	FLOT2	flotillin 2	TF->gene	TRANSFAC
2919	CXCL1	chemokine (C-X-C motif) ligand 1 (melanoma growth stimulating activity, alpha)	7100	TLR5	toll-like receptor 5	Undirected	STRING
10098	TSPAN5	tetraspanin 5	2038	EPB42	erythrocyte membrane protein band 4.2	Undirected	IntNetDB
6203	RPS9	ribosomal protein S9	6208	RPS14	ribosomal protein S14	Undirected	STRING,IntNetDB
2908	NR3C1	nuclear receptor subfamily 3, group C, member 1 (glucocorticoid receptor)	147657	ZNF480	zinc finger protein 480	TF->gene	TRANSFAC
6141	RPL18	ribosomal protein L18	6191	RPS4X	ribosomal protein S4, X-linked	Undirected	STRING,IntNetDB
6668	SP2	Sp2 transcription factor	24140	FTSJ1	FtsJ homolog 1 (E. coli)	TF->gene	TRANSFAC
hsa-miR-340	hsa-miR-340	hsa-miR-340	7145	TNS1	tensin 1	miRNA->gene	TargetScan
6668	SP2	Sp2 transcription factor	4987	OPRL1	opiate receptor-like 1	TF->gene	TRANSFAC
4899	NRF1	nuclear respiratory factor 1	5478	PPIA	peptidylprolyl isomerase A (cyclophilin A)	TF->gene	TRANSFAC
2623	GATA1	GATA binding protein 1 (globin transcription factor 1)	2947	GSTM3	glutathione S-transferase M3 (brain)	TF->gene	TRANSFAC
6205	RPS11	ribosomal protein S11	6169	RPL38	ribosomal protein L38	Undirected	STRING,IntNetDB
4780	NFE2L2	nuclear factor (erythroid-derived 2)-like 2	7157	TP53	tumor protein p53	TF->gene	TRANSFAC
57646	USP28	ubiquitin specific peptidase 28	7316	UBC	ubiquitin C	Undirected	IntNetDB
1052	CEBPD	CCAAT/enhancer binding protein (C/EBP), delta	6161	RPL32	ribosomal protein L32	TF->gene	TRANSFAC
84159	ARID5B	AT rich interactive domain 5B (MRF1-like)	6256	RXRA	retinoid X receptor, alpha	TF->gene	TRANSFAC
1385	CREB1	cAMP responsive element binding protein 1	7157	TP53	tumor protein p53	Undirected	STRING
6668	SP2	Sp2 transcription factor	6124	RPL4	ribosomal protein L4	TF->gene	TRANSFAC
1385	CREB1	cAMP responsive element binding protein 1	55748	CNDP2	CNDP dipeptidase 2 (metallopeptidase M20 family)	TF->gene	TRANSFAC,JASPAR
2819	GPD1	glycerol-3-phosphate dehydrogenase 1 (soluble)	63924	CIDEC	cell death-inducing DFFA-like effector c	Undirected	IntNetDB
6205	RPS11	ribosomal protein S11	6176	RPLP1	ribosomal protein, large, P1	Undirected	STRING,IntNetDB
1052	CEBPD	CCAAT/enhancer binding protein (C/EBP), delta	6947	TCN1	transcobalamin I (vitamin B12 binding protein, R binder family)	TF->gene	TRANSFAC
5724	PTAFR	platelet-activating factor receptor	6279	S100A8	S100 calcium binding protein A8	Undirected	IntNetDB
10487	CAP1	CAP, adenylate cyclase-associated protein 1 (yeast)	8936	WASF1	WAS protein family, member 1	Undirected	IntNetDB
2039	EPB49	erythrocyte membrane protein band 4.9 (dematin)	8936	WASF1	WAS protein family, member 1	Undirected	IntNetDB
6777	STAT5B	signal transducer and activator of transcription 5B	4352	MPL	myeloproliferative leukemia virus oncogene	Undirected	STRING
6670	SP3	Sp3 transcription factor	116151	C20orf108	chromosome 20 open reading frame 108	TF->gene	TRANSFAC
2305	FOXM1	forkhead box M1	4318	MMP9	matrix metallopeptidase 9 (gelatinase B, 92kDa gelatinase, 92kDa type IV collagenase)	Undirected	STRING
2908	NR3C1	nuclear receptor subfamily 3, group C, member 1 (glucocorticoid receptor)	6168	RPL37A	ribosomal protein L37a	TF->gene	TRANSFAC
1991	ELA2	elastase 2, neutrophil	4318	MMP9	matrix metallopeptidase 9 (gelatinase B, 92kDa gelatinase, 92kDa type IV collagenase)	Undirected	STRING,IntNetDB
6668	SP2	Sp2 transcription factor	83999	KREMEN1	kringle containing transmembrane protein 1	TF->gene	TRANSFAC
5901	RAN	RAN, member RAS oncogene family	998	CDC42	cell division cycle 42 (GTP binding protein, 25kDa)	Undirected	IntNetDB
2114	ETS2	v-ets erythroblastosis virus E26 oncogene homolog 2 (avian)	64981	MRPL34	mitochondrial ribosomal protein L34	TF->gene	TRANSFAC
51327	ERAF	erythroid associated factor	2623	GATA1	GATA binding protein 1 (globin transcription factor 1)	Undirected	STRING,IntNetDB
2987	GUK1	guanylate kinase 1	353	APRT	adenine phosphoribosyltransferase	KEGG directed	KEGG
51218	GLRX5	glutaredoxin 5	7027	TFDP1	transcription factor Dp-1	Undirected	IntNetDB
11065	UBE2C	ubiquitin-conjugating enzyme E2C	997	CDC34	cell division cycle 34 homolog (S. cerevisiae)	Undirected	IntNetDB
405	ARNT	aryl hydrocarbon receptor nuclear translocator	54682	MANSC1	MANSC domain containing 1	TF->gene	TRANSFAC
571	BACH1	BTB and CNC homology 1, basic leucine zipper transcription factor 1	3930	LBR	lamin B receptor	TF->gene	TRANSFAC
3039	HBA1	hemoglobin, alpha 1	2623	GATA1	GATA binding protein 1 (globin transcription factor 1)	Undirected	STRING
6670	SP3	Sp3 transcription factor	4987	OPRL1	opiate receptor-like 1	TF->gene	TRANSFAC
84159	ARID5B	AT rich interactive domain 5B (MRF1-like)	55711	MLSTD1	fatty acyl CoA reductase 2	TF->gene	TRANSFAC
2358	FPRL1	formyl peptide receptor 2	6279	S100A8	S100 calcium binding protein A8	Undirected	IntNetDB
3820	KLRB1	killer cell lectin-like receptor subfamily B, member 1	6653	SORL1	sortilin-related receptor, L(DLR class) A repeats-containing	Undirected	IntNetDB
6667	SP1	Sp1 transcription factor	10098	TSPAN5	tetraspanin 5	TF->gene	TRANSFAC
405	ARNT	aryl hydrocarbon receptor nuclear translocator	83605	CCM2	cerebral cavernous malformation 2	TF->gene	TRANSFAC
23598	PATZ1	POZ (BTB) and AT hook containing zinc finger 1	7169	TPM2	tropomyosin 2 (beta)	TF->gene	TRANSFAC
2176	FANCC	Fanconi anemia, complementation group C	5610	EIF2AK2	eukaryotic translation initiation factor 2-alpha kinase 2	Undirected	STRING
7157	TP53	tumor protein p53	7920	BAT5	HLA-B associated transcript 5	TF->gene	TRANSFAC
2114	ETS2	v-ets erythroblastosis virus E26 oncogene homolog 2 (avian)	55629	PNRC2	proline-rich nuclear receptor coactivator 2	TF->gene	TRANSFAC
728	C5AR1	complement component 5a receptor 1	8843	GPR109B	G protein-coupled receptor 109B	Undirected	IntNetDB
6668	SP2	Sp2 transcription factor	100129250	LOC100129250	similar to hCG1811779	TF->gene	TRANSFAC
10661	KLF1	Kruppel-like factor 1 (erythroid)	7504	XK	X-linked Kx blood group (McLeod syndrome)	Undirected	IntNetDB
6668	SP2	Sp2 transcription factor	168455	FLJ36031	hypothetical protein FLJ36031	TF->gene	TRANSFAC
6668	SP2	Sp2 transcription factor	124590	USH1G	Usher syndrome 1G (autosomal recessive)	TF->gene	TRANSFAC
6124	RPL4	ribosomal protein L4	6157	RPL27A	ribosomal protein L27a	Undirected	STRING,IntNetDB
6124	RPL4	ribosomal protein L4	6154	RPL26	ribosomal protein L26	Undirected	IntNetDB
6154	RPL26	ribosomal protein L26	9045	RPL14	ribosomal protein L14	Undirected	IntNetDB
6667	SP1	Sp1 transcription factor	51571	FAM49B	family with sequence similarity 49, member B	TF->gene	TRANSFAC
5901	RAN	RAN, member RAS oncogene family	6205	RPS11	ribosomal protein S11	Undirected	IntNetDB
hsa-miR-124	hsa-miR-124	hsa-miR-124	56996	SLC12A9	solute carrier family 12 (potassium/chloride transporters), member 9	miRNA->gene	TargetScan
6256	RXRA	retinoid X receptor, alpha	4051	CYP4F3	cytochrome P450, family 4, subfamily F, polypeptide 3	TF->gene	JASPAR
1050	CEBPA	CCAAT/enhancer binding protein (C/EBP), alpha	6580	SLC22A1	solute carrier family 22 (organic cation transporter), member 1	Undirected	IntNetDB
2766	GMPR	guanosine monophosphate reductase	645	BLVRB	biliverdin reductase B (flavin reductase (NADPH))	Undirected	IntNetDB
4780	NFE2L2	nuclear factor (erythroid-derived 2)-like 2	4898	NRD1	nardilysin (N-arginine dibasic convertase)	TF->gene	TRANSFAC,JASPAR
6720	SREBF1	sterol regulatory element binding transcription factor 1	9694	TTC35	tetratricopeptide repeat domain 35	TF->gene	TRANSFAC
60	ACTB	actin, beta	3662	IRF4	interferon regulatory factor 4	Undirected	STRING
6124	RPL4	ribosomal protein L4	9045	RPL14	ribosomal protein L14	Undirected	STRING,IntNetDB
6667	SP1	Sp1 transcription factor	1043	CD52	CD52 molecule	TF->gene	TRANSFAC
2908	NR3C1	nuclear receptor subfamily 3, group C, member 1 (glucocorticoid receptor)	84681	HINT2	histidine triad nucleotide binding protein 2	TF->gene	JASPAR
6521	SLC4A1	solute carrier family 4, anion exchanger, member 1 (erythrocyte membrane protein band 3, Diego blood group)	7027	TFDP1	transcription factor Dp-1	Undirected	IntNetDB
1050	CEBPA	CCAAT/enhancer binding protein (C/EBP), alpha	340547	VSIG1	V-set and immunoglobulin domain containing 1	TF->gene	TRANSFAC
6929	TCF3	transcription factor 3 (E2A immunoglobulin enhancer binding factors E12/E47)	113402	SFT2D1	SFT2 domain containing 1	TF->gene	TRANSFAC
6161	RPL32	ribosomal protein L32	6189	RPS3A	ribosomal protein S3A	Undirected	STRING,IntNetDB
6154	RPL26	ribosomal protein L26	6176	RPLP1	ribosomal protein, large, P1	Undirected	IntNetDB
6929	TCF3	transcription factor 3 (E2A immunoglobulin enhancer binding factors E12/E47)	162966	ZNF600	zinc finger protein 600	TF->gene	TRANSFAC
1998	ELF2	E74-like factor 2 (ets domain transcription factor)	113402	SFT2D1	SFT2 domain containing 1	TF->gene	TRANSFAC
11224	RPL35	ribosomal protein L35	4666	NACA	nascent polypeptide-associated complex alpha subunit	Undirected	IntNetDB
2781	GNAZ	guanine nucleotide binding protein (G protein), alpha z polypeptide	2771	GNAI2	guanine nucleotide binding protein (G protein), alpha inhibiting activity polypeptide 2	Undirected	STRING
6670	SP3	Sp3 transcription factor	6124	RPL4	ribosomal protein L4	TF->gene	TRANSFAC
3172	HNF4A	hepatocyte nuclear factor 4, alpha	387700	SLC16A12	solute carrier family 16, member 12 (monocarboxylic acid transporter 12)	TF->gene	TRANSFAC
hsa-miR-19b	hsa-miR-19b	hsa-miR-19b	3482	IGF2R	insulin-like growth factor 2 receptor	miRNA->gene	PicTar,TargetScan
212	ALAS2	aminolevulinate, delta-, synthase 2	6521	SLC4A1	solute carrier family 4, anion exchanger, member 1 (erythrocyte membrane protein band 3, Diego blood group)	Undirected	IntNetDB
7504	XK	X-linked Kx blood group (McLeod syndrome)	8991	SELENBP1	selenium binding protein 1	Undirected	IntNetDB
1998	ELF2	E74-like factor 2 (ets domain transcription factor)	64981	MRPL34	mitochondrial ribosomal protein L34	TF->gene	TRANSFAC
6655	SOS2	son of sevenless homolog 2 (Drosophila)	598	BCL2L1	BCL2-like 1	KEGG directed	KEGG
5498	PPOX	protoporphyrinogen oxidase	7001	PRDX2	peroxiredoxin 2	Undirected	IntNetDB
11186	RASSF1	Ras association (RalGDS/AF-6) domain family member 1	9047	SH2D2A	SH2 domain protein 2A	Undirected	IntNetDB
10402	ST3GAL6	ST3 beta-galactoside alpha-2,3-sialyltransferase 6	84002	B3GNT5	UDP-GlcNAc:betaGal beta-1,3-N-acetylglucosaminyltransferase 5	Undirected	IntNetDB
3727	JUND	jun D proto-oncogene	344967	LOC344967	acyl-CoA thioesterase 7-like	TF->gene	TRANSFAC
3554	IL1R1	interleukin 1 receptor, type I	9173	IL1RL1	interleukin 1 receptor-like 1	Undirected	IntNetDB
6203	RPS9	ribosomal protein S9	9045	RPL14	ribosomal protein L14	Undirected	STRING,IntNetDB
3727	JUND	jun D proto-oncogene	401563	C9orf139	chromosome 9 open reading frame 139	TF->gene	TRANSFAC
23762	OSBP2	oxysterol binding protein 2	51327	ERAF	erythroid associated factor	Undirected	IntNetDB
6256	RXRA	retinoid X receptor, alpha	169026	SLC30A8	solute carrier family 30 (zinc transporter), member 8	TF->gene	JASPAR
9173	IL1RL1	interleukin 1 receptor-like 1	2321	FLT1	fms-related tyrosine kinase 1 (vascular endothelial growth factor/vascular permeability factor receptor)	Undirected	STRING
6133	RPL9	ribosomal protein L9	6208	RPS14	ribosomal protein S14	Undirected	IntNetDB
5460	POU5F1	POU class 5 homeobox 1	8460	TPST1	tyrosylprotein sulfotransferase 1	TF->gene	TRANSFAC
5591	PRKDC	protein kinase, DNA-activated, catalytic polypeptide	3014	H2AFX	H2A histone family, member X	Undirected	STRING
2038	EPB42	erythrocyte membrane protein band 4.2	212	ALAS2	aminolevulinate, delta-, synthase 2	Undirected	IntNetDB
6929	TCF3	transcription factor 3 (E2A immunoglobulin enhancer binding factors E12/E47)	6141	RPL18	ribosomal protein L18	TF->gene	TRANSFAC
6205	RPS11	ribosomal protein S11	6168	RPL37A	ribosomal protein L37a	Undirected	STRING,IntNetDB
hsa-miR-19b	hsa-miR-19b	hsa-miR-19b	9732	DOCK4	dedicator of cytokinesis 4	miRNA->gene	TargetScan
4780	NFE2L2	nuclear factor (erythroid-derived 2)-like 2	51279	C1RL	complement component 1, r subcomponent-like	TF->gene	TRANSFAC
6722	SRF	serum response factor (c-fos serum response element-binding transcription factor)	5591	PRKDC	protein kinase, DNA-activated, catalytic polypeptide	Undirected	STRING
6929	TCF3	transcription factor 3 (E2A immunoglobulin enhancer binding factors E12/E47)	9651	PLCH2	phospholipase C, eta 2	TF->gene	TRANSFAC
6929	TCF3	transcription factor 3 (E2A immunoglobulin enhancer binding factors E12/E47)	2681	GGTA1	glycoprotein, alpha-galactosyltransferase 1	TF->gene	TRANSFAC
1998	ELF2	E74-like factor 2 (ets domain transcription factor)	29997	GLTSCR2	glioma tumor suppressor candidate region gene 2	TF->gene	TRANSFAC
hsa-miR-124	hsa-miR-124	hsa-miR-124	6668	SP2	Sp2 transcription factor	miRNA->gene	TargetScan
3727	JUND	jun D proto-oncogene	83442	SH3BGRL3	SH3 domain binding glutamic acid-rich protein like 3	TF->gene	TRANSFAC
6155	RPL27	ribosomal protein L27	6169	RPL38	ribosomal protein L38	Undirected	STRING,IntNetDB
6155	RPL27	ribosomal protein L27	6168	RPL37A	ribosomal protein L37a	Undirected	STRING,IntNetDB
6155	RPL27	ribosomal protein L27	6166	RPL36AL	ribosomal protein L36a-like	Undirected	IntNetDB
6777	STAT5B	signal transducer and activator of transcription 5B	100132417	LOC100132417	Fc fragment of IgG, high affinity Ic, receptor (CD64)	TF->gene	TRANSFAC
hsa-miR-124	hsa-miR-124	hsa-miR-124	6667	SP1	Sp1 transcription factor	miRNA->gene	TargetScan
6155	RPL27	ribosomal protein L27	6161	RPL32	ribosomal protein L32	Undirected	STRING,IntNetDB
6155	RPL27	ribosomal protein L27	6160	RPL31	ribosomal protein L31	Undirected	STRING,IntNetDB
1593	CYP27A1	cytochrome P450, family 27, subfamily A, polypeptide 1	4051	CYP4F3	cytochrome P450, family 4, subfamily F, polypeptide 3	Undirected	IntNetDB
6189	RPS3A	ribosomal protein S3A	6191	RPS4X	ribosomal protein S4, X-linked	Undirected	STRING,IntNetDB
5498	PPOX	protoporphyrinogen oxidase	645	BLVRB	biliverdin reductase B (flavin reductase (NADPH))	Undirected	IntNetDB
2995	GYPC	glycophorin C (Gerbich blood group)	51327	ERAF	erythroid associated factor	Undirected	IntNetDB
2771	GNAI2	guanine nucleotide binding protein (G protein), alpha inhibiting activity polypeptide 2	728	C5AR1	complement component 5a receptor 1	Undirected	STRING
6668	SP2	Sp2 transcription factor	84981	C17orf91	chromosome 17 open reading frame 91	TF->gene	TRANSFAC
6722	SRF	serum response factor (c-fos serum response element-binding transcription factor)	6840	SVIL	supervillin	TF->gene	TRANSFAC
hsa-miR-142-3p	hsa-miR-142-3p	hsa-miR-142-3p	114991	ZNF618	zinc finger protein 618	miRNA->gene	TargetScan
2623	GATA1	GATA binding protein 1 (globin transcription factor 1)	5498	PPOX	protoporphyrinogen oxidase	Undirected	IntNetDB
2038	EPB42	erythrocyte membrane protein band 4.2	23762	OSBP2	oxysterol binding protein 2	Undirected	IntNetDB
1933	EEF1B2	eukaryotic translation elongation factor 1 beta 2	6157	RPL27A	ribosomal protein L27a	Undirected	IntNetDB
1933	EEF1B2	eukaryotic translation elongation factor 1 beta 2	6155	RPL27	ribosomal protein L27	Undirected	IntNetDB
3172	HNF4A	hepatocyte nuclear factor 4, alpha	4601	MXI1	MAX interactor 1	TF->gene	TRANSFAC
27161	EIF2C2	eukaryotic translation initiation factor 2C, 2	8666	EIF3G	eukaryotic translation initiation factor 3, subunit G	Undirected	IntNetDB
6141	RPL18	ribosomal protein L18	6218	RPS17	ribosomal protein S17	Undirected	STRING,IntNetDB
2114	ETS2	v-ets erythroblastosis virus E26 oncogene homolog 2 (avian)	57705	WDFY4	WDFY family member 4	TF->gene	TRANSFAC
314	AOC2	amine oxidase, copper containing 2 (retina-specific)	7157	TP53	tumor protein p53	Undirected	IntNetDB
6256	RXRA	retinoid X receptor, alpha	55629	PNRC2	proline-rich nuclear receptor coactivator 2	Undirected	STRING
6929	TCF3	transcription factor 3 (E2A immunoglobulin enhancer binding factors E12/E47)	171558	PTCRA	pre T-cell antigen receptor alpha	TF->gene	TRANSFAC
5460	POU5F1	POU class 5 homeobox 1	2114	ETS2	v-ets erythroblastosis virus E26 oncogene homolog 2 (avian)	Undirected	STRING
598	BCL2L1	BCL2-like 1	665	BNIP3L	BCL2/adenovirus E1B 19kDa interacting protein 3-like	Undirected	IntNetDB
hsa-miR-33b	hsa-miR-33b	hsa-miR-33b	677	ZFP36L1	zinc finger protein 36, C3H type-like 1	miRNA->gene	TargetScan
23598	PATZ1	POZ (BTB) and AT hook containing zinc finger 1	11224	RPL35	ribosomal protein L35	TF->gene	TRANSFAC
2995	GYPC	glycophorin C (Gerbich blood group)	6521	SLC4A1	solute carrier family 4, anion exchanger, member 1 (erythrocyte membrane protein band 3, Diego blood group)	Undirected	IntNetDB
7157	TP53	tumor protein p53	5111	PCNA	proliferating cell nuclear antigen	Undirected	STRING
hsa-miR-33a	hsa-miR-33a	hsa-miR-33a	677	ZFP36L1	zinc finger protein 36, C3H type-like 1	miRNA->gene	TargetScan
23762	OSBP2	oxysterol binding protein 2	6521	SLC4A1	solute carrier family 4, anion exchanger, member 1 (erythrocyte membrane protein band 3, Diego blood group)	Undirected	IntNetDB
7392	USF2	upstream transcription factor 2, c-fos interacting	85359	DGCR6L	DiGeorge syndrome critical region gene 6-like	TF->gene	TRANSFAC
1051	CEBPB	CCAAT/enhancer binding protein (C/EBP), beta	7178	TPT1	tumor protein, translationally-controlled 1	Undirected	IntNetDB
1385	CREB1	cAMP responsive element binding protein 1	4066	LYL1	lymphoblastic leukemia derived sequence 1	Undirected	STRING
1486	CTBS	chitobiase, di-N-acetyl-	3482	IGF2R	insulin-like growth factor 2 receptor	Undirected	IntNetDB
6667	SP1	Sp1 transcription factor	79862	ZNF669	zinc finger protein 669	TF->gene	TRANSFAC
7316	UBC	ubiquitin C	3014	H2AFX	H2A histone family, member X	Undirected	STRING
hsa-miR-301a	hsa-miR-301a	hsa-miR-301a	9586	CREB5	cAMP responsive element binding protein 5	miRNA->gene	TargetScan
10261	IGSF6	immunoglobulin superfamily, member 6	200315	APOBEC3A	apolipoprotein B mRNA editing enzyme, catalytic polypeptide-like 3A	Undirected	IntNetDB
5460	POU5F1	POU class 5 homeobox 1	6580	SLC22A1	solute carrier family 22 (organic cation transporter), member 1	Undirected	STRING
6667	SP1	Sp1 transcription factor	25798	BRI3	brain protein I3	TF->gene	TRANSFAC
7157	TP53	tumor protein p53	8870	IER3	immediate early response 3	TF->gene	TRANSFAC
708	C1QBP	complement component 1, q subcomponent binding protein	710	SERPING1	serpin peptidase inhibitor, clade G (C1 inhibitor), member 1	Undirected	STRING
645	BLVRB	biliverdin reductase B (flavin reductase (NADPH))	8991	SELENBP1	selenium binding protein 1	Undirected	IntNetDB
1051	CEBPB	CCAAT/enhancer binding protein (C/EBP), beta	hsa-miR-301a	hsa-miR-301a	hsa-miR-301a	TF->miRNA	TRANSFAC
1054	CEBPG	CCAAT/enhancer binding protein (C/EBP), gamma	965	CD58	CD58 molecule	TF->gene	TRANSFAC
5460	POU5F1	POU class 5 homeobox 1	51024	FIS1	fission 1 (mitochondrial outer membrane) homolog (S. cerevisiae)	TF->gene	TRANSFAC
6205	RPS11	ribosomal protein S11	6191	RPS4X	ribosomal protein S4, X-linked	Undirected	STRING,IntNetDB
405	ARNT	aryl hydrocarbon receptor nuclear translocator	1854	DUT	deoxyuridine triphosphatase	TF->gene	JASPAR
1054	CEBPG	CCAAT/enhancer binding protein (C/EBP), gamma	143686	SESN3	sestrin 3	TF->gene	TRANSFAC
hsa-miR-503	hsa-miR-503	hsa-miR-503	57568	SIPA1L2	signal-induced proliferation-associated 1 like 2	miRNA->gene	TargetScan
1054	CEBPG	CCAAT/enhancer binding protein (C/EBP), gamma	100132417	LOC100132417	Fc fragment of IgG, high affinity Ic, receptor (CD64)	TF->gene	TRANSFAC
6205	RPS11	ribosomal protein S11	6208	RPS14	ribosomal protein S14	Undirected	STRING,IntNetDB
6143	RPL19	ribosomal protein L19	6208	RPS14	ribosomal protein S14	Undirected	STRING,IntNetDB
4899	NRF1	nuclear respiratory factor 1	11186	RASSF1	Ras association (RalGDS/AF-6) domain family member 1	TF->gene	TRANSFAC
6143	RPL19	ribosomal protein L19	6203	RPS9	ribosomal protein S9	Undirected	STRING,IntNetDB
6143	RPL19	ribosomal protein L19	6205	RPS11	ribosomal protein S11	Undirected	STRING,IntNetDB
969	CD69	CD69 molecule	1088	CEACAM8	carcinoembryonic antigen-related cell adhesion molecule 8	Undirected	STRING
4899	NRF1	nuclear respiratory factor 1	57035	C1orf63	chromosome 1 open reading frame 63	TF->gene	TRANSFAC
3727	JUND	jun D proto-oncogene	4318	MMP9	matrix metallopeptidase 9 (gelatinase B, 92kDa gelatinase, 92kDa type IV collagenase)	TF->gene	TRANSFAC
6133	RPL9	ribosomal protein L9	6157	RPL27A	ribosomal protein L27a	Undirected	IntNetDB
6133	RPL9	ribosomal protein L9	6154	RPL26	ribosomal protein L26	Undirected	IntNetDB
6133	RPL9	ribosomal protein L9	6155	RPL27	ribosomal protein L27	Undirected	IntNetDB
6155	RPL27	ribosomal protein L27	7555	CNBP	CCHC-type zinc finger, nucleic acid binding protein	Undirected	IntNetDB
60	ACTB	actin, beta	7171	TPM4	tropomyosin 4	Undirected	IntNetDB
6668	SP2	Sp2 transcription factor	9086	EIF1AY	eukaryotic translation initiation factor 1A, Y-linked	TF->gene	TRANSFAC
1051	CEBPB	CCAAT/enhancer binding protein (C/EBP), beta	392490	FLJ44635	TPT1-like protein	TF->gene	TRANSFAC
2294	FOXF1	forkhead box F1	55534	MAML3	mastermind-like 3 (Drosophila)	TF->gene	TRANSFAC
6667	SP1	Sp1 transcription factor	10849	CD3EAP	CD3e molecule, epsilon associated protein	TF->gene	TRANSFAC
6929	TCF3	transcription factor 3 (E2A immunoglobulin enhancer binding factors E12/E47)	256586	LYSMD2	LysM, putative peptidoglycan-binding, domain containing 2	TF->gene	TRANSFAC
405	ARNT	aryl hydrocarbon receptor nuclear translocator	339175	METTL2A	methyltransferase like 2A	TF->gene	JASPAR
2321	FLT1	fms-related tyrosine kinase 1 (vascular endothelial growth factor/vascular permeability factor receptor)	2185	PTK2B	PTK2B protein tyrosine kinase 2 beta	Undirected	STRING
23598	PATZ1	POZ (BTB) and AT hook containing zinc finger 1	23433	RHOQ	ras homolog gene family, member Q	TF->gene	TRANSFAC
4807	NHLH1	nescient helix loop helix 1	9208	LRRFIP1	leucine rich repeat (in FLII) interacting protein 1	TF->gene	JASPAR
710	SERPING1	serpin peptidase inhibitor, clade G (C1 inhibitor), member 1	728	C5AR1	complement component 5a receptor 1	Undirected	STRING,IntNetDB
2114	ETS2	v-ets erythroblastosis virus E26 oncogene homolog 2 (avian)	4067	LYN	v-yes-1 Yamaguchi sarcoma viral related oncogene homolog	TF->gene	TRANSFAC
hsa-miR-320c	hsa-miR-320c	hsa-miR-320c	6391	SDHC	succinate dehydrogenase complex, subunit C, integral membrane protein, 15kDa	miRNA->gene	TargetScan
6137	RPL13	ribosomal protein L13	6125	RPL5	ribosomal protein L5	Undirected	STRING,IntNetDB
4666	NACA	nascent polypeptide-associated complex alpha subunit	9045	RPL14	ribosomal protein L14	Undirected	IntNetDB
6141	RPL18	ribosomal protein L18	6143	RPL19	ribosomal protein L19	Undirected	STRING,IntNetDB
4303	FOXO4	forkhead box O4	9990	SLC12A6	solute carrier family 12 (potassium/chloride transporters), member 6	TF->gene	TRANSFAC
6133	RPL9	ribosomal protein L9	7555	CNBP	CCHC-type zinc finger, nucleic acid binding protein	Undirected	IntNetDB
hsa-miR-454	hsa-miR-454	hsa-miR-454	58528	RRAGD	Ras-related GTP binding D	miRNA->gene	TargetScan
25793	FBXO7	F-box protein 7	5498	PPOX	protoporphyrinogen oxidase	Undirected	IntNetDB
2908	NR3C1	nuclear receptor subfamily 3, group C, member 1 (glucocorticoid receptor)	hsa-miR-134	hsa-miR-134	hsa-miR-134	TF->miRNA	JASPAR
hsa-miR-223	hsa-miR-223	hsa-miR-223	6670	SP3	Sp3 transcription factor	miRNA->gene	PicTar,TargetScan
1052	CEBPD	CCAAT/enhancer binding protein (C/EBP), delta	762	CA4	carbonic anhydrase IV	TF->gene	TRANSFAC
6667	SP1	Sp1 transcription factor	2114	ETS2	v-ets erythroblastosis virus E26 oncogene homolog 2 (avian)	Undirected	STRING
10661	KLF1	Kruppel-like factor 1 (erythroid)	212	ALAS2	aminolevulinate, delta-, synthase 2	Undirected	STRING,IntNetDB
860	RUNX2	runt-related transcription factor 2	7320	UBE2B	ubiquitin-conjugating enzyme E2B (RAD6 homolog)	TF->gene	TRANSFAC
7157	TP53	tumor protein p53	7039	TGFA	transforming growth factor, alpha	Undirected	STRING
2353	FOS	v-fos FBJ murine osteosarcoma viral oncogene homolog	5111	PCNA	proliferating cell nuclear antigen	Undirected	STRING
1050	CEBPA	CCAAT/enhancer binding protein (C/EBP), alpha	4780	NFE2L2	nuclear factor (erythroid-derived 2)-like 2	TF->gene	TRANSFAC
6166	RPL36AL	ribosomal protein L36a-like	6223	RPS19	ribosomal protein S19	Undirected	IntNetDB
728	C5AR1	complement component 5a receptor 1	240	ALOX5	arachidonate 5-lipoxygenase	Undirected	STRING
6670	SP3	Sp3 transcription factor	6282	S100A11	S100 calcium binding protein A11	TF->gene	TRANSFAC
65008	MRPL1	mitochondrial ribosomal protein L1	84545	MRPL43	mitochondrial ribosomal protein L43	Undirected	IntNetDB
7167	TPI1	triosephosphate isomerase 1	2597	GAPDH	glyceraldehyde-3-phosphate dehydrogenase	KEGG directed	KEGG,IntNetDB
23598	PATZ1	POZ (BTB) and AT hook containing zinc finger 1	79862	ZNF669	zinc finger protein 669	TF->gene	TRANSFAC
5724	PTAFR	platelet-activating factor receptor	8843	GPR109B	G protein-coupled receptor 109B	Undirected	IntNetDB
6667	SP1	Sp1 transcription factor	64843	ISL2	ISL LIM homeobox 2	TF->gene	TRANSFAC
6667	SP1	Sp1 transcription factor	1051	CEBPB	CCAAT/enhancer binding protein (C/EBP), beta	TF->gene	TRANSFAC
6929	TCF3	transcription factor 3 (E2A immunoglobulin enhancer binding factors E12/E47)	2908	NR3C1	nuclear receptor subfamily 3, group C, member 1 (glucocorticoid receptor)	TF->gene	TRANSFAC
405	ARNT	aryl hydrocarbon receptor nuclear translocator	1669	DEFA4	defensin, alpha 4, corticostatin	TF->gene	TRANSFAC
1054	CEBPG	CCAAT/enhancer binding protein (C/EBP), gamma	3047	HBG1	hemoglobin, gamma A	TF->gene	TRANSFAC
1054	CEBPG	CCAAT/enhancer binding protein (C/EBP), gamma	3048	HBG2	hemoglobin, gamma G	TF->gene	TRANSFAC
6136	RPL12	ribosomal protein L12	6137	RPL13	ribosomal protein L13	Undirected	IntNetDB
6667	SP1	Sp1 transcription factor	90338	ZNF160	zinc finger protein 160	TF->gene	TRANSFAC
6722	SRF	serum response factor (c-fos serum response element-binding transcription factor)	60	ACTB	actin, beta	TF->gene	TRANSFAC
6157	RPL27A	ribosomal protein L27a	6125	RPL5	ribosomal protein L5	Undirected	STRING,IntNetDB
2623	GATA1	GATA binding protein 1 (globin transcription factor 1)	6141	RPL18	ribosomal protein L18	TF->gene	TRANSFAC
5610	EIF2AK2	eukaryotic translation initiation factor 2-alpha kinase 2	9208	LRRFIP1	leucine rich repeat (in FLII) interacting protein 1	Undirected	IntNetDB
405	ARNT	aryl hydrocarbon receptor nuclear translocator	6667	SP1	Sp1 transcription factor	Undirected	IntNetDB
6670	SP3	Sp3 transcription factor	6136	RPL12	ribosomal protein L12	TF->gene	TRANSFAC
84159	ARID5B	AT rich interactive domain 5B (MRF1-like)	8843	GPR109B	G protein-coupled receptor 109B	TF->gene	TRANSFAC
240	ALOX5	arachidonate 5-lipoxygenase	5724	PTAFR	platelet-activating factor receptor	Undirected	IntNetDB
7157	TP53	tumor protein p53	966	CD59	CD59 molecule, complement regulatory protein	Undirected	STRING
2294	FOXF1	forkhead box F1	9990	SLC12A6	solute carrier family 12 (potassium/chloride transporters), member 6	TF->gene	TRANSFAC
3684	ITGAM	integrin, alpha M (complement component 3 receptor 3 subunit)	8516	ITGA8	integrin, alpha 8	Undirected	STRING
6133	RPL9	ribosomal protein L9	6205	RPS11	ribosomal protein S11	Undirected	IntNetDB
6133	RPL9	ribosomal protein L9	6203	RPS9	ribosomal protein S9	Undirected	IntNetDB
1054	CEBPG	CCAAT/enhancer binding protein (C/EBP), gamma	2353	FOS	v-fos FBJ murine osteosarcoma viral oncogene homolog	Undirected	STRING,IntNetDB
1052	CEBPD	CCAAT/enhancer binding protein (C/EBP), delta	286826	LIN9	lin-9 homolog (C. elegans)	TF->gene	TRANSFAC
6777	STAT5B	signal transducer and activator of transcription 5B	2353	FOS	v-fos FBJ murine osteosarcoma viral oncogene homolog	Undirected	STRING
6136	RPL12	ribosomal protein L12	6223	RPS19	ribosomal protein S19	Undirected	IntNetDB
5700	PSMC1	proteasome (prosome, macropain) 26S subunit, ATPase, 1	7316	UBC	ubiquitin C	Undirected	STRING,IntNetDB
6722	SRF	serum response factor (c-fos serum response element-binding transcription factor)	6157	RPL27A	ribosomal protein L27a	TF->gene	TRANSFAC,JASPAR
112398	EGLN2	egl nine homolog 2 (C. elegans)	240	ALOX5	arachidonate 5-lipoxygenase	Undirected	IntNetDB
7111	TMOD1	tropomodulin 1	998	CDC42	cell division cycle 42 (GTP binding protein, 25kDa)	Undirected	IntNetDB
860	RUNX2	runt-related transcription factor 2	115330	GPR146	G protein-coupled receptor 146	TF->gene	TRANSFAC
hsa-miR-142-3p	hsa-miR-142-3p	hsa-miR-142-3p	23598	PATZ1	POZ (BTB) and AT hook containing zinc finger 1	miRNA->gene	PicTar,TargetScan
405	ARNT	aryl hydrocarbon receptor nuclear translocator	3191	HNRNPL	heterogeneous nuclear ribonucleoprotein L	TF->gene	TRANSFAC
6161	RPL32	ribosomal protein L32	6191	RPS4X	ribosomal protein S4, X-linked	Undirected	STRING,IntNetDB
hsa-miR-124	hsa-miR-124	hsa-miR-124	6655	SOS2	son of sevenless homolog 2 (Drosophila)	miRNA->gene	TargetScan
6670	SP3	Sp3 transcription factor	3727	JUND	jun D proto-oncogene	TF->gene	TRANSFAC
6722	SRF	serum response factor (c-fos serum response element-binding transcription factor)	7171	TPM4	tropomyosin 4	TF->gene	TRANSFAC,JASPAR
hsa-miR-424	hsa-miR-424	hsa-miR-424	114805	GALNT13	UDP-N-acetyl-alpha-D-galactosamine:polypeptide N-acetylgalactosaminyltransferase 13 (GalNAc-T13)	miRNA->gene	TargetScan
6929	TCF3	transcription factor 3 (E2A immunoglobulin enhancer binding factors E12/E47)	126432	FLJ45909	Ras and Rab interactor-like	TF->gene	TRANSFAC
1933	EEF1B2	eukaryotic translation elongation factor 1 beta 2	9045	RPL14	ribosomal protein L14	Undirected	IntNetDB
6720	SREBF1	sterol regulatory element binding transcription factor 1	57705	WDFY4	WDFY family member 4	TF->gene	TRANSFAC
2353	FOS	v-fos FBJ murine osteosarcoma viral oncogene homolog	3356	HTR2A	5-hydroxytryptamine (serotonin) receptor 2A	Undirected	STRING
2771	GNAI2	guanine nucleotide binding protein (G protein), alpha inhibiting activity polypeptide 2	108	ADCY2	adenylate cyclase 2 (brain)	KEGG directed	KEGG
6670	SP3	Sp3 transcription factor	85359	DGCR6L	DiGeorge syndrome critical region gene 6-like	TF->gene	TRANSFAC
hsa-miR-454	hsa-miR-454	hsa-miR-454	2069	EREG	epiregulin	miRNA->gene	TargetScan
4807	NHLH1	nescient helix loop helix 1	85359	DGCR6L	DiGeorge syndrome critical region gene 6-like	TF->gene	TRANSFAC
5045	FURIN	furin (paired basic amino acid cleaving enzyme)	79148	MMP28	matrix metallopeptidase 28	Undirected	STRING
6722	SRF	serum response factor (c-fos serum response element-binding transcription factor)	8531	CSDA	cold shock domain protein A	TF->gene	TRANSFAC
7157	TP53	tumor protein p53	5610	EIF2AK2	eukaryotic translation initiation factor 2-alpha kinase 2	Undirected	STRING
7001	PRDX2	peroxiredoxin 2	7504	XK	X-linked Kx blood group (McLeod syndrome)	Undirected	IntNetDB
2597	GAPDH	glyceraldehyde-3-phosphate dehydrogenase	5111	PCNA	proliferating cell nuclear antigen	Undirected	STRING
6929	TCF3	transcription factor 3 (E2A immunoglobulin enhancer binding factors E12/E47)	317781	DDX51	DEAD (Asp-Glu-Ala-Asp) box polypeptide 51	TF->gene	TRANSFAC
10681	GNB5	guanine nucleotide binding protein (G protein), beta 5	2781	GNAZ	guanine nucleotide binding protein (G protein), alpha z polypeptide	Undirected	IntNetDB
6169	RPL38	ribosomal protein L38	6157	RPL27A	ribosomal protein L27a	Undirected	STRING,IntNetDB
2321	FLT1	fms-related tyrosine kinase 1 (vascular endothelial growth factor/vascular permeability factor receptor)	5336	PLCG2	phospholipase C, gamma 2 (phosphatidylinositol-specific)	Undirected	STRING
1088	CEACAM8	carcinoembryonic antigen-related cell adhesion molecule 8	3684	ITGAM	integrin, alpha M (complement component 3 receptor 3 subunit)	Undirected	STRING
6141	RPL18	ribosomal protein L18	6208	RPS14	ribosomal protein S14	Undirected	STRING,IntNetDB
6141	RPL18	ribosomal protein L18	6203	RPS9	ribosomal protein S9	Undirected	STRING,IntNetDB
3172	HNF4A	hepatocyte nuclear factor 4, alpha	113402	SFT2D1	SFT2 domain containing 1	TF->gene	TRANSFAC
2919	CXCL1	chemokine (C-X-C motif) ligand 1 (melanoma growth stimulating activity, alpha)	3579	IL8RB	interleukin 8 receptor, beta	Undirected	KEGG,STRING
150372	NFAM1	NFAT activating protein with ITAM motif 1	2319	FLOT2	flotillin 2	Undirected	IntNetDB
1933	EEF1B2	eukaryotic translation elongation factor 1 beta 2	6189	RPS3A	ribosomal protein S3A	Undirected	IntNetDB
2908	NR3C1	nuclear receptor subfamily 3, group C, member 1 (glucocorticoid receptor)	55830	GLT8D1	glycosyltransferase 8 domain containing 1	TF->gene	TRANSFAC
1511	CTSG	cathepsin G	4318	MMP9	matrix metallopeptidase 9 (gelatinase B, 92kDa gelatinase, 92kDa type IV collagenase)	Undirected	STRING,IntNetDB
2623	GATA1	GATA binding protein 1 (globin transcription factor 1)	1043	CD52	CD52 molecule	TF->gene	TRANSFAC
2597	GAPDH	glyceraldehyde-3-phosphate dehydrogenase	60	ACTB	actin, beta	Undirected	STRING
3172	HNF4A	hepatocyte nuclear factor 4, alpha	439996	IFIT1L	interferon-induced protein with tetratricopeptide repeats 1-like	TF->gene	TRANSFAC
5591	PRKDC	protein kinase, DNA-activated, catalytic polypeptide	7157	TP53	tumor protein p53	KEGG directed	KEGG,STRING,IntNetDB
5473	PPBP	pro-platelet basic protein (chemokine (C-X-C motif) ligand 7)	5724	PTAFR	platelet-activating factor receptor	Undirected	IntNetDB
hsa-miR-130a	hsa-miR-130a	hsa-miR-130a	2319	FLOT2	flotillin 2	miRNA->gene	PicTar
4354	MPP1	membrane protein, palmitoylated 1, 55kDa	665	BNIP3L	BCL2/adenovirus E1B 19kDa interacting protein 3-like	Undirected	IntNetDB
6203	RPS9	ribosomal protein S9	6137	RPL13	ribosomal protein L13	Undirected	STRING,IntNetDB
7392	USF2	upstream transcription factor 2, c-fos interacting	51024	FIS1	fission 1 (mitochondrial outer membrane) homolog (S. cerevisiae)	TF->gene	TRANSFAC
hsa-miR-301a	hsa-miR-301a	hsa-miR-301a	858	CAV2	caveolin 2	miRNA->gene	TargetScan
6722	SRF	serum response factor (c-fos serum response element-binding transcription factor)	7030	TFE3	transcription factor binding to IGHM enhancer 3	Undirected	IntNetDB
3172	HNF4A	hepatocyte nuclear factor 4, alpha	23604	DAPK2	death-associated protein kinase 2	TF->gene	TRANSFAC
4354	MPP1	membrane protein, palmitoylated 1, 55kDa	6521	SLC4A1	solute carrier family 4, anion exchanger, member 1 (erythrocyte membrane protein band 3, Diego blood group)	Undirected	IntNetDB
1385	CREB1	cAMP responsive element binding protein 1	7178	TPT1	tumor protein, translationally-controlled 1	Undirected	STRING
6668	SP2	Sp2 transcription factor	143686	SESN3	sestrin 3	TF->gene	TRANSFAC
6205	RPS11	ribosomal protein S11	6189	RPS3A	ribosomal protein S3A	Undirected	STRING,IntNetDB
hsa-miR-376c	hsa-miR-376c	hsa-miR-376c	2180	ACSL1	acyl-CoA synthetase long-chain family member 1	miRNA->gene	TargetScan
6668	SP2	Sp2 transcription factor	6929	TCF3	transcription factor 3 (E2A immunoglobulin enhancer binding factors E12/E47)	TF->gene	TRANSFAC
84159	ARID5B	AT rich interactive domain 5B (MRF1-like)	2039	EPB49	erythrocyte membrane protein band 4.9 (dematin)	TF->gene	TRANSFAC
212	ALAS2	aminolevulinate, delta-, synthase 2	2996	GYPE	glycophorin E	Undirected	IntNetDB
212	ALAS2	aminolevulinate, delta-, synthase 2	2995	GYPC	glycophorin C (Gerbich blood group)	Undirected	IntNetDB
hsa-miR-301a	hsa-miR-301a	hsa-miR-301a	9334	B4GALT5	UDP-Gal:betaGlcNAc beta 1,4- galactosyltransferase, polypeptide 5	miRNA->gene	TargetScan
6670	SP3	Sp3 transcription factor	6929	TCF3	transcription factor 3 (E2A immunoglobulin enhancer binding factors E12/E47)	TF->gene	TRANSFAC
6169	RPL38	ribosomal protein L38	6124	RPL4	ribosomal protein L4	Undirected	STRING,IntNetDB
hsa-miR-410	hsa-miR-410	hsa-miR-410	7145	TNS1	tensin 1	miRNA->gene	TargetScan
3039	HBA1	hemoglobin, alpha 1	3045	HBD	hemoglobin, delta	Undirected	IntNetDB
6169	RPL38	ribosomal protein L38	6125	RPL5	ribosomal protein L5	Undirected	STRING,IntNetDB
3039	HBA1	hemoglobin, alpha 1	3043	HBB	hemoglobin, beta	Undirected	IntNetDB
2038	EPB42	erythrocyte membrane protein band 4.2	5498	PPOX	protoporphyrinogen oxidase	Undirected	IntNetDB
hsa-miR-410	hsa-miR-410	hsa-miR-410	8496	PPFIBP1	PTPRF interacting protein, binding protein 1 (liprin beta 1)	miRNA->gene	TargetScan
6133	RPL9	ribosomal protein L9	6143	RPL19	ribosomal protein L19	Undirected	IntNetDB
4780	NFE2L2	nuclear factor (erythroid-derived 2)-like 2	64581	CLEC7A	C-type lectin domain family 7, member A	TF->gene	TRANSFAC
3039	HBA1	hemoglobin, alpha 1	3048	HBG2	hemoglobin, gamma G	Undirected	IntNetDB
6777	STAT5B	signal transducer and activator of transcription 5B	286826	LIN9	lin-9 homolog (C. elegans)	TF->gene	TRANSFAC
23598	PATZ1	POZ (BTB) and AT hook containing zinc finger 1	10077	TSPAN32	tetraspanin 32	TF->gene	TRANSFAC
6670	SP3	Sp3 transcription factor	441951	C20orf199	chromosome 20 open reading frame 199	TF->gene	TRANSFAC
6670	SP3	Sp3 transcription factor	9704	DHX34	DEAH (Asp-Glu-Ala-His) box polypeptide 34	TF->gene	TRANSFAC
6670	SP3	Sp3 transcription factor	25798	BRI3	brain protein I3	TF->gene	TRANSFAC
hsa-miR-320d	hsa-miR-320d	hsa-miR-320d	6535	SLC6A8	solute carrier family 6 (neurotransmitter transporter, creatine), member 8	miRNA->gene	TargetScan
6929	TCF3	transcription factor 3 (E2A immunoglobulin enhancer binding factors E12/E47)	23625	FAM89B	family with sequence similarity 89, member B	TF->gene	TRANSFAC,JASPAR
6668	SP2	Sp2 transcription factor	22898	DENND3	DENN/MADD domain containing 3	TF->gene	TRANSFAC
6143	RPL19	ribosomal protein L19	6168	RPL37A	ribosomal protein L37a	Undirected	STRING,IntNetDB
6143	RPL19	ribosomal protein L19	6169	RPL38	ribosomal protein L38	Undirected	STRING,IntNetDB
6203	RPS9	ribosomal protein S9	64981	MRPL34	mitochondrial ribosomal protein L34	Undirected	IntNetDB
2781	GNAZ	guanine nucleotide binding protein (G protein), alpha z polypeptide	998	CDC42	cell division cycle 42 (GTP binding protein, 25kDa)	Undirected	IntNetDB
6143	RPL19	ribosomal protein L19	6160	RPL31	ribosomal protein L31	Undirected	STRING,IntNetDB
6143	RPL19	ribosomal protein L19	6161	RPL32	ribosomal protein L32	Undirected	STRING,IntNetDB
6143	RPL19	ribosomal protein L19	6166	RPL36AL	ribosomal protein L36a-like	Undirected	IntNetDB
hsa-miR-33b	hsa-miR-33b	hsa-miR-33b	23097	CDC2L6	cell division cycle 2-like 6 (CDK8-like)	miRNA->gene	TargetScan
6191	RPS4X	ribosomal protein S4, X-linked	90121	TSR2	TSR2, 20S rRNA accumulation, homolog (S. cerevisiae)	Undirected	IntNetDB
10661	KLF1	Kruppel-like factor 1 (erythroid)	5498	PPOX	protoporphyrinogen oxidase	Undirected	IntNetDB
997	CDC34	cell division cycle 34 homolog (S. cerevisiae)	7314	UBB	ubiquitin B	Undirected	STRING
966	CD59	CD59 molecule, complement regulatory protein	728	C5AR1	complement component 5a receptor 1	Undirected	STRING
3045	HBD	hemoglobin, delta	645	BLVRB	biliverdin reductase B (flavin reductase (NADPH))	Undirected	IntNetDB
6670	SP3	Sp3 transcription factor	83636	C19orf12	chromosome 19 open reading frame 12	TF->gene	TRANSFAC
6667	SP1	Sp1 transcription factor	6484	ST3GAL4	ST3 beta-galactoside alpha-2,3-sialyltransferase 4	TF->gene	TRANSFAC
hsa-miR-320d	hsa-miR-320d	hsa-miR-320d	23177	CEP68	centrosomal protein 68kDa	miRNA->gene	TargetScan
6670	SP3	Sp3 transcription factor	9645	MICAL2	microtubule associated monoxygenase, calponin and LIM domain containing 2	TF->gene	TRANSFAC
6670	SP3	Sp3 transcription factor	9647	PPM1F	protein phosphatase 1F (PP2C domain containing)	TF->gene	TRANSFAC
6141	RPL18	ribosomal protein L18	6155	RPL27	ribosomal protein L27	Undirected	STRING,IntNetDB
6141	RPL18	ribosomal protein L18	6157	RPL27A	ribosomal protein L27a	Undirected	STRING,IntNetDB
27236	ARFIP1	ADP-ribosylation factor interacting protein 1	7555	CNBP	CCHC-type zinc finger, nucleic acid binding protein	Undirected	IntNetDB
192134	B3GNT6	UDP-GlcNAc:betaGal beta-1,3-N-acetylglucosaminyltransferase 6 (core 3 synthase)	114805	GALNT13	UDP-N-acetyl-alpha-D-galactosamine:polypeptide N-acetylgalactosaminyltransferase 13 (GalNAc-T13)	KEGG directed	KEGG
1998	ELF2	E74-like factor 2 (ets domain transcription factor)	3039	HBA1	hemoglobin, alpha 1	TF->gene	TRANSFAC
212	ALAS2	aminolevulinate, delta-, synthase 2	4354	MPP1	membrane protein, palmitoylated 1, 55kDa	Undirected	IntNetDB
hsa-miR-320c	hsa-miR-320c	hsa-miR-320c	6256	RXRA	retinoid X receptor, alpha	miRNA->gene	TargetScan
6125	RPL5	ribosomal protein L5	6136	RPL12	ribosomal protein L12	Undirected	IntNetDB
2358	FPRL1	formyl peptide receptor 2	3579	IL8RB	interleukin 8 receptor, beta	Undirected	IntNetDB
6125	RPL5	ribosomal protein L5	6133	RPL9	ribosomal protein L9	Undirected	IntNetDB
6124	RPL4	ribosomal protein L4	6176	RPLP1	ribosomal protein, large, P1	Undirected	STRING,IntNetDB
6653	SORL1	sortilin-related receptor, L(DLR class) A repeats-containing	6720	SREBF1	sterol regulatory element binding transcription factor 1	Undirected	IntNetDB
11224	RPL35	ribosomal protein L35	9045	RPL14	ribosomal protein L14	Undirected	STRING,IntNetDB
6670	SP3	Sp3 transcription factor	51547	SIRT7	sirtuin (silent mating type information regulation 2 homolog) 7 (S. cerevisiae)	TF->gene	TRANSFAC
5591	PRKDC	protein kinase, DNA-activated, catalytic polypeptide	309	ANXA6	annexin A6	Undirected	STRING
2908	NR3C1	nuclear receptor subfamily 3, group C, member 1 (glucocorticoid receptor)	7157	TP53	tumor protein p53	Undirected	STRING
6668	SP2	Sp2 transcription factor	4780	NFE2L2	nuclear factor (erythroid-derived 2)-like 2	TF->gene	TRANSFAC
3579	IL8RB	interleukin 8 receptor, beta	728	C5AR1	complement component 5a receptor 1	Undirected	IntNetDB
1051	CEBPB	CCAAT/enhancer binding protein (C/EBP), beta	143686	SESN3	sestrin 3	TF->gene	TRANSFAC
6205	RPS11	ribosomal protein S11	6157	RPL27A	ribosomal protein L27a	Undirected	STRING,IntNetDB
6154	RPL26	ribosomal protein L26	6157	RPL27A	ribosomal protein L27a	Undirected	IntNetDB
3684	ITGAM	integrin, alpha M (complement component 3 receptor 3 subunit)	6667	SP1	Sp1 transcription factor	Undirected	STRING
hsa-miR-320b	hsa-miR-320b	hsa-miR-320b	2908	NR3C1	nuclear receptor subfamily 3, group C, member 1 (glucocorticoid receptor)	miRNA->gene	TargetScan
23598	PATZ1	POZ (BTB) and AT hook containing zinc finger 1	9587	MAD2L1BP	MAD2L1 binding protein	TF->gene	TRANSFAC
4666	NACA	nascent polypeptide-associated complex alpha subunit	6189	RPS3A	ribosomal protein S3A	Undirected	IntNetDB
6929	TCF3	transcription factor 3 (E2A immunoglobulin enhancer binding factors E12/E47)	5610	EIF2AK2	eukaryotic translation initiation factor 2-alpha kinase 2	TF->gene	TRANSFAC
hsa-miR-320d	hsa-miR-320d	hsa-miR-320d	677	ZFP36L1	zinc finger protein 36, C3H type-like 1	miRNA->gene	TargetScan
5460	POU5F1	POU class 5 homeobox 1	2649	NR6A1	nuclear receptor subfamily 6, group A, member 1	Undirected	STRING
9045	RPL14	ribosomal protein L14	6125	RPL5	ribosomal protein L5	Undirected	STRING,IntNetDB
6154	RPL26	ribosomal protein L26	6208	RPS14	ribosomal protein S14	Undirected	IntNetDB
4303	FOXO4	forkhead box O4	10261	IGSF6	immunoglobulin superfamily, member 6	TF->gene	TRANSFAC
1544	CYP1A2	cytochrome P450, family 1, subfamily A, polypeptide 2	66002	CYP4F12	cytochrome P450, family 4, subfamily F, polypeptide 12	Undirected	IntNetDB
6668	SP2	Sp2 transcription factor	57533	TBC1D14	TBC1 domain family, member 14	TF->gene	TRANSFAC
200315	APOBEC3A	apolipoprotein B mRNA editing enzyme, catalytic polypeptide-like 3A	728	C5AR1	complement component 5a receptor 1	Undirected	IntNetDB
212	ALAS2	aminolevulinate, delta-, synthase 2	7027	TFDP1	transcription factor Dp-1	Undirected	IntNetDB
212	ALAS2	aminolevulinate, delta-, synthase 2	25893	TRIM58	tripartite motif-containing 58	Undirected	IntNetDB
405	ARNT	aryl hydrocarbon receptor nuclear translocator	6279	S100A8	S100 calcium binding protein A8	TF->gene	TRANSFAC
hsa-miR-223	hsa-miR-223	hsa-miR-223	54855	FAM46C	family with sequence similarity 46, member C	miRNA->gene	TargetScan
1998	ELF2	E74-like factor 2 (ets domain transcription factor)	6888	TALDO1	transaldolase 1	TF->gene	TRANSFAC
2597	GAPDH	glyceraldehyde-3-phosphate dehydrogenase	6622	SNCA	synuclein, alpha (non A4 component of amyloid precursor)	Undirected	STRING
10661	KLF1	Kruppel-like factor 1 (erythroid)	8991	SELENBP1	selenium binding protein 1	Undirected	IntNetDB
6929	TCF3	transcription factor 3 (E2A immunoglobulin enhancer binding factors E12/E47)	7320	UBE2B	ubiquitin-conjugating enzyme E2B (RAD6 homolog)	TF->gene	TRANSFAC
405	ARNT	aryl hydrocarbon receptor nuclear translocator	136991	ASZ1	ankyrin repeat, SAM and basic leucine zipper domain containing 1	TF->gene	TRANSFAC
405	ARNT	aryl hydrocarbon receptor nuclear translocator	665	BNIP3L	BCL2/adenovirus E1B 19kDa interacting protein 3-like	TF->gene	TRANSFAC
5498	PPOX	protoporphyrinogen oxidase	7027	TFDP1	transcription factor Dp-1	Undirected	IntNetDB
2294	FOXF1	forkhead box F1	8843	GPR109B	G protein-coupled receptor 109B	TF->gene	TRANSFAC
10661	KLF1	Kruppel-like factor 1 (erythroid)	6521	SLC4A1	solute carrier family 4, anion exchanger, member 1 (erythrocyte membrane protein band 3, Diego blood group)	Undirected	IntNetDB
6722	SRF	serum response factor (c-fos serum response element-binding transcription factor)	24140	FTSJ1	FtsJ homolog 1 (E. coli)	TF->gene	TRANSFAC
hsa-miR-340	hsa-miR-340	hsa-miR-340	157	ADRBK2	adrenergic, beta, receptor kinase 2	miRNA->gene	TargetScan
6722	SRF	serum response factor (c-fos serum response element-binding transcription factor)	91663	MYADM	myeloid-associated differentiation marker	TF->gene	TRANSFAC,JASPAR
1050	CEBPA	CCAAT/enhancer binding protein (C/EBP), alpha	143686	SESN3	sestrin 3	TF->gene	TRANSFAC
3727	JUND	jun D proto-oncogene	3002	GZMB	granzyme B (granzyme 2, cytotoxic T-lymphocyte-associated serine esterase 1)	TF->gene	TRANSFAC
6667	SP1	Sp1 transcription factor	79143	MBOAT7	membrane bound O-acyltransferase domain containing 7	TF->gene	TRANSFAC
3482	IGF2R	insulin-like growth factor 2 receptor	3002	GZMB	granzyme B (granzyme 2, cytotoxic T-lymphocyte-associated serine esterase 1)	Undirected	STRING
7392	USF2	upstream transcription factor 2, c-fos interacting	57646	USP28	ubiquitin specific peptidase 28	TF->gene	TRANSFAC
4303	FOXO4	forkhead box O4	4815	NINJ2	ninjurin 2	TF->gene	TRANSFAC
2996	GYPE	glycophorin E	6521	SLC4A1	solute carrier family 4, anion exchanger, member 1 (erythrocyte membrane protein band 3, Diego blood group)	Undirected	IntNetDB
6169	RPL38	ribosomal protein L38	9045	RPL14	ribosomal protein L14	Undirected	STRING,IntNetDB
10661	KLF1	Kruppel-like factor 1 (erythroid)	51218	GLRX5	glutaredoxin 5	Undirected	IntNetDB
6208	RPS14	ribosomal protein S14	6189	RPS3A	ribosomal protein S3A	Undirected	STRING,IntNetDB
1998	ELF2	E74-like factor 2 (ets domain transcription factor)	2219	FCN1	ficolin (collagen/fibrinogen domain containing) 1	TF->gene	TRANSFAC
6667	SP1	Sp1 transcription factor	203228	C9orf72	chromosome 9 open reading frame 72	TF->gene	TRANSFAC
5145	PDE6A	phosphodiesterase 6A, cGMP-specific, rod, alpha	353	APRT	adenine phosphoribosyltransferase	KEGG directed	KEGG
6667	SP1	Sp1 transcription factor	51024	FIS1	fission 1 (mitochondrial outer membrane) homolog (S. cerevisiae)	TF->gene	TRANSFAC
26145	IRF2BP1	interferon regulatory factor 2 binding protein 1	2649	NR6A1	nuclear receptor subfamily 6, group A, member 1	Undirected	IntNetDB
hsa-miR-142-3p	hsa-miR-142-3p	hsa-miR-142-3p	84159	ARID5B	AT rich interactive domain 5B (MRF1-like)	miRNA->gene	TargetScan
405	ARNT	aryl hydrocarbon receptor nuclear translocator	83999	KREMEN1	kringle containing transmembrane protein 1	TF->gene	TRANSFAC
10261	IGSF6	immunoglobulin superfamily, member 6	3820	KLRB1	killer cell lectin-like receptor subfamily B, member 1	Undirected	IntNetDB
3002	GZMB	granzyme B (granzyme 2, cytotoxic T-lymphocyte-associated serine esterase 1)	637	BID	BH3 interacting domain death agonist	KEGG directed	KEGG,STRING
hsa-miR-454	hsa-miR-454	hsa-miR-454	19	ABCA1	ATP-binding cassette, sub-family A (ABC1), member 1	miRNA->gene	TargetScan
6670	SP3	Sp3 transcription factor	23559	WBP1	WW domain binding protein 1	TF->gene	TRANSFAC
51218	GLRX5	glutaredoxin 5	51327	ERAF	erythroid associated factor	Undirected	IntNetDB
hsa-miR-124	hsa-miR-124	hsa-miR-124	219931	TPCN2	two pore segment channel 2	miRNA->gene	TargetScan
hsa-miR-340	hsa-miR-340	hsa-miR-340	4603	MYBL1	v-myb myeloblastosis viral oncogene homolog (avian)-like 1	miRNA->gene	TargetScan
292	SLC25A5	solute carrier family 25 (mitochondrial carrier; adenine nucleotide translocator), member 5	5591	PRKDC	protein kinase, DNA-activated, catalytic polypeptide	Undirected	IntNetDB
10661	KLF1	Kruppel-like factor 1 (erythroid)	51327	ERAF	erythroid associated factor	Undirected	STRING,IntNetDB
hsa-miR-424	hsa-miR-424	hsa-miR-424	55629	PNRC2	proline-rich nuclear receptor coactivator 2	miRNA->gene	TargetScan
4780	NFE2L2	nuclear factor (erythroid-derived 2)-like 2	201229	LOC201229	hypothetical protein LOC201229	TF->gene	TRANSFAC
hsa-miR-124	hsa-miR-124	hsa-miR-124	5045	FURIN	furin (paired basic amino acid cleaving enzyme)	miRNA->gene	TargetScan
2038	EPB42	erythrocyte membrane protein band 4.2	7027	TFDP1	transcription factor Dp-1	Undirected	IntNetDB
1998	ELF2	E74-like factor 2 (ets domain transcription factor)	317781	DDX51	DEAD (Asp-Glu-Ala-Asp) box polypeptide 51	TF->gene	TRANSFAC
hsa-miR-340	hsa-miR-340	hsa-miR-340	2180	ACSL1	acyl-CoA synthetase long-chain family member 1	miRNA->gene	TargetScan
2114	ETS2	v-ets erythroblastosis virus E26 oncogene homolog 2 (avian)	820	CAMP	cathelicidin antimicrobial peptide	TF->gene	TRANSFAC
6141	RPL18	ribosomal protein L18	11224	RPL35	ribosomal protein L35	Undirected	STRING,IntNetDB
6169	RPL38	ribosomal protein L38	6189	RPS3A	ribosomal protein S3A	Undirected	STRING,IntNetDB
3727	JUND	jun D proto-oncogene	3958	LGALS3	lectin, galactoside-binding, soluble, 3	TF->gene	TRANSFAC
6668	SP2	Sp2 transcription factor	9647	PPM1F	protein phosphatase 1F (PP2C domain containing)	TF->gene	TRANSFAC
6668	SP2	Sp2 transcription factor	9645	MICAL2	microtubule associated monoxygenase, calponin and LIM domain containing 2	TF->gene	TRANSFAC
6670	SP3	Sp3 transcription factor	8460	TPST1	tyrosylprotein sulfotransferase 1	TF->gene	TRANSFAC
hsa-miR-33b	hsa-miR-33b	hsa-miR-33b	54855	FAM46C	family with sequence similarity 46, member C	miRNA->gene	TargetScan
820	CAMP	cathelicidin antimicrobial peptide	2358	FPRL1	formyl peptide receptor 2	Undirected	STRING
6203	RPS9	ribosomal protein S9	6125	RPL5	ribosomal protein L5	Undirected	STRING,IntNetDB
6203	RPS9	ribosomal protein S9	6124	RPL4	ribosomal protein L4	Undirected	STRING,IntNetDB
1998	ELF2	E74-like factor 2 (ets domain transcription factor)	143666	LOC143666	hypothetical protein LOC143666	TF->gene	TRANSFAC
7431	VIM	vimentin	7157	TP53	tumor protein p53	Undirected	STRING
10661	KLF1	Kruppel-like factor 1 (erythroid)	3045	HBD	hemoglobin, delta	Undirected	IntNetDB
3684	ITGAM	integrin, alpha M (complement component 3 receptor 3 subunit)	966	CD59	CD59 molecule, complement regulatory protein	Undirected	STRING
1385	CREB1	cAMP responsive element binding protein 1	6141	RPL18	ribosomal protein L18	TF->gene	TRANSFAC,JASPAR
hsa-miR-320b	hsa-miR-320b	hsa-miR-320b	7431	VIM	vimentin	miRNA->gene	TargetScan
6722	SRF	serum response factor (c-fos serum response element-binding transcription factor)	2819	GPD1	glycerol-3-phosphate dehydrogenase 1 (soluble)	TF->gene	TRANSFAC
5473	PPBP	pro-platelet basic protein (chemokine (C-X-C motif) ligand 7)	6374	CXCL5	chemokine (C-X-C motif) ligand 5	Undirected	IntNetDB
hsa-miR-340	hsa-miR-340	hsa-miR-340	7111	TMOD1	tropomodulin 1	miRNA->gene	TargetScan
11224	RPL35	ribosomal protein L35	6203	RPS9	ribosomal protein S9	Undirected	STRING,IntNetDB
4354	MPP1	membrane protein, palmitoylated 1, 55kDa	6535	SLC6A8	solute carrier family 6 (neurotransmitter transporter, creatine), member 8	Undirected	IntNetDB
3002	GZMB	granzyme B (granzyme 2, cytotoxic T-lymphocyte-associated serine esterase 1)	837	CASP4	caspase 4, apoptosis-related cysteine peptidase	Undirected	IntNetDB
6670	SP3	Sp3 transcription factor	57646	USP28	ubiquitin specific peptidase 28	TF->gene	TRANSFAC
6720	SREBF1	sterol regulatory element binding transcription factor 1	55748	CNDP2	CNDP dipeptidase 2 (metallopeptidase M20 family)	TF->gene	TRANSFAC
6256	RXRA	retinoid X receptor, alpha	19	ABCA1	ATP-binding cassette, sub-family A (ABC1), member 1	Undirected	STRING
2872	MKNK2	MAP kinase interacting serine/threonine kinase 2	353	APRT	adenine phosphoribosyltransferase	Undirected	IntNetDB
6929	TCF3	transcription factor 3 (E2A immunoglobulin enhancer binding factors E12/E47)	51545	ZNF581	zinc finger protein 581	TF->gene	TRANSFAC
2908	NR3C1	nuclear receptor subfamily 3, group C, member 1 (glucocorticoid receptor)	3652	IPP	intracisternal A particle-promoted polypeptide	TF->gene	TRANSFAC
hsa-miR-124	hsa-miR-124	hsa-miR-124	23500	DAAM2	dishevelled associated activator of morphogenesis 2	miRNA->gene	TargetScan
571	BACH1	BTB and CNC homology 1, basic leucine zipper transcription factor 1	4318	MMP9	matrix metallopeptidase 9 (gelatinase B, 92kDa gelatinase, 92kDa type IV collagenase)	TF->gene	TRANSFAC
860	RUNX2	runt-related transcription factor 2	2219	FCN1	ficolin (collagen/fibrinogen domain containing) 1	TF->gene	TRANSFAC
405	ARNT	aryl hydrocarbon receptor nuclear translocator	2597	GAPDH	glyceraldehyde-3-phosphate dehydrogenase	TF->gene	JASPAR
11224	RPL35	ribosomal protein L35	6189	RPS3A	ribosomal protein S3A	Undirected	STRING,IntNetDB
11224	RPL35	ribosomal protein L35	6161	RPL32	ribosomal protein L32	Undirected	STRING,IntNetDB
637	BID	BH3 interacting domain death agonist	598	BCL2L1	BCL2-like 1	Undirected	STRING,IntNetDB
1088	CEACAM8	carcinoembryonic antigen-related cell adhesion molecule 8	1669	DEFA4	defensin, alpha 4, corticostatin	Undirected	IntNetDB
7392	USF2	upstream transcription factor 2, c-fos interacting	6143	RPL19	ribosomal protein L19	TF->gene	TRANSFAC
6133	RPL9	ribosomal protein L9	6176	RPLP1	ribosomal protein, large, P1	Undirected	IntNetDB
6722	SRF	serum response factor (c-fos serum response element-binding transcription factor)	7157	TP53	tumor protein p53	Undirected	IntNetDB
64581	CLEC7A	C-type lectin domain family 7, member A	728	C5AR1	complement component 5a receptor 1	Undirected	IntNetDB
1050	CEBPA	CCAAT/enhancer binding protein (C/EBP), alpha	392490	FLJ44635	TPT1-like protein	TF->gene	TRANSFAC
6720	SREBF1	sterol regulatory element binding transcription factor 1	2330	FMO5	flavin containing monooxygenase 5	TF->gene	TRANSFAC
11224	RPL35	ribosomal protein L35	6166	RPL36AL	ribosomal protein L36a-like	Undirected	IntNetDB
6728	SRP19	signal recognition particle 19kDa	9045	RPL14	ribosomal protein L14	Undirected	IntNetDB
1991	ELA2	elastase 2, neutrophil	728	C5AR1	complement component 5a receptor 1	Undirected	STRING
6143	RPL19	ribosomal protein L19	7555	CNBP	CCHC-type zinc finger, nucleic acid binding protein	Undirected	IntNetDB
6670	SP3	Sp3 transcription factor	83605	CCM2	cerebral cavernous malformation 2	TF->gene	TRANSFAC
1050	CEBPA	CCAAT/enhancer binding protein (C/EBP), alpha	100129250	LOC100129250	similar to hCG1811779	TF->gene	TRANSFAC
6155	RPL27	ribosomal protein L27	11224	RPL35	ribosomal protein L35	Undirected	STRING,IntNetDB
1052	CEBPD	CCAAT/enhancer binding protein (C/EBP), delta	10261	IGSF6	immunoglobulin superfamily, member 6	TF->gene	TRANSFAC
3172	HNF4A	hepatocyte nuclear factor 4, alpha	6718	AKR1D1	aldo-keto reductase family 1, member D1 (delta 4-3-ketosteroid-5-beta-reductase)	TF->gene	TRANSFAC
4303	FOXO4	forkhead box O4	7320	UBE2B	ubiquitin-conjugating enzyme E2B (RAD6 homolog)	TF->gene	TRANSFAC
7157	TP53	tumor protein p53	94241	TP53INP1	tumor protein p53 inducible nuclear protein 1	TF->gene	JASPAR
6125	RPL5	ribosomal protein L5	6166	RPL36AL	ribosomal protein L36a-like	Undirected	IntNetDB
6141	RPL18	ribosomal protein L18	6168	RPL37A	ribosomal protein L37a	Undirected	STRING,IntNetDB
6141	RPL18	ribosomal protein L18	6169	RPL38	ribosomal protein L38	Undirected	STRING,IntNetDB
hsa-miR-454	hsa-miR-454	hsa-miR-454	1870	E2F2	E2F transcription factor 2	miRNA->gene	TargetScan
6670	SP3	Sp3 transcription factor	124590	USH1G	Usher syndrome 1G (autosomal recessive)	TF->gene	TRANSFAC
1511	CTSG	cathepsin G	5473	PPBP	pro-platelet basic protein (chemokine (C-X-C motif) ligand 7)	Undirected	STRING
6722	SRF	serum response factor (c-fos serum response element-binding transcription factor)	339175	METTL2A	methyltransferase like 2A	TF->gene	TRANSFAC
6141	RPL18	ribosomal protein L18	6160	RPL31	ribosomal protein L31	Undirected	STRING,IntNetDB
6141	RPL18	ribosomal protein L18	6161	RPL32	ribosomal protein L32	Undirected	STRING,IntNetDB
6667	SP1	Sp1 transcription factor	23186	RCOR1	REST corepressor 1	TF->gene	TRANSFAC
2623	GATA1	GATA binding protein 1 (globin transcription factor 1)	2039	EPB49	erythrocyte membrane protein band 4.9 (dematin)	TF->gene	TRANSFAC
6141	RPL18	ribosomal protein L18	6166	RPL36AL	ribosomal protein L36a-like	Undirected	IntNetDB
2038	EPB42	erythrocyte membrane protein band 4.2	55437	ALS2CR2	amyotrophic lateral sclerosis 2 (juvenile) chromosome region, candidate 2	Undirected	IntNetDB
6176	RPLP1	ribosomal protein, large, P1	6191	RPS4X	ribosomal protein S4, X-linked	Undirected	STRING,IntNetDB
hsa-miR-33b	hsa-miR-33b	hsa-miR-33b	9586	CREB5	cAMP responsive element binding protein 5	miRNA->gene	TargetScan
6668	SP2	Sp2 transcription factor	25798	BRI3	brain protein I3	TF->gene	TRANSFAC
1511	CTSG	cathepsin G	820	CAMP	cathelicidin antimicrobial peptide	Undirected	STRING,IntNetDB
6124	RPL4	ribosomal protein L4	6161	RPL32	ribosomal protein L32	Undirected	STRING,IntNetDB
2781	GNAZ	guanine nucleotide binding protein (G protein), alpha z polypeptide	26279	PLA2G2D	phospholipase A2, group IID	KEGG directed	KEGG,STRING
6124	RPL4	ribosomal protein L4	6166	RPL36AL	ribosomal protein L36a-like	Undirected	IntNetDB
7157	TP53	tumor protein p53	143686	SESN3	sestrin 3	TF->gene	JASPAR
3172	HNF4A	hepatocyte nuclear factor 4, alpha	285755	PPIL6	peptidylprolyl isomerase (cyclophilin)-like 6	TF->gene	TRANSFAC
6136	RPL12	ribosomal protein L12	94241	TP53INP1	tumor protein p53 inducible nuclear protein 1	Undirected	IntNetDB
hsa-miR-340	hsa-miR-340	hsa-miR-340	51	ACOX1	acyl-Coenzyme A oxidase 1, palmitoyl	miRNA->gene	TargetScan
hsa-miR-320c	hsa-miR-320c	hsa-miR-320c	6535	SLC6A8	solute carrier family 6 (neurotransmitter transporter, creatine), member 8	miRNA->gene	TargetScan
1854	DUT	deoxyuridine triphosphatase	28957	MRPS28	mitochondrial ribosomal protein S28	Undirected	IntNetDB
hsa-miR-223	hsa-miR-223	hsa-miR-223	4899	NRF1	nuclear respiratory factor 1	miRNA->gene	PicTar
10261	IGSF6	immunoglobulin superfamily, member 6	8843	GPR109B	G protein-coupled receptor 109B	Undirected	IntNetDB
hsa-miR-32	hsa-miR-32	hsa-miR-32	11343	MGLL	monoglyceride lipase	miRNA->gene	PicTar,TargetScan
51327	ERAF	erythroid associated factor	7001	PRDX2	peroxiredoxin 2	Undirected	IntNetDB
6667	SP1	Sp1 transcription factor	100129250	LOC100129250	similar to hCG1811779	TF->gene	TRANSFAC
1385	CREB1	cAMP responsive element binding protein 1	317781	DDX51	DEAD (Asp-Glu-Ala-Asp) box polypeptide 51	TF->gene	TRANSFAC,JASPAR
1998	ELF2	E74-like factor 2 (ets domain transcription factor)	837	CASP4	caspase 4, apoptosis-related cysteine peptidase	TF->gene	TRANSFAC
10578	GNLY	granulysin	820	CAMP	cathelicidin antimicrobial peptide	Undirected	IntNetDB
6133	RPL9	ribosomal protein L9	6191	RPS4X	ribosomal protein S4, X-linked	Undirected	IntNetDB
4666	NACA	nascent polypeptide-associated complex alpha subunit	6191	RPS4X	ribosomal protein S4, X-linked	Undirected	IntNetDB
hsa-miR-19b	hsa-miR-19b	hsa-miR-19b	2180	ACSL1	acyl-CoA synthetase long-chain family member 1	miRNA->gene	TargetScan
2114	ETS2	v-ets erythroblastosis virus E26 oncogene homolog 2 (avian)	282809	WDR51B	WD repeat domain 51B	TF->gene	TRANSFAC
1050	CEBPA	CCAAT/enhancer binding protein (C/EBP), alpha	29937	NENF	neuron derived neurotrophic factor	TF->gene	TRANSFAC
6929	TCF3	transcription factor 3 (E2A immunoglobulin enhancer binding factors E12/E47)	5591	PRKDC	protein kinase, DNA-activated, catalytic polypeptide	TF->gene	JASPAR
3579	IL8RB	interleukin 8 receptor, beta	8875	VNN2	vanin 2	Undirected	IntNetDB
hsa-miR-124	hsa-miR-124	hsa-miR-124	6929	TCF3	transcription factor 3 (E2A immunoglobulin enhancer binding factors E12/E47)	miRNA->gene	TargetScan
665	BNIP3L	BCL2/adenovirus E1B 19kDa interacting protein 3-like	7027	TFDP1	transcription factor Dp-1	Undirected	IntNetDB
55437	ALS2CR2	amyotrophic lateral sclerosis 2 (juvenile) chromosome region, candidate 2	7178	TPT1	tumor protein, translationally-controlled 1	Undirected	IntNetDB
1054	CEBPG	CCAAT/enhancer binding protein (C/EBP), gamma	hsa-miR-340	hsa-miR-340	hsa-miR-340	TF->miRNA	TRANSFAC
6667	SP1	Sp1 transcription factor	6102	RP2	retinitis pigmentosa 2 (X-linked recessive)	TF->gene	TRANSFAC
6668	SP2	Sp2 transcription factor	51024	FIS1	fission 1 (mitochondrial outer membrane) homolog (S. cerevisiae)	TF->gene	TRANSFAC
6133	RPL9	ribosomal protein L9	6223	RPS19	ribosomal protein S19	Undirected	IntNetDB
2996	GYPE	glycophorin E	645	BLVRB	biliverdin reductase B (flavin reductase (NADPH))	Undirected	IntNetDB
6929	TCF3	transcription factor 3 (E2A immunoglobulin enhancer binding factors E12/E47)	85359	DGCR6L	DiGeorge syndrome critical region gene 6-like	TF->gene	TRANSFAC
6136	RPL12	ribosomal protein L12	6205	RPS11	ribosomal protein S11	Undirected	IntNetDB
6136	RPL12	ribosomal protein L12	6203	RPS9	ribosomal protein S9	Undirected	IntNetDB
25793	FBXO7	F-box protein 7	25893	TRIM58	tripartite motif-containing 58	Undirected	IntNetDB
7316	UBC	ubiquitin C	11065	UBE2C	ubiquitin-conjugating enzyme E2C	Undirected	STRING
2908	NR3C1	nuclear receptor subfamily 3, group C, member 1 (glucocorticoid receptor)	340547	VSIG1	V-set and immunoglobulin domain containing 1	TF->gene	TRANSFAC
6218	RPS17	ribosomal protein S17	6728	SRP19	signal recognition particle 19kDa	Undirected	IntNetDB
2330	FMO5	flavin containing monooxygenase 5	4051	CYP4F3	cytochrome P450, family 4, subfamily F, polypeptide 3	Undirected	IntNetDB
4899	NRF1	nuclear respiratory factor 1	3191	HNRNPL	heterogeneous nuclear ribonucleoprotein L	TF->gene	TRANSFAC
7157	TP53	tumor protein p53	80776	B9D2	B9 protein domain 2	TF->gene	TRANSFAC
6929	TCF3	transcription factor 3 (E2A immunoglobulin enhancer binding factors E12/E47)	2623	GATA1	GATA binding protein 1 (globin transcription factor 1)	Undirected	STRING
2321	FLT1	fms-related tyrosine kinase 1 (vascular endothelial growth factor/vascular permeability factor receptor)	4318	MMP9	matrix metallopeptidase 9 (gelatinase B, 92kDa gelatinase, 92kDa type IV collagenase)	Undirected	STRING
4666	NACA	nascent polypeptide-associated complex alpha subunit	6203	RPS9	ribosomal protein S9	Undirected	IntNetDB
6667	SP1	Sp1 transcription factor	3759	KCNJ2	potassium inwardly-rectifying channel, subfamily J, member 2	TF->gene	TRANSFAC
1998	ELF2	E74-like factor 2 (ets domain transcription factor)	83442	SH3BGRL3	SH3 domain binding glutamic acid-rich protein like 3	TF->gene	TRANSFAC
1511	CTSG	cathepsin G	1991	ELA2	elastase 2, neutrophil	Undirected	IntNetDB
6256	RXRA	retinoid X receptor, alpha	2819	GPD1	glycerol-3-phosphate dehydrogenase 1 (soluble)	TF->gene	TRANSFAC
6667	SP1	Sp1 transcription factor	6929	TCF3	transcription factor 3 (E2A immunoglobulin enhancer binding factors E12/E47)	TF->gene	TRANSFAC
4780	NFE2L2	nuclear factor (erythroid-derived 2)-like 2	5111	PCNA	proliferating cell nuclear antigen	TF->gene	TRANSFAC
2996	GYPE	glycophorin E	6535	SLC6A8	solute carrier family 6 (neurotransmitter transporter, creatine), member 8	Undirected	IntNetDB
23762	OSBP2	oxysterol binding protein 2	2996	GYPE	glycophorin E	Undirected	IntNetDB
6929	TCF3	transcription factor 3 (E2A immunoglobulin enhancer binding factors E12/E47)	51239	ANKRD39	ankyrin repeat domain 39	TF->gene	TRANSFAC
51	ACOX1	acyl-Coenzyme A oxidase 1, palmitoyl	6667	SP1	Sp1 transcription factor	Undirected	STRING
6208	RPS14	ribosomal protein S14	6191	RPS4X	ribosomal protein S4, X-linked	Undirected	STRING,IntNetDB
6670	SP3	Sp3 transcription factor	51024	FIS1	fission 1 (mitochondrial outer membrane) homolog (S. cerevisiae)	TF->gene	TRANSFAC
6155	RPL27	ribosomal protein L27	6137	RPL13	ribosomal protein L13	Undirected	STRING,IntNetDB
6667	SP1	Sp1 transcription factor	57533	TBC1D14	TBC1 domain family, member 14	TF->gene	TRANSFAC
6176	RPLP1	ribosomal protein, large, P1	708	C1QBP	complement component 1, q subcomponent binding protein	Undirected	IntNetDB
6667	SP1	Sp1 transcription factor	4987	OPRL1	opiate receptor-like 1	TF->gene	TRANSFAC
hsa-miR-320c	hsa-miR-320c	hsa-miR-320c	23177	CEP68	centrosomal protein 68kDa	miRNA->gene	TargetScan
2908	NR3C1	nuclear receptor subfamily 3, group C, member 1 (glucocorticoid receptor)	1669	DEFA4	defensin, alpha 4, corticostatin	TF->gene	TRANSFAC
1050	CEBPA	CCAAT/enhancer binding protein (C/EBP), alpha	5478	PPIA	peptidylprolyl isomerase A (cyclophilin A)	TF->gene	TRANSFAC
6667	SP1	Sp1 transcription factor	389541	LOC389541	chromosome 7 open reading frame 59	TF->gene	TRANSFAC
4067	LYN	v-yes-1 Yamaguchi sarcoma viral related oncogene homolog	2185	PTK2B	PTK2B protein tyrosine kinase 2 beta	KEGG directed	KEGG
hsa-miR-424	hsa-miR-424	hsa-miR-424	3482	IGF2R	insulin-like growth factor 2 receptor	miRNA->gene	TargetScan
25793	FBXO7	F-box protein 7	3045	HBD	hemoglobin, delta	Undirected	IntNetDB
6667	SP1	Sp1 transcription factor	4780	NFE2L2	nuclear factor (erythroid-derived 2)-like 2	TF->gene	TRANSFAC
2353	FOS	v-fos FBJ murine osteosarcoma viral oncogene homolog	60	ACTB	actin, beta	Undirected	STRING
7431	VIM	vimentin	60	ACTB	actin, beta	Undirected	STRING,IntNetDB
1050	CEBPA	CCAAT/enhancer binding protein (C/EBP), alpha	6102	RP2	retinitis pigmentosa 2 (X-linked recessive)	TF->gene	TRANSFAC
6141	RPL18	ribosomal protein L18	6223	RPS19	ribosomal protein S19	Undirected	STRING,IntNetDB
6929	TCF3	transcription factor 3 (E2A immunoglobulin enhancer binding factors E12/E47)	387755	INSC	inscuteable homolog (Drosophila)	TF->gene	TRANSFAC
hsa-miR-130a	hsa-miR-130a	hsa-miR-130a	55437	ALS2CR2	amyotrophic lateral sclerosis 2 (juvenile) chromosome region, candidate 2	miRNA->gene	PicTar
6521	SLC4A1	solute carrier family 4, anion exchanger, member 1 (erythrocyte membrane protein band 3, Diego blood group)	6535	SLC6A8	solute carrier family 6 (neurotransmitter transporter, creatine), member 8	Undirected	IntNetDB
2114	ETS2	v-ets erythroblastosis virus E26 oncogene homolog 2 (avian)	837	CASP4	caspase 4, apoptosis-related cysteine peptidase	TF->gene	TRANSFAC
51327	ERAF	erythroid associated factor	645	BLVRB	biliverdin reductase B (flavin reductase (NADPH))	Undirected	IntNetDB
2908	NR3C1	nuclear receptor subfamily 3, group C, member 1 (glucocorticoid receptor)	10261	IGSF6	immunoglobulin superfamily, member 6	TF->gene	TRANSFAC
6169	RPL38	ribosomal protein L38	6191	RPS4X	ribosomal protein S4, X-linked	Undirected	STRING,IntNetDB
[truncated: 94 more rows]
