# Supplementary material for: Transcriptome and Network Changes in Climbers at Extreme Altitudes
Source: PLoS One. 2012 Feb 29;7(2):e31645. doi: 10.1371/journal.pone.0031645 (PMC3290542; doi:10.1371/journal.pone.0031645)
Supplement: Table S9 — The amount of flows on the nodes in ResponseNet. (XLS) [file pone.0031645.s017.xls]

## Sheet: Sheet1
Supplementary table 9 | The amount of flows on the nodes in ResponseNet
Non-TF DEGs (30)
	Entrez gene ID	Gene symble	Description	Flow	Adjusted weight	Node type	Number of co-citation
	23762	OSBP2	oxysterol binding protein 2	0.154383	0.76701	Sink	0
	6521	SLC4A1	solute carrier family 4, anion exchanger, member 1 (erythrocyte membrane protein band 3, Diego blood group)	0.140303	1	Mediator	2
	2597	GAPDH	glyceraldehyde-3-phosphate dehydrogenase	0.0857468	0.384967	Mediator	2
	5862	RAB2A	RAB2A, member RAS oncogene family	0.0857468	0.214022	Mediator	0
	7001	PRDX2	peroxiredoxin 2	0.0857468	0.23155	Mediator	1
	8991	SELENBP1	selenium binding protein 1	0.0857468	1	Sink	0
	2038	EPB42	erythrocyte membrane protein band 4.2	0.0730276	1	Sink	0
	55437	ALS2CR2	amyotrophic lateral sclerosis 2 (juvenile) chromosome region, candidate 2	0.0730276	1	Mediator	0
	3043	HBB	hemoglobin, beta	0.061182	1	Sink	1
	212	ALAS2	aminolevulinate, delta-, synthase 2	0.061182	1	Sink	4
	3042	HBM	hemoglobin, mu	0.061182	1	Sink	0
	3045	HBD	hemoglobin, delta	0.061182	1	Sink	0
	3047	HBG1	hemoglobin, gamma A	0.061182	1	Sink	0
	3048	HBG2	hemoglobin, gamma G	0.061182	1	Sink	0
	7111	TMOD1	tropomodulin 1	0.061182	1	Sink	0
	51327	ERAF	erythroid associated factor	0.061182	1	Sink	0
	51629	SLC25A39	solute carrier family 25, member 39	0.061182	1	Sink	0
	57568	SIPA1L2	signal-induced proliferation-associated 1 like 2	0.0504909	0.76701	Sink	0
	645	BLVRB	biliverdin reductase B (flavin reductase (NADPH))	0.0446754	0.640273	Sink	0
	665	BNIP3L	BCL2/adenovirus E1B 19kDa interacting protein 3-like	0.0432433	0.268958	Mediator	7
	4354	MPP1	membrane protein, palmitoylated 1, 55kDa	0.0432433	0.0610321	Mediator	0
	3684	ITGAM	integrin, alpha M (complement component 3 receptor 3 subunit)	0.0398851	0.110538	Mediator	1
	9846	GAB2	GRB2-associated binding protein 2	0.0398851	0.718301	Mediator	0
	23604	DAPK2	death-associated protein kinase 2	0.0391966	1	Sink	0
	26507	CNNM1	cyclin M1	0.0339843	-0.407283	Sink	0
	3039	HBA1	hemoglobin, alpha 1	0.0338694	1	Sink	1
	2039	EPB49	erythrocyte membrane protein band 4.9 (dematin)	0.0316706	0.35686	Sink	0
	19	ABCA1	ATP-binding cassette, sub-family A (ABC1), member 1	0.0291764	0.0801107	Mediator	1
	6622	SNCA	synuclein, alpha (non A4 component of amyloid precursor)	0.0265561	1	Sink	1
	344967	LOC344967	acyl-CoA thioesterase 7-like	0.0160639	-1	Sink	0
Hub TFs (6)
	Entrez gene ID	Gene symble	Description	Flow	Adjusted weight	Node type	Number of co-citation
	6667	SP1	Sp1 transcription factor	0.350585	1	Mediator	17
	5460	POU5F1	POU class 5 homeobox 1	0.183546	0.895439	Mediator	0
	6256	RXRA	retinoid X receptor, alpha	0.0391966	0.50049	Mediator	2
	405	ARNT	aryl hydrocarbon receptor nuclear translocator	0.0338694	0.54575	Mediator	55
	84159	ARID5B	AT rich interactive domain 5B (MRF1-like)	0.0316706	-0.18379	Mediator	0
	571	BACH1	BTB and CNC homology 1, basic leucine zipper transcription factor 1	0.0160639	0.300457	Mediator	1
Differentially expressed miRNAs (19)
			miRNA	Flow	Adjusted weight	Node type
			hsa-miR-124	0.101811	1	Source
			hsa-miR-142-3p	0.101811	-1	Source
			hsa-miR-301a	0.101811	-1	Source
			hsa-miR-320c	0.101811	1	Source
			hsa-miR-33b	0.0656549	-1	Source
			hsa-miR-410	0.0525725	-0.355167	Source
			hsa-miR-503	0.04889	0.30694	Source
			hsa-miR-320d	0.0442253	0.24585	Source
			hsa-miR-32	0.0432433	-0.23299	Source
			hsa-miR-424	0.0422907	-0.220515	Source
			hsa-miR-486-5p	0.0398851	0.18901	Source
			hsa-miR-340	0.0390601	-0.178206	Source
			hsa-miR-376a	0.0358046	-0.135571	Source
			hsa-miR-376c	0.0338694	-0.110228	Source
			hsa-miR-454	0.0335429	-0.105952	Source
			hsa-miR-130a	0.0307369	-0.0692028	Source
			hsa-miR-19b	0.0291764	-0.0487673	Source
			hsa-miR-320b	0.0272491	0.023527	Source
			hsa-miR-223	0.0265561	-0.0144505	Source
