# Supplementary material for: Transcriptome and Network Changes in Climbers at Extreme Altitudes
Source: PLoS One. 2012 Feb 29;7(2):e31645. doi: 10.1371/journal.pone.0031645 (PMC3290542; doi:10.1371/journal.pone.0031645)
Supplement: Table S12 — DGE proflie for each gene. (XLS) [file pone.0031645.s020.xls]

## Sheet: Sheet1
Supplementary table 12 | DGE proflie for each gene
note: TPM is number of tags aliged to target gene in one million tags, is used as a normalized expression value for each gene
#gene identifier	description	B-3650-raw	B-3650-norm(TPM)	B-5600-raw	B-5600-norm(TPM)	B-4400-raw	B-4400-norm(TPM)	B-100-raw	B-100-norm(TPM)	A-3650-raw	A-3650-norm(TPM)	A-5600-raw	A-5600-norm(TPM)	A-4400-raw	A-4400-norm(TPM)	A-100-raw	A-100-norm(TPM)	C-3650-raw	C-3650-norm(TPM)	C-5600-raw	C-5600-norm(TPM)	C-4400-raw	C-4400-norm(TPM)	C-100-raw	C-100-norm(TPM)	D-5600-raw	D-5600-norm(TPM)	D-4400-raw	D-4400-norm(TPM)	D-100-raw	D-100-norm(TPM)
10311	Down syndrome critical region gene 3	106	13.96	166	19.54	207	24.55	427	53.57	6	0.61	193	22.47	111	19.89	10	1.05	249	33.41	170	22.07	194	27.24	127	26.53	217	24.33	193	22.76	225	25.36
11076	tubulin polymerization promoting protein	2	0.26	0	0	0	0	2	0.25	28	2.82	3	0.35	0	0	2	0.21	7	0.94	6	0.78	2	0.28	2	0.42	5	0.56	5	0.59	0	0
81502	histocompatibility (minor) 13	63	8.3	99	11.65	115	13.64	68	8.53	117	11.8	137	15.95	112	20.07	187	19.58	201	26.97	189	24.54	189	26.54	157	32.8	143	16.03	171	20.17	105	11.83
10913	ectodysplasin A receptor	5	0.66	0	0	5	0.59	25	3.14	0	0	15	1.75	5	0.9	0	0	7	0.94	2	0.26	2	0.28	8	1.67	19	2.13	23	2.71	40	4.51
10262	splicing factor 3b, subunit 4, 49kDa	114	15.02	197	23.18	233	27.64	233	29.23	372	37.51	232	27.01	117	20.97	327	34.23	220	29.52	212	27.52	255	35.81	196	40.94	234	26.23	226	26.66	188	21.19
6522	solute carrier family 4, anion exchanger, member 2 (erythrocyte membrane protein band 3-like 1)	54	7.11	80	9.41	61	7.24	57	7.15	203	20.47	110	12.81	71	12.72	215	22.51	134	17.98	87	11.29	104	14.6	94	19.64	120	13.45	109	12.86	113	12.73
169693	chromosome 9 open reading frame 71	0	0	5	0.59	9	1.07	4	0.5	0	0	0	0	3	0.54	0	0	3	0.4	2	0.26	0	0	2	0.42	0	0	2	0.24	4	0.45
56252	YLP motif containing 1	152	20.02	261	30.72	174	20.64	136	17.06	102	10.29	461	53.67	234	41.93	134	14.03	299	40.12	237	30.77	268	37.63	216	45.12	369	41.37	309	36.45	280	31.55
5216	profilin 1	3066	403.9	6555	771.44	6316	749.2	3838	481.49	9311	938.93	7970	927.95	5547	993.97	8039	841.56	11353	1523.53	8071	1047.76	9239	1297.41	7286	1521.98	7630	855.43	8026	946.69	9149	1031.02
126731	chromosome 1 open reading frame 96	115	15.15	212	24.95	208	24.67	175	21.95	195	19.66	287	33.42	133	23.83	102	10.68	154	20.67	123	15.97	188	26.4	123	25.69	240	26.91	207	24.42	196	22.09
51400	protein phosphatase methylesterase 1	15	1.98	36	4.24	32	3.8	53	6.65	53	5.34	25	2.91	27	4.84	66	6.91	50	6.71	47	6.1	33	4.63	30	6.27	31	3.48	44	5.19	25	2.82
108	adenylate cyclase 2 (brain)	400	52.69	94	11.06	65	7.71	71	8.91	487	49.11	80	9.31	34	6.09	625	65.43	88	11.81	64	8.31	41	5.76	123	25.69	80	8.97	97	11.44	159	17.92
27123	dickkopf homolog 2 (Xenopus laevis)	0	0	0	0	0	0	2	0.25	0	0	0	0	0	0	4	0.42	0	0	0	0	0	0	0	0	0	0	7	0.83	2	0.23
100131254	hypothetical LOC100131254	5	0.66	0	0	0	0	4	0.5	0	0	0	0	0	0	0	0	0	0	0	0	0	0	0	0	0	0	0	0	0	0
63935	PDX1 C-terminal inhibiting factor 1	150	19.76	356	41.9	327	38.79	136	17.06	169	17.04	368	42.85	233	41.75	115	12.04	276	37.04	217	28.17	216	30.33	157	32.8	314	35.2	289	34.09	226	25.47
64332	nuclear factor of kappa light polypeptide gene enhancer in B-cells inhibitor, zeta	1355	178.5	2054	241.73	1996	236.76	840	105.38	6168	621.99	2382	277.34	1061	190.12	2569	268.94	1672	224.38	1122	145.66	1346	189.02	2097	438.05	2116	237.23	2125	250.65	1743	196.42
142910	lipase, family member J	0	0	0	0	0	0	0	0	0	0	0	0	0	0	0	0	0	0	2	0.26	0	0	2	0.42	0	0	0	0	0	0
117854	tripartite motif-containing 6	0	0	7	0.82	11	1.3	0	0	5	0.5	14	1.63	13	2.33	23	2.41	2	0.27	6	0.78	6	0.84	5	1.04	2	0.22	3	0.35	3	0.34
5708	proteasome (prosome, macropain) 26S subunit, non-ATPase, 2	213	28.06	295	34.72	330	39.14	553	69.38	439	44.27	314	36.56	169	30.28	591	61.87	387	51.93	279	36.22	335	47.04	262	54.73	361	40.47	360	42.46	356	40.12
5518	protein phosphatase 2 (formerly 2A), regulatory subunit A , alpha isoform	412	54.28	995	117.1	680	80.66	552	69.25	334	33.68	1588	184.89	858	153.75	555	58.1	1938	260.07	1348	174.99	1658	232.83	1831	382.48	1130	126.69	1651	194.74	1669	188.08
1822	atrophin 1	47	6.19	41	4.83	38	4.51	46	5.77	190	19.16	86	10.01	42	7.53	285	29.84	118	15.84	56	7.27	92	12.92	66	13.79	86	9.64	63	7.43	87	9.8
202018	transmembrane anterior posterior transformation 1	123	16.2	128	15.06	191	22.66	213	26.72	114	11.5	136	15.83	107	19.17	117	12.25	164	22.01	84	10.9	164	23.03	110	22.98	175	19.62	156	18.4	172	19.38
10269	zinc metallopeptidase (STE24 homolog, S. cerevisiae)	143	18.84	184	21.65	226	26.81	196	24.59	237	23.9	226	26.31	147	26.34	274	28.68	315	42.27	190	24.67	169	23.73	105	21.93	197	22.09	163	19.23	142	16
8530	cystatin F (leukocystatin)	270	35.57	868	102.15	793	94.06	617	77.4	5599	564.61	917	106.77	691	123.82	3857	403.77	1082	145.2	734	95.29	454	63.75	450	94	518	58.08	392	46.24	478	53.87
393	Rho GTPase activating protein 4	1336	176	1337	157.35	3112	369.14	3152	395.43	3969	400.24	1831	213.18	1855	332.4	5816	608.85	1922	257.93	942	122.29	2328	326.92	912	190.51	1988	222.88	2633	310.57	1878	211.64
113130	cell division cycle associated 5	53	6.98	33	3.88	11	1.3	31	3.89	5	0.5	16	1.86	9	1.61	17	1.78	13	1.74	8	1.04	6	0.84	2	0.42	21	2.35	23	2.71	49	5.52
7533	tyrosine 3-monooxygenase/tryptophan 5-monooxygenase activation protein, eta polypeptide	541	71.27	481	56.61	546	64.77	769	96.47	460	46.39	667	77.66	301	53.94	327	34.23	798	107.09	533	69.19	489	68.67	430	89.82	653	73.21	620	73.13	757	85.31
9849	zinc finger protein 518A	199	26.22	303	35.66	290	34.4	273	34.25	217	21.88	307	35.74	160	28.67	202	21.15	470	63.07	271	35.18	256	35.95	228	47.63	333	37.33	410	48.36	311	35.05
23251	KIAA1024	11	1.45	7	0.82	4	0.47	18	2.26	0	0	3	0.35	5	0.9	6	0.63	8	1.07	0	0	4	0.56	0	0	4	0.45	0	0	29	3.27
59277	netrin 4	2	0.26	0	0	3	0.36	5	0.63	0	0	7	0.82	0	0	0	0	7	0.94	2	0.26	4	0.56	3	0.63	9	1.01	5	0.59	0	0
147686	zinc finger protein 418	13	1.71	0	0	2	0.24	4	0.5	9	0.91	2	0.23	2	0.36	14	1.47	9	1.21	2	0.26	5	0.7	4	0.84	6	0.67	7	0.83	9	1.01
132724	transmembrane protease, serine 11B	20	2.63	12	1.41	5	0.59	8	1	0	0	16	1.86	3	0.54	0	0	12	1.61	8	1.04	0	0	7	1.46	9	1.01	11	1.3	8	0.9
55808	ST6 (alpha-N-acetyl-neuraminyl-2,3-beta-galactosyl-1,3)-N-acetylgalactosaminide alpha-2,6-sialyltransferase 1	4	0.53	0	0	2	0.24	16	2.01	10	1.01	6	0.7	0	0	7	0.73	4	0.54	0	0	0	0	0	0	0	0	0	0	0	0
648921	similar to LOC283693 protein	0	0	0	0	0	0	0	0	89	8.97	0	0	0	0	69	7.22	2	0.27	0	0	4	0.56	0	0	0	0	2	0.24	2	0.23
4331	menage a trois homolog 1, cyclin H assembly factor (Xenopus laevis)	5	0.66	25	2.94	13	1.54	3	0.38	32	3.23	14	1.63	0	0	6	0.63	34	4.56	8	1.04	10	1.4	18	3.76	18	2.02	35	4.13	14	1.58
93426	synaptonemal complex central element protein 1	0	0	0	0	5	0.59	0	0	0	0	0	0	0	0	0	0	0	0	0	0	0	0	2	0.42	0	0	0	0	0	0
30817	egf-like module containing, mucin-like, hormone receptor-like 2	772	101.7	1943	228.67	1813	215.06	586	73.52	1326	133.72	2442	284.32	1704	305.34	1036	108.45	1690	226.79	1317	170.97	1649	231.57	1026	214.32	1658	185.89	1556	183.53	1580	178.05
6517	solute carrier family 2 (facilitated glucose transporter), member 4	161	21.21	3	0.35	7	0.83	20	2.51	0	0	2	0.23	2	0.36	0	0	12	1.61	11	1.43	4	0.56	19	3.97	3	0.34	14	1.65	35	3.94
645958	hypothetical LOC645958	8	1.05	4	0.47	7	0.83	7	0.88	0	0	0	0	5	0.9	8	0.84	5	0.67	8	1.04	7	0.98	0	0	0	0	2	0.24	6	0.68
400752	hypothetical gene supported by BC006119	53	6.98	0	0	4	0.47	8	1	0	0	7	0.82	0	0	0	0	6	0.81	7	0.91	3	0.42	7	1.46	0	0	9	1.06	17	1.92
8743	tumor necrosis factor (ligand) superfamily, member 10	22	2.9	32	3.77	72	8.54	85	10.66	31	3.13	32	3.73	40	7.17	21	2.2	65	8.72	62	8.05	39	5.48	69	14.41	47	5.27	52	6.13	45	5.07
55745	chromosome 14 open reading frame 108	227	29.9	407	47.9	371	44.01	195	24.46	253	25.51	545	63.45	345	61.82	169	17.69	479	64.28	349	45.31	387	54.35	312	65.17	500	56.06	441	52.02	344	38.77
27229	tubulin, gamma complex associated protein 4	0	0	3	0.35	0	0	0	0	4	0.4	2	0.23	5	0.9	4	0.42	15	2.01	10	1.3	7	0.98	7	1.46	6	0.67	11	1.3	7	0.79
57190	selenoprotein N, 1	42	5.53	52	6.12	35	4.15	27	3.39	14	1.41	105	12.23	36	6.45	7	0.73	106	14.22	54	7.01	77	10.81	61	12.74	79	8.86	100	11.8	82	9.24
348751	hypothetical protein LOC348751	3	0.4	5	0.59	9	1.07	0	0	0	0	5	0.58	3	0.54	17	1.78	13	1.74	5	0.65	0	0	2	0.42	6	0.67	7	0.83	23	2.59
6051	arginyl aminopeptidase (aminopeptidase B)	277	36.49	441	51.9	590	69.99	619	77.66	427	43.06	231	26.9	172	30.82	396	41.46	358	48.04	222	28.82	351	49.29	260	54.31	252	28.25	338	39.87	323	36.4
55240	STEAP family member 3	13	1.71	8	0.94	7	0.83	10	1.25	5	0.5	12	1.4	9	1.61	11	1.15	18	2.42	10	1.3	20	2.81	9	1.88	14	1.57	9	1.06	7	0.79
10393	anaphase promoting complex subunit 10	2	0.26	2	0.24	5	0.59	4	0.5	32	3.23	7	0.82	7	1.25	18	1.88	27	3.62	23	2.99	10	1.4	19	3.97	12	1.35	7	0.83	33	3.72
654055	similar to protein tyrosine phosphatase, non-receptor type substrate 1 precursor	43	5.66	7	0.82	14	1.66	25	3.14	82	8.27	29	3.38	15	2.69	94	9.84	19	2.55	16	2.08	11	1.54	11	2.3	841	94.29	667	78.67	409	46.09
3594	interleukin 12 receptor, beta 1	224	29.51	125	14.71	133	15.78	346	43.41	80	8.07	141	16.42	113	20.25	96	10.05	215	28.85	152	19.73	146	20.5	105	21.93	172	19.28	233	27.48	195	21.97
2959	general transcription factor IIB	71	9.35	194	22.83	179	21.23	45	5.65	550	55.46	174	20.26	131	23.47	598	62.6	230	30.87	199	25.83	161	22.61	149	31.12	177	19.84	158	18.64	135	15.21
84299	chromosome 17 open reading frame 37	61	8.04	90	10.59	124	14.71	65	8.15	240	24.2	117	13.62	84	15.05	224	23.45	52	6.98	55	7.14	72	10.11	41	8.56	103	11.55	89	10.5	91	10.25
646938	similar to TBC1 domain family, member 2B	5	0.66	5	0.59	11	1.3	6	0.75	79	7.97	0	0	5	0.9	41	4.29	10	1.34	10	1.3	5	0.7	10	2.09	5	0.56	12	1.42	0	0
6664	SRY (sex determining region Y)-box 11	5	0.66	20	2.35	25	2.97	7	0.88	4	0.4	45	5.24	43	7.71	31	3.25	159	21.34	164	21.29	142	19.94	80	16.71	42	4.71	65	7.67	76	8.56
3421	isocitrate dehydrogenase 3 (NAD+) gamma	173	22.79	144	16.95	204	24.2	646	81.04	660	66.56	229	26.66	103	18.46	1104	115.57	249	33.41	185	24.02	215	30.19	197	41.15	231	25.9	295	34.8	277	31.22
80035	chromosome 15 open reading frame 28	0	0	3	0.35	0	0	0	0	0	0	2	0.23	0	0	0	0	0	0	0	0	0	0	0	0	0	0	0	0	0	0
7690	zinc finger protein 131	14	1.84	18	2.12	13	1.54	11	1.38	10	1.01	10	1.16	7	1.25	3	0.31	58	7.78	55	7.14	43	6.04	12	2.51	29	3.25	26	3.07	38	4.28
54531	mesoderm induction early response 1, family member 2	25	3.29	23	2.71	34	4.03	52	6.52	0	0	54	6.29	26	4.66	2	0.21	23	3.09	5	0.65	42	5.9	13	2.72	28	3.14	58	6.84	16	1.8
339005	WAS protein homology region 2 domain containing 1-like 1	231	30.43	102	12	86	10.2	185	23.21	29	2.92	149	17.35	51	9.14	43	4.5	222	29.79	123	15.97	89	12.5	93	19.43	214	23.99	148	17.46	190	21.41
112724	retinol dehydrogenase 13 (all-trans/9-cis)	15	1.98	10	1.18	17	2.02	25	3.14	0	0	12	1.4	10	1.79	2	0.21	19	2.55	12	1.56	8	1.12	8	1.67	11	1.23	15	1.77	15	1.69
10307	amyloid beta (A4) precursor protein-binding, family B, member 3	182	23.98	259	30.48	349	41.4	305	38.26	297	29.95	385	44.83	192	34.4	552	57.79	293	39.32	166	21.55	355	49.85	193	40.32	303	33.97	338	39.87	370	41.7
728716	hCG2036596	11	1.45	0	0	0	0	4	0.5	0	0	0	0	0	0	0	0	0	0	0	0	0	0	0	0	0	0	0	0	0	0
56654	neural proliferation, differentiation and control, 1	80	10.54	94	11.06	84	9.96	40	5.02	49	4.94	97	11.29	26	4.66	57	5.97	53	7.11	44	5.71	75	10.53	35	7.31	151	16.93	117	13.8	140	15.78
55657	zinc finger protein 692	74	9.75	113	13.3	124	14.71	92	11.54	278	28.03	140	16.3	111	19.89	302	31.61	172	23.08	108	14.02	222	31.18	118	24.65	141	15.81	203	23.94	149	16.79
3758	potassium inwardly-rectifying channel, subfamily J, member 1	7	0.92	0	0	0	0	3	0.38	0	0	0	0	0	0	0	0	0	0	0	0	0	0	0	0	0	0	0	0	4	0.45
1687	deafness, autosomal dominant 5	2	0.26	3	0.35	3	0.36	0	0	0	0	3	0.35	0	0	0	0	2	0.27	4	0.52	6	0.84	3	0.63	10	1.12	0	0	3	0.34
401285	t-complex 10-like 2 (mouse)	0	0	0	0	0	0	0	0	5	0.5	0	0	0	0	0	0	0	0	0	0	0	0	0	0	0	0	0	0	0	0
100132892	hypothetical protein LOC100132892	0	0	0	0	2	0.24	0	0	11	1.11	0	0	0	0	11	1.15	0	0	2	0.26	0	0	0	0	2	0.22	0	0	0	0
100133946	similar to mature T-cell proliferations 1	0	0	0	0	0	0	0	0	6	0.61	0	0	0	0	0	0	0	0	0	0	0	0	0	0	0	0	0	0	0	0
7089	transducin-like enhancer of split 2 (E(sp1) homolog, Drosophila)	8	1.05	9	1.06	11	1.3	3	0.38	43	4.34	23	2.68	8	1.43	32	3.35	20	2.68	13	1.69	18	2.53	15	3.13	26	2.91	17	2.01	7	0.79
10567	Rab acceptor 1 (prenylated)	50	6.59	212	24.95	198	23.49	46	5.77	700	70.59	219	25.5	144	25.8	511	53.49	132	17.71	114	14.8	119	16.71	89	18.59	189	21.19	103	12.15	108	12.17
344658	sterile alpha motif domain containing 7	60	7.9	9	1.06	3	0.36	18	2.26	0	0	3	0.35	3	0.54	0	0	5	0.67	2	0.26	4	0.56	11	2.3	2	0.22	8	0.94	25	2.82
22796	component of oligomeric golgi complex 2	108	14.23	95	11.18	81	9.61	145	18.19	159	16.03	164	19.09	72	12.9	224	23.45	228	30.6	119	15.45	149	20.92	108	22.56	152	17.04	207	24.42	287	32.34
374875	hydroxysteroid (11-beta) dehydrogenase 1-like	0	0	2	0.24	0	0	11	1.38	5	0.5	4	0.47	2	0.36	10	1.05	0	0	5	0.65	7	0.98	3	0.63	0	0	8	0.94	4	0.45
51477	myo-inositol 1-phosphate synthase A1	40	5.27	83	9.77	103	12.22	103	12.92	67	6.76	64	7.45	37	6.63	47	4.92	93	12.48	50	6.49	85	11.94	52	10.86	78	8.74	95	11.21	102	11.49
8480	RAE1 RNA export 1 homolog (S. pombe)	102	13.44	107	12.59	235	27.88	445	55.83	95	9.58	98	11.41	107	19.17	97	10.15	175	23.48	126	16.36	125	17.55	79	16.5	141	15.81	115	13.56	149	16.79
121260	solute carrier family 15, member 4	366	48.22	1107	130.28	1159	137.48	320	40.15	1190	120	785	91.4	536	96.05	653	68.36	894	119.97	540	70.1	736	103.36	444	92.75	1029	115.37	810	95.54	944	106.38
348938	ichthyin protein	0	0	0	0	0	0	0	0	0	0	2	0.23	0	0	0	0	0	0	0	0	0	0	0	0	0	0	3	0.35	0	0
55209	SET domain containing 5	114	15.02	135	15.89	158	18.74	210	26.35	72	7.26	105	12.23	66	11.83	89	9.32	201	26.97	95	12.33	132	18.54	93	19.43	198	22.2	188	22.18	196	22.09
6905	tubulin folding cofactor E	76	10.01	54	6.36	71	8.42	169	21.2	111	11.19	51	5.94	25	4.48	93	9.74	80	10.74	60	7.79	58	8.14	38	7.94	64	7.18	67	7.9	144	16.23
79969	chromosome 6 open reading frame 134	2	0.26	6	0.71	4	0.47	4	0.5	18	1.82	7	0.82	0	0	32	3.35	8	1.07	4	0.52	11	1.54	0	0	7	0.78	10	1.18	12	1.35
54677	carnitine O-octanoyltransferase	77	10.14	16	1.88	27	3.2	10	1.25	96	9.68	20	2.33	14	2.51	183	19.16	46	6.17	24	3.12	30	4.21	32	6.68	28	3.14	31	3.66	53	5.97
23367	La ribonucleoprotein domain family, member 1	397	52.3	350	41.19	387	45.91	760	95.34	328	33.08	366	42.61	239	42.83	363	38	649	87.09	425	55.17	496	69.65	437	91.29	612	68.61	625	73.72	633	71.33
149076	zinc finger protein 362	47	6.19	82	9.65	82	9.73	24	3.01	100	10.08	114	13.27	35	6.27	108	11.31	106	14.22	81	10.52	93	13.06	60	12.53	105	11.77	74	8.73	72	8.11
1874	E2F transcription factor 4, p107/p130-binding	11	1.45	61	7.18	67	7.95	27	3.39	323	32.57	73	8.5	75	13.44	395	41.35	167	22.41	145	18.82	137	19.24	134	27.99	97	10.88	107	12.62	76	8.56
55781	RIO kinase 2 (yeast)	82	10.8	56	6.59	89	10.56	229	28.73	7	0.71	81	9.43	69	12.36	22	2.3	142	19.06	90	11.68	82	11.52	56	11.7	89	9.98	75	8.85	144	16.23
3654	interleukin-1 receptor-associated kinase 1	294	38.73	379	44.6	377	44.72	274	34.37	282	28.44	555	64.62	313	56.09	305	31.93	548	73.54	436	56.6	504	70.78	408	85.23	487	54.6	466	54.97	457	51.5
5885	RAD21 homolog (S. pombe)	601	79.17	1278	150.4	1766	209.48	820	102.87	601	60.61	1152	134.13	763	136.72	688	72.02	1336	179.29	968	125.66	1069	150.12	712	148.73	1280	143.51	1390	163.95	1719	193.72
23122	cytoplasmic linker associated protein 2	88	11.59	46	5.41	57	6.76	146	18.32	103	10.39	85	9.9	27	4.84	202	21.15	135	18.12	105	13.63	73	10.25	81	16.92	49	5.49	112	13.21	71	8
388907	similar to MSTP030	0	0	0	0	0	0	0	0	38	3.83	0	0	0	0	39	4.08	0	0	0	0	0	0	0	0	0	0	0	0	0	0
2258	fibroblast growth factor 13	0	0	6	0.71	3	0.36	0	0	9	0.91	4	0.47	7	1.25	0	0	0	0	3	0.39	0	0	0	0	5	0.56	0	0	2	0.23
100131649	hypothetical protein LOC100131649	4	0.53	4	0.47	7	0.83	3	0.38	17	1.71	3	0.35	2	0.36	13	1.36	20	2.68	12	1.56	8	1.12	2	0.42	3	0.34	5	0.59	14	1.58
100132469	hypothetical protein LOC100132469	0	0	0	0	3	0.36	0	0	0	0	2	0.23	8	1.43	0	0	0	0	0	0	0	0	0	0	0	0	5	0.59	0	0
84864	MYC induced nuclear antigen	42	5.53	42	4.94	38	4.51	52	6.52	55	5.55	43	5.01	32	5.73	45	4.71	56	7.51	61	7.92	59	8.29	55	11.49	114	12.78	78	9.2	81	9.13
646890	hypothetical LOC646890	21	2.77	2	0.24	0	0	12	1.51	0	0	6	0.7	0	0	4	0.42	0	0	3	0.39	0	0	0	0	6	0.67	3	0.35	3	0.34
3178	heterogeneous nuclear ribonucleoprotein A1	3	0.4	2	0.24	2	0.24	13	1.63	0	0	3	0.35	0	0	0	0	6	0.81	4	0.52	6	0.84	4	0.84	3	0.34	11	1.3	0	0
100133961	hypothetical protein LOC100133961	3	0.4	6	0.71	15	1.78	17	2.13	0	0	5	0.58	2	0.36	0	0	21	2.82	16	2.08	16	2.25	7	1.46	18	2.02	14	1.65	13	1.46
9861	proteasome (prosome, macropain) 26S subunit, non-ATPase, 6	496	65.34	490	57.67	681	80.78	1459	183.04	562	56.67	455	52.98	309	55.37	713	74.64	417	55.96	364	47.25	382	53.64	279	58.28	532	59.64	555	65.46	573	64.57
5413	septin 5	19	2.5	23	2.71	45	5.34	10	1.25	133	13.41	55	6.4	38	6.81	165	17.27	72	9.66	32	4.15	22	3.09	39	8.15	35	3.92	19	2.24	53	5.97
23478	SEC11 homolog A (S. cerevisiae)	174	22.92	290	34.13	342	40.57	144	18.07	458	46.19	336	39.12	203	36.38	484	50.67	377	50.59	237	30.77	237	33.28	178	37.18	336	37.67	302	35.62	333	37.53
54981	chromosome 9 open reading frame 95	66	8.69	82	9.65	80	9.49	208	26.09	232	23.4	142	16.53	85	15.23	363	38	123	16.51	60	7.79	83	11.66	59	12.32	84	9.42	108	12.74	109	12.28
2281	FK506 binding protein 1B, 12.6 kDa	6	0.79	11	1.29	8	0.95	13	1.63	9	0.91	17	1.98	5	0.9	35	3.66	14	1.88	13	1.69	13	1.83	14	2.92	33	3.7	10	1.18	17	1.92
9668	zinc finger protein 432	5	0.66	0	0	0	0	2	0.25	8	0.81	2	0.23	0	0	8	0.84	4	0.54	8	1.04	5	0.7	2	0.42	0	0	0	0	0	0
84296	GINS complex subunit 4 (Sld5 homolog)	0	0	0	0	0	0	0	0	0	0	0	0	0	0	0	0	0	0	0	0	0	0	2	0.42	6	0.67	0	0	0	0
706	translocator protein (18kDa)	2190	288.5	2981	350.82	3680	436.52	7258	910.54	1547	156	3502	407.74	1803	323.08	1389	145.41	2349	315.23	1734	225.1	2144	301.08	1487	310.62	2903	325.47	2242	264.45	2927	329.85
79709	glycosyltransferase 25 domain containing 1	244	32.14	399	46.96	551	65.36	278	34.88	189	19.06	377	43.89	265	47.49	471	49.31	382	51.26	307	39.85	496	69.65	292	61	427	47.87	513	60.51	520	58.6
6920	transcription elongation factor A (SII), 3	28	3.69	11	1.29	11	1.3	29	3.64	33	3.33	53	6.17	12	2.15	35	3.66	19	2.55	7	0.91	11	1.54	13	2.72	39	4.37	22	2.59	59	6.65
9039	ubiquitin-like modifier activating enzyme 3	67	8.83	310	36.48	396	46.97	261	32.74	193	19.46	340	39.59	237	42.47	123	12.88	386	51.8	205	26.61	231	32.44	173	36.14	378	42.38	408	48.12	382	43.05
55294	F-box and WD repeat domain containing 7	46	6.06	55	6.47	74	8.78	16	2.01	261	26.32	91	10.6	56	10.03	207	21.67	171	22.95	123	15.97	96	13.48	68	14.2	140	15.7	129	15.22	104	11.72
26354	guanine nucleotide binding protein-like 3 (nucleolar)	135	17.78	83	9.77	107	12.69	193	24.21	81	8.17	111	12.92	56	10.03	127	13.29	162	21.74	104	13.5	113	15.87	90	18.8	204	22.87	156	18.4	193	21.75
81706	protein phosphatase 1, regulatory (inhibitor) subunit 14C	0	0	2	0.24	0	0	0	0	11	1.11	0	0	0	0	10	1.05	6	0.81	3	0.39	0	0	0	0	3	0.34	5	0.59	9	1.01
4311	membrane metallo-endopeptidase	416	54.8	1629	191.71	2880	341.62	1305	163.72	1531	154.39	1761	205.03	1515	271.47	769	80.5	958	128.56	1198	155.52	1717	241.11	779	162.73	1308	146.65	1545	182.24	1461	164.64
10553	HIV-1 Tat interactive protein 2, 30kDa	305	40.18	783	92.15	701	83.15	234	29.36	687	69.28	961	111.89	635	113.79	719	75.27	398	53.41	367	47.64	373	52.38	255	53.27	932	104.49	598	70.54	598	67.39
128611	zinc finger protein 831	54	7.11	46	5.41	67	7.95	68	8.53	180	18.15	39	4.54	26	4.66	98	10.26	171	22.95	100	12.98	72	10.11	63	13.16	122	13.68	116	13.68	131	14.76
29765	tropomodulin 4 (muscle)	6	0.79	15	1.77	13	1.54	22	2.76	4	0.4	11	1.28	6	1.08	6	0.63	13	1.74	14	1.82	28	3.93	10	2.09	2	0.22	26	3.07	16	1.8
494024	similar to 60S ribosomal protein L23a	0	0	0	0	0	0	0	0	0	0	5	0.58	0	0	0	0	11	1.48	2	0.26	2	0.28	0	0	0	0	0	0	0	0
83698	calneuron 1	23	3.03	2	0.24	0	0	5	0.63	0	0	2	0.23	0	0	0	0	3	0.4	3	0.39	0	0	3	0.63	11	1.23	0	0	10	1.13
349075	zinc finger protein 713	92	12.12	31	3.65	28	3.32	29	3.64	0	0	58	6.75	14	2.51	0	0	17	2.28	15	1.95	12	1.69	42	8.77	23	2.58	47	5.54	55	6.2
731511	hypothetical LOC731511	3	0.4	0	0	3	0.36	0	0	0	0	0	0	0	0	0	0	3	0.4	0	0	7	0.98	0	0	2	0.22	0	0	0	0
4323	matrix metallopeptidase 14 (membrane-inserted)	2	0.26	0	0	0	0	0	0	7	0.71	0	0	0	0	2	0.21	2	0.27	0	0	0	0	2	0.42	0	0	0	0	0	0
148206	zinc finger protein 714	75	9.88	20	2.35	21	2.49	24	3.01	90	9.08	39	4.54	25	4.48	123	12.88	52	6.98	32	4.15	35	4.91	35	7.31	17	1.91	53	6.25	34	3.83
9150	CTD (carboxy-terminal domain, RNA polymerase II, polypeptide A) phosphatase, subunit 1	18	2.37	67	7.89	45	5.34	20	2.51	73	7.36	51	5.94	49	8.78	98	10.26	94	12.61	44	5.71	69	9.69	59	12.32	101	11.32	104	12.27	55	6.2
51322	WW domain containing adaptor with coiled-coil	172	22.66	336	39.54	311	36.89	146	18.32	1101	111.03	491	57.17	351	62.9	849	88.88	458	61.46	345	44.79	328	46.06	174	36.35	450	50.45	368	43.41	288	32.46
642909	similar to C-terminal-binding protein 2 (CtBP2)	0	0	0	0	0	0	5	0.63	0	0	0	0	0	0	0	0	3	0.4	0	0	0	0	0	0	0	0	0	0	0	0
2868	G protein-coupled receptor kinase 4	5	0.66	3	0.35	2	0.24	6	0.75	3	0.3	5	0.58	0	0	6	0.63	3	0.4	6	0.78	5	0.7	6	1.25	0	0	5	0.59	8	0.9
353135	late cornified envelope 1E	14	1.84	0	0	4	0.47	0	0	0	0	0	0	3	0.54	0	0	0	0	0	0	0	0	0	0	0	0	0	0	0	0
79899	protor-2	27	3.56	45	5.3	45	5.34	27	3.39	113	11.4	63	7.34	49	8.78	349	36.53	144	19.32	95	12.33	65	9.13	77	16.08	57	6.39	56	6.61	81	9.13
10758	TRAF3 interacting protein 2	44	5.8	30	3.53	32	3.8	62	7.78	25	2.52	59	6.87	28	5.02	35	3.66	28	3.76	22	2.86	17	2.39	19	3.97	50	5.61	31	3.66	66	7.44
7702	zinc finger protein 143	132	17.39	287	33.78	343	40.69	129	16.18	151	15.23	288	33.53	203	36.38	144	15.07	257	34.49	217	28.17	236	33.14	161	33.63	270	30.27	254	29.96	215	24.23
283537	solute carrier family 46, member 3	103	13.57	157	18.48	158	18.74	171	21.45	103	10.39	144	16.77	152	27.24	259	27.11	180	24.16	118	15.32	151	21.2	76	15.88	171	19.17	157	18.52	215	24.23
285888	canopy 1 homolog (zebrafish)	3	0.4	0	0	0	0	0	0	0	0	0	0	0	0	0	0	0	0	0	0	0	0	0	0	0	0	3	0.35	0	0
55762	zinc finger protein 701	31	4.08	20	2.35	25	2.97	73	9.16	113	11.4	16	1.86	19	3.4	198	20.73	14	1.88	14	1.82	14	1.97	11	2.3	19	2.13	22	2.59	23	2.59
7471	wingless-type MMTV integration site family, member 1	23	3.03	8	0.94	8	0.95	25	3.14	0	0	20	2.33	7	1.25	0	0	22	2.95	13	1.69	19	2.67	19	3.97	4	0.45	11	1.3	28	3.16
51110	lactamase, beta 2	30	3.95	24	2.82	45	5.34	87	10.91	64	6.45	58	6.75	29	5.2	105	10.99	39	5.23	57	7.4	34	4.77	32	6.68	40	4.48	42	4.95	50	5.63
55844	protein phosphatase 2, regulatory subunit B, delta isoform	70	9.22	140	16.48	122	14.47	114	14.3	149	15.03	172	20.03	81	14.51	145	15.18	196	26.3	125	16.23	121	16.99	99	20.68	128	14.35	123	14.51	164	18.48
100130503	hypothetical protein LOC100130503	2	0.26	0	0	0	0	0	0	0	0	0	0	0	0	0	0	0	0	0	0	0	0	0	0	0	0	0	0	0	0
84839	retina and anterior neural fold homeobox 2	448	59.02	100	11.77	78	9.25	139	17.44	0	0	132	15.37	41	7.35	0	0	144	19.32	111	14.41	93	13.06	122	25.48	124	13.9	131	15.45	206	23.21
80325	ankyrin repeat and BTB (POZ) domain containing 1	982	129.37	3614	425.32	5246	622.28	3011	377.74	3171	319.77	2730	317.85	2803	502.27	3171	331.96	2359	316.57	2163	280.8	2873	403.45	1402	292.87	2702	302.93	2749	324.25	2239	252.32
79923	Nanog homeobox	2	0.26	0	0	0	0	3	0.38	6	0.61	2	0.23	0	0	3	0.31	2	0.27	0	0	0	0	0	0	0	0	0	0	7	0.79
152137	coiled-coil domain containing 50	25	3.29	20	2.35	22	2.61	4	0.5	112	11.29	26	3.03	8	1.43	296	30.99	42	5.64	34	4.41	15	2.11	24	5.01	36	4.04	30	3.54	39	4.39
85456	tankyrase 1 binding protein 1, 182kDa	5	0.66	0	0	0	0	0	0	0	0	7	0.82	2	0.36	14	1.47	2	0.27	5	0.65	13	1.83	7	1.46	7	0.78	10	1.18	23	2.59
64425	polymerase (RNA) I polypeptide E, 53kDa	181	23.84	245	28.83	191	22.66	361	45.29	42	4.24	249	28.99	102	18.28	44	4.61	143	19.19	119	15.45	93	13.06	92	19.22	208	23.32	205	24.18	257	28.96
55723	ASF1 anti-silencing function 1 homolog B (S. cerevisiae)	30	3.95	171	20.12	153	18.15	39	4.89	81	8.17	194	22.59	103	18.46	95	9.95	122	16.37	97	12.59	158	22.19	98	20.47	130	14.57	119	14.04	115	12.96
166793	zinc finger protein 509	59	7.77	67	7.89	91	10.79	58	7.28	55	5.55	62	7.22	51	9.14	100	10.47	98	13.15	54	7.01	56	7.86	33	6.89	95	10.65	82	9.67	64	7.21
91316	similar to bK246H3.1 (immunoglobulin lambda-like polypeptide 1, pre-B-cell specific)	59	7.77	130	15.3	169	20.05	47	5.9	5451	549.68	175	20.38	120	21.5	6899	722.22	241	32.34	130	16.88	207	29.07	128	26.74	127	14.24	181	21.35	149	16.79
9120	solute carrier family 16, member 6 (monocarboxylic acid transporter 7)	13	1.71	35	4.12	25	2.97	21	2.63	0	0	31	3.61	22	3.94	0	0	18	2.42	14	1.82	24	3.37	18	3.76	14	1.57	25	2.95	23	2.59
10423	CDP-diacylglycerol--inositol 3-phosphatidyltransferase (phosphatidylinositol synthase)	263	34.65	489	57.55	614	72.83	1092	137	212	21.38	418	48.67	403	72.21	164	17.17	440	59.05	408	52.97	297	41.71	275	57.45	493	55.27	347	40.93	386	43.5
2177	Fanconi anemia, complementation group D2	262	34.52	115	13.53	119	14.12	249	31.24	40	4.03	96	11.18	55	9.86	17	1.78	90	12.08	63	8.18	64	8.99	63	13.16	99	11.1	78	9.2	118	13.3
100129461	hypothetical protein LOC100129461	0	0	0	0	3	0.36	4	0.5	0	0	0	0	0	0	0	0	2	0.27	0	0	0	0	0	0	0	0	0	0	0	0
729156	GTF2I repeat domain containing 1-like	8	1.05	5	0.59	6	0.71	0	0	0	0	6	0.7	2	0.36	0	0	0	0	2	0.26	4	0.56	0	0	6	0.67	3	0.35	5	0.56
7133	tumor necrosis factor receptor superfamily, member 1B	168	22.13	641	75.44	538	63.82	411	51.56	3613	364.34	667	77.66	592	106.08	4254	445.33	916	122.92	704	91.39	920	129.19	638	133.27	805	90.25	862	101.68	512	57.7
9397	N-myristoyltransferase 2	84	11.07	35	4.12	31	3.68	82	10.29	12	1.21	85	9.9	16	2.87	19	1.99	109	14.63	51	6.62	58	8.14	55	11.49	94	10.54	72	8.49	109	12.28
7031	trefoil factor 1	0	0	0	0	0	0	0	0	5	0.5	0	0	0	0	10	1.05	0	0	0	0	0	0	0	0	0	0	0	0	0	0
80854	SET domain containing (lysine methyltransferase) 7	55	7.25	60	7.06	38	4.51	90	11.29	27	2.72	108	12.57	53	9.5	54	5.65	85	11.41	79	10.26	109	15.31	96	20.05	81	9.08	85	10.03	83	9.35
148709	actin pseudogene	0	0	0	0	0	0	0	0	0	0	3	0.35	4	0.72	0	0	4	0.54	3	0.39	2	0.28	4	0.84	0	0	5	0.59	5	0.56
8970	histone cluster 1, H2bj	0	0	0	0	0	0	0	0	0	0	4	0.47	0	0	0	0	11	1.48	6	0.78	9	1.26	2	0.42	4	0.45	4	0.47	8	0.9
100134421	hypothetical protein LOC100134421	0	0	0	0	0	0	5	0.63	0	0	0	0	0	0	7	0.73	0	0	0	0	0	0	0	0	0	0	0	0	0	0
6830	suppressor of Ty 6 homolog (S. cerevisiae)	81	10.67	200	23.54	237	28.11	85	10.66	245	24.71	248	28.87	138	24.73	448	46.9	357	47.91	272	35.31	297	41.71	193	40.32	260	29.15	300	35.39	174	19.61
6641	syntrophin, beta 1 (dystrophin-associated protein A1, 59kDa, basic component 1)	54	7.11	47	5.53	63	7.47	59	7.4	6	0.61	85	9.9	55	9.86	32	3.35	77	10.33	28	3.63	60	8.43	35	7.31	64	7.18	59	6.96	94	10.59
55507	G protein-coupled receptor, family C, group 5, member D	4	0.53	8	0.94	8	0.95	22	2.76	13	1.31	3	0.35	0	0	2	0.21	0	0	2	0.26	0	0	0	0	10	1.12	7	0.83	9	1.01
90485	zinc finger protein 835	0	0	3	0.35	0	0	2	0.25	0	0	0	0	0	0	0	0	0	0	0	0	0	0	0	0	0	0	8	0.94	2	0.23
22943	dickkopf homolog 1 (Xenopus laevis)	3	0.4	0	0	0	0	0	0	0	0	0	0	0	0	0	0	0	0	0	0	0	0	0	0	0	0	0	0	0	0
1464	chondroitin sulfate proteoglycan 4	2	0.26	3	0.35	0	0	0	0	0	0	0	0	0	0	0	0	0	0	0	0	0	0	0	0	3	0.34	0	0	0	0
114044	minichromosome maintenance complex component 3 associated protein antisense	4	0.53	3	0.35	4	0.47	4	0.5	0	0	0	0	3	0.54	0	0	2	0.27	4	0.52	0	0	3	0.63	3	0.34	6	0.71	0	0
22847	zinc finger protein 507	90	11.86	127	14.95	111	13.17	82	10.29	39	3.93	231	26.9	97	17.38	55	5.76	164	22.01	94	12.2	123	17.27	73	15.25	287	32.18	149	17.57	165	18.59
379025	hypothetical protein FLJ31306	670	88.26	968	113.92	1286	152.54	1628	204.24	1656	166.99	1112	129.47	507	90.85	1048	109.71	1222	163.99	778	101	1004	140.99	670	139.96	1070	119.96	1080	127.39	1203	135.57
1101	chondroadherin	0	0	3	0.35	2	0.24	0	0	0	0	0	0	0	0	3	0.31	0	0	0	0	0	0	0	0	6	0.67	0	0	3	0.34
10484	Sec23 homolog A (S. cerevisiae)	145	19.1	161	18.95	190	22.54	169	21.2	113	11.4	179	20.84	93	16.66	108	11.31	182	24.42	146	18.95	137	19.24	126	26.32	141	15.81	189	22.29	153	17.24
152015	ropporin, rhophilin associated protein 1B	2	0.26	0	0	0	0	0	0	0	0	0	0	0	0	0	0	0	0	0	0	0	0	0	0	0	0	0	0	0	0
1071	cholesteryl ester transfer protein, plasma	2	0.26	0	0	5	0.59	0	0	4	0.4	5	0.58	0	0	5	0.52	4	0.54	0	0	0	0	0	0	0	0	2	0.24	0	0
8727	catenin (cadherin-associated protein), alpha-like 1	20	2.63	25	2.94	13	1.54	23	2.89	18	1.82	29	3.38	3	0.54	17	1.78	30	4.03	28	3.63	17	2.39	6	1.25	60	6.73	46	5.43	10	1.13
147011	proline-rich cyclin A1-interacting protein	12	1.58	10	1.18	13	1.54	18	2.26	28	2.82	19	2.21	8	1.43	81	8.48	14	1.88	8	1.04	12	1.69	18	3.76	24	2.69	33	3.89	14	1.58
5189	peroxisomal biogenesis factor 1	52	6.85	50	5.88	71	8.42	190	23.84	294	29.65	64	7.45	35	6.27	291	30.46	179	24.02	72	9.35	103	14.46	60	12.53	81	9.08	101	11.91	101	11.38
123207	chromosome 15 open reading frame 40	76	10.01	70	8.24	71	8.42	83	10.41	25	2.52	68	7.92	54	9.68	30	3.14	60	8.05	59	7.66	57	8	44	9.19	65	7.29	68	8.02	62	6.99
6239	ras responsive element binding protein 1	29	3.82	27	3.18	14	1.66	31	3.89	57	5.75	30	3.49	11	1.97	13	1.36	30	4.03	13	1.69	24	3.37	29	6.06	23	2.58	26	3.07	3	0.34
4714	NADH dehydrogenase (ubiquinone) 1 beta subcomplex, 8, 19kDa	95	12.51	132	15.53	143	16.96	180	22.58	1098	110.72	186	21.66	87	15.59	1688	176.71	302	40.53	243	31.55	182	25.56	211	44.08	220	24.67	240	28.31	233	26.26
10274	stromal antigen 1	26	3.43	78	9.18	74	8.78	55	6.9	34	3.43	151	17.58	95	17.02	25	2.62	216	28.99	149	19.34	207	29.07	133	27.78	114	12.78	160	18.87	146	16.45
158219	tetratricopeptide repeat domain 39B	11	1.45	10	1.18	10	1.19	28	3.51	12	1.21	15	1.75	4	0.72	20	2.09	48	6.44	15	1.95	19	2.67	15	3.13	29	3.25	45	5.31	51	5.75
154664	ATP-binding cassette, sub-family A (ABC1), member 13	2	0.26	0	0	0	0	7	0.88	2	0.2	6	0.7	0	0	3	0.31	4	0.54	0	0	2	0.28	2	0.42	2	0.22	7	0.83	7	0.79
57037	ankyrin repeat and MYND domain containing 2	33	4.35	37	4.35	40	4.74	85	10.66	69	6.96	46	5.36	29	5.2	69	7.22	95	12.75	95	12.33	78	10.95	53	11.07	107	12	88	10.38	101	11.38
387	ras homolog gene family, member A	3121	411.15	6279	738.95	5685	674.35	4217	529.04	1789	180.4	7500	873.23	4500	806.36	1313	137.45	7165	961.52	5288	686.48	6882	966.43	5136	1072.87	7331	821.91	7092	836.52	7839	883.39
56894	1-acylglycerol-3-phosphate O-acyltransferase 3	47	6.19	64	7.53	71	8.42	127	15.93	304	30.66	113	13.16	58	10.39	344	36.01	243	32.61	152	19.73	222	31.18	176	36.76	189	21.19	185	21.82	149	16.79
401098	hypothetical LOC401098	15	1.98	2	0.24	0	0	2	0.25	0	0	0	0	0	0	0	0	0	0	3	0.39	0	0	3	0.63	0	0	3	0.35	3	0.34
285093	hypothetical protein FLJ33590	0	0	0	0	4	0.47	3	0.38	0	0	4	0.47	0	0	8	0.84	2	0.27	2	0.26	3	0.42	6	1.25	0	0	2	0.24	0	0
5598	mitogen-activated protein kinase 7	61	8.04	98	11.53	102	12.1	155	19.45	240	24.2	115	13.39	47	8.42	355	37.16	134	17.98	84	10.9	94	13.2	97	20.26	95	10.65	89	10.5	93	10.48
5064	paralemmin	5	0.66	0	0	0	0	3	0.38	0	0	0	0	0	0	0	0	4	0.54	0	0	9	1.26	4	0.84	3	0.34	0	0	0	0
178	amylo-1, 6-glucosidase, 4-alpha-glucanotransferase	118	15.54	106	12.47	160	18.98	81	10.16	216	21.78	169	19.68	84	15.05	272	28.47	180	24.16	149	19.34	112	15.73	106	22.14	242	27.13	178	21	217	24.45
284439	solute carrier family 25, member 42	94	12.38	44	5.18	64	7.59	320	40.15	28	2.82	52	6.05	33	5.91	54	5.65	120	16.1	46	5.97	82	11.52	48	10.03	86	9.64	84	9.91	95	10.71
27101	calcyclin binding protein	53	6.98	36	4.24	56	6.64	13	1.63	111	11.19	61	7.1	40	7.17	187	19.58	97	13.02	62	8.05	55	7.72	43	8.98	91	10.2	81	9.55	84	9.47
83605	cerebral cavernous malformation 2	330	43.47	893	105.09	709	84.1	97	12.17	96	9.68	1108	129	456	81.71	140	14.66	648	86.96	463	60.11	531	74.57	272	56.82	1623	181.96	879	103.68	509	57.36
26094	WD repeat domain 21A	7	0.92	9	1.06	16	1.9	0	0	7	0.71	8	0.93	10	1.79	28	2.93	76	10.2	39	5.06	46	6.46	20	4.18	14	1.57	24	2.83	3	0.34
23270	TSPY-like 4	62	8.17	70	8.24	75	8.9	48	6.02	476	48	105	12.23	55	9.86	644	67.42	126	16.91	88	11.42	72	10.11	64	13.37	147	16.48	107	12.62	116	13.07
10809	StAR-related lipid transfer (START) domain containing 10	68	8.96	184	21.65	231	27.4	57	7.15	90	9.08	178	20.72	104	18.64	65	6.8	155	20.8	114	14.8	164	23.03	91	19.01	170	19.06	124	14.63	138	15.55
100132532	hypothetical protein LOC100132532	12	1.58	9	1.06	20	2.37	34	4.27	38	3.83	18	2.1	8	1.43	40	4.19	45	6.04	23	2.99	25	3.51	16	3.34	9	1.01	18	2.12	12	1.35
128869	phosphatidylinositol glycan anchor biosynthesis, class U	27	3.56	11	1.29	23	2.73	80	10.04	33	3.33	26	3.03	19	3.4	33	3.45	40	5.37	27	3.51	26	3.65	38	7.94	34	3.81	47	5.54	54	6.09
10158	PDZK1 interacting protein 1	24	3.16	57	6.71	52	6.17	23	2.89	38	3.83	113	13.16	60	10.75	34	3.56	106	14.22	143	18.56	78	10.95	69	14.41	63	7.06	60	7.08	95	10.71
256356	glycerol kinase 5 (putative)	378	49.8	122	14.36	103	12.22	198	24.84	231	23.29	133	15.49	137	24.55	315	32.98	228	30.6	162	21.03	125	17.55	115	24.02	75	8.41	115	13.56	205	23.1
26071	family with sequence similarity 127, member B	0	0	0	0	0	0	0	0	69	6.96	0	0	0	0	64	6.7	0	0	2	0.26	0	0	0	0	0	0	0	0	0	0
51373	mitochondrial ribosomal protein S17	9	1.19	12	1.41	6	0.71	2	0.25	27	2.72	20	2.33	9	1.61	62	6.49	26	3.49	9	1.17	15	2.11	12	2.51	26	2.91	13	1.53	27	3.04
129852	chromosome 2 open reading frame 73	0	0	0	0	0	0	0	0	0	0	0	0	0	0	0	0	2	0.27	0	0	2	0.28	0	0	0	0	0	0	0	0
51339	dapper, antagonist of beta-catenin, homolog 1 (Xenopus laevis)	5	0.66	0	0	3	0.36	0	0	0	0	10	1.16	0	0	6	0.63	0	0	0	0	2	0.28	2	0.42	17	1.91	12	1.42	8	0.9
57594	homeobox and leucine zipper encoding	5	0.66	12	1.41	8	0.95	3	0.38	19	1.92	7	0.82	6	1.08	71	7.43	23	3.09	9	1.17	20	2.81	6	1.25	11	1.23	9	1.06	35	3.94
83473	katanin p60 subunit A-like 2	0	0	0	0	0	0	0	0	0	0	0	0	0	0	0	0	0	0	0	0	0	0	0	0	3	0.34	2	0.24	2	0.23
727942	hypothetical LOC727942	83	10.93	49	5.77	69	8.18	178	22.33	20	2.02	62	7.22	28	5.02	39	4.08	91	12.21	66	8.57	53	7.44	45	9.4	49	5.49	76	8.96	46	5.18
79634	secernin 3	26	3.43	40	4.71	40	4.74	38	4.77	91	9.18	78	9.08	56	10.03	99	10.36	85	11.41	50	6.49	82	11.52	52	10.86	55	6.17	57	6.72	68	7.66
80313	leucine rich repeat containing 27	11	1.45	0	0	4	0.47	4	0.5	14	1.41	2	0.23	3	0.54	4	0.42	7	0.94	2	0.26	7	0.98	0	0	8	0.9	4	0.47	0	0
97	acylphosphatase 1, erythrocyte (common) type	82	10.8	61	7.18	47	5.58	52	6.52	4	0.4	81	9.43	26	4.66	9	0.94	65	8.72	31	4.02	36	5.06	33	6.89	46	5.16	48	5.66	33	3.72
400061	hypothetical gene supported by NM_014886	0	0	0	0	0	0	0	0	0	0	0	0	0	0	0	0	0	0	2	0.26	0	0	0	0	0	0	0	0	0	0
201626	phosphodiesterase 12	21	2.77	26	3.06	43	5.1	69	8.66	90	9.08	43	5.01	35	6.27	72	7.54	93	12.48	36	4.67	43	6.04	48	10.03	49	5.49	46	5.43	52	5.86
221421	chromosome 6 open reading frame 206	8	1.05	28	3.3	22	2.61	9	1.13	3	0.3	36	4.19	7	1.25	4	0.42	14	1.88	9	1.17	10	1.4	8	1.67	14	1.57	7	0.83	0	0
339487	zinc finger and BTB domain containing 8 opposite strand	2	0.26	2	0.24	2	0.24	4	0.5	670	67.56	0	0	0	0	554	58	0	0	0	0	0	0	4	0.84	0	0	8	0.94	0	0
100132093	hypothetical protein LOC100132093	0	0	0	0	0	0	0	0	9	0.91	0	0	0	0	3	0.31	0	0	0	0	0	0	0	0	0	0	3	0.35	0	0
89848	FCH and double SH3 domains 1	140	18.44	280	32.95	277	32.86	289	36.26	152	15.33	287	33.42	217	38.88	350	36.64	296	39.72	211	27.39	286	40.16	148	30.92	253	28.36	309	36.45	258	29.07
100129028	similar to 60S acidic ribosomal protein P1	0	0	0	0	3	0.36	2	0.25	0	0	0	0	0	0	0	0	0	0	0	0	0	0	0	0	0	0	0	0	2	0.23
11094	chromosome 9 open reading frame 7	0	0	4	0.47	9	1.07	7	0.88	0	0	5	0.58	3	0.54	8	0.84	4	0.54	2	0.26	2	0.28	2	0.42	5	0.56	2	0.24	7	0.79
25992	sushi, nidogen and EGF-like domains 1	12	1.58	0	0	0	0	5	0.63	0	0	2	0.23	0	0	16	1.67	4	0.54	3	0.39	2	0.28	6	1.25	4	0.45	6	0.71	8	0.9
8131	chromosome 16 open reading frame 35	127	16.73	185	21.77	171	20.28	220	27.6	70	7.06	148	17.23	100	17.92	188	19.68	175	23.48	268	34.79	219	30.75	113	23.6	246	27.58	226	26.66	172	19.38
23086	exophilin 5	0	0	0	0	0	0	0	0	0	0	0	0	0	0	0	0	0	0	3	0.39	0	0	0	0	0	0	0	0	0	0
3957	lectin, galactoside-binding, soluble, 2	88	11.59	167	19.65	110	13.05	32	4.01	363	36.61	368	42.85	149	26.7	452	47.32	157	21.07	110	14.28	127	17.83	140	29.24	356	39.91	239	28.19	134	15.1
83884	solute carrier family 25 (mitochondrial carrier; ornithine transporter) member 2	2	0.26	0	0	0	0	4	0.5	0	0	0	0	0	0	4	0.42	0	0	0	0	2	0.28	0	0	0	0	2	0.24	15	1.69
388564	hypothetical gene supported by BC052596	9	1.19	18	2.12	11	1.3	13	1.63	29	2.92	14	1.63	6	1.08	39	4.08	12	1.61	9	1.17	18	2.53	15	3.13	17	1.91	20	2.36	19	2.14
729193	hypothetical LOC729193	0	0	0	0	0	0	0	0	9	0.91	0	0	0	0	3	0.31	0	0	0	0	0	0	0	0	0	0	0	0	0	0
55614	kinesin family member 16B	19	2.5	9	1.06	13	1.54	0	0	24	2.42	24	2.79	13	2.33	29	3.04	16	2.15	18	2.34	27	3.79	20	4.18	29	3.25	34	4.01	29	3.27
51028	vacuolar protein sorting 36 homolog (S. cerevisiae)	260	34.25	250	29.42	287	34.04	475	59.59	140	14.12	308	35.86	257	46.05	210	21.98	415	55.69	353	45.83	252	35.39	232	48.46	358	40.14	367	43.29	600	67.62
23593	heme binding protein 2	277	36.49	525	61.79	477	56.58	355	44.54	531	53.55	562	65.43	337	60.39	380	39.78	227	30.46	195	25.31	298	41.85	198	41.36	362	40.59	384	45.29	460	51.84
79614	chromosome 5 open reading frame 23	0	0	0	0	0	0	0	0	0	0	0	0	0	0	2	0.21	0	0	0	0	0	0	0	0	0	0	0	0	0	0
80017	chromosome 14 open reading frame 159	505	66.53	1881	221.37	2192	260.01	741	92.96	342	34.49	1299	151.24	1061	190.12	286	29.94	972	130.44	715	92.82	1040	146.05	484	101.1	1221	136.89	1043	123.02	964	108.64
4521	nudix (nucleoside diphosphate linked moiety X)-type motif 1	24	3.16	14	1.65	27	3.2	14	1.76	56	5.65	38	4.42	17	3.05	111	11.62	50	6.71	55	7.14	55	7.72	32	6.68	54	6.05	49	5.78	64	7.21
54852	progestin and adipoQ receptor family member V	58	7.64	2	0.24	2	0.24	37	4.64	13	1.31	6	0.7	0	0	13	1.36	14	1.88	5	0.65	6	0.84	16	3.34	14	1.57	9	1.06	24	2.7
79098	chromosome 1 open reading frame 116	0	0	3	0.35	0	0	0	0	0	0	0	0	0	0	2	0.21	4	0.54	0	0	2	0.28	2	0.42	4	0.45	0	0	0	0
54938	seryl-tRNA synthetase 2, mitochondrial	9	1.19	17	2	20	2.37	43	5.39	6	0.61	13	1.51	12	2.15	11	1.15	17	2.28	7	0.91	41	5.76	7	1.46	28	3.14	22	2.59	10	1.13
131965	methyltransferase like 6	37	4.87	34	4	37	4.39	68	8.53	59	5.95	44	5.12	35	6.27	82	8.58	38	5.1	25	3.25	17	2.39	15	3.13	24	2.69	18	2.12	44	4.96
10621	polymerase (RNA) III (DNA directed) polypeptide F, 39 kDa	57	7.51	14	1.65	52	6.17	59	7.4	0	0	47	5.47	16	2.87	3	0.31	69	9.26	51	6.62	41	5.76	45	9.4	73	8.18	74	8.73	98	11.04
9785	DEAH (Asp-Glu-Ala-His) box polypeptide 38	32	4.22	88	10.36	93	11.03	24	3.01	181	18.25	104	12.11	65	11.65	210	21.98	172	23.08	121	15.71	118	16.57	99	20.68	62	6.95	113	13.33	118	13.3
80781	collagen, type XVIII, alpha 1	711	93.66	1323	155.7	2206	261.67	1599	200.6	505	50.92	711	82.78	589	105.54	279	29.21	287	38.51	251	32.58	419	58.84	251	52.43	661	74.11	570	67.23	664	74.83
5261	phosphorylase kinase, gamma 2 (testis)	213	28.06	299	35.19	306	36.3	284	35.63	1040	104.87	392	45.64	188	33.69	1135	118.82	393	52.74	290	37.65	329	46.2	214	44.7	351	39.35	301	35.5	439	49.47
1028	cyclin-dependent kinase inhibitor 1C (p57, Kip2)	32	4.22	32	3.77	38	4.51	51	6.4	31	3.13	44	5.12	20	3.58	51	5.34	129	17.31	48	6.23	116	16.29	140	29.24	79	8.86	86	10.14	110	12.4
56963	RGM domain family, member A	0	0	0	0	0	0	0	0	0	0	0	0	0	0	0	0	0	0	0	0	2	0.28	2	0.42	0	0	0	0	0	0
27336	HIV-1 Tat specific factor 1	124	16.34	87	10.24	112	13.29	377	47.3	111	11.19	153	17.81	76	13.62	168	17.59	241	32.34	137	17.79	168	23.59	126	26.32	160	17.94	158	18.64	239	26.93
221785	zinc finger protein 498	92	12.12	73	8.59	84	9.96	315	39.52	37	3.73	80	9.31	44	7.88	78	8.17	124	16.64	56	7.27	74	10.39	46	9.61	117	13.12	89	10.5	106	11.95
85476	G elongation factor, mitochondrial 1	47	6.19	47	5.53	51	6.05	31	3.89	127	12.81	66	7.68	49	8.78	297	31.09	162	21.74	84	10.9	86	12.08	77	16.08	136	15.25	93	10.97	116	13.07
727765	similar to diacylglycerol O-acyltransferase homolog 1 (mouse)	0	0	0	0	0	0	2	0.25	2	0.2	0	0	0	0	5	0.52	4	0.54	0	0	0	0	0	0	0	0	0	0	4	0.45
645996	nucleosome assembly protein 1-like 6	0	0	0	0	0	0	0	0	0	0	0	0	0	0	4	0.42	0	0	0	0	0	0	0	0	0	0	0	0	0	0
9537	tumor protein p53 inducible protein 11	14	1.84	111	13.06	236	27.99	36	4.52	528	53.24	188	21.89	164	29.39	437	45.75	95	12.75	74	9.61	218	30.61	80	16.71	119	13.34	135	15.92	79	8.9
100128550	hypothetical protein LOC100128550	83	10.93	73	8.59	82	9.73	105	13.17	40	4.03	57	6.64	44	7.88	60	6.28	88	11.81	53	6.88	62	8.71	59	12.32	66	7.4	97	11.44	128	14.42
84937	zinc and ring finger 1	21	2.77	19	2.24	23	2.73	77	9.66	27	2.72	28	3.26	11	1.97	22	2.3	20	2.68	14	1.82	26	3.65	8	1.67	42	4.71	40	4.72	55	6.2
390730	similar to mCG2736	2	0.26	0	0	0	0	0	0	0	0	0	0	0	0	0	0	0	0	2	0.26	0	0	0	0	0	0	0	0	0	0
57551	TAO kinase 1	12	1.58	15	1.77	9	1.07	17	2.13	11	1.11	26	3.03	7	1.25	10	1.05	34	4.56	26	3.38	29	4.07	18	3.76	17	1.91	23	2.71	26	2.93
2840	G protein-coupled receptor 17	7	0.92	4	0.47	5	0.59	0	0	0	0	4	0.47	2	0.36	0	0	0	0	0	0	2	0.28	0	0	6	0.67	4	0.47	0	0
64405	cadherin-like 22	0	0	0	0	0	0	0	0	0	0	0	0	0	0	0	0	0	0	2	0.26	0	0	2	0.42	3	0.34	0	0	3	0.34
55582	kinesin family member 27	0	0	0	0	0	0	0	0	6	0.61	0	0	0	0	2	0.21	3	0.4	2	0.26	3	0.42	0	0	0	0	0	0	0	0
100129828	hypothetical protein LOC100129828	6	0.79	12	1.41	14	1.66	55	6.9	42	4.24	11	1.28	12	2.15	100	10.47	12	1.61	8	1.04	13	1.83	8	1.67	10	1.12	30	3.54	33	3.72
1831	TSC22 domain family, member 3	1130	148.86	3854	453.56	5383	638.53	762	95.6	4606	464.47	3544	412.63	3096	554.77	6827	714.68	4466	599.32	2541	329.87	2585	363.01	1513	316.05	4800	538.15	4108	484.55	3965	446.82
5533	protein phosphatase 3 (formerly 2B), catalytic subunit, gamma isoform	87	11.46	109	12.83	85	10.08	226	28.35	180	18.15	111	12.92	84	15.05	228	23.87	169	22.68	155	20.12	142	19.94	107	22.35	141	15.81	161	18.99	149	16.79
2534	FYN oncogene related to SRC, FGR, YES	222	29.25	276	32.48	215	25.5	761	95.47	1309	132	454	52.86	249	44.62	2137	223.71	851	114.2	466	60.5	431	60.52	363	75.83	441	49.44	473	55.79	584	65.81
51720	ubiquitin interaction motif containing 1	248	32.67	690	81.2	643	76.27	146	18.32	1815	183.03	582	67.76	393	70.42	2075	217.22	589	79.04	467	60.63	594	83.41	403	84.18	701	78.59	738	87.05	660	74.38
150291	chromosome 22 open reading frame 27	13	1.71	3	0.35	5	0.59	3	0.38	5	0.5	12	1.4	4	0.72	15	1.57	8	1.07	4	0.52	6	0.84	10	2.09	8	0.9	32	3.77	9	1.01
100131165	hypothetical protein LOC100131165	0	0	2	0.24	0	0	0	0	9	0.91	0	0	0	0	0	0	0	0	0	0	0	0	0	0	0	0	0	0	0	0
285525	Yip1 domain family, member 7	0	0	0	0	0	0	0	0	0	0	2	0.23	0	0	0	0	0	0	0	0	0	0	0	0	0	0	0	0	0	0
1477	cleavage stimulation factor, 3' pre-RNA, subunit 1, 50kDa	59	7.77	68	8	81	9.61	81	10.16	39	3.93	70	8.15	44	7.88	56	5.86	165	22.14	139	18.04	75	10.53	68	14.2	113	12.67	108	12.74	126	14.2
349152	dpy-19-like 2 pseudogene 2 (C. elegans)	13	1.71	8	0.94	11	1.3	19	2.38	0	0	25	2.91	26	4.66	2	0.21	14	1.88	20	2.6	24	3.37	13	2.72	27	3.03	28	3.3	12	1.35
100129608	hypothetical protein LOC100129608	0	0	0	0	0	0	2	0.25	0	0	0	0	0	0	0	0	0	0	0	0	0	0	0	0	0	0	0	0	0	0
5919	retinoic acid receptor responder (tazarotene induced) 2	0	0	0	0	0	0	0	0	0	0	0	0	0	0	0	0	0	0	0	0	0	0	0	0	0	0	0	0	5	0.56
54542	ring finger and CCCH-type zinc finger domains 2	26	3.43	44	5.18	29	3.44	33	4.14	37	3.73	48	5.59	24	4.3	28	2.93	51	6.84	41	5.32	34	4.77	37	7.73	45	5.05	48	5.66	33	3.72
148213	zinc finger protein 681	74	9.75	28	3.3	31	3.68	105	13.17	0	0	38	4.42	13	2.33	12	1.26	26	3.49	29	3.76	29	4.07	11	2.3	42	4.71	44	5.19	39	4.39
645125	hypothetical LOC645125	13	1.71	4	0.47	5	0.59	4	0.5	14	1.41	3	0.35	3	0.54	24	2.51	5	0.67	7	0.91	0	0	7	1.46	2	0.22	7	0.83	2	0.23
100129466	similar to BNIP3	2	0.26	0	0	0	0	4	0.5	0	0	0	0	0	0	10	1.05	0	0	0	0	0	0	0	0	0	0	0	0	0	0
8940	topoisomerase (DNA) III beta	114	15.02	127	14.95	156	18.5	72	9.03	15	1.51	205	23.87	104	18.64	12	1.26	186	24.96	158	20.51	112	15.73	89	18.59	276	30.94	170	20.05	176	19.83
646522	hypothetical LOC646522	0	0	3	0.35	0	0	0	0	0	0	3	0.35	0	0	0	0	4	0.54	0	0	2	0.28	0	0	0	0	0	0	0	0
57511	component of oligomeric golgi complex 6	38	5.01	38	4.47	42	4.98	31	3.89	105	10.59	71	8.27	29	5.2	40	4.19	79	10.6	67	8.7	50	7.02	55	11.49	52	5.83	50	5.9	91	10.25
147949	zinc finger protein 583	14	1.84	10	1.18	3	0.36	8	1	8	0.81	8	0.93	4	0.72	3	0.31	7	0.94	11	1.43	6	0.84	12	2.51	4	0.45	6	0.71	17	1.92
338692	ankyrin repeat domain 13 family, member D	236	31.09	411	48.37	714	84.69	369	46.29	2535	255.63	474	55.19	390	69.88	2836	296.89	312	41.87	192	24.93	392	55.05	280	58.49	403	45.18	483	56.97	367	41.36
84681	histidine triad nucleotide binding protein 2	6	0.79	0	0	5	0.59	25	3.14	167	16.84	5	0.58	0	0	197	20.62	4	0.54	0	0	0	0	3	0.63	3	0.34	4	0.47	5	0.56
8723	sorting nexin 4	99	13.04	56	6.59	103	12.22	194	24.34	143	14.42	91	10.6	35	6.27	158	16.54	190	25.5	112	14.54	123	17.27	83	17.34	98	10.99	148	17.46	129	14.54
274	bridging integrator 1	127	16.73	154	18.12	129	15.3	148	18.57	157	15.83	175	20.38	68	12.18	321	33.6	216	28.99	174	22.59	177	24.86	136	28.41	157	17.6	134	15.81	112	12.62
10815	complexin 1	2	0.26	0	0	2	0.24	0	0	0	0	0	0	0	0	0	0	0	0	0	0	0	0	0	0	0	0	0	0	3	0.34
916	CD3e molecule, epsilon (CD3-TCR complex)	657	86.55	406	47.78	624	74.02	2390	299.83	806	81.28	663	77.19	353	63.25	1356	141.95	1059	142.11	609	79.06	726	101.95	572	119.49	828	92.83	946	111.58	1264	142.44
388962	bolA homolog 3 (E. coli)	30	3.95	15	1.77	31	3.68	60	7.53	14	1.41	16	1.86	8	1.43	30	3.14	19	2.55	14	1.82	13	1.83	14	2.92	29	3.25	16	1.89	35	3.94
51366	ubiquitin protein ligase E3 component n-recognin 5	92	12.12	195	22.95	194	23.01	185	23.21	310	31.26	145	16.88	91	16.31	223	23.34	165	22.14	104	13.5	96	13.48	82	17.13	194	21.75	131	15.45	206	23.21
2539	glucose-6-phosphate dehydrogenase	96	12.65	306	36.01	376	44.6	228	28.6	299	30.15	389	45.29	259	46.41	170	17.8	303	40.66	216	28.04	357	50.13	231	48.25	255	28.59	386	45.53	253	28.51
401265	kelch-like 31 (Drosophila)	0	0	0	0	0	0	0	0	0	0	0	0	0	0	0	0	0	0	2	0.26	2	0.28	0	0	0	0	0	0	0	0
728914	similar to histone MH321	5	0.66	0	0	0	0	0	0	14	1.41	0	0	0	0	12	1.26	0	0	0	0	0	0	0	0	0	0	0	0	11	1.24
255631	collagen, type XXIV, alpha 1	8	1.05	6	0.71	4	0.47	4	0.5	0	0	0	0	0	0	4	0.42	0	0	2	0.26	0	0	2	0.42	10	1.12	15	1.77	25	2.82
9361	lon peptidase 1, mitochondrial	23	3.03	30	3.53	36	4.27	28	3.51	231	23.29	32	3.73	18	3.23	478	50.04	63	8.45	43	5.58	44	6.18	41	8.56	59	6.61	81	9.55	65	7.32
1947	ephrin-B1	56	7.38	52	6.12	37	4.39	134	16.81	6	0.61	81	9.43	39	6.99	0	0	77	10.33	56	7.27	63	8.85	47	9.82	73	8.18	105	12.39	195	21.97
100130685	hypothetical protein LOC100130685	0	0	0	0	0	0	0	0	3	0.3	0	0	0	0	0	0	0	0	0	0	0	0	0	0	0	0	0	0	0	0
11013	thymosin-like 8	0	0	3	0.35	0	0	0	0	0	0	0	0	0	0	0	0	4	0.54	0	0	0	0	0	0	0	0	0	0	5	0.56
116224	family with sequence similarity 122A	42	5.53	54	6.36	75	8.9	74	9.28	30	3.03	56	6.52	49	8.78	54	5.65	62	8.32	50	6.49	52	7.3	31	6.48	66	7.4	71	8.37	65	7.32
90423	ATPase, H+ transporting, lysosomal 31kDa, V1 subunit E2	4	0.53	18	2.12	11	1.3	9	1.13	25	2.52	13	1.51	3	0.54	35	3.66	24	3.22	13	1.69	10	1.4	5	1.04	37	4.15	11	1.3	4	0.45
4299	AF4/FMR2 family, member 1	559	73.64	667	78.5	783	92.88	1546	193.95	924	93.18	571	66.48	553	99.09	590	61.76	454	60.93	423	54.91	519	72.88	449	93.79	629	70.52	750	88.46	801	90.27
5702	proteasome (prosome, macropain) 26S subunit, ATPase, 3	68	8.96	87	10.24	79	9.37	165	20.7	251	25.31	172	20.03	72	12.9	316	33.08	146	19.59	107	13.89	128	17.97	109	22.77	139	15.58	154	18.16	125	14.09
10451	vav 3 guanine nucleotide exchange factor	95	12.51	209	24.6	282	33.45	476	59.72	566	57.08	193	22.47	178	31.9	256	26.8	245	32.88	178	23.11	205	28.79	131	27.36	161	18.05	138	16.28	132	14.88
2923	protein disulfide isomerase family A, member 3	234	30.83	215	25.3	243	28.82	495	62.1	498	50.22	224	26.08	124	22.22	728	76.21	280	37.57	169	21.94	184	25.84	149	31.12	166	18.61	149	17.57	228	25.69
415117	syntaxin 19	0	0	0	0	0	0	0	0	4	0.4	0	0	0	0	0	0	0	0	0	0	0	0	0	0	0	0	0	0	0	0
5910	RAP1, GTP-GDP dissociation stimulator 1	182	23.98	128	15.06	87	10.32	153	19.19	84	8.47	164	19.09	80	14.34	88	9.21	189	25.36	162	21.03	117	16.43	100	20.89	188	21.08	136	16.04	103	11.61
54700	RRN3 RNA polymerase I transcription factor homolog (S. cerevisiae)	144	18.97	216	25.42	181	21.47	180	22.58	116	11.7	293	34.11	170	30.46	111	11.62	286	38.38	178	23.11	164	23.03	131	27.36	290	32.51	229	27.01	223	25.13
10476	ATP synthase, H+ transporting, mitochondrial F0 complex, subunit d	0	0	0	0	0	0	0	0	1777	179.19	0	0	0	0	3231	338.24	0	0	0	0	0	0	0	0	0	0	0	0	0	0
767811	H2B histone family, member X, pseudogene	3	0.4	4	0.47	7	0.83	4	0.5	0	0	12	1.4	7	1.25	0	0	13	1.74	10	1.3	10	1.4	3	0.63	15	1.68	15	1.77	7	0.79
30816	endogenous retroviral family W, env(C7), member 1	2	0.26	0	0	0	0	2	0.25	31	3.13	0	0	0	0	49	5.13	0	0	0	0	0	0	3	0.63	0	0	0	0	0	0
5387	postmeiotic segregation increased 2-like 3	0	0	5	0.59	3	0.36	0	0	0	0	2	0.23	9	1.61	0	0	10	1.34	6	0.78	7	0.98	13	2.72	6	0.67	8	0.94	26	2.93
388324	inhibitor of CDK interacting with cyclin A1	0	0	0	0	0	0	0	0	6	0.61	2	0.23	0	0	5	0.52	0	0	0	0	0	0	0	0	4	0.45	2	0.24	0	0
352999	chromosome 6 open reading frame 58	17	2.24	45	5.3	41	4.86	10	1.25	0	0	75	8.73	130	23.29	0	0	348	46.7	306	39.72	146	20.5	131	27.36	168	18.84	194	22.88	51	5.75
26130	GTPase activating protein and VPS9 domains 1	136	17.92	189	22.24	235	27.88	306	38.39	663	66.86	162	18.86	114	20.43	447	46.79	134	17.98	139	18.04	135	18.96	88	18.38	223	25	168	19.82	203	22.88
728773	similar to poly(A) binding protein, cytoplasmic 1	6	0.79	0	0	0	0	0	0	0	0	0	0	0	0	0	0	0	0	0	0	0	0	0	0	0	0	0	0	0	0
4638	myosin light chain kinase	321	42.29	251	29.54	346	41.04	725	90.95	0	0	279	32.48	134	24.01	3	0.31	236	31.67	135	17.53	138	19.38	108	22.56	1337	149.9	1028	121.26	1688	190.22
84818	interleukin 17 receptor C	7	0.92	6	0.71	8	0.95	15	1.88	0	0	6	0.7	8	1.43	2	0.21	12	1.61	6	0.78	6	0.84	7	1.46	7	0.78	5	0.59	23	2.59
23556	phosphatidylinositol glycan anchor biosynthesis, class N	28	3.69	31	3.65	27	3.2	91	11.42	14	1.41	40	4.66	18	3.23	29	3.04	60	8.05	47	6.1	33	4.63	37	7.73	46	5.16	28	3.3	36	4.06
2334	AF4/FMR2 family, member 2	3	0.4	0	0	6	0.71	0	0	0	0	5	0.58	2	0.36	6	0.63	2	0.27	0	0	6	0.84	3	0.63	0	0	17	2.01	0	0
79576	NFKB activating protein	36	4.74	42	4.94	81	9.61	49	6.15	0	0	57	6.64	42	7.53	0	0	28	3.76	27	3.51	34	4.77	36	7.52	36	4.04	67	7.9	33	3.72
3916	lysosomal-associated membrane protein 1	188	24.77	265	31.19	381	45.19	219	27.47	2338	235.77	282	32.83	244	43.72	5129	536.93	381	51.13	206	26.74	386	54.21	164	34.26	331	37.11	351	41.4	335	37.75
222696	zinc finger and SCAN domain containing 23	4	0.53	0	0	0	0	0	0	0	0	0	0	0	0	0	0	0	0	0	0	0	0	0	0	0	0	0	0	0	0
54737	M-phase phosphoprotein 8	88	11.59	110	12.95	111	13.17	155	19.45	65	6.55	102	11.88	70	12.54	25	2.62	235	31.54	122	15.84	166	23.31	91	19.01	150	16.82	176	20.76	250	28.17
121278	tryptophan hydroxylase 2	0	0	0	0	0	0	0	0	0	0	0	0	0	0	0	0	0	0	0	0	0	0	0	0	0	0	0	0	10	1.13
51124	immediate early response 3 interacting protein 1	169	22.26	99	11.65	137	16.25	259	32.49	155	15.63	157	18.28	91	16.31	214	22.4	251	33.68	138	17.91	122	17.13	131	27.36	187	20.97	155	18.28	212	23.89
10100	tetraspanin 2	109	14.36	315	37.07	289	34.28	217	27.22	343	34.59	399	46.46	204	36.55	135	14.13	362	48.58	285	37	245	34.4	147	30.71	393	44.06	395	46.59	318	35.84
56923	neuromedin U receptor 2	8	1.05	3	0.35	0	0	0	0	0	0	0	0	2	0.36	0	0	3	0.4	0	0	2	0.28	0	0	0	0	2	0.24	0	0
3092	huntingtin interacting protein 1	83	10.93	117	13.77	117	13.88	47	5.9	27	2.72	206	23.98	150	26.88	34	3.56	74	9.93	86	11.16	68	9.55	59	12.32	123	13.79	193	22.76	171	19.27
654	bone morphogenetic protein 6	60	7.9	59	6.94	50	5.93	79	9.91	16	1.61	61	7.1	24	4.3	12	1.26	134	17.98	43	5.58	30	4.21	40	8.36	57	6.39	77	9.08	108	12.17
8242	jumonji, AT rich interactive domain 1C	435	57.31	687	80.85	767	90.98	497	62.35	693	69.88	921	107.23	545	97.66	908	95.05	467	62.67	367	47.64	395	55.47	352	73.53	812	91.04	689	81.27	825	92.97
7942	transcription factor EB	284	37.41	841	98.97	641	76.03	182	22.83	209	21.08	888	103.39	578	103.57	125	13.09	578	77.57	377	48.94	587	82.43	404	84.39	621	69.62	604	71.24	538	60.63
5594	mitogen-activated protein kinase 1	474	62.44	1284	151.11	1466	173.9	616	77.28	1356	136.74	1289	150.08	927	166.11	865	90.55	1164	156.2	1043	135.4	1152	161.77	606	126.59	1375	154.16	1343	158.41	878	98.94
6948	transcobalamin II; macrocytic anemia	4	0.53	13	1.53	6	0.71	3	0.38	15	1.51	8	0.93	5	0.9	18	1.88	12	1.61	6	0.78	18	2.53	8	1.67	19	2.13	18	2.12	2	0.23
7764	zinc finger protein 217	2384	314.06	3290	387.19	3583	425.01	3650	457.91	771	77.75	2146	249.86	2392	428.62	1098	114.94	2040	273.76	1539	199.79	1986	278.89	1252	261.53	1713	192.05	2217	261.5	2873	323.76
4636	myosin, light chain 5, regulatory	0	0	0	0	0	0	0	0	61	6.15	0	0	0	0	70	7.33	0	0	0	0	0	0	0	0	0	0	0	0	0	0
84923	family with sequence similarity 104, member A	223	29.38	313	36.84	304	36.06	246	30.86	170	17.14	258	30.04	216	38.71	159	16.64	315	42.27	412	53.49	284	39.88	202	42.2	424	47.54	361	42.58	282	31.78
2123	ecotropic viral integration site 2A	427	56.25	1239	145.81	1651	195.84	329	41.27	1574	158.72	1292	150.43	838	150.16	1454	152.21	816	109.5	553	71.79	765	107.43	490	102.36	1137	127.47	1047	123.5	830	93.53
163882	chromosome 1 open reading frame 71	0	0	0	0	0	0	0	0	0	0	5	0.58	0	0	0	0	19	2.55	3	0.39	10	1.4	6	1.25	10	1.12	8	0.94	10	1.13
7038	thyroglobulin	0	0	0	0	0	0	0	0	15	1.51	0	0	0	0	4	0.42	0	0	0	0	0	0	0	0	0	0	0	0	0	0
5202	prefoldin subunit 2	86	11.33	114	13.42	106	12.57	68	8.53	256	25.82	115	13.39	88	15.77	340	35.59	144	19.32	111	14.41	106	14.89	68	14.2	184	20.63	117	13.8	133	14.99
100129250	similar to hCG1811779	240	31.62	732	86.15	556	65.95	173	21.7	0	0	635	73.93	358	64.15	0	0	289	38.78	155	20.12	188	26.4	144	30.08	714	80.05	433	51.07	382	43.05
55147	RNA binding motif protein 23	71	9.35	347	40.84	258	30.6	43	5.39	714	72	280	32.6	237	42.47	562	58.83	292	39.19	270	35.05	257	36.09	193	40.32	286	32.06	232	27.37	149	16.79
10094	actin related protein 2/3 complex, subunit 3, 21kDa	23	3.03	124	14.59	151	17.91	78	9.79	84	8.47	137	15.95	160	28.67	81	8.48	558	74.88	322	41.8	321	45.08	271	56.61	236	26.46	323	38.1	236	26.6
51225	ABI gene family, member 3	122	16.07	99	11.65	123	14.59	386	48.43	85	8.57	179	20.84	92	16.49	146	15.28	267	35.83	160	20.77	229	32.16	148	30.92	146	16.37	171	20.17	136	15.33
100132419	hypothetical protein LOC100132419	4	0.53	0	0	0	0	0	0	0	0	0	0	0	0	0	0	0	0	0	0	3	0.42	0	0	0	0	0	0	0	0
5816	parvalbumin	16	2.11	16	1.88	2	0.24	0	0	0	0	6	0.7	2	0.36	0	0	22	2.95	8	1.04	2	0.28	9	1.88	12	1.35	4	0.47	16	1.8
63946	DMRT-like family C2	3	0.4	15	1.77	14	1.66	7	0.88	11	1.11	3	0.35	8	1.43	5	0.52	0	0	2	0.26	7	0.98	7	1.46	3	0.34	4	0.47	0	0
93474	zinc finger protein 670	0	0	3	0.35	0	0	2	0.25	25	2.52	2	0.23	2	0.36	57	5.97	11	1.48	13	1.69	8	1.12	6	1.25	24	2.69	11	1.3	0	0
100131662	hypothetical LOC100131662	12	1.58	5	0.59	4	0.47	28	3.51	6	0.61	38	4.42	16	2.87	11	1.15	8	1.07	5	0.65	11	1.54	8	1.67	31	3.48	36	4.25	29	3.27
5380	postmeiotic segregation increased 2-like 2 pseudogene	3	0.4	0	0	0	0	0	0	0	0	0	0	0	0	0	0	0	0	0	0	0	0	0	0	0	0	0	0	0	0
57703	KIAA1604 protein	77	10.14	149	17.54	118	14	42	5.27	23	2.32	148	17.23	98	17.56	2	0.21	169	22.68	147	19.08	101	14.18	111	23.19	204	22.87	151	17.81	144	16.23
10462	C-type lectin domain family 10, member A	307	40.44	293	34.48	85	10.08	107	13.42	44	4.44	749	87.21	155	27.77	79	8.27	115	15.43	59	7.66	133	18.68	61	12.74	404	45.29	394	46.47	286	32.23
9371	kinesin family member 3B	97	12.78	86	10.12	90	10.68	196	24.59	89	8.97	88	10.25	42	7.53	98	10.26	112	15.03	120	15.58	102	14.32	80	16.71	140	15.7	129	15.22	171	19.27
10594	PRP8 pre-mRNA processing factor 8 homolog (S. cerevisiae)	344	45.32	322	37.9	452	53.62	1259	157.95	1202	121.21	373	43.43	281	50.35	2260	236.59	801	107.49	631	81.92	644	90.44	433	90.45	603	67.6	609	71.83	641	72.24
11144	DMC1 dosage suppressor of mck1 homolog, meiosis-specific homologous recombination (yeast)	118	15.54	8	0.94	5	0.59	31	3.89	0	0	9	1.05	3	0.54	0	0	7	0.94	9	1.17	5	0.7	9	1.88	8	0.9	12	1.42	0	0
23241	phosphofurin acidic cluster sorting protein 2	60	7.9	43	5.06	44	5.22	127	15.93	111	11.19	59	6.87	34	6.09	142	14.87	83	11.14	39	5.06	98	13.76	70	14.62	75	8.41	70	8.26	110	12.4
6375	chemokine (C motif) ligand 1	2	0.26	3	0.35	4	0.47	5	0.63	0	0	7	0.82	5	0.9	0	0	4	0.54	8	1.04	4	0.56	0	0	11	1.23	7	0.83	15	1.69
6444	sarcoglycan, delta (35kDa dystrophin-associated glycoprotein)	0	0	0	0	0	0	0	0	0	0	0	0	0	0	0	0	4	0.54	0	0	2	0.28	0	0	3	0.34	0	0	3	0.34
29078	chromosome 6 open reading frame 66	43	5.66	43	5.06	49	5.81	19	2.38	308	31.06	45	5.24	29	5.2	536	56.11	44	5.9	40	5.19	29	4.07	25	5.22	66	7.4	82	9.67	50	5.63
2806	glutamic-oxaloacetic transaminase 2, mitochondrial (aspartate aminotransferase 2)	13	1.71	39	4.59	15	1.78	22	2.76	95	9.58	60	6.99	13	2.33	61	6.39	92	12.35	74	9.61	73	10.25	60	12.53	72	8.07	62	7.31	33	3.72
729570	similar to hCG1793303	0	0	2	0.24	3	0.36	0	0	79	7.97	0	0	0	0	111	11.62	0	0	5	0.65	5	0.7	3	0.63	0	0	4	0.47	0	0
100129842	zinc finger protein 737	4	0.53	0	0	4	0.47	10	1.25	6	0.61	2	0.23	2	0.36	3	0.31	9	1.21	6	0.78	8	1.12	2	0.42	0	0	2	0.24	13	1.46
8864	period homolog 2 (Drosophila)	11	1.45	24	2.82	19	2.25	17	2.13	56	5.65	25	2.91	10	1.79	66	6.91	24	3.22	11	1.43	18	2.53	15	3.13	38	4.26	45	5.31	63	7.1
4696	NADH dehydrogenase (ubiquinone) 1 alpha subcomplex, 3, 9kDa	73	9.62	165	19.42	142	16.84	59	7.4	642	64.74	219	25.5	145	25.98	682	71.39	146	19.59	136	17.66	104	14.6	134	27.99	178	19.96	138	16.28	131	14.76
10537	ubiquitin D	9	1.19	0	0	2	0.24	0	0	0	0	2	0.23	0	0	0	0	0	0	0	0	0	0	2	0.42	0	0	2	0.24	0	0
121536	AE binding protein 2	240	31.62	168	19.77	153	18.15	292	36.63	249	25.11	283	32.95	117	20.97	222	23.24	330	44.28	202	26.22	208	29.21	223	46.58	287	32.18	210	24.77	307	34.6
728843	hypothetical LOC728843	0	0	0	0	0	0	5	0.63	0	0	0	0	0	0	0	0	0	0	0	0	0	0	9	1.88	2	0.22	0	0	0	0
729603	calcium binding protein P22 pseudogene	11	1.45	12	1.41	25	2.97	20	2.51	11	1.11	31	3.61	14	2.51	0	0	14	1.88	7	0.91	29	4.07	6	1.25	12	1.35	14	1.65	29	3.27
80139	zinc finger protein 703	0	0	0	0	0	0	0	0	4	0.4	0	0	0	0	0	0	0	0	0	0	0	0	0	0	0	0	2	0.24	0	0
57089	ectonucleoside triphosphate diphosphohydrolase 7	47	6.19	19	2.24	16	1.9	37	4.64	30	3.03	36	4.19	16	2.87	6	0.63	27	3.62	14	1.82	27	3.79	17	3.55	14	1.57	26	3.07	13	1.46
51569	ubiquitin-fold modifier 1	148	19.5	179	21.07	195	23.13	242	30.36	1422	143.4	330	38.42	179	32.08	1757	183.93	273	36.64	169	21.94	154	21.63	153	31.96	269	30.16	211	24.89	268	30.2
90024	hypothetical LOC90024	24	3.16	29	3.41	39	4.63	28	3.51	29	2.92	46	5.36	21	3.76	31	3.25	23	3.09	20	2.6	19	2.67	15	3.13	22	2.47	16	1.89	53	5.97
55870	ash1 (absent, small, or homeotic)-like (Drosophila)	19	2.5	143	16.83	198	23.49	19	2.38	170	17.14	148	17.23	99	17.74	156	16.33	189	25.36	144	18.69	119	16.71	120	25.07	181	20.29	215	25.36	186	20.96
1415	crystallin, beta B2	16	2.11	26	3.06	25	2.97	10	1.25	9	0.91	0	0	0	0	11	1.15	0	0	0	0	3	0.42	0	0	0	0	0	0	0	0
644936	cytoplasmic beta-actin pseudogene	10	1.32	0	0	0	0	0	0	0	0	3	0.35	0	0	2	0.21	3	0.4	7	0.91	0	0	0	0	0	0	4	0.47	0	0
55863	transmembrane protein 126B	81	10.67	71	8.36	71	8.42	22	2.76	0	0	76	8.85	69	12.36	0	0	130	17.45	100	12.98	68	9.55	46	9.61	106	11.88	79	9.32	132	14.88
728997	similar to mCG13783	0	0	0	0	0	0	0	0	0	0	5	0.58	3	0.54	0	0	2	0.27	0	0	6	0.84	2	0.42	3	0.34	4	0.47	0	0
10956	amplified in osteosarcoma	1403	184.83	2158	253.97	2540	301.29	3373	423.15	954	96.2	2230	259.64	1410	252.66	1296	135.67	1386	186	1024	132.93	1583	222.3	990	206.8	1899	212.9	1738	205	2004	225.84
4204	methyl CpG binding protein 2 (Rett syndrome)	152	20.02	255	30.01	273	32.38	257	32.24	252	25.41	290	33.76	137	24.55	338	35.38	255	34.22	144	18.69	178	25	132	27.57	229	25.67	328	38.69	283	31.89
255403	zinc finger protein 718	8	1.05	6	0.71	6	0.71	8	1	0	0	14	1.63	3	0.54	0	0	0	0	6	0.78	0	0	0	0	0	0	3	0.35	0	0
728142	hypothetical LOC728142	0	0	0	0	0	0	4	0.5	16	1.61	7	0.82	3	0.54	36	3.77	10	1.34	6	0.78	6	0.84	4	0.84	9	1.01	4	0.47	7	0.79
23683	protein kinase D3	304	40.05	230	27.07	201	23.84	653	81.92	237	23.9	340	39.59	150	26.88	217	22.72	290	38.92	191	24.8	255	35.81	168	35.09	271	30.38	241	28.43	371	41.81
389672	hCG1984468	3	0.4	0	0	0	0	0	0	0	0	0	0	0	0	0	0	0	0	0	0	2	0.28	0	0	0	0	0	0	0	0
23344	family with sequence similarity 62 (C2 domain containing), member A	133	17.52	136	16.01	125	14.83	78	9.79	872	87.93	198	23.05	122	21.86	1469	153.78	266	35.7	259	33.62	247	34.69	189	39.48	319	35.76	290	34.21	208	23.44
2165	coagulation factor XIII, B polypeptide	7	0.92	0	0	0	0	0	0	0	0	0	0	0	0	0	0	0	0	0	0	0	0	0	0	0	0	0	0	0	0
80237	elongation factor RNA polymerase II-like 3	8	1.05	8	0.94	8	0.95	6	0.75	0	0	15	1.75	0	0	0	0	0	0	7	0.91	5	0.7	0	0	15	1.68	6	0.71	26	2.93
114793	formin-like 2	40	5.27	33	3.88	30	3.56	73	9.16	9	0.91	30	3.49	40	7.17	51	5.34	66	8.86	34	4.41	50	7.02	40	8.36	94	10.54	53	6.25	12	1.35
57544	thioredoxin domain containing 16	32	4.22	29	3.41	40	4.74	79	9.91	51	5.14	39	4.54	19	3.4	67	7.01	25	3.35	19	2.47	39	5.48	31	6.48	78	8.74	49	5.78	45	5.07
57419	solute carrier family 24 (sodium/potassium/calcium exchanger), member 3	16	2.11	6	0.71	10	1.19	0	0	17	1.71	12	1.4	4	0.72	20	2.09	15	2.01	9	1.17	5	0.7	11	2.3	5	0.56	16	1.89	25	2.82
56478	eukaryotic translation initiation factor 4E nuclear import factor 1	47	6.19	60	7.06	67	7.95	141	17.69	76	7.66	48	5.59	23	4.12	76	7.96	121	16.24	57	7.4	96	13.48	47	9.82	89	9.98	103	12.15	70	7.89
400451	family with sequence similarity 174, member B	8	1.05	16	1.88	12	1.42	0	0	4	0.4	8	0.93	4	0.72	3	0.31	2	0.27	0	0	6	0.84	0	0	4	0.45	6	0.71	13	1.46
196872	hypothetical LOC196872	0	0	0	0	0	0	0	0	3	0.3	0	0	0	0	9	0.94	0	0	0	0	0	0	0	0	0	0	0	0	0	0
5685	proteasome (prosome, macropain) subunit, alpha type, 4	347	45.71	362	42.6	480	56.94	956	119.93	1074	108.3	380	44.24	296	53.04	935	97.88	528	70.86	356	46.22	455	63.89	385	80.42	503	56.39	485	57.21	511	57.59
115992	ring finger protein 166	487	64.16	719	84.62	1285	152.43	1842	231.09	0	0	892	103.86	568	101.78	0	0	570	76.49	276	35.83	587	82.43	411	85.85	623	69.85	778	91.77	824	92.86
169841	zinc finger protein 169	8	1.05	15	1.77	14	1.66	0	0	124	12.5	31	3.61	7	1.25	104	10.89	17	2.28	5	0.65	20	2.81	2	0.42	5	0.56	11	1.3	0	0
7128	tumor necrosis factor, alpha-induced protein 3	2991	394.02	2052	241.49	2193	260.13	3936	493.79	1083	109.21	3613	420.66	1557	279	776	81.24	5060	679.03	1296	168.24	2755	386.88	3743	781.88	2954	331.19	2845	335.58	4249	478.83
142891	sterile alpha motif domain containing 8	19	2.5	52	6.12	42	4.98	11	1.38	55	5.55	44	5.12	32	5.73	5	0.52	27	3.62	31	4.02	42	5.9	19	3.97	46	5.16	35	4.13	30	3.38
653583	pleckstrin homology-like domain, family B, member 3	13	1.71	4	0.47	11	1.3	59	7.4	42	4.24	24	2.79	13	2.33	59	6.18	32	4.29	14	1.82	12	1.69	21	4.39	17	1.91	32	3.77	41	4.62
100131210	hypothetical protein LOC100131210	0	0	0	0	0	0	0	0	0	0	0	0	0	0	3	0.31	0	0	0	0	0	0	0	0	0	0	5	0.59	2	0.23
51643	transmembrane BAX inhibitor motif containing 4	304	40.05	555	65.32	656	77.81	133	16.69	639	64.44	592	68.93	337	60.39	563	58.94	265	35.56	177	22.98	245	34.4	183	38.23	401	44.96	343	40.46	389	43.84
57689	leucine rich repeat containing 4C	0	0	0	0	0	0	0	0	4	0.4	0	0	0	0	0	0	0	0	0	0	0	0	0	0	0	0	0	0	6	0.68
8924	hect domain and RLD 2	40	5.27	73	8.59	59	7	66	8.28	147	14.82	173	20.14	94	16.84	178	18.63	218	29.25	98	12.72	154	21.63	90	18.8	248	27.8	221	26.07	189	21.3
3145	hydroxymethylbilane synthase	16	2.11	23	2.71	22	2.61	24	3.01	22	2.22	20	2.33	15	2.69	12	1.26	30	4.03	33	4.28	24	3.37	19	3.97	41	4.6	37	4.36	22	2.48
140700	sterile alpha motif domain containing 10	14	1.84	5	0.59	22	2.61	12	1.51	6	0.61	19	2.21	15	2.69	12	1.26	31	4.16	10	1.3	23	3.23	4	0.84	8	0.9	48	5.66	27	3.04
10171	RNA terminal phosphate cyclase-like 1	46	6.06	36	4.24	34	4.03	106	13.3	23	2.32	50	5.82	41	7.35	30	3.14	53	7.11	30	3.89	35	4.91	33	6.89	37	4.15	45	5.31	61	6.87
24148	PRP6 pre-mRNA processing factor 6 homolog (S. cerevisiae)	6	0.79	0	0	2	0.24	2	0.25	6	0.61	2	0.23	3	0.54	2	0.21	4	0.54	9	1.17	10	1.4	5	1.04	9	1.01	4	0.47	4	0.45
221262	chromosome 6 open reading frame 185	0	0	2	0.24	0	0	0	0	0	0	0	0	0	0	0	0	0	0	0	0	0	0	0	0	0	0	0	0	0	0
4318	matrix metallopeptidase 9 (gelatinase B, 92kDa gelatinase, 92kDa type IV collagenase)	263	34.65	781	91.91	2095	248.51	984	123.45	183	18.45	1253	145.89	1433	256.78	105	10.99	165	22.14	275	35.7	647	90.86	150	31.33	498	55.83	625	73.72	389	43.84
3604	tumor necrosis factor receptor superfamily, member 9	18	2.37	12	1.41	10	1.19	6	0.75	0	0	9	1.05	3	0.54	0	0	5	0.67	2	0.26	9	1.26	8	1.67	0	0	5	0.59	12	1.35
100128510	hypothetical protein LOC100128510	7	0.92	3	0.35	2	0.24	13	1.63	25	2.52	6	0.7	2	0.36	33	3.45	0	0	5	0.65	0	0	4	0.84	4	0.45	13	1.53	0	0
100132345	hypothetical protein LOC100132345	0	0	0	0	0	0	0	0	21	2.12	5	0.58	0	0	30	3.14	8	1.07	6	0.78	2	0.28	6	1.25	0	0	12	1.42	0	0
80760	inter-alpha (globulin) inhibitor H5	418	55.07	116	13.65	93	11.03	167	20.95	28	2.82	128	14.9	87	15.59	10	1.05	124	16.64	72	9.35	74	10.39	127	26.53	104	11.66	128	15.1	178	20.06
55270	nudix (nucleoside diphosphate linked moiety X)-type motif 15	17	2.24	8	0.94	11	1.3	109	13.67	38	3.83	8	0.93	2	0.36	0	0	14	1.88	7	0.91	14	1.97	5	1.04	2	0.22	10	1.18	0	0
100133583	similar to major histocompatibility complex, class II, DQ beta 1	3	0.4	8	0.94	3	0.36	9	1.13	0	0	41	4.77	17	3.05	0	0	10	1.34	15	1.95	10	1.4	15	3.13	23	2.58	24	2.83	25	2.82
1414	crystallin, beta B1	0	0	0	0	0	0	0	0	0	0	3	0.35	0	0	4	0.42	2	0.27	0	0	0	0	0	0	0	0	0	0	0	0
9200	protein tyrosine phosphatase-like (proline instead of catalytic arginine), member A	19	2.5	0	0	5	0.59	14	1.76	38	3.83	0	0	2	0.36	21	2.2	8	1.07	6	0.78	10	1.4	3	0.63	16	1.79	7	0.83	16	1.8
728154	hypothetical LOC728154	0	0	0	0	0	0	0	0	0	0	0	0	0	0	0	0	0	0	0	0	0	0	0	0	0	0	3	0.35	0	0
161497	stereocilin	2	0.26	0	0	0	0	0	0	9	0.91	6	0.7	2	0.36	7	0.73	3	0.4	0	0	0	0	0	0	5	0.56	13	1.53	0	0
5833	phosphate cytidylyltransferase 2, ethanolamine	10	1.32	31	3.65	17	2.02	9	1.13	43	4.34	42	4.89	15	2.69	94	9.84	93	12.48	56	7.27	71	9.97	37	7.73	37	4.15	66	7.78	82	9.24
196383	Rab interacting lysosomal protein-like 2	346	45.58	1213	142.75	905	107.35	169	21.2	533	53.75	1496	174.18	674	120.77	589	61.66	533	71.53	438	56.86	480	67.41	422	88.15	957	107.29	746	87.99	379	42.71
27314	RAB30, member RAS oncogene family	10	1.32	8	0.94	5	0.59	5	0.63	21	2.12	3	0.35	0	0	14	1.47	17	2.28	6	0.78	11	1.54	0	0	24	2.69	11	1.3	13	1.46
646626	hypothetical LOC646626	0	0	3	0.35	0	0	0	0	0	0	3	0.35	3	0.54	0	0	11	1.48	0	0	2	0.28	3	0.63	9	1.01	5	0.59	0	0
55450	calcium/calmodulin-dependent protein kinase II inhibitor 1	22	2.9	4	0.47	20	2.37	98	12.29	21	2.12	17	1.98	10	1.79	26	2.72	41	5.5	13	1.69	19	2.67	16	3.34	47	5.27	15	1.77	42	4.73
284415	V-set and transmembrane domain containing 1	18	2.37	40	4.71	52	6.17	43	5.39	180	18.15	112	13.04	69	12.36	391	40.93	34	4.56	20	2.6	33	4.63	24	5.01	75	8.41	75	8.85	71	8
8714	ATP-binding cassette, sub-family C (CFTR/MRP), member 3	27	3.56	30	3.53	16	1.9	27	3.39	47	4.74	62	7.22	22	3.94	126	13.19	55	7.38	22	2.86	14	1.97	10	2.09	53	5.94	43	5.07	83	9.35
51255	ring finger protein 181	79	10.41	128	15.06	166	19.69	126	15.81	26	2.62	138	16.07	109	19.53	7	0.73	162	21.74	140	18.17	124	17.41	151	31.54	143	16.03	151	17.81	165	18.59
100130960	similar to CDK105	7	0.92	3	0.35	0	0	0	0	0	0	0	0	0	0	0	0	0	0	0	0	0	0	0	0	0	0	0	0	0	0
84446	BR serine/threonine kinase 1	0	0	4	0.47	4	0.47	3	0.38	33	3.33	0	0	0	0	71	7.43	0	0	0	0	0	0	0	0	0	0	0	0	0	0
1736	dyskeratosis congenita 1, dyskerin	96	12.65	84	9.89	107	12.69	167	20.95	117	11.8	122	14.2	83	14.87	252	26.38	203	27.24	144	18.69	135	18.96	114	23.81	151	16.93	153	18.05	197	22.2
414189	centaurin, gamma-like family, member 3	3	0.4	40	4.71	32	3.8	28	3.51	0	0	39	4.54	41	7.35	0	0	89	11.94	77	10	80	11.23	67	14	66	7.4	86	10.14	68	7.66
23132	RAD54-like 2 (S. cerevisiae)	17	2.24	14	1.65	25	2.97	22	2.76	2	0.2	13	1.51	2	0.36	0	0	25	3.35	18	2.34	14	1.97	21	4.39	19	2.13	28	3.3	25	2.82
643281	similar to hCG2041840	3	0.4	0	0	0	0	0	0	0	0	0	0	0	0	0	0	0	0	0	0	0	0	0	0	0	0	0	0	0	0
23400	ATPase type 13A2	8	1.05	16	1.88	17	2.02	33	4.14	37	3.73	20	2.33	19	3.4	39	4.08	79	10.6	29	3.76	51	7.16	30	6.27	41	4.6	58	6.84	19	2.14
401233	similar to HIV TAT specific factor 1; cofactor required for Tat activation of HIV-1 transcription	0	0	0	0	2	0.24	0	0	12	1.21	0	0	0	0	17	1.78	2	0.27	0	0	0	0	0	0	0	0	0	0	0	0
9627	synuclein, alpha interacting protein	0	0	0	0	0	0	5	0.63	0	0	2	0.23	0	0	0	0	0	0	0	0	0	0	0	0	3	0.34	0	0	0	0
255809	chromosome 19 open reading frame 38	89	11.72	135	15.89	272	32.26	298	37.39	453	45.68	243	28.29	163	29.21	495	51.82	238	31.94	197	25.57	225	31.6	172	35.93	197	22.09	251	29.61	180	20.28
3635	inositol polyphosphate-5-phosphatase, 145kDa	299	39.39	1176	138.4	1341	159.07	408	51.19	769	77.55	1556	181.17	857	153.57	1022	106.99	1306	175.26	975	126.57	1029	144.5	792	165.44	1205	135.1	951	112.17	854	96.24
9379	neurexin 2	0	0	0	0	0	0	0	0	0	0	0	0	0	0	0	0	0	0	3	0.39	0	0	0	0	0	0	0	0	0	0
785	calcium channel, voltage-dependent, beta 4 subunit	0	0	2	0.24	3	0.36	0	0	5	0.5	3	0.35	0	0	3	0.31	2	0.27	0	0	0	0	0	0	0	0	2	0.24	0	0
3347	histatin 3	2	0.26	0	0	0	0	0	0	0	0	0	0	0	0	0	0	0	0	0	0	0	0	0	0	0	0	0	0	0	0
3813	killer cell immunoglobulin-like receptor, three domains, short cytoplasmic tail, 1	0	0	0	0	0	0	0	0	0	0	0	0	0	0	0	0	4	0.54	0	0	2	0.28	2	0.42	0	0	0	0	0	0
2048	EPH receptor B2	0	0	2	0.24	0	0	6	0.75	9	0.91	13	1.51	2	0.36	6	0.63	6	0.81	7	0.91	13	1.83	0	0	0	0	5	0.59	3	0.34
4249	mannosyl (alpha-1,6-)-glycoprotein beta-1,6-N-acetyl-glucosaminyltransferase	0	0	0	0	0	0	3	0.38	0	0	0	0	0	0	0	0	2	0.27	0	0	2	0.28	0	0	3	0.34	2	0.24	0	0
54566	erythrocyte membrane protein band 4.1 like 4B	3	0.4	0	0	0	0	0	0	0	0	0	0	0	0	0	0	0	0	0	0	0	0	0	0	0	0	0	0	0	0
7432	vasoactive intestinal peptide	0	0	0	0	0	0	0	0	0	0	0	0	2	0.36	6	0.63	0	0	0	0	0	0	0	0	0	0	0	0	0	0
6429	splicing factor, arginine/serine-rich 4	319	42.02	415	48.84	441	52.31	315	39.52	324	32.67	399	46.46	211	37.81	462	48.36	595	79.85	389	50.5	538	75.55	317	66.22	435	48.77	529	62.4	480	54.09
338321	NLR family, pyrin domain containing 9	5	0.66	13	1.53	6	0.71	4	0.5	11	1.11	6	0.7	3	0.54	14	1.47	2	0.27	0	0	3	0.42	0	0	7	0.78	2	0.24	6	0.68
9456	homer homolog 1 (Drosophila)	0	0	0	0	0	0	8	1	0	0	0	0	0	0	0	0	5	0.67	0	0	0	0	0	0	0	0	0	0	0	0
10868	ubiquitin specific peptidase 20	80	10.54	201	23.66	202	23.96	51	6.4	404	40.74	264	30.74	137	24.55	469	49.1	285	38.25	224	29.08	253	35.53	144	30.08	331	37.11	247	29.13	248	27.95
167227	DCP2 decapping enzyme homolog (S. cerevisiae)	796	104.86	1266	148.99	1678	199.04	980	122.94	827	83.4	1417	164.98	1122	201.05	497	52.03	1010	135.54	782	101.52	982	137.9	689	143.93	1211	135.77	1391	164.07	1677	188.98
90411	multiple coagulation factor deficiency 2	254	33.46	99	11.65	152	18.03	506	63.48	72	7.26	167	19.44	76	13.62	126	13.19	173	23.22	133	17.27	162	22.75	109	22.77	172	19.28	158	18.64	195	21.97
55120	Fanconi anemia, complementation group L	11	1.45	12	1.41	15	1.78	9	1.13	4	0.4	7	0.82	6	1.08	16	1.67	12	1.61	5	0.65	9	1.26	17	3.55	17	1.91	8	0.94	23	2.59
100134172	hypothetical protein LOC100134172	0	0	0	0	0	0	0	0	9	0.91	0	0	0	0	5	0.52	0	0	0	0	0	0	0	0	0	0	0	0	0	0
871	serpin peptidase inhibitor, clade H (heat shock protein 47), member 1, (collagen binding protein 1)	17	2.24	7	0.82	6	0.71	6	0.75	0	0	22	2.56	4	0.72	14	1.47	12	1.61	10	1.3	12	1.69	11	2.3	13	1.46	5	0.59	4	0.45
51433	anaphase promoting complex subunit 5	142	18.71	204	24.01	171	20.28	124	15.56	576	58.08	280	32.6	253	45.34	564	59.04	563	75.55	432	56.08	353	49.57	361	75.41	303	33.97	345	40.69	371	41.81
7980	tissue factor pathway inhibitor 2	0	0	2	0.24	0	0	0	0	0	0	0	0	0	0	0	0	0	0	2	0.26	0	0	2	0.42	2	0.22	0	0	20	2.25
54440	SAM and SH3 domain containing 3	471	62.05	642	75.55	559	66.31	409	51.31	2334	235.36	1068	124.35	622	111.46	2905	304.11	1353	181.57	854	110.86	882	123.86	537	112.17	1027	115.14	824	97.19	770	86.77
3840	karyopherin alpha 4 (importin alpha 3)	195	25.69	255	30.01	284	33.69	265	33.25	92	9.28	258	30.04	130	23.29	77	8.06	336	45.09	161	20.9	263	36.93	162	33.84	242	27.13	278	32.79	260	29.3
10773	zinc finger and BTB domain containing 6	38	5.01	48	5.65	71	8.42	82	10.29	40	4.03	34	3.96	58	10.39	65	6.8	38	5.1	50	6.49	39	5.48	36	7.52	48	5.38	48	5.66	63	7.1
79413	zinc finger, BED-type containing 2	0	0	0	0	0	0	0	0	8	0.81	0	0	0	0	0	0	0	0	0	0	0	0	0	0	0	0	4	0.47	0	0
169355	indoleamine-pyrrole 2,3 dioxygenase-like 1	3	0.4	3	0.35	3	0.36	0	0	6	0.61	2	0.23	5	0.9	11	1.15	0	0	2	0.26	4	0.56	6	1.25	12	1.35	2	0.24	17	1.92
64395	germ cell-less homolog 1 (Drosophila)	11	1.45	39	4.59	34	4.03	30	3.76	17	1.71	45	5.24	16	2.87	0	0	20	2.68	14	1.82	25	3.51	6	1.25	18	2.02	25	2.95	27	3.04
84167	chromosome 19 open reading frame 44	2	0.26	0	0	2	0.24	4	0.5	32	3.23	2	0.23	0	0	7	0.73	5	0.67	2	0.26	2	0.28	3	0.63	4	0.45	9	1.06	7	0.79
26038	chromodomain helicase DNA binding protein 5	0	0	0	0	0	0	0	0	0	0	0	0	0	0	0	0	2	0.27	0	0	0	0	0	0	0	0	3	0.35	0	0
9392	transforming growth factor, beta receptor associated protein 1	0	0	0	0	0	0	0	0	0	0	0	0	0	0	0	0	0	0	2	0.26	4	0.56	0	0	4	0.45	0	0	0	0
114299	paralemmin 2	3	0.4	0	0	0	0	3	0.38	0	0	0	0	0	0	0	0	2	0.27	0	0	0	0	0	0	0	0	0	0	0	0
728613	programmed cell death 6 pseudogene	8	1.05	2	0.24	5	0.59	30	3.76	5	0.5	4	0.47	5	0.9	15	1.57	8	1.07	10	1.3	0	0	2	0.42	4	0.45	10	1.18	7	0.79
4356	membrane protein, palmitoylated 3 (MAGUK p55 subfamily member 3)	0	0	0	0	0	0	0	0	11	1.11	0	0	0	0	3	0.31	6	0.81	2	0.26	0	0	0	0	0	0	2	0.24	0	0
22926	activating transcription factor 6	83	10.93	169	19.89	157	18.62	330	41.4	208	20.97	128	14.9	86	15.41	173	18.11	110	14.76	76	9.87	105	14.74	69	14.41	115	12.89	148	17.46	153	17.24
728464	chromosome 6 open reading frame 186	0	0	0	0	0	0	0	0	0	0	0	0	0	0	5	0.52	0	0	0	0	0	0	0	0	0	0	0	0	0	0
392138	olfactory receptor, family 2, subfamily A, member 25	3	0.4	0	0	0	0	0	0	0	0	0	0	0	0	0	0	0	0	0	0	0	0	0	0	0	0	0	0	0	0
100129387	hypothetical protein LOC100129387	20	2.63	22	2.59	19	2.25	6	0.75	47	4.74	33	3.84	9	1.61	54	5.65	32	4.29	16	2.08	21	2.95	22	4.6	25	2.8	26	3.07	30	3.38
10201	non-metastatic cells 6, protein expressed in (nucleoside-diphosphate kinase)	0	0	0	0	2	0.24	0	0	0	0	0	0	0	0	2	0.21	7	0.94	3	0.39	2	0.28	0	0	0	0	3	0.35	0	0
51070	nitric oxide synthase interacting protein	89	11.72	337	39.66	249	29.54	51	6.4	238	24	376	43.78	193	34.58	337	35.28	222	29.79	182	23.63	209	29.35	148	30.92	582	65.25	323	38.1	317	35.72
26051	protein phosphatase 1, regulatory (inhibitor) subunit 16B	60	7.9	53	6.24	66	7.83	61	7.65	87	8.77	95	11.06	34	6.09	77	8.06	179	24.02	146	18.95	84	11.8	103	21.52	95	10.65	91	10.73	155	17.47
7384	ubiquinol-cytochrome c reductase core protein I	51	6.72	157	18.48	117	13.88	33	4.14	839	84.61	189	22.01	110	19.71	1355	141.85	194	26.03	183	23.76	163	22.89	156	32.59	193	21.64	154	18.16	163	18.37
730054	similar to hCG2040642	0	0	0	0	0	0	0	0	2	0.2	0	0	0	0	0	0	0	0	0	0	0	0	0	0	0	0	0	0	0	0
1855	dishevelled, dsh homolog 1 (Drosophila)	0	0	0	0	0	0	0	0	0	0	4	0.47	2	0.36	0	0	0	0	0	0	0	0	0	0	4	0.45	0	0	2	0.23
83544	dynein, axonemal, light chain 1	6	0.79	11	1.29	14	1.66	33	4.14	5	0.5	12	1.4	6	1.08	32	3.35	30	4.03	25	3.25	7	0.98	15	3.13	21	2.35	23	2.71	46	5.18
2937	glutathione synthetase	28	3.69	19	2.24	31	3.68	88	11.04	50	5.04	40	4.66	19	3.4	165	17.27	102	13.69	62	8.05	62	8.71	39	8.15	56	6.28	74	8.73	99	11.16
3099	hexokinase 2	140	18.44	273	32.13	439	52.07	340	42.65	185	18.66	209	24.33	160	28.67	325	34.02	306	41.06	258	33.49	299	41.99	236	49.3	250	28.03	265	31.26	241	27.16
162427	family with sequence similarity 134, member C	129	16.99	132	15.53	206	24.44	335	42.03	173	17.45	203	23.64	171	30.64	403	42.19	387	51.93	230	29.86	292	41	177	36.97	250	28.03	309	36.45	285	32.12
100130595	hypothetical LOC100130595	0	0	0	0	0	0	0	0	0	0	0	0	0	0	2	0.21	0	0	0	0	0	0	0	0	0	0	0	0	0	0
9913	suppressor of Ty 7 (S. cerevisiae)-like	125	16.47	165	19.42	123	14.59	111	13.93	141	14.22	203	23.64	126	22.58	210	21.98	239	32.07	169	21.94	174	24.43	127	26.53	291	32.63	195	23	237	26.71
56674	TMEM9 domain family, member B	175	23.05	245	28.83	263	31.2	145	18.19	326	32.87	270	31.44	168	30.1	339	35.49	372	49.92	269	34.92	282	39.6	188	39.27	279	31.28	268	31.61	301	33.92
11309	solute carrier organic anion transporter family, member 2B1	0	0	0	0	0	0	0	0	0	0	0	0	0	0	0	0	0	0	0	0	0	0	0	0	0	0	0	0	6	0.68
134147	carboxymethylenebutenolidase homolog (Pseudomonas)	10	1.32	4	0.47	0	0	28	3.51	0	0	0	0	15	2.69	0	0	4	0.54	9	1.17	4	0.56	0	0	8	0.9	2	0.24	10	1.13
79675	FAST kinase domains 1	43	5.66	52	6.12	41	4.86	82	10.29	42	4.24	66	7.68	36	6.45	65	6.8	79	10.6	49	6.36	69	9.69	38	7.94	87	9.75	115	13.56	135	15.21
100129236	similar to hCG1653500	2	0.26	0	0	0	0	0	0	0	0	0	0	0	0	0	0	0	0	0	0	0	0	0	0	0	0	0	0	0	0
7140	troponin T type 3 (skeletal, fast)	0	0	3	0.35	4	0.47	23	2.89	3	0.3	4	0.47	0	0	7	0.73	0	0	2	0.26	2	0.28	2	0.42	4	0.45	0	0	2	0.23
80185	chromosome 8 open reading frame 41	21	2.77	17	2	35	4.15	19	2.38	27	2.72	15	1.75	15	2.69	28	2.93	17	2.28	20	2.6	21	2.95	21	4.39	24	2.69	24	2.83	22	2.48
414918	family with sequence similarity 116, member B	9	1.19	9	1.06	2	0.24	8	1	30	3.03	19	2.21	8	1.43	28	2.93	16	2.15	7	0.91	8	1.12	9	1.88	20	2.24	18	2.12	9	1.01
10006	abl-interactor 1	543	71.53	810	95.33	995	118.03	646	81.04	1154	116.37	1055	122.83	793	142.1	1229	128.66	1216	163.18	856	111.12	892	125.26	685	143.09	807	90.48	805	94.95	956	107.73
8939	far upstream element (FUSE) binding protein 3	201	26.48	110	12.95	202	23.96	705	88.44	176	17.75	197	22.94	145	25.98	165	17.27	479	64.28	324	42.06	311	43.67	196	40.94	301	33.75	342	40.34	425	47.89
54557	small glutamine-rich tetratricopeptide repeat (TPR)-containing, beta	1055	138.98	1014	119.33	1073	127.28	1468	184.17	151	15.23	1171	136.34	635	113.79	111	11.62	594	79.71	412	53.49	638	89.59	446	93.17	1115	125.01	1069	126.09	1296	146.05
163486	DENN/MADD domain containing 1B	0	0	4	0.47	2	0.24	0	0	0	0	0	0	0	0	0	0	0	0	0	0	0	0	2	0.42	6	0.67	6	0.71	0	0
79960	PHD finger protein 17	313	41.23	220	25.89	207	24.55	378	47.42	195	19.66	298	34.7	162	29.03	287	30.04	449	60.25	234	30.38	313	43.95	248	51.81	384	43.05	392	46.24	345	38.88
5500	protein phosphatase 1, catalytic subunit, beta isoform	1081	142.41	1469	172.88	1916	227.27	1496	187.68	1183	119.29	1853	215.75	1056	189.23	909	95.16	1842	247.19	1455	188.89	1430	200.81	1184	247.33	1699	190.48	1506	177.64	1724	194.28
25780	RAS guanyl releasing protein 3 (calcium and DAG-regulated)	31	4.08	24	2.82	16	1.9	20	2.51	15	1.51	50	5.82	38	6.81	27	2.83	56	7.51	48	6.23	48	6.74	29	6.06	58	6.5	111	13.09	122	13.75
138162	chromosome 9 open reading frame 116	5	0.66	0	0	2	0.24	6	0.75	0	0	3	0.35	2	0.36	0	0	4	0.54	0	0	0	0	2	0.42	6	0.67	0	0	5	0.56
2274	four and a half LIM domains 2	8	1.05	2	0.24	0	0	0	0	0	0	2	0.23	0	0	6	0.63	2	0.27	9	1.17	2	0.28	0	0	4	0.45	9	1.06	9	1.01
114783	lemur tyrosine kinase 3	12	1.58	3	0.35	3	0.36	2	0.25	9	0.91	15	1.75	2	0.36	7	0.73	5	0.67	0	0	7	0.98	2	0.42	9	1.01	4	0.47	3	0.34
23381	Smg-5 homolog, nonsense mediated mRNA decay factor (C. elegans)	90	11.86	175	20.6	249	29.54	71	8.91	309	31.16	123	14.32	67	12.01	371	38.84	168	22.54	74	9.61	163	22.89	79	16.5	152	17.04	209	24.65	117	13.18
4828	neuromedin B	7	0.92	4	0.47	10	1.19	27	3.39	20	2.02	7	0.82	5	0.9	12	1.26	14	1.88	6	0.78	11	1.54	5	1.04	15	1.68	2	0.24	18	2.03
100134395	hypothetical protein LOC100134395	2	0.26	0	0	0	0	0	0	0	0	0	0	0	0	0	0	0	0	2	0.26	0	0	0	0	4	0.45	0	0	0	0
7746	zinc finger protein 193	42	5.53	26	3.06	53	6.29	99	12.42	27	2.72	36	4.19	37	6.63	23	2.41	53	7.11	34	4.41	16	2.25	19	3.97	64	7.18	37	4.36	90	10.14
51523	CXXC finger 5	27	3.56	43	5.06	22	2.61	14	1.76	0	0	48	5.59	5	0.9	0	0	43	5.77	74	9.61	46	6.46	42	8.77	20	2.24	44	5.19	30	3.38
7448	vitronectin	0	0	0	0	0	0	0	0	0	0	0	0	0	0	0	0	3	0.4	0	0	0	0	0	0	0	0	0	0	0	0
677796	small nucleolar RNA, H/ACA box 5C	0	0	0	0	0	0	0	0	0	0	2	0.23	0	0	0	0	0	0	0	0	0	0	0	0	0	0	4	0.47	0	0
79623	UDP-N-acetyl-alpha-D-galactosamine:polypeptide N-acetylgalactosaminyltransferase 14 (GalNAc-T14)	6	0.79	26	3.06	29	3.44	2	0.25	30	3.03	22	2.56	11	1.97	20	2.09	2	0.27	3	0.39	8	1.12	0	0	4	0.45	16	1.89	0	0
6559	solute carrier family 12 (sodium/chloride transporters), member 3	13	1.71	0	0	0	0	2	0.25	0	0	0	0	0	0	0	0	2	0.27	6	0.78	0	0	0	0	4	0.45	0	0	0	0
339804	chromosome 2 open reading frame 74	110	14.49	114	13.42	108	12.81	82	10.29	25	2.52	100	11.64	51	9.14	28	2.93	105	14.09	105	13.63	96	13.48	63	13.16	210	23.54	150	17.69	95	10.71
346157	zinc finger protein 391	2	0.26	0	0	0	0	2	0.25	0	0	2	0.23	2	0.36	0	0	0	0	2	0.26	0	0	0	0	0	0	4	0.47	0	0
5998	regulator of G-protein signaling 3	64	8.43	240	28.24	233	27.64	169	21.2	175	17.65	278	32.37	127	22.76	285	29.84	238	31.94	131	17.01	151	21.2	96	20.05	215	24.1	194	22.88	159	17.92
114884	oxysterol binding protein-like 10	9	1.19	9	1.06	6	0.71	24	3.01	8	0.81	8	0.93	4	0.72	16	1.67	23	3.09	26	3.38	25	3.51	2	0.42	15	1.68	23	2.71	36	4.06
3849	keratin 2	0	0	2	0.24	0	0	0	0	5	0.5	0	0	0	0	0	0	2	0.27	0	0	3	0.42	0	0	3	0.34	3	0.35	0	0
84226	chromosome 2 open reading frame 16	6	0.79	0	0	0	0	0	0	0	0	0	0	0	0	0	0	0	0	0	0	0	0	0	0	0	0	0	0	0	0
57118	calcium/calmodulin-dependent protein kinase ID	38	5.01	134	15.77	120	14.23	37	4.64	61	6.15	95	11.06	58	10.39	51	5.34	83	11.14	58	7.53	74	10.39	51	10.65	89	9.98	90	10.62	51	5.75
8312	axin 1	297	39.13	251	29.54	320	37.96	831	104.25	271	27.33	290	33.76	110	19.71	436	45.64	249	33.41	144	18.69	254	35.67	106	22.14	212	23.77	296	34.91	218	24.57
10214	synovial sarcoma, X breakpoint 3	2	0.26	0	0	0	0	0	0	0	0	0	0	0	0	0	0	0	0	0	0	0	0	0	0	0	0	0	0	0	0
7046	transforming growth factor, beta receptor 1	247	32.54	552	64.96	593	70.34	198	24.84	135	13.61	546	63.57	339	60.75	174	18.22	508	68.17	402	52.19	396	55.61	293	61.21	478	53.59	481	56.74	464	52.29
3903	leukocyte-associated immunoglobulin-like receptor 1	177	23.32	171	20.12	134	15.89	352	44.16	179	18.05	323	37.61	172	30.82	128	13.4	424	56.9	277	35.96	415	58.28	337	70.4	278	31.17	333	39.28	410	46.2
10922	Fas-activated serine/threonine kinase	339	44.66	285	33.54	291	34.52	683	85.68	110	11.09	312	36.33	220	39.42	99	10.36	374	50.19	239	31.03	330	46.34	247	51.6	425	47.65	400	47.18	481	54.2
83861	radial spoke 3 homolog (Chlamydomonas)	14	1.84	15	1.77	14	1.66	19	2.38	24	2.42	21	2.45	9	1.61	7	0.73	25	3.35	20	2.6	16	2.25	18	3.76	28	3.14	36	4.25	20	2.25
80233	chromosome 17 open reading frame 70	13	1.71	17	2	36	4.27	18	2.26	33	3.33	20	2.33	31	5.55	61	6.39	27	3.62	9	1.17	33	4.63	20	4.18	21	2.35	50	5.9	30	3.38
55001	tetratricopeptide repeat domain 22	12	1.58	9	1.06	8	0.95	12	1.51	4	0.4	14	1.63	9	1.61	0	0	38	5.1	6	0.78	34	4.77	11	2.3	7	0.78	11	1.3	20	2.25
65125	WNK lysine deficient protein kinase 1	568	74.83	869	102.27	1112	131.9	509	63.86	280	28.24	876	101.99	686	122.92	264	27.64	1223	164.12	958	124.37	970	136.22	696	145.39	1186	132.97	1323	156.05	1021	115.06
1175	adaptor-related protein complex 2, sigma 1 subunit	174	22.92	209	24.6	303	35.94	361	45.29	487	49.11	304	35.39	188	33.69	771	80.71	454	60.93	443	57.51	452	63.47	362	75.62	403	45.18	419	49.42	486	54.77
729436	hypothetical LOC729436	0	0	2	0.24	0	0	11	1.38	0	0	0	0	3	0.54	2	0.21	7	0.94	11	1.43	4	0.56	0	0	0	0	0	0	5	0.56
80727	tweety homolog 3 (Drosophila)	116	15.28	93	10.94	111	13.17	183	22.96	135	13.61	173	20.14	128	22.94	201	21.04	168	22.54	124	16.1	156	21.91	144	30.08	166	18.61	185	21.82	166	18.71
344752	arylacetamide deacetylase-like 2	3	0.4	0	0	0	0	0	0	0	0	0	0	0	0	0	0	0	0	0	0	0	0	0	0	0	0	0	0	0	0
7360	UDP-glucose pyrophosphorylase 2	336	44.26	398	46.84	678	80.42	554	69.5	1422	143.4	389	45.29	291	52.14	1473	154.2	460	61.73	353	45.83	379	53.22	229	47.84	521	58.41	413	48.71	606	68.29
3048	hemoglobin, gamma G	134	17.65	14483	1704.46	12197	1446.8	16	2.01	0	0	3165	368.5	4523	810.48	0	0	20	2.68	626	81.27	467	65.58	10	2.09	715	80.16	416	49.07	22	2.48
1161	excision repair cross-complementing rodent repair deficiency, complementation group 8	7	0.92	9	1.06	12	1.42	12	1.51	12	1.21	18	2.1	6	1.08	7	0.73	21	2.82	31	4.02	13	1.83	9	1.88	23	2.58	14	1.65	26	2.93
25805	BMP and activin membrane-bound inhibitor homolog (Xenopus laevis)	0	0	3	0.35	0	0	0	0	0	0	7	0.82	0	0	8	0.84	2	0.27	2	0.26	0	0	0	0	2	0.22	2	0.24	5	0.56
646127	hypothetical LOC646127	4	0.53	0	0	0	0	0	0	4	0.4	2	0.23	0	0	5	0.52	0	0	0	0	0	0	0	0	0	0	0	0	0	0
5729	prostaglandin D2 receptor (DP)	77	10.14	69	8.12	77	9.13	93	11.67	15	1.51	86	10.01	78	13.98	97	10.15	143	19.19	147	19.08	49	6.88	46	9.61	110	12.33	90	10.62	151	17.02
54106	toll-like receptor 9	23	3.03	65	7.65	91	10.79	30	3.76	23	2.32	37	4.31	28	5.02	37	3.87	22	2.95	12	1.56	23	3.23	8	1.67	28	3.14	51	6.02	19	2.14
1915	eukaryotic translation elongation factor 1 alpha 1	76	10.01	52	6.12	39	4.63	84	10.54	250	25.21	79	9.2	36	6.45	378	39.57	121	16.24	96	12.46	88	12.36	67	14	77	8.63	90	10.62	115	12.96
140685	zinc finger and BTB domain containing 46	2	0.26	5	0.59	6	0.71	2	0.25	0	0	7	0.82	0	0	0	0	0	0	4	0.52	6	0.84	0	0	0	0	0	0	0	0
23300	ATM interactor	130	17.13	104	12.24	100	11.86	67	8.41	35	3.53	131	15.25	58	10.39	112	11.72	182	24.42	139	18.04	124	17.41	69	14.41	138	15.47	116	13.68	124	13.97
8260	ARD1 homolog A, N-acetyltransferase (S. cerevisiae)	277	36.49	332	39.07	283	33.57	743	93.21	571	57.58	450	52.39	214	38.35	771	80.71	422	56.63	229	29.73	369	51.82	264	55.15	309	34.64	432	50.96	451	50.82
23338	PHD finger protein 15	81	10.67	69	8.12	84	9.96	172	21.58	45	4.54	122	14.2	81	14.51	50	5.23	223	29.93	133	17.27	114	16.01	120	25.07	160	17.94	141	16.63	155	17.47
158830	similar to Ab2-183	350	46.11	308	36.25	326	38.67	217	27.22	1935	195.13	548	63.8	219	39.24	1255	131.38	393	52.74	148	19.21	323	45.36	233	48.67	373	41.82	487	57.44	454	51.16
9834	KIAA0125	0	0	0	0	0	0	0	0	0	0	0	0	0	0	0	0	0	0	0	0	0	0	0	0	2	0.22	3	0.35	0	0
100131330	similar to Family with sequence similarity 139, member A	6	0.79	3	0.35	4	0.47	2	0.25	0	0	2	0.23	2	0.36	0	0	2	0.27	0	0	2	0.28	3	0.63	2	0.22	0	0	12	1.35
220359	tigger transposable element derived 3	18	2.37	34	4	53	6.29	110	13.8	67	6.76	28	3.26	43	7.71	83	8.69	29	3.89	20	2.6	27	3.79	25	5.22	43	4.82	35	4.13	87	9.8
57556	sema domain, transmembrane domain (TM), and cytoplasmic domain, (semaphorin) 6A	4	0.53	0	0	3	0.36	0	0	0	0	6	0.7	3	0.54	0	0	0	0	0	0	0	0	0	0	8	0.9	9	1.06	4	0.45
94030	leucine rich repeat containing 4B	0	0	0	0	0	0	7	0.88	0	0	0	0	0	0	0	0	0	0	0	0	0	0	0	0	0	0	0	0	0	0
57577	KIAA1407	22	2.9	29	3.41	48	5.69	58	7.28	79	7.97	22	2.56	19	3.4	81	8.48	41	5.5	33	4.28	31	4.35	32	6.68	51	5.72	69	8.14	67	7.55
25950	RWD domain containing 3	79	10.41	90	10.59	124	14.71	26	3.26	10	1.01	139	16.18	104	18.64	30	3.14	176	23.62	109	14.15	119	16.71	96	20.05	174	19.51	159	18.75	173	19.5
83439	transcription factor 7-like 1 (T-cell specific, HMG-box)	4	0.53	3	0.35	0	0	0	0	0	0	0	0	0	0	0	0	4	0.54	0	0	0	0	0	0	6	0.67	3	0.35	0	0
100129081	hypothetical protein LOC100129081	2	0.26	0	0	0	0	0	0	0	0	0	0	0	0	0	0	0	0	0	0	0	0	2	0.42	0	0	0	0	0	0
10097	ARP2 actin-related protein 2 homolog (yeast)	2041	268.87	4605	541.95	4950	587.16	1511	189.56	2652	267.43	5425	631.63	2716	486.68	2514	263.18	2818	378.17	2212	287.16	2274	319.33	1582	330.47	4848	543.53	3053	360.11	2515	283.42
131920	transmembrane protein 207	2	0.26	0	0	0	0	0	0	0	0	0	0	0	0	0	0	0	0	0	0	0	0	0	0	0	0	0	0	0	0
23129	plexin D1	45	5.93	53	6.24	65	7.71	92	11.54	211	21.28	145	16.88	62	11.11	334	34.96	224	30.06	106	13.76	173	24.29	176	36.76	123	13.79	127	14.98	177	19.95
8701	dynein, axonemal, heavy chain 11	10	1.32	4	0.47	2	0.24	0	0	0	0	3	0.35	8	1.43	0	0	8	1.07	5	0.65	0	0	6	1.25	0	0	4	0.47	14	1.58
5634	phosphoribosyl pyrophosphate synthetase 2	219	28.85	174	20.48	145	17.2	543	68.12	64	6.45	234	27.24	82	14.69	168	17.59	60	8.05	43	5.58	82	11.52	32	6.68	155	17.38	138	16.28	171	19.27
10577	Niemann-Pick disease, type C2	253	33.33	484	56.96	555	65.83	98	12.29	1578	159.13	738	85.93	548	98.2	1163	121.75	605	81.19	436	56.6	573	80.47	543	113.43	834	93.5	641	75.61	528	59.5
51816	cat eye syndrome chromosome region, candidate 1	342	45.05	378	44.49	264	31.32	220	27.6	621	62.62	643	74.86	348	62.36	903	94.53	717	96.22	606	78.67	662	92.96	694	144.97	818	91.71	708	83.51	645	72.69
9136	ribosomal RNA processing 9, small subunit (SSU) processome component, homolog (yeast)	8	1.05	5	0.59	2	0.24	17	2.13	19	1.92	9	1.05	5	0.9	52	5.44	12	1.61	15	1.95	14	1.97	11	2.3	9	1.01	22	2.59	8	0.9
191585	placenta-specific 4	3	0.4	0	0	0	0	2	0.25	12	1.21	0	0	2	0.36	2	0.21	3	0.4	2	0.26	0	0	4	0.84	0	0	0	0	2	0.23
93953	acidic repeat containing	52	6.85	69	8.12	79	9.37	105	13.17	56	5.65	70	8.15	25	4.48	23	2.41	76	10.2	56	7.27	36	5.06	25	5.22	96	10.76	66	7.78	70	7.89
22873	DAZ interacting protein 1	25	3.29	23	2.71	10	1.19	6	0.75	0	0	9	1.05	9	1.61	0	0	0	0	7	0.91	7	0.98	7	1.46	5	0.56	13	1.53	0	0
23673	syntaxin 12	126	16.6	217	25.54	264	31.32	153	19.19	280	28.24	214	24.92	129	23.12	304	31.82	317	42.54	224	29.08	260	36.51	178	37.18	257	28.81	257	30.31	267	30.09
120066	olfactory receptor, family 5, subfamily P, member 3	2	0.26	2	0.24	0	0	0	0	0	0	2	0.23	0	0	0	0	0	0	0	0	0	0	0	0	0	0	0	0	0	0
116832	ribosomal protein L39-like	9	1.19	13	1.53	5	0.59	0	0	11	1.11	9	1.05	6	1.08	64	6.7	5	0.67	3	0.39	9	1.26	3	0.63	15	1.68	9	1.06	16	1.8
645381	similar to transducin-like enhancer of split 1 (E(sp1) homolog, Drosophila)	0	0	0	0	0	0	0	0	11	1.11	0	0	0	0	19	1.99	0	0	0	0	0	0	0	0	0	0	0	0	0	0
2218	fukutin	65	8.56	19	2.24	42	4.98	104	13.05	47	4.74	42	4.89	22	3.94	37	3.87	68	9.13	28	3.63	31	4.35	24	5.01	104	11.66	63	7.43	56	6.31
65003	mitochondrial ribosomal protein L11	53	6.98	23	2.71	39	4.63	72	9.03	63	6.35	42	4.89	34	6.09	53	5.55	61	8.19	29	3.76	43	6.04	56	11.7	49	5.49	50	5.9	63	7.1
138046	RALY RNA binding protein-like	2	0.26	2	0.24	0	0	0	0	0	0	0	0	0	0	0	0	0	0	0	0	0	0	0	0	0	0	0	0	4	0.45
100127887	hypothetical protein LOC100127887	2	0.26	0	0	0	0	0	0	0	0	0	0	0	0	0	0	0	0	0	0	0	0	0	0	0	0	0	0	0	0
79009	DEAD (Asp-Glu-Ala-Asp) box polypeptide 50	61	8.04	44	5.18	44	5.22	39	4.89	192	19.36	57	6.64	49	8.78	183	19.16	223	29.93	136	17.66	120	16.85	110	22.98	113	12.67	135	15.92	170	19.16
3818	kallikrein B, plasma (Fletcher factor) 1	6	0.79	6	0.71	6	0.71	10	1.25	3	0.3	12	1.4	7	1.25	0	0	15	2.01	12	1.56	3	0.42	4	0.84	21	2.35	28	3.3	12	1.35
55530	SV2 related protein homolog (rat)	0	0	0	0	0	0	0	0	2	0.2	0	0	0	0	6	0.63	0	0	0	0	0	0	0	0	0	0	0	0	0	0
100133905	hypothetical protein LOC100133905	14	1.84	0	0	0	0	0	0	0	0	0	0	0	0	0	0	0	0	0	0	0	0	0	0	0	0	0	0	0	0
84335	AKT1 substrate 1 (proline-rich)	26	3.43	26	3.06	31	3.68	25	3.14	238	24	37	4.31	11	1.97	191	19.99	25	3.35	18	2.34	34	4.77	19	3.97	22	2.47	25	2.95	35	3.94
407738	family with sequence similarity 19 (chemokine (C-C motif)-like), member A1	40	5.27	12	1.41	17	2.02	66	8.28	61	6.15	39	4.54	8	1.43	96	10.05	36	4.83	26	3.38	32	4.49	20	4.18	3	0.34	37	4.36	52	5.86
100129870	hypothetical protein LOC100129870	329	43.34	339	39.9	143	16.96	65	8.15	0	0	398	46.34	103	18.46	0	0	251	33.68	105	13.63	159	22.33	107	22.35	242	27.13	281	33.14	189	21.3
11259	filamin A interacting protein 1-like	2	0.26	0	0	2	0.24	0	0	0	0	0	0	0	0	6	0.63	0	0	0	0	2	0.28	0	0	2	0.22	0	0	0	0
54956	poly (ADP-ribose) polymerase family, member 16	13	1.71	20	2.35	31	3.68	62	7.78	130	13.11	38	4.42	33	5.91	166	17.38	89	11.94	30	3.89	52	7.3	36	7.52	58	6.5	40	4.72	80	9.02
8444	dual-specificity tyrosine-(Y)-phosphorylation regulated kinase 3	0	0	4	0.47	0	0	0	0	0	0	2	0.23	0	0	0	0	0	0	4	0.52	2	0.28	0	0	0	0	4	0.47	0	0
128367	olfactory receptor, family 10, subfamily X, member 1	0	0	0	0	0	0	0	0	0	0	0	0	0	0	0	0	0	0	0	0	0	0	0	0	0	0	0	0	2	0.23
4222	mesenchyme homeobox 1	8	1.05	0	0	6	0.71	6	0.75	9	0.91	18	2.1	11	1.97	2	0.21	0	0	0	0	2	0.28	8	1.67	17	1.91	10	1.18	19	2.14
54621	hypothetical protein FLJ20674	6	0.79	8	0.94	3	0.36	14	1.76	16	1.61	7	0.82	6	1.08	23	2.41	6	0.81	2	0.26	5	0.7	3	0.63	8	0.9	2	0.24	0	0
29774	POM121-like protein	4	0.53	0	0	0	0	0	0	0	0	0	0	0	0	0	0	4	0.54	7	0.91	0	0	0	0	0	0	5	0.59	4	0.45
346562	guanine nucleotide binding protein, alpha transducing 3	2	0.26	0	0	0	0	0	0	0	0	0	0	0	0	0	0	0	0	0	0	0	0	0	0	0	0	0	0	0	0
91608	RAS-like, family 10, member B	0	0	0	0	0	0	0	0	0	0	0	0	0	0	0	0	0	0	0	0	0	0	0	0	3	0.34	0	0	0	0
57470	leucine rich repeat containing 47	102	13.44	85	10	101	11.98	107	13.42	367	37.01	90	10.48	92	16.49	849	88.88	200	26.84	101	13.11	123	17.27	77	16.08	169	18.95	117	13.8	127	14.31
1621	dopamine beta-hydroxylase (dopamine beta-monooxygenase)	0	0	0	0	0	0	5	0.63	0	0	0	0	0	0	0	0	0	0	0	0	0	0	0	0	0	0	0	0	0	0
8804	cellular repressor of E1A-stimulated genes 1	126	16.6	239	28.13	267	31.67	465	58.34	406	40.94	303	35.28	138	24.73	698	73.07	387	51.93	416	54	336	47.18	226	47.21	303	33.97	314	37.04	307	34.6
10752	cell adhesion molecule with homology to L1CAM (close homolog of L1)	0	0	0	0	0	0	0	0	0	0	0	0	0	0	6	0.63	2	0.27	0	0	0	0	0	0	0	0	0	0	0	0
283927	nudix (nucleoside diphosphate linked moiety X)-type motif 7	83	10.93	52	6.12	31	3.68	148	18.57	2	0.2	81	9.43	24	4.3	0	0	39	5.23	22	2.86	30	4.21	26	5.43	35	3.92	36	4.25	74	8.34
403341	zinc finger and BTB domain containing 34	151	19.89	474	55.78	684	81.14	152	19.07	440	44.37	392	45.64	288	51.61	253	26.49	255	34.22	220	28.56	291	40.86	150	31.33	454	50.9	437	51.55	370	41.7
84284	chromosome 1 open reading frame 57	0	0	0	0	0	0	0	0	135	13.61	0	0	0	0	97	10.15	0	0	0	0	0	0	0	0	0	0	0	0	0	0
390963	zinc finger protein 818 pseudogene	0	0	0	0	2	0.24	0	0	8	0.81	3	0.35	0	0	0	0	0	0	0	0	2	0.28	0	0	0	0	0	0	0	0
6468	F-box and WD repeat domain containing 4	245	32.28	261	30.72	249	29.54	148	18.57	60	6.05	373	43.43	241	43.18	78	8.17	361	48.44	270	35.05	268	37.63	175	36.56	504	56.51	299	35.27	388	43.72
2304	forkhead box E1 (thyroid transcription factor 2)	0	0	0	0	0	0	5	0.63	0	0	0	0	0	0	0	0	0	0	0	0	0	0	0	0	0	0	0	0	0	0
84437	KIAA1826	24	3.16	17	2	26	3.08	110	13.8	27	2.72	14	1.63	21	3.76	46	4.82	28	3.76	31	4.02	19	2.67	16	3.34	26	2.91	26	3.07	52	5.86
100134016	hypothetical protein LOC100134016	0	0	0	0	0	0	0	0	2	0.2	0	0	0	0	0	0	0	0	0	0	0	0	0	0	0	0	0	0	0	0
55521	tripartite motif-containing 36	0	0	0	0	0	0	0	0	0	0	0	0	2	0.36	22	2.3	7	0.94	2	0.26	6	0.84	10	2.09	11	1.23	10	1.18	11	1.24
27141	cell death-inducing DFFA-like effector b	73	9.62	167	19.65	168	19.93	211	26.47	861	86.82	236	27.48	122	21.86	866	90.66	193	25.9	143	18.56	157	22.05	134	27.99	98	10.99	165	19.46	124	13.97
51385	zinc finger protein 589	27	3.56	34	4	18	2.14	3	0.38	71	7.16	70	8.15	32	5.73	135	14.13	50	6.71	28	3.63	43	6.04	33	6.89	42	4.71	47	5.54	36	4.06
1774	deoxyribonuclease I-like 1	81	10.67	174	20.48	142	16.84	21	2.63	72	7.26	219	25.5	157	28.13	64	6.7	145	19.46	134	17.4	89	12.5	62	12.95	223	25	159	18.75	152	17.13
728672	similar to hCG2043493	0	0	0	0	0	0	0	0	0	0	2	0.23	0	0	0	0	9	1.21	9	1.17	4	0.56	11	2.3	7	0.78	7	0.83	2	0.23
134637	adenosine deaminase, tRNA-specific 2, TAD2 homolog (S. cerevisiae)	73	9.62	48	5.65	48	5.69	95	11.92	49	4.94	82	9.55	37	6.63	92	9.63	112	15.03	83	10.77	91	12.78	46	9.61	135	15.14	75	8.85	122	13.75
1060	centromere protein C 1	297	39.13	189	22.24	197	23.37	177	22.21	243	24.5	376	43.78	206	36.91	176	18.42	531	71.26	300	38.95	294	41.29	338	70.61	248	27.8	389	45.88	360	40.57
56624	N-acylsphingosine amidohydrolase (non-lysosomal ceramidase) 2	0	0	0	0	0	0	2	0.25	0	0	0	0	0	0	0	0	0	0	0	0	0	0	0	0	0	0	0	0	0	0
732437	similar to general transcription factor II, i isoform 1	204	26.87	206	24.24	352	41.75	627	78.66	116	11.7	199	23.17	176	31.54	136	14.24	91	12.21	73	9.48	128	17.97	58	12.12	175	19.62	145	17.1	308	34.71
128346	chromosome 1 open reading frame 162	456	60.07	697	82.03	767	90.98	1054	132.23	882	88.94	1301	151.48	731	130.99	1577	165.09	1100	147.62	730	94.77	994	139.59	827	172.75	1026	115.03	921	108.63	1040	117.2
121441	neural precursor cell expressed, developmentally down-regulated 1	0	0	4	0.47	3	0.36	0	0	0	0	5	0.58	2	0.36	0	0	21	2.82	8	1.04	15	2.11	4	0.84	8	0.9	21	2.48	6	0.68
80830	apolipoprotein L, 6	330	43.47	277	32.6	334	39.62	440	55.2	892	89.95	420	48.9	271	48.56	967	101.23	802	107.63	385	49.98	458	64.32	484	101.1	407	45.63	440	51.9	385	43.39
80201	hexokinase domain containing 1	9	1.19	4	0.47	6	0.71	11	1.38	2	0.2	6	0.7	6	1.08	22	2.3	8	1.07	7	0.91	7	0.98	4	0.84	8	0.9	7	0.83	5	0.56
23475	quinolinate phosphoribosyltransferase	3	0.4	0	0	0	0	5	0.63	0	0	4	0.47	3	0.54	0	0	0	0	0	0	0	0	2	0.42	2	0.22	0	0	7	0.79
222068	transmembrane emp24 protein transport domain containing 4	9	1.19	25	2.94	15	1.78	12	1.51	29	2.92	28	3.26	20	3.58	42	4.4	51	6.84	38	4.93	31	4.35	29	6.06	36	4.04	42	4.95	46	5.18
283219	potassium channel tetramerisation domain containing 21	27	3.56	59	6.94	71	8.42	16	2.01	302	30.45	50	5.82	40	7.17	439	45.96	40	5.37	36	4.67	27	3.79	34	7.1	39	4.37	40	4.72	57	6.42
5034	procollagen-proline, 2-oxoglutarate 4-dioxygenase (proline 4-hydroxylase), beta polypeptide	267	35.17	307	36.13	312	37.01	351	44.03	0	0	387	45.06	190	34.05	0	0	374	50.19	211	27.39	265	37.21	276	57.65	345	38.68	345	40.69	433	48.8
10761	placenta-specific 1	2	0.26	0	0	0	0	0	0	0	0	0	0	0	0	0	0	0	0	0	0	0	0	0	0	0	0	0	0	0	0
729467	hypothetical protein LOC729467	4	0.53	0	0	0	0	0	0	0	0	0	0	0	0	0	0	0	0	0	0	0	0	0	0	0	0	0	0	0	0
10193	ring finger protein 41	47	6.19	92	10.83	113	13.4	114	14.3	81	8.17	126	14.67	87	15.59	87	9.11	195	26.17	97	12.59	139	19.52	101	21.1	129	14.46	99	11.68	118	13.3
2135	exostoses (multiple)-like 2	14	1.84	16	1.88	12	1.42	17	2.13	0	0	14	1.63	9	1.61	0	0	32	4.29	14	1.82	22	3.09	21	4.39	16	1.79	27	3.18	71	8
83987	coiled-coil domain containing 8	58	7.64	2	0.24	0	0	10	1.25	24	2.42	0	0	0	0	31	3.25	2	0.27	0	0	3	0.42	8	1.67	2	0.22	0	0	15	1.69
5111	proliferating cell nuclear antigen	74	9.75	58	6.83	80	9.49	362	45.41	232	23.4	71	8.27	41	7.35	498	52.13	77	10.33	61	7.92	49	6.88	70	14.62	54	6.05	60	7.08	113	12.73
10321	cysteine-rich secretory protein 3	9	1.19	8	0.94	9	1.07	0	0	151	15.23	10	1.16	0	0	28	2.93	12	1.61	9	1.17	5	0.7	4	0.84	19	2.13	8	0.94	0	0
100130729	hypothetical protein LOC100130729	158	20.81	25	2.94	25	2.97	32	4.01	6	0.61	38	4.42	11	1.97	4	0.42	26	3.49	31	4.02	17	2.39	42	8.77	21	2.35	31	3.66	68	7.66
91179	scavenger receptor class F, member 2	0	0	0	0	4	0.47	0	0	0	0	0	0	0	0	10	1.05	0	0	2	0.26	3	0.42	0	0	0	0	0	0	0	0
100132764	hypothetical LOC100132764	0	0	0	0	0	0	0	0	0	0	0	0	0	0	0	0	0	0	0	0	0	0	0	0	4	0.45	0	0	0	0
100130598	hypothetical protein LOC100130598	99	13.04	15	1.77	17	2.02	8	1	5	0.5	37	4.31	13	2.33	110	11.52	31	4.16	15	1.95	10	1.4	26	5.43	12	1.35	28	3.3	22	2.48
26086	G-protein signaling modulator 1 (AGS3-like, C. elegans)	0	0	0	0	0	0	2	0.25	0	0	0	0	0	0	0	0	0	0	0	0	0	0	0	0	0	0	0	0	0	0
79728	partner and localizer of BRCA2	25	3.29	10	1.18	17	2.02	14	1.76	11	1.11	46	5.36	9	1.61	0	0	46	6.17	29	3.76	25	3.51	13	2.72	40	4.48	54	6.37	42	4.73
492	ATPase, Ca++ transporting, plasma membrane 3	48	6.32	10	1.18	7	0.83	39	4.89	0	0	34	3.96	57	10.21	0	0	25	3.35	12	1.56	11	1.54	2	0.42	20	2.24	21	2.48	23	2.59
100128157	similar to hCG2041134	0	0	0	0	0	0	0	0	0	0	0	0	0	0	0	0	0	0	0	0	0	0	0	0	3	0.34	0	0	0	0
22895	rabphilin 3A homolog (mouse)	0	0	0	0	0	0	0	0	0	0	0	0	0	0	4	0.42	0	0	0	0	0	0	0	0	0	0	0	0	0	0
730262	similar to Peptidylprolyl isomerase A (cyclophilin A)-like 4	0	0	0	0	2	0.24	0	0	0	0	2	0.23	0	0	0	0	0	0	0	0	2	0.28	0	0	0	0	0	0	2	0.23
57619	shroom family member 3	7	0.92	0	0	0	0	0	0	0	0	0	0	0	0	0	0	4	0.54	0	0	2	0.28	0	0	0	0	2	0.24	4	0.45
5603	mitogen-activated protein kinase 13	43	5.66	108	12.71	196	23.25	159	19.95	318	32.07	87	10.13	103	18.46	330	34.55	77	10.33	54	7.01	155	21.77	48	10.03	98	10.99	84	9.91	76	8.56
54464	5'-3' exoribonuclease 1	908	119.62	915	107.68	957	113.52	647	81.17	394	39.73	984	114.57	921	165.03	572	59.88	841	112.86	663	86.07	804	112.9	744	155.42	1054	118.17	930	109.7	969	109.2
1147	conserved helix-loop-helix ubiquitous kinase	68	8.96	166	19.54	207	24.55	40	5.02	245	24.71	145	16.88	107	19.17	77	8.06	206	27.64	160	20.77	154	21.63	96	20.05	166	18.61	159	18.75	133	14.99
143689	piwi-like 4 (Drosophila)	4	0.53	6	0.71	6	0.71	11	1.38	8	0.81	5	0.58	4	0.72	8	0.84	7	0.94	2	0.26	8	1.12	6	1.25	8	0.9	14	1.65	20	2.25
909	CD1a molecule	6	0.79	8	0.94	9	1.07	0	0	4	0.4	6	0.7	11	1.97	15	1.57	2	0.27	3	0.39	2	0.28	2	0.42	8	0.9	9	1.06	0	0
51096	UTP18, small subunit (SSU) processome component, homolog (yeast)	44	5.8	175	20.6	101	11.98	21	2.63	367	37.01	333	38.77	90	16.13	694	72.65	111	14.9	111	14.41	83	11.66	80	16.71	269	30.16	144	16.99	106	11.95
79871	RNA polymerase II associated protein 2	52	6.85	44	5.18	29	3.44	86	10.79	21	2.12	57	6.64	29	5.2	29	3.04	98	13.15	72	9.35	76	10.67	55	11.49	73	8.18	47	5.54	110	12.4
729178	hypothetical protein LOC729178	0	0	0	0	3	0.36	0	0	0	0	0	0	0	0	0	0	0	0	0	0	0	0	0	0	0	0	0	0	0	0
339448	chromosome 1 open reading frame 174	154	20.29	171	20.12	154	18.27	223	27.98	101	10.18	263	30.62	122	21.86	226	23.66	281	37.71	169	21.94	159	22.33	116	24.23	198	22.2	165	19.46	275	30.99
7353	ubiquitin fusion degradation 1 like (yeast)	101	13.31	229	26.95	220	26.1	20	2.51	298	30.05	192	22.35	172	30.82	444	46.48	192	25.77	178	23.11	160	22.47	110	22.98	228	25.56	215	25.36	158	17.81
55647	RAB20, member RAS oncogene family	61	8.04	309	36.37	340	40.33	95	11.92	128	12.91	124	14.44	101	18.1	98	10.26	48	6.44	37	4.8	40	5.62	23	4.8	118	13.23	66	7.78	64	7.21
8615	USO1 homolog, vesicle docking protein (yeast)	150	19.76	196	23.07	223	26.45	153	19.19	92	9.28	212	24.68	130	23.29	59	6.18	292	39.19	232	30.12	193	27.1	140	29.24	219	24.55	232	27.37	199	22.43
375387	leucine rich repeat containing 33	38	5.01	40	4.71	42	4.98	113	14.18	198	19.97	87	10.13	38	6.81	163	17.06	140	18.79	99	12.85	122	17.13	132	27.57	109	12.22	93	10.97	77	8.68
56929	fem-1 homolog c (C. elegans)	108	14.23	230	27.07	212	25.15	122	15.31	260	26.22	219	25.5	106	18.99	97	10.15	129	17.31	71	9.22	142	19.94	102	21.31	172	19.28	137	16.16	185	20.85
220388	coiled-coil domain containing 89	0	0	0	0	0	0	0	0	0	0	0	0	0	0	4	0.42	0	0	3	0.39	0	0	0	0	3	0.34	0	0	0	0
100130201	hypothetical LOC100130201	2	0.26	0	0	0	0	0	0	0	0	0	0	0	0	0	0	0	0	0	0	0	0	0	0	0	0	0	0	0	0
3174	hepatocyte nuclear factor 4, gamma	2	0.26	0	0	0	0	0	0	0	0	0	0	0	0	0	0	0	0	0	0	0	0	0	0	0	0	2	0.24	0	0
84326	chromosome 16 open reading frame 13	38	5.01	82	9.65	34	4.03	23	2.89	332	33.48	93	10.83	49	8.78	564	59.04	104	13.96	69	8.96	54	7.58	61	12.74	111	12.44	92	10.85	96	10.82
6892	TAP binding protein (tapasin)	1083	142.67	1852	217.96	2115	250.88	1674	210.01	4945	498.66	1895	220.64	1094	196.03	7114	744.73	1424	191.1	1045	135.66	1532	215.14	1282	267.8	1623	181.96	1846	217.74	1642	185.04
646090	hypothetical LOC646090	2	0.26	0	0	0	0	0	0	0	0	0	0	0	0	0	0	0	0	0	0	0	0	0	0	0	0	0	0	0	0
26511	cysteine-rich hydrophobic domain 2	60	7.9	203	23.89	265	31.43	37	4.64	300	30.25	190	22.12	142	25.45	235	24.6	144	19.32	153	19.86	122	17.13	70	14.62	200	22.42	182	21.47	84	9.47
125950	ribonucleoprotein, PTB-binding 1	119	15.68	285	33.54	339	40.21	230	28.85	306	30.86	331	38.54	170	30.46	485	50.77	191	25.63	125	16.23	256	35.95	151	31.54	172	19.28	248	29.25	212	23.89
38	acetyl-Coenzyme A acetyltransferase 1	57	7.51	63	7.41	73	8.66	142	17.81	13	1.31	80	9.31	59	10.57	79	8.27	185	24.83	124	16.1	113	15.87	86	17.96	100	11.21	114	13.45	148	16.68
55051	chromosome 14 open reading frame 102	23	3.03	43	5.06	48	5.69	28	3.51	32	3.23	43	5.01	24	4.3	45	4.71	32	4.29	28	3.63	11	1.54	24	5.01	16	1.79	25	2.95	23	2.59
8535	chromobox homolog 4 (Pc class homolog, Drosophila)	435	57.31	1242	146.17	759	90.03	438	54.95	904	91.16	2284	265.93	1154	206.79	531	55.59	1836	246.38	941	122.16	1318	185.08	1131	236.26	1440	161.44	1517	178.93	1182	133.2
6674	sperm associated antigen 1	28	3.69	147	17.3	88	10.44	28	3.51	43	4.34	113	13.16	60	10.75	27	2.83	48	6.44	53	6.88	63	8.85	40	8.36	114	12.78	68	8.02	77	8.68
3972	luteinizing hormone beta polypeptide	0	0	0	0	2	0.24	0	0	0	0	0	0	0	0	0	0	2	0.27	0	0	0	0	0	0	0	0	0	0	0	0
902	cyclin H	78	10.28	117	13.77	125	14.83	38	4.77	112	11.29	145	16.88	93	16.66	156	16.33	146	19.59	156	20.25	104	14.6	106	22.14	108	12.11	163	19.23	184	20.74
154865	IQ motif and ubiquitin domain containing	0	0	0	0	0	0	4	0.5	6	0.61	3	0.35	0	0	2	0.21	2	0.27	2	0.26	0	0	0	0	0	0	0	0	9	1.01
27202	G protein-coupled receptor 77	4	0.53	21	2.47	33	3.91	11	1.38	0	0	20	2.33	17	3.05	10	1.05	28	3.76	13	1.69	24	3.37	10	2.09	33	3.7	21	2.48	47	5.3
23636	nucleoporin 62kDa	86	11.33	90	10.59	98	11.62	170	21.33	82	8.27	126	14.67	72	12.9	67	7.01	139	18.65	121	15.71	127	17.83	85	17.76	183	20.52	150	17.69	216	24.34
100128090	hypothetical protein LOC100128090	0	0	0	0	0	0	0	0	0	0	0	0	0	0	0	0	0	0	0	0	0	0	0	0	4	0.45	0	0	0	0
11163	nudix (nucleoside diphosphate linked moiety X)-type motif 4	188	24.77	250	29.42	265	31.43	202	25.34	99	9.98	334	38.89	160	28.67	72	7.54	333	44.69	248	32.19	196	27.52	151	31.54	369	41.37	302	35.62	318	35.84
100128647	similar to Putative ubiquitin-conjugating enzyme E2 D3-like protein	0	0	0	0	0	0	0	0	2	0.2	0	0	0	0	2	0.21	0	0	0	0	0	0	0	0	0	0	0	0	0	0
96610	hypothetical gene LOC96610	59	7.77	42	4.94	50	5.93	22	2.76	37	3.73	42	4.89	14	2.51	107	11.2	57	7.65	32	4.15	21	2.95	39	8.15	66	7.4	49	5.78	64	7.21
79718	transducin (beta)-like 1 X-linked receptor 1	340	44.79	454	53.43	666	79	344	43.16	954	96.2	405	47.15	425	76.16	1666	174.4	601	80.65	454	58.94	427	59.96	398	83.14	509	57.07	549	64.76	768	86.55
28959	transmembrane protein 176B	113	14.89	106	12.47	145	17.2	329	41.27	1380	139.16	451	52.51	242	43.36	2090	218.79	251	33.68	195	25.31	261	36.65	282	58.91	54	6.05	50	5.9	55	6.2
9776	KIAA0652	285	37.54	493	58.02	484	57.41	897	112.53	330	33.28	674	78.47	382	68.45	552	57.79	680	91.25	447	58.03	578	81.17	421	87.94	554	62.11	575	67.82	692	77.98
131540	zinc finger, DHHC-type containing 19	0	0	2	0.24	2	0.24	3	0.38	12	1.21	5	0.58	2	0.36	2	0.21	2	0.27	3	0.39	5	0.7	2	0.42	6	0.67	2	0.24	3	0.34
54962	TIMELESS interacting protein	11	1.45	3	0.35	3	0.36	2	0.25	16	1.61	2	0.23	0	0	8	0.84	6	0.81	4	0.52	8	1.12	3	0.63	14	1.57	4	0.47	20	2.25
146429	hypothetical protein LOC146429	0	0	0	0	0	0	0	0	0	0	2	0.23	0	0	0	0	0	0	0	0	0	0	0	0	0	0	5	0.59	0	0
6722	serum response factor (c-fos serum response element-binding transcription factor)	361	47.56	556	65.43	538	63.82	277	34.75	71	7.16	992	115.5	244	43.72	37	3.87	413	55.42	263	34.14	373	52.38	210	43.87	729	81.73	543	64.05	359	40.46
100133813	similar to hCG1820519	0	0	0	0	0	0	2	0.25	0	0	0	0	0	0	0	0	11	1.48	0	0	6	0.84	4	0.84	3	0.34	2	0.24	8	0.9
8890	eukaryotic translation initiation factor 2B, subunit 4 delta, 67kDa	40	5.27	93	10.94	68	8.07	25	3.14	308	31.06	120	13.97	50	8.96	444	46.48	100	13.42	87	11.29	57	8	76	15.88	105	11.77	94	11.09	70	7.89
100130924	hypothetical LOC100130924	0	0	0	0	0	0	0	0	0	0	0	0	0	0	0	0	0	0	0	0	0	0	0	0	0	0	0	0	2	0.23
79796	asparagine-linked glycosylation 9 homolog (S. cerevisiae, alpha- 1,2-mannosyltransferase)	39	5.14	15	1.77	17	2.02	14	1.76	62	6.25	28	3.26	20	3.58	86	9	35	4.7	39	5.06	38	5.34	31	6.48	40	4.48	21	2.48	44	4.96
100128844	hypothetical protein LOC100128844	0	0	0	0	0	0	4	0.5	0	0	0	0	0	0	0	0	0	0	0	0	0	0	0	0	0	0	0	0	0	0
1089	carcinoembryonic antigen-related cell adhesion molecule 4	2	0.26	26	3.06	22	2.61	3	0.38	1496	150.86	49	5.71	53	9.5	2044	213.98	40	5.37	56	7.27	49	6.88	18	3.76	35	3.92	32	3.77	34	3.83
401149	hypothetical gene supported by AK024248; AL137733	0	0	0	0	0	0	0	0	3	0.3	0	0	0	0	2	0.21	0	0	0	0	0	0	0	0	0	0	5	0.59	0	0
7268	tetratricopeptide repeat domain 4	30	3.95	30	3.53	30	3.56	11	1.38	12	1.21	42	4.89	19	3.4	61	6.39	34	4.56	25	3.25	19	2.67	25	5.22	62	6.95	29	3.42	18	2.03
100131544	similar to zinc finger, NFX1-type containing 1	0	0	0	0	0	0	0	0	3	0.3	0	0	0	0	0	0	0	0	0	0	0	0	0	0	0	0	0	0	0	0
80345	zinc finger and SCAN domain containing 16	3	0.4	11	1.29	23	2.73	27	3.39	79	7.97	10	1.16	4	0.72	192	20.1	9	1.21	5	0.65	5	0.7	0	0	7	0.78	18	2.12	26	2.93
53828	FXYD domain containing ion transport regulator 4	0	0	0	0	0	0	0	0	0	0	0	0	0	0	2	0.21	0	0	0	0	0	0	0	0	0	0	0	0	0	0
81620	chromatin licensing and DNA replication factor 1	3	0.4	4	0.47	0	0	0	0	12	1.21	3	0.35	2	0.36	14	1.47	5	0.67	4	0.52	0	0	0	0	10	1.12	3	0.35	5	0.56
51135	interleukin-1 receptor-associated kinase 4	29	3.82	54	6.36	65	7.71	100	12.55	24	2.42	68	7.92	59	10.57	48	5.02	116	15.57	78	10.13	93	13.06	53	11.07	78	8.74	77	9.08	39	4.39
94104	chromosome 21 open reading frame 66	154	20.29	176	20.71	203	24.08	371	46.54	817	82.39	224	26.08	130	23.29	674	70.56	223	29.93	194	25.18	214	30.05	137	28.62	268	30.05	296	34.91	311	35.05
100132133	hypothetical protein LOC100132133	0	0	0	0	0	0	0	0	0	0	0	0	0	0	0	0	0	0	0	0	0	0	0	0	0	0	0	0	2	0.23
9904	RNA binding motif protein 19	5	0.66	2	0.24	3	0.36	14	1.76	3	0.3	0	0	0	0	21	2.2	17	2.28	17	2.21	16	2.25	13	2.72	12	1.35	23	2.71	5	0.56
9928	kinesin family member 14	15	1.98	2	0.24	0	0	14	1.76	30	3.03	3	0.35	0	0	25	2.62	17	2.28	4	0.52	5	0.7	0	0	8	0.9	4	0.47	0	0
1544	cytochrome P450, family 1, subfamily A, polypeptide 2	23	3.03	3	0.35	0	0	0	0	50	5.04	3	0.35	0	0	49	5.13	5	0.67	2	0.26	0	0	5	1.04	0	0	3	0.35	20	2.25
55706	transmembrane protein 48	15	1.98	5	0.59	12	1.42	24	3.01	23	2.32	13	1.51	7	1.25	64	6.7	12	1.61	6	0.78	17	2.39	8	1.67	19	2.13	12	1.42	22	2.48
1572	cytochrome P450, family 2, subfamily F, polypeptide 1	0	0	0	0	0	0	0	0	0	0	2	0.23	0	0	0	0	2	0.27	0	0	0	0	0	0	0	0	2	0.24	0	0
79042	tRNA splicing endonuclease 34 homolog (S. cerevisiae)	0	0	0	0	0	0	0	0	654	65.95	0	0	0	0	414	43.34	0	0	0	0	0	0	0	0	0	0	0	0	0	0
100129169	hypothetical protein LOC100129169	2	0.26	0	0	3	0.36	0	0	0	0	7	0.82	2	0.36	0	0	13	1.74	2	0.26	4	0.56	5	1.04	8	0.9	7	0.83	0	0
643162	hypothetical LOC643162	71	9.35	7	0.82	9	1.07	4	0.5	16	1.61	12	1.4	7	1.25	16	1.67	25	3.35	12	1.56	5	0.7	18	3.76	10	1.12	28	3.3	22	2.48
222487	G protein-coupled receptor 97	112	14.75	419	49.31	486	57.65	698	87.57	983	99.13	328	38.19	225	40.32	620	64.9	129	17.31	123	15.97	210	29.49	107	22.35	160	17.94	198	23.35	187	21.07
51351	zinc finger protein 117	608	80.1	605	71.2	665	78.88	287	36.01	499	50.32	601	69.97	370	66.3	304	31.82	375	50.32	292	37.91	469	65.86	267	55.77	464	52.02	509	60.04	600	67.62
9103	Fc fragment of IgG, low affinity IIc, receptor for (CD32)	32	4.22	53	6.24	64	7.59	18	2.26	0	0	85	9.9	40	7.17	0	0	81	10.87	30	3.89	56	7.86	43	8.98	57	6.39	27	3.18	34	3.83
22835	zinc finger protein 30 homolog (mouse)	6	0.79	5	0.59	4	0.47	0	0	9	0.91	3	0.35	0	0	12	1.26	2	0.27	0	0	0	0	2	0.42	12	1.35	5	0.59	10	1.13
8792	tumor necrosis factor receptor superfamily, member 11a, NFKB activator	7	0.92	0	0	0	0	5	0.63	0	0	2	0.23	0	0	4	0.42	2	0.27	2	0.26	0	0	0	0	5	0.56	5	0.59	0	0
23008	kelch domain containing 10	4	0.53	8	0.94	4	0.47	10	1.25	0	0	11	1.28	0	0	12	1.26	18	2.42	19	2.47	15	2.11	17	3.55	15	1.68	5	0.59	9	1.01
131408	family with sequence similarity 131, member A	27	3.56	43	5.06	67	7.95	39	4.89	104	10.49	41	4.77	31	5.55	103	10.78	57	7.65	27	3.51	44	6.18	43	8.98	71	7.96	54	6.37	43	4.85
440991	similar to 40S ribosomal protein S3	2	0.26	0	0	0	0	0	0	0	0	2	0.23	0	0	0	0	0	0	0	0	0	0	0	0	9	1.01	0	0	4	0.45
10049	DnaJ (Hsp40) homolog, subfamily B, member 6	201	26.48	552	64.96	590	69.99	146	18.32	146	14.72	506	58.91	331	59.31	162	16.96	547	73.41	391	50.76	452	63.47	300	62.67	501	56.17	628	74.07	573	64.57
5638	proline rich Gla (G-carboxyglutamic acid) 1	0	0	0	0	0	0	0	0	0	0	3	0.35	0	0	0	0	0	0	3	0.39	2	0.28	0	0	0	0	0	0	0	0
7499	Xg blood group	0	0	2	0.24	2	0.24	0	0	0	0	0	0	0	0	0	0	0	0	0	0	0	0	0	0	0	0	0	0	0	0
27010	thiamin pyrophosphokinase 1	14	1.84	63	7.41	38	4.51	3	0.38	7	0.71	27	3.14	32	5.73	10	1.05	44	5.9	40	5.19	40	5.62	36	7.52	47	5.27	47	5.54	26	2.93
51596	cutA divalent cation tolerance homolog (E. coli)	109	14.36	153	18.01	170	20.17	73	9.16	611	61.61	246	28.64	136	24.37	1050	109.92	238	31.94	152	19.73	212	29.77	155	32.38	294	32.96	212	25.01	197	22.2
64780	microtubule associated monoxygenase, calponin and LIM domain containing 1	586	77.2	787	92.62	1476	175.08	1503	188.56	1084	109.31	681	79.29	518	92.82	1166	122.06	604	81.05	314	40.76	703	98.72	339	70.81	635	71.19	739	87.17	814	91.73
23551	RASD family, member 2	4	0.53	0	0	5	0.59	8	1	0	0	0	0	0	0	0	0	0	0	0	0	0	0	0	0	0	0	0	0	0	0
55008	hect domain and RLD 6	26	3.43	23	2.71	20	2.37	33	4.14	102	10.29	19	2.21	14	2.51	96	10.05	77	10.33	30	3.89	55	7.72	47	9.82	28	3.14	32	3.77	51	5.75
1903	sphingosine-1-phosphate receptor 3	17	2.24	17	2	19	2.25	0	0	134	13.51	26	3.03	13	2.33	243	25.44	15	2.01	21	2.73	20	2.81	13	2.72	37	4.15	34	4.01	6	0.68
1794	dedicator of cytokinesis 2	240	31.62	636	74.85	855	101.42	353	44.29	1011	101.95	663	77.19	498	89.24	753	78.83	906	121.58	798	103.59	964	135.37	675	141	847	94.96	912	107.57	792	89.25
7167	triosephosphate isomerase 1	232	30.56	557	65.55	349	41.4	35	4.39	16	1.61	661	76.96	359	64.33	28	2.93	353	47.37	305	39.59	339	47.61	248	51.81	57	6.39	113	13.33	52	5.86
100128245	similar to hCG2033209	3	0.4	41	4.83	24	2.85	8	1	0	0	39	4.54	17	3.05	0	0	12	1.61	9	1.17	24	3.37	6	1.25	33	3.7	49	5.78	42	4.73
374882	transmembrane protein 205	260	34.25	269	31.66	245	29.06	734	92.08	93	9.38	401	46.69	229	41.03	204	21.36	257	34.49	214	27.78	236	33.14	170	35.51	396	44.4	257	30.31	372	41.92
58506	SR-related CTD-associated factor 1	76	10.01	45	5.3	75	8.9	185	23.21	296	29.85	77	8.97	46	8.24	297	31.09	50	6.71	27	3.51	47	6.6	21	4.39	58	6.5	58	6.84	39	4.39
92840	receptor accessory protein 6	0	0	0	0	0	0	2	0.25	3	0.3	2	0.23	0	0	13	1.36	2	0.27	0	0	2	0.28	2	0.42	4	0.45	4	0.47	0	0
200010	solute carrier family 5 (sodium/glucose cotransporter), member 9	0	0	4	0.47	8	0.95	0	0	22	2.22	7	0.82	11	1.97	4	0.42	5	0.67	3	0.39	3	0.42	4	0.84	0	0	4	0.47	7	0.79
57658	calcium binding and coiled-coil domain 1	497	65.47	906	106.62	1198	142.11	380	47.67	219	22.08	904	105.25	791	141.74	310	32.45	975	130.84	656	85.16	738	103.64	426	88.99	904	101.35	834	98.37	895	100.86
1620	deleted in bladder cancer 1	0	0	0	0	0	0	0	0	0	0	0	0	0	0	0	0	2	0.27	0	0	0	0	0	0	0	0	0	0	0	0
23428	solute carrier family 7 (cationic amino acid transporter, y+ system), member 8	7	0.92	6	0.71	5	0.59	0	0	4	0.4	33	3.84	12	2.15	10	1.05	5	0.67	2	0.26	5	0.7	3	0.63	10	1.12	24	2.83	5	0.56
641298	PI-3-kinase-related kinase SMG-1	0	0	0	0	0	0	4	0.5	0	0	0	0	0	0	0	0	0	0	2	0.26	0	0	0	0	0	0	0	0	0	0
6729	signal recognition particle 54kDa	172	22.66	309	36.37	318	37.72	144	18.07	282	28.44	301	35.05	144	25.8	330	34.55	354	47.51	250	32.45	260	36.51	190	39.69	330	37	336	39.63	291	32.79
84316	LSM domain containing 1	45	5.93	93	10.94	129	15.3	159	19.95	36	3.63	110	12.81	86	15.41	31	3.25	265	35.56	200	25.96	177	24.86	148	30.92	191	21.41	179	21.11	215	24.23
2906	glutamate receptor, ionotropic, N-methyl D-aspartate 2D	0	0	0	0	0	0	0	0	0	0	0	0	0	0	4	0.42	0	0	0	0	0	0	2	0.42	4	0.45	0	0	0	0
100132390	hypothetical protein LOC100132390	0	0	3	0.35	0	0	0	0	0	0	0	0	0	0	0	0	0	0	0	0	0	0	0	0	0	0	2	0.24	0	0
51002	TP53RK binding protein	50	6.59	58	6.83	51	6.05	106	13.3	106	10.69	45	5.24	30	5.38	139	14.55	39	5.23	19	2.47	29	4.07	22	4.6	46	5.16	54	6.37	47	5.3
677844	small nucleolar RNA, H/ACA box 78	0	0	10	1.18	22	2.61	0	0	0	0	8	0.93	13	2.33	0	0	15	2.01	4	0.52	8	1.12	14	2.92	4	0.45	13	1.53	6	0.68
100131860	hypothetical protein LOC100131860	0	0	0	0	0	0	0	0	4	0.4	0	0	0	0	0	0	0	0	0	0	2	0.28	0	0	0	0	0	0	0	0
51013	exosome component 1	91	11.99	114	13.42	109	12.93	28	3.51	99	9.98	150	17.46	62	11.11	106	11.1	137	18.38	103	13.37	109	15.31	89	18.59	158	17.71	104	12.27	83	9.35
5018	oxidase (cytochrome c) assembly 1-like	142	18.71	173	20.36	231	27.4	189	23.71	34	3.43	222	25.85	137	24.55	23	2.41	481	64.55	280	36.35	385	54.06	235	49.09	271	30.38	350	41.28	371	41.81
150368	family with sequence similarity 109, member B	54	7.11	29	3.41	29	3.44	29	3.64	16	1.61	66	7.68	45	8.06	5	0.52	33	4.43	19	2.47	39	5.48	54	11.28	58	6.5	61	7.2	14	1.58
4950	occludin	13	1.71	17	2	10	1.19	23	2.89	189	19.06	48	5.59	32	5.73	119	12.46	4	0.54	6	0.78	6	0.84	8	1.67	27	3.03	13	1.53	18	2.03
9674	KIAA0040	9	1.19	13	1.53	32	3.8	19	2.38	19	1.92	6	0.7	5	0.9	19	1.99	28	3.76	36	4.67	31	4.35	12	2.51	47	5.27	36	4.25	13	1.46
9444	quaking homolog, KH domain RNA binding (mouse)	687	90.5	1468	172.76	1699	201.53	718	90.08	1028	103.66	1402	163.24	916	164.14	575	60.19	1373	184.25	1060	137.61	994	139.59	834	174.22	1384	155.17	1146	135.17	1151	129.71
9762	ProSAPiP1 protein	23	3.03	8	0.94	11	1.3	38	4.77	12	1.21	32	3.73	6	1.08	6	0.63	20	2.68	10	1.3	23	3.23	2	0.42	3	0.34	32	3.77	32	3.61
7874	ubiquitin specific peptidase 7 (herpes virus-associated)	199	26.22	360	42.37	424	50.29	372	46.67	251	25.31	310	36.09	197	35.3	192	20.1	400	53.68	343	44.53	407	57.15	232	48.46	430	48.21	406	47.89	414	46.65
29952	dipeptidyl-peptidase 7	170	22.4	187	22.01	212	25.15	184	23.08	490	49.41	233	27.13	152	27.24	806	84.38	310	41.6	189	24.54	270	37.92	168	35.09	312	34.98	282	33.26	255	28.74
54944	hypothetical protein FLJ20464	0	0	0	0	0	0	0	0	0	0	0	0	0	0	4	0.42	0	0	0	0	0	0	0	0	0	0	0	0	0	0
90673	protein phosphatase 1, regulatory (inhibitor) subunit 3E	120	15.81	94	11.06	103	12.22	130	16.31	201	20.27	110	12.81	65	11.65	211	22.09	135	18.12	74	9.61	100	14.04	86	17.96	119	13.34	149	17.57	201	22.65
7389	uroporphyrinogen decarboxylase	34	4.48	62	7.3	54	6.41	35	4.39	1421	143.3	58	6.75	40	7.17	1365	142.89	117	15.7	105	13.63	68	9.55	66	13.79	67	7.51	82	9.67	119	13.41
57524	CASK interacting protein 1	0	0	8	0.94	5	0.59	0	0	0	0	3	0.35	5	0.9	12	1.26	0	0	0	0	8	1.12	3	0.63	12	1.35	3	0.35	3	0.34
100128084	hypothetical protein LOC100128084	132	17.39	5	0.59	16	1.9	115	14.43	2	0.2	12	1.4	7	1.25	5	0.52	20	2.68	24	3.12	12	1.69	21	4.39	10	1.12	11	1.3	30	3.38
644556	similar to exocyst complex component 5	2	0.26	0	0	0	0	0	0	0	0	0	0	0	0	0	0	0	0	0	0	0	0	0	0	0	0	0	0	0	0
170370	family with sequence similarity 170, member B	0	0	0	0	0	0	0	0	0	0	0	0	0	0	3	0.31	0	0	0	0	3	0.42	0	0	0	0	0	0	0	0
55735	DnaJ (Hsp40) homolog, subfamily C, member 11	28	3.69	45	5.3	31	3.68	96	12.04	60	6.05	44	5.12	24	4.3	104	10.89	96	12.88	57	7.4	73	10.25	45	9.4	74	8.3	50	5.9	58	6.54
8575	protein kinase, interferon-inducible double stranded RNA dependent activator	0	0	0	0	0	0	0	0	116	11.7	0	0	0	0	105	10.99	2	0.27	2	0.26	0	0	2	0.42	0	0	2	0.24	9	1.01
339145	family with sequence similarity 92, member B	0	0	0	0	0	0	4	0.5	4	0.4	0	0	0	0	0	0	0	0	0	0	0	0	0	0	0	0	0	0	0	0
55687	tRNA 5-methylaminomethyl-2-thiouridylate methyltransferase	29	3.82	44	5.18	58	6.88	72	9.03	146	14.72	46	5.36	38	6.81	255	26.69	74	9.93	45	5.84	73	10.25	55	11.49	64	7.18	70	8.26	83	9.35
145270	proline rich membrane anchor 1	5	0.66	0	0	0	0	3	0.38	0	0	0	0	0	0	0	0	2	0.27	0	0	0	0	0	0	2	0.22	0	0	3	0.34
100037417	D-dopachrome tautomerase-like	16	2.11	3	0.35	8	0.95	13	1.63	13	1.31	8	0.93	9	1.61	26	2.72	15	2.01	4	0.52	2	0.28	0	0	4	0.45	21	2.48	22	2.48
166379	Bardet-Biedl syndrome 12	0	0	3	0.35	4	0.47	12	1.51	2	0.2	8	0.93	3	0.54	4	0.42	11	1.48	2	0.26	0	0	0	0	4	0.45	0	0	0	0
4771	neurofibromin 2 (merlin)	93	12.25	31	3.65	49	5.81	35	4.39	94	9.48	51	5.94	20	3.58	162	16.96	64	8.59	49	6.36	58	8.14	68	14.2	51	5.72	63	7.43	127	14.31
400661	FLJ44881	2	0.26	0	0	0	0	2	0.25	0	0	0	0	0	0	0	0	0	0	0	0	0	0	0	0	0	0	0	0	0	0
284252	potassium channel tetramerisation domain containing 1	9	1.19	2	0.24	5	0.59	4	0.5	8	0.81	0	0	0	0	12	1.26	7	0.94	0	0	3	0.42	0	0	6	0.67	4	0.47	0	0
8548	basic leucine zipper nuclear factor 1	23	3.03	14	1.65	2	0.24	12	1.51	75	7.56	14	1.63	4	0.72	39	4.08	31	4.16	13	1.69	13	1.83	11	2.3	16	1.79	25	2.95	23	2.59
401242	hypothetical gene supported by AK055503	62	8.17	6	0.71	6	0.71	43	5.39	0	0	15	1.75	5	0.9	0	0	13	1.74	5	0.65	8	1.12	5	1.04	5	0.56	14	1.65	29	3.27
345757	family with sequence similarity 174, member A	212	27.93	302	35.54	258	30.6	391	49.05	697	70.29	260	30.27	77	13.8	294	30.78	78	10.47	68	8.83	95	13.34	81	16.92	155	17.38	177	20.88	220	24.79
11320	mannosyl (alpha-1,3-)-glycoprotein beta-1,4-N-acetylglucosaminyltransferase, isozyme A	663	87.34	527	62.02	562	66.66	410	51.44	690	69.58	804	93.61	521	93.36	504	52.76	977	131.11	613	79.58	536	75.27	493	102.98	972	108.98	822	96.96	902	101.65
6093	Rho-associated, coiled-coil containing protein kinase 1	421	55.46	1129	132.87	1077	127.75	679	85.18	1054	106.29	1284	149.5	672	120.42	773	80.92	882	118.36	638	82.82	837	117.54	566	118.23	1104	123.77	949	111.94	1030	116.07
29796	ubiquinol-cytochrome c reductase complex (7.2 kD)	568	74.83	697	82.03	636	75.44	471	59.09	296	29.85	1042	121.32	645	115.58	330	34.55	700	93.94	510	66.21	519	72.88	476	99.43	972	108.98	664	78.32	902	101.65
10973	activating signal cointegrator 1 complex subunit 3	49	6.46	74	8.71	60	7.12	33	4.14	108	10.89	113	13.16	55	9.86	187	19.58	98	13.15	110	14.28	78	10.95	81	16.92	186	20.85	151	17.81	99	11.16
729092	centaurin, gamma-like family, member 2	5	0.66	15	1.77	5	0.59	18	2.26	0	0	5	0.58	0	0	2	0.21	9	1.21	0	0	8	1.12	3	0.63	6	0.67	8	0.94	6	0.68
27175	tubulin, gamma 2	36	4.74	21	2.47	31	3.68	111	13.93	3	0.3	43	5.01	37	6.63	0	0	63	8.45	35	4.54	36	5.06	24	5.01	63	7.06	47	5.54	60	6.76
253558	lysocardiolipin acyltransferase	36	4.74	36	4.24	46	5.46	37	4.64	122	12.3	34	3.96	18	3.23	113	11.83	44	5.9	40	5.19	32	4.49	43	8.98	36	4.04	48	5.66	74	8.34
18	4-aminobutyrate aminotransferase	96	12.65	197	23.18	246	29.18	157	19.7	234	23.6	222	25.85	185	33.15	158	16.54	133	17.85	101	13.11	154	21.63	106	22.14	244	27.36	180	21.23	147	16.57
366	aquaporin 9	779	102.62	1975	232.43	2898	343.76	1270	159.33	6498	655.26	1742	202.82	1404	251.58	3373	353.1	1343	180.23	1024	132.93	1561	219.21	800	167.11	1725	193.4	1786	210.66	1505	169.6
644727	hypothetical LOC644727	6	0.79	6	0.71	13	1.54	5	0.63	13	1.31	11	1.28	5	0.9	5	0.52	6	0.81	2	0.26	2	0.28	0	0	0	0	0	0	0	0
7728	zinc finger protein 175	4	0.53	10	1.18	9	1.07	10	1.25	22	2.22	9	1.05	6	1.08	44	4.61	35	4.7	14	1.82	5	0.7	9	1.88	11	1.23	4	0.47	18	2.03
23647	ADP-ribosylation factor interacting protein 2	36	4.74	64	7.53	60	7.12	22	2.76	348	35.09	75	8.73	27	4.84	623	65.22	79	10.6	39	5.06	57	8	45	9.4	61	6.84	87	10.26	60	6.76
22880	MORC family CW-type zinc finger 2	18	2.37	19	2.24	26	3.08	34	4.27	29	2.92	33	3.84	18	3.23	121	12.67	57	7.65	41	5.32	39	5.48	26	5.43	66	7.4	67	7.9	36	4.06
55342	spermatid perinuclear RNA binding protein	134	17.65	72	8.47	94	11.15	162	20.32	39	3.93	118	13.74	51	9.14	52	5.44	105	14.09	74	9.61	99	13.9	77	16.08	107	12	117	13.8	202	22.76
83596	BCL2-like 12 (proline rich)	17	2.24	30	3.53	25	2.97	12	1.51	33	3.33	19	2.21	20	3.58	28	2.93	26	3.49	19	2.47	23	3.23	15	3.13	20	2.24	23	2.71	10	1.13
5875	Rab geranylgeranyltransferase, alpha subunit	45	5.93	42	4.94	56	6.64	182	22.83	101	10.18	51	5.94	36	6.45	160	16.75	53	7.11	41	5.32	77	10.81	54	11.28	58	6.5	74	8.73	48	5.41
3109	major histocompatibility complex, class II, DM beta	149	19.63	122	14.36	148	17.56	138	17.31	1373	138.45	292	34	197	35.3	2408	252.08	402	53.95	301	39.08	403	56.59	402	83.97	350	39.24	405	47.77	502	56.57
439921	matrix-remodelling associated 7	192	25.29	19	2.24	13	1.54	88	11.04	7	0.71	14	1.63	6	1.08	8	0.84	58	7.78	42	5.45	22	3.09	41	8.56	20	2.24	27	3.18	83	9.35
3982	lens intrinsic membrane protein 2, 19kDa	5	0.66	2	0.24	0	0	2	0.25	19	1.92	6	0.7	7	1.25	10	1.05	8	1.07	2	0.26	0	0	0	0	0	0	2	0.24	0	0
9991	ROD1 regulator of differentiation 1 (S. pombe)	846	111.45	1741	204.89	2091	248.03	951	119.31	1419	143.09	1604	186.75	1238	221.84	1013	106.05	1303	174.86	995	129.17	1277	179.33	853	178.18	1851	207.52	1894	223.4	1735	195.52
283130	solute carrier family 25, member 45	67	8.83	59	6.94	54	6.41	41	5.14	259	26.12	74	8.62	35	6.27	349	36.53	75	10.06	37	4.8	49	6.88	48	10.03	96	10.76	81	9.55	75	8.45
54757	family with sequence similarity 20, member A	0	0	2	0.24	0	0	0	0	0	0	2	0.23	3	0.54	0	0	4	0.54	6	0.78	0	0	2	0.42	4	0.45	0	0	0	0
5354	proteolipid protein 1	9	1.19	0	0	0	0	0	0	0	0	0	0	0	0	0	0	0	0	0	0	0	0	0	0	0	0	0	0	0	0
340348	tetraspanin 33	50	6.59	31	3.65	29	3.44	74	9.28	82	8.27	76	8.85	36	6.45	191	19.99	112	15.03	87	11.29	52	7.3	76	15.88	94	10.54	78	9.2	125	14.09
255758	Tctex1 domain containing 2	32	4.22	42	4.94	36	4.27	74	9.28	0	0	58	6.75	29	5.2	0	0	79	10.6	43	5.58	56	7.86	38	7.94	106	11.88	75	8.85	109	12.28
285676	zinc finger protein 454	156	20.55	34	4	45	5.34	167	20.95	11	1.11	42	4.89	14	2.51	20	2.09	29	3.89	17	2.21	15	2.11	33	6.89	25	2.8	34	4.01	81	9.13
51265	cyclin-dependent kinase-like 3	2	0.26	3	0.35	5	0.59	6	0.75	0	0	2	0.23	2	0.36	3	0.31	3	0.4	0	0	0	0	0	0	0	0	2	0.24	0	0
6015	ring finger protein 1	1237	162.96	528	62.14	522	61.92	1504	188.68	61	6.15	964	112.24	380	68.09	168	17.59	559	75.02	334	43.36	663	93.1	558	116.56	839	94.06	906	106.87	1326	149.43
200373	primary ciliary dyskinesia protein 1	2	0.26	0	0	0	0	0	0	0	0	0	0	0	0	0	0	0	0	0	0	0	0	0	0	0	0	0	0	0	0
159195	ubiquitin specific peptidase 54	7	0.92	2	0.24	0	0	4	0.5	14	1.41	16	1.86	0	0	0	0	9	1.21	10	1.3	12	1.69	6	1.25	13	1.46	16	1.89	12	1.35
404550	chromosome 16 open reading frame 74	32	4.22	30	3.53	29	3.44	20	2.51	0	0	32	3.73	11	1.97	0	0	27	3.62	34	4.41	35	4.91	32	6.68	48	5.38	46	5.43	65	7.32
100131702	hypothetical protein LOC100131702	0	0	0	0	0	0	0	0	0	0	0	0	0	0	0	0	0	0	0	0	0	0	0	0	0	0	2	0.24	0	0
100133109	similar to histone	91	11.99	32	3.77	20	2.37	20	2.51	0	0	34	3.96	40	7.17	0	0	31	4.16	25	3.25	28	3.93	14	2.92	24	2.69	35	4.13	42	4.73
731779	hypothetical protein LOC731779	0	0	2	0.24	0	0	0	0	0	0	0	0	0	0	0	0	2	0.27	0	0	0	0	0	0	0	0	0	0	0	0
27069	growth hormone inducible transmembrane protein	331	43.6	664	78.14	678	80.42	380	47.67	910	91.77	824	95.94	493	88.34	802	83.96	932	125.07	764	99.18	717	100.69	490	102.36	824	92.38	726	85.63	683	76.97
84856	hypothetical protein MGC16291	58	7.64	42	4.94	54	6.41	23	2.89	14	1.41	56	6.52	15	2.69	2	0.21	64	8.59	45	5.84	48	6.74	41	8.56	40	4.48	43	5.07	74	8.34
2842	G protein-coupled receptor 19	0	0	6	0.71	7	0.83	6	0.75	0	0	6	0.7	0	0	19	1.99	12	1.61	16	2.08	6	0.84	0	0	3	0.34	9	1.06	14	1.58
100134204	hypothetical protein LOC100134204	0	0	3	0.35	0	0	4	0.5	0	0	0	0	0	0	0	0	0	0	0	0	0	0	0	0	0	0	0	0	0	0
80725	SNAP25-interacting protein	0	0	0	0	0	0	0	0	9	0.91	0	0	0	0	0	0	0	0	0	0	0	0	0	0	0	0	2	0.24	0	0
23277	KIAA0664	11	1.45	5	0.59	17	2.02	17	2.13	80	8.07	26	3.03	20	3.58	123	12.88	38	5.1	12	1.56	33	4.63	16	3.34	42	4.71	41	4.84	16	1.8
100130764	hypothetical protein LOC100130764	1076	141.75	37	4.35	30	3.56	397	49.81	52	5.24	28	3.26	13	2.33	12	1.26	106	14.22	93	12.07	34	4.77	138	28.83	38	4.26	91	10.73	322	36.29
80746	tRNA splicing endonuclease 2 homolog (S. cerevisiae)	7	0.92	4	0.47	9	1.07	12	1.51	0	0	8	0.93	6	1.08	0	0	12	1.61	13	1.69	4	0.56	8	1.67	6	0.67	14	1.65	5	0.56
440915	actin, beta-like 3	0	0	0	0	0	0	0	0	0	0	0	0	0	0	0	0	0	0	0	0	5	0.7	0	0	0	0	0	0	0	0
167681	protease, serine, 35	0	0	0	0	0	0	0	0	0	0	0	0	0	0	8	0.84	0	0	0	0	0	0	0	0	3	0.34	2	0.24	2	0.23
26140	tubulin tyrosine ligase-like family, member 3	177	23.32	335	39.43	358	42.47	189	23.71	1551	156.4	505	58.8	351	62.9	1721	180.16	464	62.27	242	31.42	392	55.05	303	63.29	360	40.36	503	59.33	446	50.26
10907	thioredoxin-like 4A	109	14.36	134	15.77	144	17.08	81	10.16	224	22.59	173	20.14	89	15.95	368	38.52	213	28.58	134	17.4	142	19.94	108	22.56	231	25.9	166	19.58	203	22.88
83872	hemicentin 1	3	0.4	0	0	0	0	0	0	3	0.3	0	0	0	0	0	0	0	0	2	0.26	0	0	0	0	2	0.22	0	0	0	0
57232	zinc finger protein 630	0	0	7	0.82	3	0.36	0	0	54	5.45	5	0.58	2	0.36	20	2.09	0	0	2	0.26	0	0	4	0.84	6	0.67	3	0.35	4	0.45
59339	pleckstrin homology domain containing, family A (phosphoinositide binding specific) member 2	361	47.56	619	72.85	604	71.65	379	47.55	735	74.12	829	96.52	500	89.6	1013	106.05	1061	142.38	644	83.6	584	82.01	447	93.37	828	92.83	815	96.13	757	85.31
55093	chromosome 8 open reading frame 32	2	0.26	6	0.71	6	0.71	7	0.88	0	0	5	0.58	3	0.54	14	1.47	15	2.01	6	0.78	16	2.25	8	1.67	24	2.69	16	1.89	11	1.24
57494	family with sequence similarity 80, member B	45	5.93	20	2.35	3	0.36	14	1.76	7	0.71	27	3.14	11	1.97	9	0.94	33	4.43	21	2.73	15	2.11	17	3.55	22	2.47	38	4.48	38	4.28
2998	glycogen synthase 2 (liver)	0	0	0	0	0	0	0	0	0	0	0	0	0	0	0	0	4	0.54	3	0.39	0	0	0	0	2	0.22	3	0.35	0	0
6790	aurora kinase A	64	8.43	20	2.35	29	3.44	6	0.75	4	0.4	22	2.56	22	3.94	26	2.72	13	1.74	4	0.52	11	1.54	15	3.13	27	3.03	21	2.48	31	3.49
6262	ryanodine receptor 2 (cardiac)	2	0.26	0	0	0	0	0	0	0	0	5	0.58	2	0.36	4	0.42	4	0.54	4	0.52	6	0.84	0	0	4	0.45	2	0.24	2	0.23
85444	leucine rich repeat and coiled-coil domain containing 1	11	1.45	6	0.71	5	0.59	0	0	0	0	13	1.51	4	0.72	0	0	30	4.03	15	1.95	19	2.67	10	2.09	14	1.57	22	2.59	14	1.58
2865	free fatty acid receptor 3	0	0	0	0	0	0	0	0	27	2.72	0	0	0	0	25	2.62	0	0	0	0	0	0	0	0	0	0	0	0	0	0
130355	chromosome 2 open reading frame 76	36	4.74	41	4.83	74	8.78	44	5.52	0	0	39	4.54	34	6.09	0	0	46	6.17	38	4.93	53	7.44	33	6.89	49	5.49	56	6.61	48	5.41
43847	kallikrein-related peptidase 14	3	0.4	0	0	2	0.24	0	0	0	0	3	0.35	0	0	0	0	3	0.4	0	0	0	0	0	0	0	0	6	0.71	0	0
91653	Boc homolog (mouse)	0	0	0	0	0	0	0	0	0	0	0	0	0	0	0	0	0	0	0	0	2	0.28	0	0	0	0	0	0	0	0
84632	actin filament associated protein 1-like 2	12	1.58	7	0.82	13	1.54	56	7.03	19	1.92	8	0.93	3	0.54	9	0.94	19	2.55	4	0.52	5	0.7	3	0.63	11	1.23	8	0.94	15	1.69
55697	Vac14 homolog (S. cerevisiae)	41	5.4	52	6.12	47	5.58	19	2.38	450	45.38	65	7.57	40	7.17	1182	123.74	74	9.93	52	6.75	62	8.71	65	13.58	73	8.18	62	7.31	51	5.75
100133394	hypothetical protein LOC100133394	0	0	0	0	0	0	0	0	0	0	0	0	0	0	0	0	2	0.27	0	0	0	0	0	0	0	0	0	0	0	0
3554	interleukin 1 receptor, type I	161	21.21	887	104.39	868	102.96	91	11.42	831	83.8	871	101.41	572	102.5	463	48.47	180	24.16	258	33.49	352	49.43	140	29.24	535	59.98	359	42.35	305	34.37
54776	protein phosphatase 1, regulatory (inhibitor) subunit 12C	312	41.1	726	85.44	729	86.47	173	21.7	1289	129.98	667	77.66	452	80.99	1376	144.05	504	67.63	399	51.8	558	78.36	305	63.71	826	92.61	617	72.78	560	63.11
100134412	similar to CG10806-like	0	0	0	0	0	0	0	0	0	0	0	0	0	0	0	0	0	0	0	0	0	0	0	0	0	0	0	0	10	1.13
55361	phosphatidylinositol 4-kinase type 2 alpha	20	2.63	20	2.35	18	2.14	53	6.65	113	11.4	41	4.77	15	2.69	121	12.67	49	6.58	40	5.19	31	4.35	34	7.1	42	4.71	43	5.07	72	8.11
55049	chromosome 19 open reading frame 60	131	17.26	116	13.65	164	19.45	470	58.96	797	80.37	99	11.53	60	10.75	942	98.61	123	16.51	92	11.94	106	14.89	76	15.88	96	10.76	116	13.68	137	15.44
7102	tetraspanin 7	0	0	10	1.18	4	0.47	0	0	0	0	0	0	0	0	0	0	4	0.54	7	0.91	3	0.42	0	0	6	0.67	0	0	0	0
387921	NHL repeat containing 3	87	11.46	52	6.12	93	11.03	298	37.39	110	11.09	67	7.8	37	6.63	91	9.53	125	16.77	56	7.27	84	11.8	59	12.32	81	9.08	96	11.32	146	16.45
54494	chromosome 11 open reading frame 71	4	0.53	8	0.94	11	1.3	15	1.88	35	3.53	13	1.51	8	1.43	44	4.61	3	0.4	2	0.26	3	0.42	12	2.51	14	1.57	7	0.83	8	0.9
57721	KIAA1627 protein	24	3.16	19	2.24	27	3.2	49	6.15	58	5.85	45	5.24	25	4.48	46	4.82	95	12.75	57	7.4	77	10.81	49	10.24	73	8.18	40	4.72	63	7.1
256949	KN motif and ankyrin repeat domains 3	5	0.66	5	0.59	2	0.24	14	1.76	0	0	0	0	3	0.54	30	3.14	12	1.61	7	0.91	3	0.42	5	1.04	19	2.13	7	0.83	8	0.9
29127	Rac GTPase activating protein 1	13	1.71	16	1.88	19	2.25	49	6.15	2	0.2	21	2.45	10	1.79	18	1.88	32	4.29	22	2.86	18	2.53	18	3.76	38	4.26	25	2.95	50	5.63
29889	guanine nucleotide binding protein-like 2 (nucleolar)	111	14.62	101	11.89	65	7.71	246	30.86	78	7.87	166	19.33	66	11.83	99	10.36	97	13.02	55	7.14	111	15.59	57	11.91	81	9.08	84	9.91	150	16.9
8497	protein tyrosine phosphatase, receptor type, f polypeptide (PTPRF), interacting protein (liprin), alpha 4	3	0.4	0	0	0	0	0	0	0	0	2	0.23	0	0	4	0.42	23	3.09	16	2.08	19	2.67	24	5.01	7	0.78	9	1.06	9	1.01
57447	NDRG family member 2	74	9.75	34	4	27	3.2	48	6.02	4	0.4	94	10.94	31	5.55	27	2.83	73	9.8	37	4.8	87	12.22	40	8.36	102	11.44	117	13.8	88	9.92
731489	hypothetical protein LOC731489	46	6.06	17	2	19	2.25	164	20.57	44	4.44	40	4.66	9	1.61	71	7.43	13	1.74	3	0.39	15	2.11	3	0.63	40	4.48	45	5.31	68	7.66
282996	RNA binding motif protein 20	3	0.4	5	0.59	2	0.24	4	0.5	0	0	0	0	0	0	2	0.21	2	0.27	3	0.39	5	0.7	3	0.63	2	0.22	5	0.59	0	0
6208	ribosomal protein S14	1887	248.59	1161	136.63	1828	216.84	4093	513.48	17408	1755.44	2464	286.88	1412	253.02	24680	2583.62	3328	446.61	2039	264.7	2529	355.14	2285	477.32	3322	372.44	3172	374.15	4303	484.91
7587	zinc finger protein 37A	355	46.77	58	6.83	62	7.35	100	12.55	136	13.71	61	7.1	28	5.02	165	17.27	86	11.54	58	7.53	80	11.23	64	13.37	67	7.51	121	14.27	117	13.18
154790	C-type lectin domain family 2, member L	0	0	0	0	0	0	0	0	0	0	6	0.7	0	0	8	0.84	0	0	0	0	2	0.28	0	0	0	0	2	0.24	0	0
9045	ribosomal protein L14	0	0	0	0	0	0	0	0	2564	258.56	0	0	0	0	3601	376.97	10	1.34	5	0.65	8	1.12	2	0.42	0	0	0	0	0	0
84879	major facilitator superfamily domain containing 2	2	0.26	10	1.18	7	0.83	12	1.51	15	1.51	11	1.28	2	0.36	32	3.35	9	1.21	11	1.43	6	0.84	16	3.34	4	0.45	2	0.24	8	0.9
341418	olfactory receptor, family 6, subfamily C, member 4	0	0	0	0	0	0	0	0	0	0	0	0	0	0	0	0	0	0	0	0	0	0	2	0.42	0	0	0	0	0	0
9274	B-cell CLL/lymphoma 7C	39	5.14	16	1.88	29	3.44	60	7.53	60	6.05	44	5.12	17	3.05	188	19.68	36	4.83	25	3.25	18	2.53	33	6.89	42	4.71	46	5.43	52	5.86
81550	tudor domain containing 3	6	0.79	8	0.94	17	2.02	30	3.76	35	3.53	14	1.63	5	0.9	49	5.13	27	3.62	17	2.21	18	2.53	8	1.67	29	3.25	28	3.3	42	4.73
1965	eukaryotic translation initiation factor 2, subunit 1 alpha, 35kDa	136	17.92	168	19.77	154	18.27	164	20.57	271	27.33	225	26.2	98	17.56	277	29	295	39.59	216	28.04	205	28.79	174	36.35	208	23.32	249	29.37	303	34.15
4669	N-acetylglucosaminidase, alpha-	44	5.8	40	4.71	48	5.69	71	8.91	68	6.86	112	13.04	47	8.42	128	13.4	138	18.52	20	2.6	80	11.23	77	16.08	79	8.86	96	11.32	61	6.87
347735	serine incorporator 2	0	0	3	0.35	10	1.19	0	0	5	0.5	11	1.28	5	0.9	15	1.57	6	0.81	0	0	4	0.56	0	0	0	0	9	1.06	3	0.34
100129657	hypothetical protein LOC100129657	0	0	0	0	0	0	0	0	10	1.01	0	0	0	0	14	1.47	0	0	0	0	0	0	0	0	0	0	0	0	0	0
80350	lipoprotein, Lp(a)-like 2	49	6.46	39	4.59	36	4.27	56	7.03	0	0	46	5.36	35	6.27	2	0.21	61	8.19	47	6.1	26	3.65	31	6.48	68	7.62	43	5.07	55	6.2
100129391	similar to Zinc finger (CCCH type), RNA-binding motif and serine/arginine rich 2	24	3.16	3	0.35	3	0.36	22	2.76	72	7.26	9	1.05	0	0	102	10.68	6	0.81	6	0.78	0	0	4	0.84	6	0.67	8	0.94	8	0.9
85452	KIAA1751	0	0	0	0	0	0	3	0.38	2	0.2	0	0	0	0	0	0	0	0	0	0	2	0.28	0	0	0	0	0	0	0	0
727826	hypothetical LOC727826	0	0	0	0	2	0.24	0	0	0	0	3	0.35	0	0	0	0	4	0.54	2	0.26	3	0.42	0	0	0	0	0	0	4	0.45
146712	UDP-GlcNAc:betaGal beta-1,3-N-acetylglucosaminyltransferase-like 1	58	7.64	188	22.13	138	16.37	49	6.15	176	17.75	145	16.88	83	14.87	96	10.05	137	18.38	91	11.81	111	15.59	70	14.62	75	8.41	73	8.61	103	11.61
7332	ubiquitin-conjugating enzyme E2L 3	71	9.35	110	12.95	120	14.23	94	11.79	408	41.14	116	13.51	50	8.96	535	56.01	99	13.29	87	11.29	71	9.97	65	13.58	158	17.71	97	11.44	84	9.47
3646	eukaryotic translation initiation factor 3, subunit E	782	103.02	460	54.14	758	89.91	1718	215.53	430	43.36	988	115.03	443	79.38	541	56.63	1693	227.19	982	127.48	1084	152.22	808	168.78	1379	154.61	1390	163.95	1806	203.52
5229	protein geranylgeranyltransferase type I, beta subunit	46	6.06	87	10.24	78	9.25	50	6.27	25	2.52	84	9.78	70	12.54	27	2.83	72	9.66	78	10.13	89	12.5	54	11.28	97	10.88	89	10.5	90	10.14
7096	toll-like receptor 1	612	80.62	1219	143.46	1504	178.4	600	75.27	603	60.81	1364	158.81	891	159.66	438	45.85	569	76.36	559	72.57	772	108.41	567	118.44	916	102.7	1015	119.72	984	110.89
400645	hypothetical gene supported by AK127888	141	18.57	3	0.35	2	0.24	9	1.13	3	0.3	5	0.58	0	0	10	1.05	8	1.07	5	0.65	4	0.56	20	4.18	0	0	2	0.24	5	0.56
100129977	similar to 60S acidic ribosomal protein P1	0	0	0	0	0	0	0	0	7	0.71	0	0	0	0	14	1.47	0	0	0	0	0	0	0	0	0	0	0	0	0	0
651198	similar to hCG2036706	0	0	2	0.24	0	0	0	0	15	1.51	4	0.47	11	1.97	17	1.78	47	6.31	35	4.54	19	2.67	19	3.97	20	2.24	25	2.95	17	1.92
64801	ARV1 homolog (S. cerevisiae)	27	3.56	48	5.65	47	5.58	45	5.65	53	5.34	49	5.71	42	7.53	42	4.4	84	11.27	69	8.96	32	4.49	25	5.22	55	6.17	54	6.37	64	7.21
256536	transcription elongation regulator 1-like	9	1.19	0	0	0	0	0	0	0	0	2	0.23	0	0	0	0	0	0	0	0	0	0	0	0	0	0	0	0	4	0.45
10641	tumor suppressor candidate 4	36	4.74	104	12.24	101	11.98	114	14.3	55	5.55	105	12.23	79	14.16	96	10.05	199	26.71	140	18.17	121	16.99	84	17.55	146	16.37	147	17.34	103	11.61
348262	hypothetical protein LOC348262	36	4.74	38	4.47	49	5.81	185	23.21	312	31.46	32	3.73	21	3.76	433	45.33	33	4.43	34	4.41	51	7.16	29	6.06	33	3.7	35	4.13	34	3.83
389816	leucine rich repeat containing 26	2	0.26	0	0	0	0	3	0.38	0	0	0	0	0	0	0	0	0	0	0	0	0	0	0	0	5	0.56	0	0	0	0
57714	KIAA1618	69	9.09	23	2.71	10	1.19	25	3.14	7	0.71	37	4.31	25	4.48	11	1.15	40	5.37	46	5.97	35	4.91	38	7.94	52	5.83	36	4.25	32	3.61
2738	GLI-Kruppel family member GLI4	66	8.69	80	9.41	46	5.46	31	3.89	75	7.56	122	14.2	54	9.68	57	5.97	85	11.41	46	5.97	77	10.81	54	11.28	121	13.57	104	12.27	70	7.89
57186	chromosome 20 open reading frame 74	0	0	21	2.47	20	2.37	0	0	7	0.71	10	1.16	2	0.36	8	0.84	17	2.28	11	1.43	21	2.95	11	2.3	8	0.9	24	2.83	21	2.37
51744	CD244 molecule, natural killer cell receptor 2B4	323	42.55	337	39.66	320	37.96	948	118.93	223	22.49	419	48.78	210	37.63	299	31.3	646	86.69	410	53.23	454	63.75	351	73.32	424	47.54	340	40.1	556	62.66
31	acetyl-Coenzyme A carboxylase alpha	10	1.32	14	1.65	21	2.49	38	4.77	13	1.31	20	2.33	14	2.51	18	1.88	34	4.56	27	3.51	27	3.79	22	4.6	19	2.13	34	4.01	24	2.7
1345	cytochrome c oxidase subunit VIc	402	52.96	313	36.84	418	49.58	568	71.26	270	27.23	610	71.02	288	51.61	220	23.03	644	86.42	424	55.04	407	57.15	380	79.38	850	95.3	630	74.31	924	104.13
54941	ring finger protein 125	822	108.29	533	62.73	397	47.09	446	55.95	1894	190.99	428	49.83	287	51.43	1445	151.27	474	63.61	272	35.31	259	36.37	279	58.28	386	43.28	476	56.15	555	62.54
11262	SP140 nuclear body protein	135	17.78	132	15.53	169	20.05	125	15.68	223	22.49	157	18.28	123	22.04	270	28.26	194	26.03	163	21.16	121	16.99	159	33.21	249	27.92	166	19.58	264	29.75
253482	similar to mCG22088	0	0	0	0	0	0	0	0	0	0	0	0	0	0	2	0.21	0	0	0	0	0	0	0	0	0	0	0	0	0	0
84285	eukaryotic translation initiation factor 1A domain containing	86	11.33	20	2.35	27	3.2	36	4.52	34	3.43	37	4.31	20	3.58	31	3.25	61	8.19	38	4.93	32	4.49	35	7.31	43	4.82	44	5.19	77	8.68
84791	chromosome 1 open reading frame 97	16	2.11	7	0.82	13	1.54	9	1.13	8	0.81	5	0.58	3	0.54	6	0.63	4	0.54	9	1.17	5	0.7	6	1.25	16	1.79	14	1.65	0	0
829	capping protein (actin filament) muscle Z-line, alpha 1	1615	212.75	2090	245.97	3034	359.89	4239	531.8	1530	154.29	2108	245.43	1723	308.75	706	73.91	1888	253.36	1386	179.93	1832	257.26	1268	264.87	2162	242.39	2063	243.34	2697	303.93
3188	heterogeneous nuclear ribonucleoprotein H2 (H')	105	13.83	391	46.02	413	48.99	115	14.43	812	81.88	348	40.52	299	53.58	462	48.36	487	65.35	351	45.57	452	63.47	267	55.77	479	53.7	409	48.24	264	29.75
51206	glycoprotein VI (platelet)	127	16.73	13	1.53	19	2.25	18	2.26	58	5.85	32	3.73	12	2.15	36	3.77	46	6.17	33	4.28	17	2.39	43	8.98	34	3.81	48	5.66	49	5.52
55847	CDGSH iron sulfur domain 1	61	8.04	29	3.41	31	3.68	89	11.17	98	9.88	44	5.12	23	4.12	86	9	56	7.51	31	4.02	30	4.21	38	7.94	47	5.27	75	8.85	38	4.28
645822	similar to ubiquitin specific peptidase 32	0	0	0	0	0	0	0	0	0	0	0	0	0	0	0	0	0	0	0	0	0	0	0	0	0	0	0	0	2	0.23
10691	glucocorticoid modulatory element binding protein 1	4	0.53	4	0.47	9	1.07	16	2.01	12	1.21	4	0.47	2	0.36	40	4.19	0	0	6	0.78	5	0.7	16	3.34	0	0	15	1.77	11	1.24
8916	hect domain and RLD 3	43	5.66	99	11.65	143	16.96	170	21.33	233	23.5	94	10.94	113	20.25	192	20.1	228	30.6	153	19.86	117	16.43	102	21.31	100	11.21	164	19.34	111	12.51
6929	transcription factor 3 (E2A immunoglobulin enhancer binding factors E12/E47)	178	23.45	102	12	119	14.12	342	42.91	659	66.45	107	12.46	53	9.5	881	92.23	161	21.61	102	13.24	170	23.87	71	14.83	176	19.73	211	24.89	211	23.78
415116	pim-3 oncogene	138	18.18	417	49.08	470	55.75	18	2.26	11254	1134.86	405	47.15	254	45.51	3917	410.05	207	27.78	168	21.81	270	37.92	139	29.04	564	63.23	411	48.48	235	26.48
23558	WW domain binding protein 2	708	93.27	2287	269.15	2216	262.86	588	73.77	2201	221.95	1861	216.68	1155	206.96	1264	132.32	1106	148.42	1106	143.58	1133	159.1	857	179.02	2193	245.87	1734	204.53	1549	174.56
285440	cytochrome P450, family 4, subfamily V, polypeptide 2	107	14.1	65	7.65	92	10.91	55	6.9	127	12.81	141	16.42	68	12.18	177	18.53	141	18.92	108	14.02	101	14.18	47	9.82	198	22.2	160	18.87	163	18.37
5310	polycystic kidney disease 1 (autosomal dominant)	53	6.98	65	7.65	36	4.27	26	3.26	53	5.34	79	9.2	40	7.17	61	6.39	94	12.61	86	11.16	70	9.83	51	10.65	98	10.99	81	9.55	103	11.61
152687	zinc finger protein 595	7	0.92	0	0	6	0.71	6	0.75	32	3.23	4	0.47	3	0.54	68	7.12	5	0.67	3	0.39	0	0	0	0	7	0.78	5	0.59	10	1.13
80736	solute carrier family 44, member 4	54	7.11	4	0.47	8	0.95	32	4.01	15	1.51	6	0.7	6	1.08	16	1.67	6	0.81	5	0.65	4	0.56	0	0	3	0.34	11	1.3	24	2.7
728531	hypothetical LOC728531	2	0.26	0	0	3	0.36	0	0	45	4.54	2	0.23	0	0	42	4.4	0	0	5	0.65	4	0.56	3	0.63	4	0.45	5	0.59	8	0.9
151651	EF-hand domain family, member B	0	0	0	0	0	0	0	0	0	0	0	0	0	0	0	0	0	0	0	0	0	0	0	0	0	0	0	0	8	0.9
63916	engulfment and cell motility 2	108	14.23	135	15.89	140	16.61	228	28.6	409	41.24	171	19.91	149	26.7	350	36.64	264	35.43	156	20.25	165	23.17	116	24.23	173	19.4	134	15.81	200	22.54
51003	mediator complex subunit 31	142	18.71	200	23.54	200	23.72	40	5.02	0	0	211	24.57	141	25.27	0	0	207	27.78	113	14.67	117	16.43	98	20.47	217	24.33	141	16.63	165	18.59
27163	N-acylethanolamine acid amidase	137	18.05	213	25.07	205	24.32	268	33.62	230	23.19	409	47.62	204	36.55	334	34.96	521	69.92	308	39.98	412	57.86	310	64.76	525	58.86	481	56.74	392	44.18
3779	potassium large conductance calcium-activated channel, subfamily M, beta member 1	20	2.63	23	2.71	11	1.3	56	7.03	14	1.41	32	3.73	21	3.76	22	2.3	25	3.35	15	1.95	35	4.91	19	3.97	24	2.69	30	3.54	21	2.37
54439	RNA binding motif protein 27	108	14.23	120	14.12	117	13.88	37	4.64	135	13.61	124	14.44	74	13.26	140	14.66	185	24.83	112	14.54	122	17.13	121	25.28	175	19.62	226	26.66	94	10.59
10609	synaptonemal complex protein SC65	4	0.53	0	0	5	0.59	13	1.63	0	0	4	0.47	2	0.36	0	0	8	1.07	8	1.04	2	0.28	5	1.04	4	0.45	7	0.83	27	3.04
25782	RAB3 GTPase activating protein subunit 2 (non-catalytic)	63	8.3	66	7.77	90	10.68	95	11.92	67	6.76	67	7.8	60	10.75	50	5.23	139	18.65	102	13.24	83	11.66	60	12.53	62	6.95	75	8.85	112	12.62
6911	T-box 6	160	21.08	2	0.24	0	0	49	6.15	0	0	5	0.58	2	0.36	3	0.31	8	1.07	18	2.34	6	0.84	14	2.92	2	0.22	9	1.06	17	1.92
219844	hydrolethalus syndrome 1	27	3.56	8	0.94	14	1.66	50	6.27	11	1.11	13	1.51	9	1.61	27	2.83	21	2.82	17	2.21	12	1.69	2	0.42	18	2.02	14	1.65	12	1.35
285193	dual specificity phosphatase 28	113	14.89	107	12.59	84	9.96	203	25.47	0	0	103	11.99	36	6.45	2	0.21	107	14.36	74	9.61	64	8.99	56	11.7	95	10.65	88	10.38	156	17.58
10379	interferon regulatory factor 9	307	40.44	611	71.91	875	103.79	1127	141.39	331	33.38	409	47.62	419	75.08	461	48.26	401	53.81	268	34.79	472	66.28	388	81.05	399	44.73	492	58.03	561	63.22
8799	peroxisomal biogenesis factor 11 beta	238	31.35	219	25.77	183	21.71	133	16.69	86	8.67	244	28.41	141	25.27	72	7.54	161	21.61	122	15.84	165	23.17	119	24.86	247	27.69	205	24.18	305	34.37
84246	mediator complex subunit 10	139	18.31	146	17.18	150	17.79	151	18.94	308	31.06	259	30.16	193	34.58	293	30.67	241	32.34	153	19.86	181	25.42	133	27.78	320	35.88	229	27.01	217	24.45
6624	fascin homolog 1, actin-bundling protein (Strongylocentrotus purpuratus)	4	0.53	24	2.82	20	2.37	13	1.63	9	0.91	35	4.08	19	3.4	12	1.26	23	3.09	20	2.6	15	2.11	18	3.76	21	2.35	23	2.71	10	1.13
3181	heterogeneous nuclear ribonucleoprotein A2/B1	5884	775.14	6241	734.48	6168	731.64	7977	1000.74	8272	834.16	9149	1065.22	4266	764.43	6561	686.84	7128	956.55	4918	638.45	5111	717.73	4269	891.76	8869	994.34	7083	835.46	7744	872.69
728649	hypothetical LOC728649	28	3.69	68	8	134	15.89	112	14.05	0	0	53	6.17	43	7.71	8	0.84	9	1.21	10	1.3	24	3.37	10	2.09	18	2.02	20	2.36	26	2.93
4185	ADAM metallopeptidase domain 11	0	0	0	0	0	0	0	0	28	2.82	0	0	0	0	10	1.05	0	0	2	0.26	0	0	0	0	2	0.22	0	0	0	0
8817	fibroblast growth factor 18	0	0	0	0	0	0	12	1.51	0	0	0	0	0	0	0	0	0	0	0	0	0	0	2	0.42	0	0	0	0	0	0
140885	signal-regulatory protein alpha	858	113.03	2906	342	3539	419.79	789	98.98	1443	145.51	2353	273.96	1250	223.99	1003	105	1160	155.67	1018	132.15	1414	198.57	713	148.94	1981	222.1	1701	200.64	1492	168.14
56339	methyltransferase like 3	423	55.72	290	34.13	388	46.02	1174	147.28	388	39.13	398	46.34	197	35.3	484	50.67	435	58.38	273	35.44	350	49.15	256	53.48	459	51.46	459	54.14	562	63.33
2086	endogenous retroviral sequence 3 (includes zinc finger protein H-plk/HPF9)	3	0.4	0	0	2	0.24	0	0	21	2.12	0	0	0	0	8	0.84	5	0.67	0	0	2	0.28	3	0.63	6	0.67	0	0	0	0
1522	cathepsin Z	315	41.5	528	62.14	778	92.29	425	53.32	699	70.49	614	71.49	516	92.46	855	89.51	801	107.49	669	86.85	813	114.17	699	146.02	786	88.12	704	83.04	673	75.84
114971	protein tyrosine phosphatase, mitochondrial 1	37	4.87	25	2.94	35	4.15	33	4.14	105	10.59	59	6.87	17	3.05	256	26.8	56	7.51	57	7.4	48	6.74	41	8.56	38	4.26	74	8.73	64	7.21
4927	nucleoporin 88kDa	77	10.14	50	5.88	74	8.78	281	35.25	144	14.52	105	12.23	63	11.29	111	11.62	164	22.01	141	18.3	86	12.08	78	16.29	129	14.46	153	18.05	173	19.5
55213	regulator of chromosome condensation (RCC1) and BTB (POZ) domain containing protein 1	215	28.32	443	52.14	298	35.35	118	14.8	145	14.62	428	49.83	269	48.2	147	15.39	179	24.02	167	21.68	154	21.63	115	24.02	361	40.47	283	33.38	198	22.31
142	poly (ADP-ribose) polymerase 1	121	15.94	134	15.77	131	15.54	55	6.9	174	17.55	154	17.93	100	17.92	268	28.06	211	28.32	210	27.26	178	25	150	31.33	243	27.24	236	27.84	202	22.76
100130769	similar to polymerase (RNA) III (DNA directed) polypeptide G (32kD)	0	0	0	0	0	0	0	0	0	0	0	0	0	0	0	0	0	0	2	0.26	0	0	0	0	0	0	0	0	0	0
54586	chromosome 9 open reading frame 11	0	0	0	0	0	0	0	0	0	0	0	0	0	0	8	0.84	0	0	0	0	0	0	0	0	0	0	0	0	0	0
5525	protein phosphatase 2, regulatory subunit B', alpha isoform	147	19.37	497	58.49	632	74.97	306	38.39	1636	164.98	431	50.18	458	82.07	1027	107.51	493	66.16	368	47.77	512	71.9	256	53.48	705	79.04	713	84.1	735	82.83
6009	Ras homolog enriched in brain	133	17.52	208	24.48	202	23.96	144	18.07	497	50.12	206	23.98	109	19.53	386	40.41	202	27.11	132	17.14	182	25.56	172	35.93	213	23.88	206	24.3	178	20.06
100132899	similar to immunoglobulin superfamily, member 3	0	0	23	2.71	35	4.15	0	0	0	0	32	3.73	21	3.76	0	0	27	3.62	12	1.56	35	4.91	8	1.67	30	3.36	26	3.07	24	2.7
284232	similar to ankyrin repeat domain 20 family, member A2	12	1.58	6	0.71	0	0	16	2.01	0	0	8	0.93	0	0	0	0	7	0.94	5	0.65	2	0.28	7	1.46	11	1.23	0	0	13	1.46
55347	abhydrolase domain containing 10	30	3.95	76	8.94	73	8.66	13	1.63	23	2.32	123	14.32	112	20.07	85	8.9	110	14.76	96	12.46	67	9.41	56	11.7	127	14.24	104	12.27	128	14.42
404636	family with sequence similarity 45, member A	91	11.99	293	34.48	261	30.96	102	12.8	648	65.34	392	45.64	282	50.53	778	81.44	515	69.11	372	48.29	488	68.53	341	71.23	531	59.53	524	61.81	458	51.61
583	Bardet-Biedl syndrome 2	90	11.86	98	11.53	125	14.83	72	9.03	80	8.07	187	21.77	94	16.84	152	15.91	196	26.3	154	19.99	160	22.47	111	23.19	180	20.18	227	26.78	240	27.05
100132848	hypothetical protein LOC100132848	0	0	0	0	0	0	0	0	14	1.41	0	0	0	0	10	1.05	0	0	0	0	0	0	0	0	0	0	0	0	0	0
3792	Kell blood group, metallo-endopeptidase	0	0	0	0	0	0	2	0.25	0	0	0	0	4	0.72	0	0	2	0.27	3	0.39	2	0.28	0	0	5	0.56	7	0.83	0	0
80150	asparaginase like 1	28	3.69	45	5.3	30	3.56	19	2.38	26	2.62	58	6.75	22	3.94	29	3.04	39	5.23	14	1.82	29	4.07	20	4.18	66	7.4	36	4.25	25	2.82
127700	chromosome 1 open reading frame 102	0	0	5	0.59	0	0	6	0.75	0	0	2	0.23	0	0	0	0	0	0	0	0	5	0.7	0	0	0	0	2	0.24	5	0.56
5723	phosphoserine phosphatase	0	0	3	0.35	4	0.47	0	0	5	0.5	4	0.47	4	0.72	5	0.52	2	0.27	0	0	0	0	0	0	2	0.22	0	0	9	1.01
148268	zinc finger protein 570	4	0.53	0	0	0	0	5	0.63	0	0	0	0	0	0	0	0	4	0.54	9	1.17	2	0.28	0	0	0	0	2	0.24	0	0
2872	MAP kinase interacting serine/threonine kinase 2	968	127.52	3445	405.43	2505	297.14	389	48.8	2087	210.46	3666	426.83	1992	356.95	1691	177.02	1384	185.73	1171	152.02	1584	222.44	847	176.93	4022	450.92	2730	322.01	1447	163.07
79290	olfactory receptor, family 13, subfamily A, member 1	0	0	0	0	0	0	0	0	0	0	0	0	0	0	0	0	0	0	0	0	0	0	0	0	4	0.45	2	0.24	0	0
6595	SWI/SNF related, matrix associated, actin dependent regulator of chromatin, subfamily a, member 2	287	37.81	318	37.42	439	52.07	445	55.83	177	17.85	373	43.43	205	36.73	340	35.59	471	63.21	327	42.45	379	53.22	245	51.18	393	44.06	429	50.6	456	51.39
50511	synaptonemal complex protein 3	9	1.19	12	1.41	12	1.42	4	0.5	7	0.71	15	1.75	5	0.9	0	0	11	1.48	13	1.69	14	1.97	8	1.67	8	0.9	9	1.06	21	2.37
2909	glucocorticoid receptor DNA binding factor 1	90	11.86	70	8.24	80	9.49	295	37.01	256	25.82	94	10.94	51	9.14	313	32.77	186	24.96	107	13.89	97	13.62	99	20.68	137	15.36	156	18.4	124	13.97
9480	one cut homeobox 2	3	0.4	2	0.24	0	0	4	0.5	0	0	0	0	0	0	0	0	0	0	0	0	0	0	0	0	0	0	0	0	0	0
100128414	similar to fibrinogen silencer binding protein	2	0.26	0	0	0	0	0	0	0	0	5	0.58	0	0	0	0	0	0	2	0.26	0	0	0	0	0	0	6	0.71	0	0
92689	family with sequence similarity 114, member A1	0	0	0	0	0	0	0	0	0	0	2	0.23	0	0	0	0	0	0	0	0	2	0.28	0	0	0	0	0	0	0	0
645104	clarin 2	3	0.4	0	0	0	0	0	0	0	0	0	0	0	0	0	0	0	0	0	0	0	0	0	0	0	0	0	0	0	0
10589	DR1-associated protein 1 (negative cofactor 2 alpha)	198	26.08	263	30.95	353	41.87	286	35.88	602	60.71	283	32.95	212	37.99	693	72.55	514	68.98	290	37.65	422	59.26	435	90.87	433	48.55	449	52.96	433	48.8
649853	major histocompatibility complex class I HLA-A29.1	7	0.92	16	1.88	18	2.14	7	0.88	0	0	43	5.01	62	11.11	0	0	19	2.55	17	2.21	7	0.98	15	3.13	112	12.56	210	24.77	94	10.59
29	active BCR-related gene	371	48.87	561	66.02	666	79	998	125.2	36	3.63	444	51.7	339	60.75	43	4.5	443	59.45	311	40.37	498	69.93	311	64.97	574	64.35	530	62.52	465	52.4
23014	F-box protein 21	35	4.61	36	4.24	28	3.32	101	12.67	37	3.73	40	4.66	21	3.76	80	8.37	87	11.68	63	8.18	72	10.11	55	11.49	61	6.84	65	7.67	72	8.11
26797	small nucleolar RNA, C/D box 52	0	0	3	0.35	4	0.47	0	0	0	0	0	0	0	0	0	0	15	2.01	0	0	3	0.42	3	0.63	12	1.35	3	0.35	0	0
729862	similar to Striatin	0	0	0	0	0	0	0	0	6	0.61	0	0	0	0	0	0	0	0	0	0	0	0	0	0	0	0	0	0	0	0
3709	inositol 1,4,5-triphosphate receptor, type 2	133	17.52	206	24.24	221	26.21	309	38.77	140	14.12	159	18.51	104	18.64	161	16.85	210	28.18	155	20.12	144	20.22	92	19.22	235	26.35	217	25.6	278	31.33
10105	peptidylprolyl isomerase F (cyclophilin F)	403	53.09	799	94.03	588	69.75	801	100.49	927	93.48	577	67.18	233	41.75	611	63.96	465	62.4	322	41.8	565	79.34	425	88.78	926	103.82	624	73.6	464	52.29
27303	RNA binding motif, single stranded interacting protein	13	1.71	0	0	0	0	0	0	0	0	0	0	0	0	0	0	0	0	0	0	0	0	0	0	0	0	0	0	6	0.68
392459	chromosome X open reading frame 25	0	0	10	1.18	16	1.9	0	0	0	0	2	0.23	2	0.36	0	0	0	0	11	1.43	32	4.49	0	0	12	1.35	4	0.47	0	0
25989	unc-51-like kinase 3 (C. elegans)	151	19.89	93	10.94	151	17.91	152	19.07	173	17.45	137	15.95	76	13.62	250	26.17	411	55.15	284	36.87	252	35.39	184	38.44	261	29.26	304	35.86	370	41.7
220064	oral cancer overexpressed 1	41	5.4	13	1.53	22	2.61	29	3.64	70	7.06	20	2.33	15	2.69	65	6.8	38	5.1	28	3.63	23	3.23	17	3.55	31	3.48	37	4.36	45	5.07
11022	tudor and KH domain containing	7	0.92	5	0.59	9	1.07	16	2.01	0	0	8	0.93	5	0.9	10	1.05	2	0.27	7	0.91	9	1.26	9	1.88	22	2.47	6	0.71	11	1.24
220107	deleted in lymphocytic leukemia, 7	0	0	0	0	0	0	0	0	0	0	3	0.35	0	0	0	0	0	0	0	0	0	0	0	0	0	0	0	0	0	0
114879	oxysterol binding protein-like 5	85	11.2	41	4.83	114	13.52	225	28.23	18	1.82	79	9.2	68	12.18	63	6.6	97	13.02	27	3.51	68	9.55	44	9.19	117	13.12	110	12.97	131	14.76
731082	similar to Serine/threonine-protein kinase tousled-like 2 (Tousled-like kinase 2)	0	0	0	0	0	0	0	0	5	0.5	0	0	0	0	0	0	0	0	0	0	2	0.28	0	0	0	0	0	0	0	0
55153	SDA1 domain containing 1	100	13.17	53	6.24	74	8.78	295	37.01	56	5.65	84	9.78	52	9.32	70	7.33	142	19.06	79	10.26	101	14.18	66	13.79	75	8.41	72	8.49	132	14.88
643894	similar to hCG1744064	8	1.05	4	0.47	4	0.47	0	0	16	1.61	2	0.23	0	0	15	1.57	3	0.4	6	0.78	2	0.28	0	0	8	0.9	0	0	0	0
647086	similar to hCG21160	0	0	0	0	0	0	0	0	0	0	0	0	0	0	0	0	0	0	0	0	0	0	0	0	0	0	0	0	2	0.23
54768	hydrocephalus inducing homolog (mouse)	6	0.79	0	0	0	0	14	1.76	0	0	0	0	0	0	0	0	0	0	0	0	0	0	0	0	0	0	0	0	0	0
1984	eukaryotic translation initiation factor 5A	12	1.58	34	4	39	4.63	13	1.63	86	8.67	73	8.5	50	8.96	145	15.18	178	23.89	153	19.86	180	25.28	117	24.44	108	12.11	169	19.93	159	17.92
4728	NADH dehydrogenase (ubiquinone) Fe-S protein 8, 23kDa (NADH-coenzyme Q reductase)	229	30.17	361	42.48	171	20.28	120	15.05	283	28.54	493	57.4	151	27.06	445	46.58	415	55.69	275	35.7	315	44.23	287	59.95	496	55.61	307	36.21	381	42.94
2547	X-ray repair complementing defective repair in Chinese hamster cells 6	8	1.05	57	6.71	29	3.44	39	4.89	3	0.3	115	13.39	121	21.68	0	0	461	61.86	307	39.85	384	53.92	288	60.16	164	18.39	273	32.2	199	22.43
332	baculoviral IAP repeat-containing 5	2	0.26	2	0.24	3	0.36	11	1.38	4	0.4	5	0.58	0	0	11	1.15	0	0	0	0	6	0.84	0	0	0	0	5	0.59	8	0.9
4212	Meis homeobox 2	3	0.4	2	0.24	2	0.24	0	0	3	0.3	0	0	0	0	0	0	0	0	0	0	0	0	0	0	0	0	0	0	0	0
100129186	hypothetical LOC100129186	0	0	0	0	0	0	0	0	0	0	0	0	0	0	6	0.63	0	0	0	0	0	0	2	0.42	0	0	2	0.24	0	0
25829	transmembrane protein 184B	133	17.52	199	23.42	318	37.72	640	80.29	62	6.25	166	19.33	120	21.5	67	7.01	140	18.79	123	15.97	143	20.08	107	22.35	145	16.26	170	20.05	211	23.78
81029	wingless-type MMTV integration site family, member 5B	0	0	0	0	0	0	0	0	0	0	0	0	2	0.36	5	0.52	2	0.27	0	0	4	0.56	2	0.42	0	0	0	0	7	0.79
53842	claudin 22	0	0	2	0.24	0	0	12	1.51	0	0	0	0	0	0	4	0.42	0	0	3	0.39	0	0	0	0	2	0.22	0	0	10	1.13
6275	S100 calcium binding protein A4	2344	308.79	5796	682.11	7810	926.41	1478	185.42	4914	495.53	7133	830.5	3234	579.5	4230	442.82	4587	615.56	3198	415.16	3238	454.71	2378	496.74	6631	743.43	4324	510.03	4216	475.11
51283	bifunctional apoptosis regulator	20	2.63	10	1.18	14	1.66	25	3.14	100	10.08	18	2.1	6	1.08	144	15.07	31	4.16	23	2.99	33	4.63	30	6.27	14	1.57	25	2.95	10	1.13
441518	family with sequence similarity 127, member C	0	0	0	0	0	0	2	0.25	0	0	0	0	0	0	0	0	0	0	0	0	0	0	0	0	5	0.56	0	0	0	0
200424	tet oncogene family member 3	191	25.16	305	35.89	358	42.47	398	49.93	191	19.26	257	29.92	193	34.58	117	12.25	248	33.28	189	24.54	228	32.02	140	29.24	347	38.9	254	29.96	289	32.57
596	B-cell CLL/lymphoma 2	374	49.27	162	19.07	166	19.69	326	40.9	122	12.3	280	32.6	90	16.13	221	23.14	388	52.07	211	27.39	330	46.34	237	49.51	365	40.92	386	45.53	448	50.49
79172	centromere protein O	2	0.26	2	0.24	0	0	6	0.75	0	0	3	0.35	2	0.36	0	0	0	0	2	0.26	0	0	2	0.42	0	0	2	0.24	4	0.45
7408	vasodilator-stimulated phosphoprotein	615	81.02	1403	165.11	1774	210.43	1334	167.36	1142	115.16	1331	154.97	856	153.39	501	52.45	544	73	624	81.01	791	111.08	580	121.16	1202	134.76	1263	148.97	1131	127.45
353238	peptidyl arginine deiminase, type VI	0	0	3	0.35	7	0.83	0	0	0	0	3	0.35	2	0.36	2	0.21	2	0.27	5	0.65	0	0	2	0.42	4	0.45	10	1.18	5	0.56
56947	mitochondrial fission factor	162	21.34	234	27.54	266	31.55	206	25.84	51	5.14	295	34.35	201	36.02	34	3.56	190	25.5	133	17.27	136	19.1	101	21.1	280	31.39	192	22.65	223	25.13
100130846	hypothetical protein LOC100130846	9	1.19	0	0	0	0	0	0	0	0	0	0	0	0	0	0	0	0	0	0	0	0	0	0	0	0	0	0	0	0
100132003	hypothetical protein LOC100132003	3	0.4	0	0	0	0	0	0	0	0	0	0	0	0	0	0	0	0	0	0	0	0	0	0	0	0	3	0.35	0	0
8897	myotubularin related protein 3	212	27.93	583	68.61	698	82.8	481	60.34	1652	166.59	636	74.05	459	82.25	1693	177.23	514	68.98	410	53.23	631	88.61	337	70.4	499	55.95	588	69.36	504	56.8
387254	SLC7A5 pseudogene	15	1.98	0	0	3	0.36	22	2.76	0	0	7	0.82	0	0	0	0	17	2.28	0	0	0	0	2	0.42	0	0	2	0.24	10	1.13
137994	leucine zipper-EF-hand containing transmembrane protein 2	5	0.66	15	1.77	18	2.14	0	0	50	5.04	15	1.75	4	0.72	21	2.2	9	1.21	6	0.78	13	1.83	5	1.04	8	0.9	18	2.12	22	2.48
3702	IL2-inducible T-cell kinase	87	11.46	127	14.95	96	11.39	38	4.77	630	63.53	216	25.15	98	17.56	891	93.27	347	46.57	233	30.25	220	30.89	137	28.62	280	31.39	301	35.5	226	25.47
6764	suppression of tumorigenicity 5	0	0	0	0	0	0	0	0	0	0	0	0	0	0	0	0	2	0.27	0	0	0	0	0	0	0	0	5	0.59	0	0
51	acyl-Coenzyme A oxidase 1, palmitoyl	250	32.93	786	92.5	823	97.62	135	16.94	504	50.82	1102	128.31	964	172.74	519	54.33	339	45.49	344	44.66	386	54.21	224	46.79	893	100.12	669	78.91	426	48.01
259230	sphingomyelin synthase 1	71	9.35	94	11.06	166	19.69	90	11.29	255	25.71	160	18.63	75	13.44	256	26.8	163	21.87	93	12.07	117	16.43	105	21.93	185	20.74	179	21.11	140	15.78
51773	remodeling and spacing factor 1	81	10.67	85	10	115	13.64	200	25.09	68	6.86	82	9.55	54	9.68	43	4.5	111	14.9	63	8.18	85	11.94	48	10.03	85	9.53	68	8.02	87	9.8
2028	glutamyl aminopeptidase (aminopeptidase A)	2	0.26	0	0	0	0	0	0	0	0	0	0	0	0	0	0	0	0	0	0	0	0	0	0	0	0	2	0.24	0	0
8847	deleted in lymphocytic leukemia 2 (non-protein coding)	0	0	14	1.65	14	1.66	5	0.63	27	2.72	26	3.03	9	1.61	24	2.51	19	2.55	14	1.82	15	2.11	7	1.46	17	1.91	12	1.42	14	1.58
80095	zinc finger protein 606	11	1.45	18	2.12	18	2.14	3	0.38	0	0	15	1.75	6	1.08	37	3.87	16	2.15	5	0.65	6	0.84	8	1.67	21	2.35	9	1.06	36	4.06
4059	basal cell adhesion molecule (Lutheran blood group)	0	0	0	0	0	0	0	0	0	0	2	0.23	0	0	0	0	0	0	5	0.65	0	0	0	0	0	0	0	0	0	0
5859	glutaminyl-tRNA synthetase	363	47.82	207	24.36	268	31.79	1172	147.03	475	47.9	315	36.68	126	22.58	1151	120.49	347	46.57	241	31.29	230	32.3	185	38.64	289	32.4	325	38.33	400	45.08
92086	gamma-glutamyltransferase light chain 1	2	0.26	0	0	0	0	0	0	0	0	0	0	0	0	0	0	2	0.27	0	0	0	0	0	0	0	0	0	0	0	0
60496	aminoadipate-semialdehyde dehydrogenase-phosphopantetheinyl transferase	90	11.86	132	15.53	121	14.35	88	11.04	185	18.66	132	15.37	94	16.84	179	18.74	145	19.46	133	17.27	133	18.68	96	20.05	182	20.4	176	20.76	164	18.48
9111	N-myc (and STAT) interactor	422	55.59	1332	156.76	1253	148.63	607	76.15	1034	104.27	1673	194.79	1471	263.59	581	60.82	899	120.64	658	85.42	844	118.52	663	138.5	1558	174.67	1010	119.13	961	108.3
5862	RAB2A, member RAS oncogene family	282	37.15	639	75.2	719	85.29	292	36.63	0	0	614	71.49	399	71.5	0	0	502	67.37	395	51.28	508	71.34	304	63.5	807	90.48	633	74.66	640	72.12
440585	family with sequence similarity 183, member A	0	0	0	0	0	0	0	0	0	0	0	0	0	0	0	0	2	0.27	2	0.26	0	0	0	0	0	0	0	0	0	0
55250	elongation protein 2 homolog (S. cerevisiae)	60	7.9	37	4.35	62	7.35	152	19.07	478	48.2	91	10.6	61	10.93	714	74.74	122	16.37	73	9.48	95	13.34	60	12.53	80	8.97	95	11.21	113	12.73
26227	phosphoglycerate dehydrogenase	2	0.26	0	0	2	0.24	4	0.5	15	1.51	11	1.28	0	0	9	0.94	8	1.07	3	0.39	7	0.98	2	0.42	14	1.57	4	0.47	6	0.68
2056	erythropoietin	0	0	0	0	0	0	4	0.5	4	0.4	0	0	0	0	8	0.84	2	0.27	0	0	0	0	0	0	0	0	0	0	8	0.9
1051	CCAAT/enhancer binding protein (C/EBP), beta	1084	142.8	5952	700.47	6164	731.17	596	74.77	2739	276.2	4991	581.1	2953	529.15	1319	138.08	3110	417.35	2447	317.67	2112	296.58	2212	462.07	4576	513.03	3590	423.45	2580	290.75
11198	suppressor of Ty 16 homolog (S. cerevisiae)	101	13.31	123	14.48	159	18.86	197	24.71	188	18.96	127	14.79	110	19.71	313	32.77	248	33.28	179	23.24	176	24.72	156	32.59	222	24.89	233	27.48	225	25.36
155368	Williams Beuren syndrome chromosome region 27	0	0	0	0	0	0	2	0.25	0	0	0	0	0	0	0	0	0	0	0	0	0	0	0	0	0	0	0	0	0	0
57573	zinc finger protein 471	738	97.22	34	4	29	3.44	82	10.29	0	0	45	5.24	29	5.2	0	0	78	10.47	119	15.45	42	5.9	137	28.62	45	5.05	121	14.27	204	22.99
4256	matrix Gla protein	5	0.66	8	0.94	8	0.95	13	1.63	16	1.61	10	1.16	2	0.36	41	4.29	5	0.67	2	0.26	8	1.12	2	0.42	21	2.35	15	1.77	8	0.9
3660	interferon regulatory factor 2	598	78.78	1058	124.51	1239	146.97	423	53.07	640	64.54	1091	127.03	889	159.3	355	37.16	801	107.49	655	85.03	665	93.38	606	126.59	969	108.64	962	113.47	979	110.33
79850	family with sequence similarity 57, member A	2	0.26	0	0	4	0.47	0	0	0	0	5	0.58	0	0	2	0.21	0	0	4	0.52	3	0.42	0	0	0	0	9	1.06	0	0
8690	jerky homolog-like (mouse)	10	1.32	24	2.82	25	2.97	42	5.27	36	3.63	30	3.49	16	2.87	16	1.67	17	2.28	29	3.76	14	1.97	6	1.25	19	2.13	8	0.94	44	4.96
54986	unc-51-like kinase 4 (C. elegans)	4	0.53	2	0.24	8	0.95	3	0.38	3	0.3	4	0.47	2	0.36	6	0.63	13	1.74	15	1.95	14	1.97	0	0	12	1.35	8	0.94	20	2.25
23613	zinc finger, MYND-type containing 8	50	6.59	73	8.59	87	10.32	59	7.4	157	15.83	122	14.2	57	10.21	73	7.64	176	23.62	124	16.1	131	18.4	81	16.92	86	9.64	123	14.51	131	14.76
1181	chloride channel 2	5	0.66	7	0.82	5	0.59	2	0.25	12	1.21	6	0.7	0	0	3	0.31	14	1.88	4	0.52	17	2.39	14	2.92	11	1.23	10	1.18	5	0.56
84127	RUN domain containing 2A	8	1.05	4	0.47	0	0	7	0.88	0	0	4	0.47	0	0	0	0	4	0.54	5	0.65	0	0	3	0.63	2	0.22	2	0.24	0	0
401236	hypothetical gene supported by AK026805	47	6.19	5	0.59	4	0.47	6	0.75	8	0.81	8	0.93	2	0.36	0	0	8	1.07	2	0.26	0	0	11	2.3	10	1.12	4	0.47	24	2.7
91851	chordin-like 1	0	0	0	0	0	0	0	0	0	0	0	0	0	0	0	0	2	0.27	0	0	0	0	0	0	0	0	3	0.35	0	0
9451	eukaryotic translation initiation factor 2-alpha kinase 3	50	6.59	37	4.35	36	4.27	67	8.41	39	3.93	54	6.29	42	7.53	18	1.88	92	12.35	73	9.48	80	11.23	51	10.65	76	8.52	74	8.73	97	10.93
5197	platelet factor 4 variant 1	56	7.38	61	7.18	36	4.27	40	5.02	1219	122.93	125	14.55	40	7.17	1290	135.04	24	3.22	17	2.21	7	0.98	7	1.46	64	7.18	66	7.78	77	8.68
10495	ecto-NOX disulfide-thiol exchanger 2	80	10.54	25	2.94	31	3.68	47	5.9	0	0	66	7.68	33	5.91	30	3.14	101	13.55	54	7.01	62	8.71	47	9.82	64	7.18	63	7.43	68	7.66
6018	rearranged L-myc fusion	58	7.64	172	20.24	113	13.4	113	14.18	121	12.2	147	17.12	88	15.77	142	14.87	252	33.82	180	23.37	208	29.21	101	21.1	111	12.44	193	22.76	114	12.85
90060	coiled-coil domain containing 120	0	0	0	0	0	0	3	0.38	82	8.27	2	0.23	6	1.08	120	12.56	22	2.95	11	1.43	7	0.98	4	0.84	5	0.56	10	1.18	15	1.69
5563	protein kinase, AMP-activated, alpha 2 catalytic subunit	116	15.28	27	3.18	7	0.83	51	6.4	16	1.61	19	2.21	4	0.72	16	1.67	21	2.82	17	2.21	9	1.26	19	3.97	14	1.57	18	2.12	28	3.16
129607	cytidine monophosphate (UMP-CMP) kinase 2, mitochondrial	22	2.9	33	3.88	38	4.51	15	1.88	89	8.97	44	5.12	41	7.35	48	5.02	112	15.03	43	5.58	91	12.78	206	43.03	39	4.37	50	5.9	22	2.48
112939	BTB (POZ) domain containing 14B	260	34.25	307	36.13	313	37.13	294	36.88	0	0	430	50.06	156	27.95	0	0	269	36.1	185	24.02	225	31.6	163	34.05	376	42.15	269	31.73	362	40.79
50508	NADPH oxidase 3	0	0	9	1.06	6	0.71	0	0	0	0	7	0.82	10	1.79	0	0	14	1.88	13	1.69	20	2.81	11	2.3	5	0.56	10	1.18	11	1.24
728088	similar to ribosomal protein L15	0	0	0	0	0	0	0	0	2	0.2	0	0	0	0	8	0.84	0	0	0	0	0	0	0	0	0	0	0	0	0	0
26100	WD repeat domain, phosphoinositide interacting 2	186	24.5	442	52.02	435	51.6	392	49.18	723	72.91	386	44.94	226	40.5	832	87.1	366	49.12	272	35.31	386	54.21	258	53.89	411	46.08	429	50.6	448	50.49
5570	protein kinase (cAMP-dependent, catalytic) inhibitor beta	2	0.26	0	0	0	0	0	0	10	1.01	3	0.35	5	0.9	9	0.94	0	0	4	0.52	5	0.7	2	0.42	12	1.35	0	0	2	0.23
25927	cannabinoid receptor interacting protein 1	4	0.53	2	0.24	0	0	0	0	0	0	4	0.47	4	0.72	8	0.84	4	0.54	6	0.78	0	0	0	0	0	0	3	0.35	0	0
8273	solute carrier family 10 (sodium/bile acid cotransporter family), member 3	111	14.62	148	17.42	122	14.47	96	12.04	167	16.84	218	25.38	104	18.64	108	11.31	196	26.3	130	16.88	164	23.03	105	21.93	200	22.42	143	16.87	102	11.49
54897	castor zinc finger 1	109	14.36	97	11.42	81	9.61	185	23.21	77	7.76	130	15.14	50	8.96	50	5.23	82	11	38	4.93	60	8.43	67	14	124	13.9	57	6.72	76	8.56
55266	transmembrane protein 19	493	64.95	217	25.54	203	24.08	479	60.09	89	8.97	287	33.42	98	17.56	76	7.96	294	39.45	220	28.56	236	33.14	213	44.49	264	29.6	233	27.48	480	54.09
54816	zinc finger protein 280D	79	10.41	71	8.36	82	9.73	104	13.05	112	11.29	104	12.11	43	7.71	112	11.72	132	17.71	120	15.58	130	18.26	84	17.55	164	18.39	102	12.03	147	16.57
550643	hypothetical LOC550643	37	4.87	23	2.71	42	4.98	45	5.65	81	8.17	52	6.05	43	7.71	58	6.07	114	15.3	55	7.14	60	8.43	41	8.56	77	8.63	84	9.91	103	11.61
6234	ribosomal protein S28	876	115.4	341	40.13	655	77.7	4854	608.95	0	0	567	66.02	274	49.1	0	0	727	97.56	376	48.81	491	68.95	455	95.05	598	67.04	575	67.82	1133	127.68
645422	similar to ribosomal protein L10	10	1.32	3	0.35	0	0	0	0	0	0	0	0	3	0.54	0	0	5	0.67	2	0.26	8	1.12	3	0.63	0	0	2	0.24	2	0.23
23076	ribosomal RNA processing 1 homolog B (S. cerevisiae)	118	15.54	70	8.24	101	11.98	304	38.14	317	31.97	146	17	84	15.05	598	62.6	286	38.38	172	22.33	131	18.4	108	22.56	162	18.16	232	27.37	258	29.07
4712	NADH dehydrogenase (ubiquinone) 1 beta subcomplex, 6, 17kDa	115	15.15	274	32.25	372	44.13	274	34.37	1327	133.82	360	41.91	280	50.17	731	76.52	269	36.1	217	28.17	225	31.6	162	33.84	255	28.59	306	36.09	287	32.34
10749	kinesin family member 1C	15	1.98	38	4.47	32	3.8	16	2.01	126	12.71	42	4.89	24	4.3	120	12.56	28	3.76	34	4.41	46	6.46	37	7.73	67	7.51	38	4.48	52	5.86
2206	membrane-spanning 4-domains, subfamily A, member 2 (Fc fragment of IgE, high affinity I, receptor for; beta polypeptide)	33	4.35	19	2.24	31	3.68	48	6.02	45	4.54	50	5.82	13	2.33	28	2.93	12	1.61	15	1.95	16	2.25	4	0.84	47	5.27	43	5.07	71	8
94134	Rho GTPase activating protein 12	71	9.35	90	10.59	95	11.27	82	10.29	205	20.67	142	16.53	88	15.77	167	17.48	260	34.89	184	23.89	112	15.73	81	16.92	145	16.26	162	19.11	140	15.78
9886	Rho-related BTB domain containing 1	8	1.05	27	3.18	4	0.47	0	0	6	0.61	26	3.03	3	0.54	38	3.98	54	7.25	13	1.69	10	1.4	19	3.97	59	6.61	29	3.42	52	5.86
631	beaded filament structural protein 1, filensin	8	1.05	6	0.71	13	1.54	14	1.76	25	2.52	15	1.75	4	0.72	17	1.78	9	1.21	13	1.69	3	0.42	9	1.88	21	2.35	15	1.77	17	1.92
55596	zinc finger, CCHC domain containing 8	69	9.09	103	12.12	123	14.59	128	16.06	63	6.35	133	15.49	88	15.77	161	16.85	227	30.46	140	18.17	175	24.57	82	17.13	161	18.05	155	18.28	128	14.42
158405	KIAA1958	0	0	0	0	0	0	0	0	0	0	0	0	0	0	0	0	2	0.27	0	0	3	0.42	0	0	0	0	0	0	0	0
10580	sorbin and SH3 domain containing 1	27	3.56	7	0.82	6	0.71	20	2.51	6	0.61	7	0.82	0	0	0	0	8	1.07	7	0.91	5	0.7	7	1.46	19	2.13	10	1.18	20	2.25
81691	exonuclease NEF-sp	0	0	3	0.35	4	0.47	10	1.25	0	0	13	1.51	4	0.72	0	0	3	0.4	7	0.91	6	0.84	2	0.42	10	1.12	3	0.35	10	1.13
222223	KIAA1324-like	7	0.92	4	0.47	6	0.71	0	0	53	5.34	9	1.05	3	0.54	41	4.29	14	1.88	11	1.43	13	1.83	6	1.25	18	2.02	7	0.83	23	2.59
2081	endoplasmic reticulum to nucleus signaling 1	0	0	14	1.65	9	1.07	5	0.63	40	4.03	23	2.68	6	1.08	8	0.84	28	3.76	27	3.51	22	3.09	12	2.51	9	1.01	22	2.59	10	1.13
6293	vacuolar protein sorting 52 homolog (S. cerevisiae)	37	4.87	28	3.3	30	3.56	22	2.76	423	42.66	50	5.82	19	3.4	656	68.67	131	17.58	81	10.52	63	8.85	63	13.16	79	8.86	101	11.91	111	12.51
288	ankyrin 3, node of Ranvier (ankyrin G)	14	1.84	10	1.18	12	1.42	16	2.01	0	0	13	1.51	5	0.9	28	2.93	11	1.48	3	0.39	15	2.11	5	1.04	16	1.79	17	2.01	5	0.56
10153	CCAAT/enhancer binding protein zeta	98	12.91	89	10.47	122	14.47	383	48.05	139	14.02	173	20.14	99	17.74	267	27.95	282	37.84	157	20.38	213	29.91	128	26.74	183	20.52	220	25.95	279	31.44
134187	POU domain class 5, transcription factor 2	4	0.53	0	0	0	0	0	0	0	0	0	0	0	0	0	0	0	0	0	0	0	0	0	0	0	0	0	0	0	0
23139	microtubule associated serine/threonine kinase 2	7	0.92	14	1.65	12	1.42	0	0	37	3.73	14	1.63	7	1.25	14	1.47	32	4.29	25	3.25	17	2.39	14	2.92	13	1.46	15	1.77	8	0.9
642938	chromosome 10 open reading frame 141	0	0	0	0	0	0	0	0	0	0	0	0	0	0	0	0	2	0.27	0	0	2	0.28	0	0	0	0	0	0	0	0
64772	endo-beta-N-acetylglucosaminidase	90	11.86	81	9.53	100	11.86	300	37.64	58	5.85	174	20.26	105	18.81	79	8.27	155	20.8	97	12.59	153	21.49	101	21.1	136	15.25	138	16.28	213	24
6005	Rh-associated glycoprotein	6	0.79	0	0	0	0	0	0	0	0	0	0	0	0	0	0	0	0	3	0.39	6	0.84	0	0	0	0	2	0.24	0	0
4605	v-myb myeloblastosis viral oncogene homolog (avian)-like 2	3	0.4	5	0.59	4	0.47	5	0.63	21	2.12	8	0.93	3	0.54	14	1.47	3	0.4	0	0	0	0	0	0	2	0.22	15	1.77	10	1.13
2237	flap structure-specific endonuclease 1	34	4.48	26	3.06	14	1.66	116	14.55	15	1.51	19	2.21	8	1.43	17	1.78	16	2.15	24	3.12	25	3.51	26	5.43	34	3.81	18	2.12	40	4.51
65082	vacuolar protein sorting 33 homolog A (S. cerevisiae)	49	6.46	56	6.59	45	5.34	49	6.15	8	0.81	67	7.8	43	7.71	13	1.36	112	15.03	91	11.81	73	10.25	62	12.95	78	8.74	80	9.44	77	8.68
2995	glycophorin C (Gerbich blood group)	76	10.01	390	45.9	406	48.16	124	15.56	943	95.09	282	32.83	379	67.91	1088	113.9	167	22.41	979	127.09	614	86.22	165	34.47	403	45.18	474	55.91	209	23.55
100131655	hypothetical LOC100131655	0	0	0	0	0	0	0	0	0	0	0	0	0	0	5	0.52	0	0	0	0	0	0	0	0	0	0	0	0	0	0
647979	hypothetical protein LOC647979	30	3.95	31	3.65	24	2.85	19	2.38	11	1.11	35	4.08	22	3.94	6	0.63	50	6.71	14	1.82	38	5.34	31	6.48	41	4.6	41	4.84	7	0.79
100131998	hypothetical protein LOC100131998	57	7.51	11	1.29	20	2.37	32	4.01	0	0	14	1.63	4	0.72	0	0	8	1.07	14	1.82	11	1.54	15	3.13	17	1.91	13	1.53	79	8.9
100134287	hypothetical protein LOC100134287	5	0.66	0	0	0	0	0	0	2	0.2	0	0	0	0	7	0.73	3	0.4	0	0	0	0	0	0	0	0	0	0	0	0
100131816	ubiquitin-conjugating enzyme E2D N-terminal like pseudogene	0	0	0	0	0	0	0	0	6	0.61	0	0	0	0	0	0	0	0	0	0	0	0	0	0	0	0	0	0	0	0
170691	ADAM metallopeptidase with thrombospondin type 1 motif, 17	3	0.4	0	0	0	0	0	0	70	7.06	6	0.7	0	0	29	3.04	8	1.07	0	0	4	0.56	0	0	10	1.12	2	0.24	3	0.34
100130950	similar to hCG1991536	0	0	0	0	0	0	0	0	0	0	0	0	0	0	0	0	0	0	2	0.26	0	0	0	0	0	0	0	0	0	0
84928	transmembrane protein 209	44	5.8	69	8.12	56	6.64	8	1	66	6.66	113	13.16	57	10.21	51	5.34	121	16.24	88	11.42	61	8.57	37	7.73	168	18.84	82	9.67	75	8.45
9094	unc-119 homolog (C. elegans)	224	29.51	819	96.39	860	102.01	346	43.41	734	74.02	796	92.68	449	80.46	571	59.77	515	69.11	400	51.93	466	65.44	354	73.95	842	94.4	602	71.01	446	50.26
84570	collagen, type XXV, alpha 1	0	0	0	0	0	0	0	0	0	0	0	0	0	0	0	0	0	0	0	0	0	0	0	0	0	0	0	0	7	0.79
3384	intercellular adhesion molecule 2	57	7.51	78	9.18	70	8.3	192	24.09	273	27.53	136	15.83	74	13.26	649	67.94	154	20.67	124	16.1	124	17.41	126	26.32	172	19.28	171	20.17	230	25.92
100129950	similar to UCA1 protein	0	0	0	0	0	0	0	0	0	0	0	0	0	0	0	0	0	0	0	0	0	0	0	0	0	0	0	0	10	1.13
2247	fibroblast growth factor 2 (basic)	10	1.32	2	0.24	0	0	0	0	11	1.11	6	0.7	0	0	4	0.42	6	0.81	7	0.91	8	1.12	0	0	0	0	2	0.24	0	0
94235	guanine nucleotide binding protein (G protein), gamma 8	5	0.66	6	0.71	0	0	0	0	0	0	9	1.05	4	0.72	0	0	8	1.07	6	0.78	8	1.12	0	0	13	1.46	14	1.65	21	2.37
100129079	hypothetical protein LOC100129079	19	2.5	21	2.47	9	1.07	11	1.38	7	0.71	24	2.79	21	3.76	31	3.25	20	2.68	11	1.43	34	4.77	14	2.92	29	3.25	27	3.18	18	2.03
80022	myosin XVB pseudogene	0	0	0	0	0	0	0	0	5	0.5	4	0.47	0	0	3	0.31	3	0.4	0	0	0	0	2	0.42	2	0.22	0	0	0	0
4915	neurotrophic tyrosine kinase, receptor, type 2	17	2.24	3	0.35	2	0.24	8	1	0	0	0	0	0	0	2	0.21	6	0.81	0	0	2	0.28	0	0	2	0.22	2	0.24	7	0.79
286676	immunoglobulin-like domain containing receptor 1	2	0.26	0	0	4	0.47	0	0	48	4.84	0	0	0	0	36	3.77	0	0	0	0	0	0	0	0	4	0.45	2	0.24	7	0.79
23232	TBC1 domain family, member 12	25	3.29	16	1.88	16	1.9	21	2.63	20	2.02	37	4.31	10	1.79	8	0.84	49	6.58	62	8.05	55	7.72	43	8.98	48	5.38	53	6.25	71	8
3805	killer cell immunoglobulin-like receptor, two domains, long cytoplasmic tail, 4	0	0	0	0	0	0	0	0	0	0	2	0.23	0	0	0	0	0	0	0	0	0	0	0	0	7	0.78	0	0	0	0
100128062	solute carrier family 2 (facilitated glucose transporter), member 3 pseudogene 1	209	27.53	94	11.06	117	13.88	293	36.76	127	12.81	153	17.81	76	13.62	167	17.48	272	36.5	167	21.68	226	31.74	156	32.59	162	18.16	203	23.94	229	25.81
10961	endoplasmic reticulum protein 29	240	31.62	330	38.84	337	39.97	229	28.73	794	80.07	463	53.91	255	45.69	1440	150.75	582	78.1	401	52.06	468	65.72	365	76.25	523	58.64	490	57.8	485	54.66
8613	phosphatidic acid phosphatase type 2B	0	0	0	0	2	0.24	0	0	0	0	4	0.47	0	0	0	0	6	0.81	0	0	0	0	2	0.42	0	0	2	0.24	0	0
84636	G protein-coupled receptor 174	2	0.26	0	0	0	0	4	0.5	0	0	3	0.35	0	0	0	0	4	0.54	10	1.3	6	0.84	6	1.25	5	0.56	22	2.59	15	1.69
80218	N-acetyltransferase 13	100	13.17	408	48.02	434	51.48	124	15.56	316	31.87	506	58.91	348	62.36	188	19.68	594	79.71	455	59.07	575	80.75	351	73.32	464	52.02	505	59.57	570	64.23
5754	PTK7 protein tyrosine kinase 7	0	0	3	0.35	2	0.24	8	1	0	0	2	0.23	2	0.36	2	0.21	2	0.27	2	0.26	2	0.28	0	0	0	0	4	0.47	4	0.45
652966	small nucleolar RNA, C/D box 10	12	1.58	3	0.35	0	0	14	1.76	3	0.3	5	0.58	2	0.36	0	0	15	2.01	2	0.26	6	0.84	2	0.42	8	0.9	5	0.59	0	0
100129400	hypothetical protein LOC100129400	0	0	0	0	0	0	4	0.5	0	0	0	0	0	0	0	0	0	0	0	0	0	0	0	0	0	0	0	0	0	0
7553	zinc finger protein 7	43	5.66	55	6.47	42	4.98	47	5.9	17	1.71	74	8.62	34	6.09	34	3.56	66	8.86	58	7.53	59	8.29	51	10.65	101	11.32	67	7.9	89	10.03
23585	transmembrane protein 50A	1031	135.82	2111	248.44	1945	230.71	676	84.81	1003	101.14	2350	273.61	1308	234.38	793	83.01	1588	213.1	1149	149.16	1110	155.88	718	149.98	2301	257.97	1561	184.12	1456	164.08
221120	alkB, alkylation repair homolog 3 (E. coli)	9	1.19	4	0.47	14	1.66	2	0.25	49	4.94	14	1.63	6	1.08	44	4.61	25	3.35	15	1.95	15	2.11	16	3.34	20	2.24	27	3.18	8	0.9
81031	solute carrier family 2 (facilitated glucose transporter), member 10	11	1.45	0	0	0	0	4	0.5	0	0	0	0	0	0	0	0	0	0	0	0	0	0	0	0	0	0	0	0	0	0
79446	WD repeat domain 25	6	0.79	7	0.82	11	1.3	2	0.25	70	7.06	9	1.05	15	2.69	67	7.01	21	2.82	14	1.82	18	2.53	16	3.34	3	0.34	3	0.35	24	2.7
677849	small nucleolar RNA, C/D box 1B	0	0	0	0	0	0	0	0	0	0	0	0	0	0	0	0	0	0	0	0	0	0	0	0	0	0	2	0.24	0	0
57226	LYR motif containing 2	84	11.07	34	4	31	3.68	46	5.77	75	7.56	45	5.24	25	4.48	100	10.47	39	5.23	41	5.32	26	3.65	32	6.68	45	5.05	34	4.01	49	5.52
2268	Gardner-Rasheed feline sarcoma viral (v-fgr) oncogene homolog	960	126.47	3054	359.41	2880	341.62	1360	170.62	4922	496.34	2489	289.79	2068	370.57	5285	553.26	2625	352.27	2192	284.56	2493	350.09	2094	437.42	2361	264.7	2641	311.51	2190	246.8
200420	Alstrom syndrome 1 pseudogene	0	0	0	0	0	0	0	0	0	0	0	0	0	0	0	0	0	0	0	0	0	0	0	0	0	0	2	0.24	0	0
84163	GTF2I repeat domain containing 2	15	1.98	9	1.06	7	0.83	20	2.51	13	1.31	12	1.4	7	1.25	2	0.21	8	1.07	10	1.3	2	0.28	5	1.04	7	0.78	23	2.71	23	2.59
7153	topoisomerase (DNA) II alpha 170kDa	56	7.38	27	3.18	24	2.85	40	5.02	0	0	20	2.33	7	1.25	5	0.52	19	2.55	5	0.65	11	1.54	7	1.46	22	2.47	24	2.83	15	1.69
517	ATP synthase, H+ transporting, mitochondrial F0 complex, subunit C2 (subunit 9)	348	45.84	401	47.19	511	60.61	418	52.44	0	0	695	80.92	404	72.39	9	0.94	784	105.21	665	86.33	561	78.78	578	120.74	750	84.09	628	74.07	832	93.76
22839	discs, large (Drosophila) homolog-associated protein 4	214	28.19	457	53.78	391	46.38	218	27.35	123	12.4	555	64.62	289	51.79	69	7.22	286	38.38	251	32.58	236	33.14	179	37.39	546	61.21	406	47.89	282	31.78
114130	hypothetical protein MGC16384	7	0.92	0	0	0	0	0	0	0	0	0	0	0	0	0	0	2	0.27	0	0	0	0	2	0.42	0	0	0	0	4	0.45
727798	hypothetical LOC727798	0	0	0	0	2	0.24	0	0	13	1.31	2	0.23	0	0	0	0	3	0.4	0	0	0	0	0	0	0	0	2	0.24	0	0
23258	DENN/MADD domain containing 5A	404	53.22	1687	198.54	1727	204.86	257	32.24	1055	106.39	1431	166.61	870	155.9	372	38.94	704	94.47	579	75.16	788	110.66	560	116.98	1566	175.57	1224	144.37	782	88.13
56344	calcium binding protein 5	90	11.86	11	1.29	6	0.71	29	3.64	11	1.11	41	4.77	7	1.25	18	1.88	38	5.1	13	1.69	14	1.97	23	4.8	23	2.58	23	2.71	11	1.24
10138	YY1 associated factor 2	101	13.31	170	20.01	164	19.45	119	14.93	104	10.49	172	20.03	110	19.71	78	8.17	179	24.02	110	14.28	124	17.41	88	18.38	272	30.5	178	21	154	17.35
114821	SCAN domain containing 3	0	0	0	0	0	0	0	0	0	0	2	0.23	0	0	0	0	0	0	0	0	0	0	0	0	0	0	0	0	0	0
6837	mediator complex subunit 22	59	7.77	113	13.3	104	12.34	17	2.13	69	6.96	138	16.07	94	16.84	118	12.35	77	10.33	61	7.92	73	10.25	48	10.03	141	15.81	109	12.86	84	9.47
644890	meiosis expressed gene 1 homolog (mouse)	0	0	0	0	0	0	0	0	0	0	0	0	0	0	0	0	2	0.27	2	0.26	0	0	0	0	0	0	2	0.24	7	0.79
57466	splicing factor, arginine/serine-rich 15	63	8.3	48	5.65	78	9.25	82	10.29	56	5.65	66	7.68	26	4.66	62	6.49	60	8.05	41	5.32	43	6.04	38	7.94	46	5.16	87	10.26	99	11.16
645430	hypothetical LOC645430	6	0.79	0	0	0	0	0	0	0	0	0	0	0	0	0	0	0	0	0	0	0	0	0	0	0	0	0	0	0	0
2643	GTP cyclohydrolase 1	157	20.68	161	18.95	164	19.45	375	47.05	205	20.67	254	29.57	182	32.61	276	28.89	393	52.74	233	30.25	353	49.57	319	66.64	249	27.92	219	25.83	298	33.58
753	chromosome 18 open reading frame 1	65	8.56	67	7.89	80	9.49	110	13.8	37	3.73	93	10.83	57	10.21	32	3.35	84	11.27	84	10.9	86	12.08	67	14	86	9.64	91	10.73	76	8.56
344167	Putative forkhead box protein ENSP00000381211	3	0.4	0	0	0	0	0	0	0	0	0	0	0	0	0	0	0	0	0	0	0	0	0	0	0	0	0	0	0	0
5991	regulatory factor X, 3 (influences HLA class II expression)	11	1.45	16	1.88	13	1.54	17	2.13	44	4.44	15	1.75	12	2.15	14	1.47	17	2.28	16	2.08	17	2.39	4	0.84	35	3.92	14	1.65	28	3.16
56242	zinc finger protein 253	12	1.58	2	0.24	7	0.83	17	2.13	0	0	11	1.28	3	0.54	0	0	10	1.34	4	0.52	7	0.98	11	2.3	4	0.45	8	0.94	6	0.68
4144	methionine adenosyltransferase II, alpha	371	48.87	367	43.19	323	38.31	725	90.95	2624	264.61	543	63.22	324	58.06	3171	331.96	1134	152.18	752	97.62	701	98.44	709	148.1	536	60.09	734	86.58	994	112.02
10447	family with sequence similarity 3, member C	253	33.33	144	16.95	149	17.67	289	36.26	93	9.38	171	19.91	95	17.02	121	12.67	317	42.54	239	31.03	261	36.65	194	40.52	342	38.34	201	23.71	315	35.5
100128813	hypothetical protein LOC100128813	0	0	0	0	3	0.36	0	0	0	0	0	0	0	0	0	0	2	0.27	0	0	2	0.28	0	0	0	0	0	0	0	0
91875	tetratricopeptide repeat domain 5	19	2.5	11	1.29	22	2.61	42	5.27	12	1.21	16	1.86	11	1.97	20	2.09	28	3.76	28	3.63	14	1.97	18	3.76	23	2.58	16	1.89	25	2.82
6688	spleen focus forming virus (SFFV) proviral integration oncogene spi1	1559	205.38	4277	503.35	5811	689.29	2320	291.05	6609	666.46	4921	572.95	3465	620.89	4611	482.7	2818	378.17	1836	238.35	3977	558.48	2030	424.05	3597	403.27	4722	556.97	2846	320.72
654346	lectin, galactoside-binding, soluble, 9C	0	0	2	0.24	0	0	0	0	0	0	3	0.35	2	0.36	0	0	5	0.67	12	1.56	11	1.54	5	1.04	9	1.01	2	0.24	9	1.01
1678	translocase of inner mitochondrial membrane 8 homolog A (yeast)	9	1.19	6	0.71	5	0.59	0	0	31	3.13	3	0.35	4	0.72	41	4.29	6	0.81	13	1.69	10	1.4	3	0.63	0	0	3	0.35	14	1.58
400506	chromosome 16 open reading frame 88	18	2.37	3	0.35	11	1.3	28	3.51	7	0.71	5	0.58	5	0.9	11	1.15	43	5.77	41	5.32	32	4.49	32	6.68	11	1.23	18	2.12	37	4.17
7851	mal, T-cell differentiation protein-like	0	0	0	0	0	0	0	0	0	0	0	0	0	0	0	0	0	0	0	0	0	0	0	0	0	0	5	0.59	0	0
10149	G protein-coupled receptor 64	0	0	3	0.35	0	0	6	0.75	0	0	0	0	0	0	0	0	0	0	0	0	0	0	0	0	0	0	0	0	0	0
5717	proteasome (prosome, macropain) 26S subunit, non-ATPase, 11	66	8.69	60	7.06	70	8.3	183	22.96	231	23.29	79	9.2	41	7.35	322	33.71	117	15.7	60	7.79	83	11.66	73	15.25	85	9.53	66	7.78	49	5.52
5071	Parkinson disease (autosomal recessive, juvenile) 2, parkin	0	0	0	0	0	0	0	0	6	0.61	0	0	0	0	0	0	4	0.54	0	0	0	0	0	0	3	0.34	0	0	0	0
23587	chromosome 17 open reading frame 81	161	21.21	137	16.12	147	17.44	192	24.09	79	7.97	199	23.17	104	18.64	102	10.68	281	37.71	150	19.47	134	18.82	127	26.53	269	30.16	211	24.89	231	26.03
143496	olfactory receptor, family 52, subfamily B, member 4	3	0.4	2	0.24	2	0.24	6	0.75	0	0	6	0.7	0	0	0	0	2	0.27	2	0.26	0	0	3	0.63	2	0.22	5	0.59	7	0.79
50937	Cdon homolog (mouse)	2	0.26	3	0.35	4	0.47	2	0.25	3	0.3	6	0.7	5	0.9	0	0	14	1.88	19	2.47	8	1.12	7	1.46	3	0.34	5	0.59	10	1.13
83604	transmembrane protein 47	0	0	0	0	0	0	0	0	0	0	0	0	0	0	0	0	0	0	0	0	0	0	0	0	6	0.67	0	0	0	0
100129895	hypothetical protein LOC100129895	15	1.98	5	0.59	17	2.02	12	1.51	411	41.45	14	1.63	4	0.72	509	53.28	11	1.48	3	0.39	0	0	7	1.46	10	1.12	14	1.65	7	0.79
283869	neuropeptide W	0	0	0	0	0	0	0	0	0	0	0	0	0	0	2	0.21	0	0	0	0	0	0	0	0	0	0	0	0	0	0
643641	zinc finger protein 862	65	8.56	131	15.42	88	10.44	121	15.18	77	7.76	213	24.8	80	14.34	92	9.63	152	20.4	100	12.98	135	18.96	88	18.38	172	19.28	155	18.28	96	10.82
112849	chromosome 14 open reading frame 149	52	6.85	26	3.06	45	5.34	235	29.48	7	0.71	25	2.91	9	1.61	6	0.63	51	6.84	21	2.73	19	2.67	9	1.88	20	2.24	33	3.89	75	8.45
84875	poly (ADP-ribose) polymerase family, member 10	64	8.43	96	11.3	170	20.17	196	24.59	359	36.2	157	18.28	123	22.04	644	67.42	224	30.06	77	10	361	50.69	146	30.5	101	11.32	190	22.41	99	11.16
6281	S100 calcium binding protein A10	451	59.41	288	33.89	336	39.86	1604	201.23	3146	317.25	430	50.06	152	27.24	5581	584.25	450	60.39	368	47.77	359	50.41	333	69.56	437	48.99	403	47.54	559	62.99
255374	similar to hypothetical protein MGC49416	71	9.35	8	0.94	7	0.83	77	9.66	17	1.71	18	2.1	4	0.72	32	3.35	19	2.55	10	1.3	11	1.54	8	1.67	11	1.23	10	1.18	26	2.93
286075	zinc finger protein 707	20	2.63	10	1.18	16	1.9	66	8.28	5	0.5	13	1.51	7	1.25	0	0	16	2.15	8	1.04	14	1.97	10	2.09	15	1.68	26	3.07	24	2.7
100129933	similar to hCG1729961	0	0	0	0	0	0	0	0	0	0	0	0	0	0	6	0.63	0	0	0	0	0	0	0	0	0	0	0	0	0	0
944	tumor necrosis factor (ligand) superfamily, member 8	13	1.71	36	4.24	25	2.97	23	2.89	16	1.61	66	7.68	73	13.08	11	1.15	140	18.79	87	11.29	148	20.78	140	29.24	52	5.83	88	10.38	87	9.8
55739	carbohydrate kinase domain containing	131	17.26	79	9.3	121	14.35	465	58.34	161	16.24	106	12.34	68	12.18	221	23.14	268	35.96	140	18.17	147	20.64	86	17.96	191	21.41	166	19.58	227	25.58
100128726	hypothetical protein LOC100128726	0	0	0	0	2	0.24	0	0	0	0	0	0	0	0	12	1.26	3	0.4	0	0	0	0	0	0	0	0	2	0.24	0	0
55958	kelch-like 9 (Drosophila)	517	68.11	300	35.31	475	56.34	550	69	128	12.91	482	56.12	336	60.21	366	38.31	611	81.99	489	63.48	453	63.61	382	79.8	372	41.71	436	51.43	736	82.94
81562	lectin, mannose-binding 2-like	12	1.58	16	1.88	21	2.49	11	1.38	41	4.13	17	1.98	15	2.69	28	2.93	38	5.1	37	4.8	24	3.37	28	5.85	31	3.48	9	1.06	45	5.07
151313	fumarylacetoacetate hydrolase domain containing 2B	0	0	0	0	0	0	0	0	0	0	0	0	0	0	0	0	2	0.27	0	0	0	0	0	0	4	0.45	3	0.35	5	0.56
26212	olfactory receptor, family 2, subfamily B, member 6	0	0	0	0	0	0	0	0	0	0	0	0	0	0	0	0	0	0	0	0	0	0	0	0	2	0.22	2	0.24	0	0
138240	chromosome 9 open reading frame 57	10	1.32	0	0	0	0	4	0.5	0	0	0	0	0	0	0	0	0	0	0	0	0	0	0	0	0	0	0	0	3	0.34
84919	protein phosphatase 1, regulatory (inhibitor) subunit 15B	372	49.01	805	94.74	781	92.64	238	29.86	3171	319.77	1159	134.94	665	119.16	1596	167.08	1118	150.03	623	80.88	865	121.47	520	108.62	834	93.5	947	111.7	666	75.05
2117	ets variant gene 3	0	0	0	0	2	0.24	0	0	10	1.01	4	0.47	0	0	3	0.31	4	0.54	3	0.39	0	0	0	0	0	0	0	0	11	1.24
127703	chromosome 1 open reading frame 216	20	2.63	24	2.82	28	3.32	98	12.29	41	4.13	22	2.56	22	3.94	58	6.07	82	11	52	6.75	64	8.99	29	6.06	29	3.25	63	7.43	100	11.27
29894	cleavage and polyadenylation specific factor 1, 160kDa	224	29.51	235	27.66	256	30.37	338	42.4	322	32.47	179	20.84	110	19.71	407	42.61	263	35.29	201	26.09	266	37.35	192	40.11	137	15.36	146	17.22	156	17.58
23394	activity-dependent neuroprotector homeobox	136	17.92	221	26.01	256	30.37	223	27.98	500	50.42	259	30.16	159	28.49	693	72.55	420	56.36	204	26.48	249	34.97	181	37.81	296	33.19	296	34.91	273	30.76
100128881	similar to predicted protein	0	0	0	0	0	0	0	0	5	0.5	0	0	0	0	0	0	0	0	0	0	0	0	0	0	0	0	0	0	0	0
83448	pseudouridylate synthase 7 homolog (S. cerevisiae)-like	7	0.92	5	0.59	7	0.83	5	0.63	5	0.5	3	0.35	9	1.61	8	0.84	0	0	10	1.3	4	0.56	4	0.84	3	0.34	5	0.59	17	1.92
4986	opioid receptor, kappa 1	2	0.26	0	0	0	0	3	0.38	0	0	0	0	0	0	0	0	0	0	0	0	0	0	0	0	0	0	0	0	0	0
158787	RIB43A domain with coiled-coils 1	0	0	2	0.24	0	0	0	0	4	0.4	3	0.35	0	0	3	0.31	0	0	0	0	0	0	0	0	3	0.34	0	0	4	0.45
474344	GTPase, IMAP family member 6	456	60.07	457	53.78	434	51.48	521	65.36	664	66.96	618	71.95	468	83.86	1633	170.95	806	108.16	559	72.57	388	54.49	329	68.73	821	92.05	693	81.74	758	85.42
140862	chromosome 20 open reading frame 82	0	0	0	0	0	0	3	0.38	45	4.54	2	0.23	2	0.36	10	1.05	4	0.54	4	0.52	5	0.7	2	0.42	3	0.34	0	0	2	0.23
6605	SWI/SNF related, matrix associated, actin dependent regulator of chromatin, subfamily e, member 1	155	20.42	182	21.42	195	23.13	208	26.09	519	52.34	176	20.49	116	20.79	1264	132.32	231	31	167	21.68	144	20.22	128	26.74	272	30.5	204	24.06	237	26.71
130752	malate dehydrogenase 1B, NAD (soluble)	0	0	0	0	0	0	0	0	0	0	0	0	2	0.36	0	0	0	0	0	0	0	0	0	0	0	0	0	0	0	0
100130653	SFVP2550	0	0	0	0	0	0	2	0.25	0	0	0	0	0	0	0	0	0	0	0	0	0	0	0	0	0	0	0	0	0	0
389337	FLJ41603 protein	19	2.5	0	0	0	0	0	0	0	0	0	0	0	0	0	0	0	0	0	0	0	0	0	0	0	0	4	0.47	0	0
51631	LUC7-like 2 (S. cerevisiae)	1501	197.74	1205	141.81	1246	147.8	1102	138.25	460	46.39	1605	186.87	871	156.07	432	45.22	1533	205.72	852	110.61	1362	191.26	906	189.26	1674	187.68	1625	191.67	2417	272.38
574028	chronic lymphocytic leukemia up-regulated 1	0	0	0	0	0	0	0	0	0	0	2	0.23	0	0	0	0	0	0	0	0	0	0	0	0	0	0	0	0	0	0
2810	stratifin	14	1.84	56	6.59	11	1.3	18	2.26	110	11.09	88	10.25	22	3.94	84	8.79	18	2.42	23	2.99	34	4.77	13	2.72	56	6.28	42	4.95	31	3.49
729806	similar to hCG1725380	52	6.85	58	6.83	65	7.71	21	2.63	32	3.23	56	6.52	28	5.02	36	3.77	86	11.54	53	6.88	51	7.16	39	8.15	47	5.27	59	6.96	112	12.62
149111	cornichon homolog 3 (Drosophila)	0	0	0	0	0	0	0	0	0	0	0	0	0	0	3	0.31	2	0.27	2	0.26	0	0	0	0	2	0.22	0	0	0	0
51260	chromosome X open reading frame 26	100	13.17	71	8.36	74	8.78	40	5.02	17	1.71	132	15.37	64	11.47	53	5.55	148	19.86	96	12.46	100	14.04	55	11.49	136	15.25	130	15.33	113	12.73
100134231	hypothetical protein LOC100134231	0	0	0	0	0	0	0	0	0	0	0	0	0	0	0	0	0	0	2	0.26	0	0	0	0	0	0	0	0	0	0
153364	similar to metallo-beta-lactamase superfamily protein	33	4.35	30	3.53	28	3.32	30	3.76	12	1.21	33	3.84	20	3.58	0	0	43	5.77	35	4.54	23	3.23	36	7.52	32	3.59	33	3.89	32	3.61
689	basic transcription factor 3	602	79.31	793	93.33	842	99.88	388	48.68	2220	223.87	1140	132.73	602	107.87	2773	290.29	849	113.93	875	113.59	804	112.9	615	128.47	1012	113.46	902	106.39	917	103.34
6434	splicing factor, arginine/serine-rich 10 (transformer 2 homolog, Drosophila)	675	88.92	546	64.26	526	62.39	1590	199.47	751	75.73	734	85.46	401	71.86	633	66.27	1161	155.8	658	85.42	581	81.59	522	109.04	873	97.88	766	90.35	1257	141.65
55254	transmembrane protein 39A	48	6.32	81	9.53	91	10.79	96	12.04	63	6.35	120	13.97	77	13.8	153	16.02	186	24.96	134	17.4	128	17.97	87	18.17	101	11.32	134	15.81	96	10.82
51061	thioredoxin domain containing 11	108	14.23	103	12.12	143	16.96	288	36.13	145	14.62	101	11.76	71	12.72	127	13.29	167	22.41	115	14.93	149	20.92	99	20.68	168	18.84	187	22.06	216	24.34
10236	heterogeneous nuclear ribonucleoprotein R	690	90.9	462	54.37	574	68.09	1516	190.19	157	15.83	728	84.76	349	62.54	113	11.83	517	69.38	338	43.88	449	63.05	277	57.86	789	88.46	592	69.83	664	74.83
344807	CD200 cell surface glycoprotein receptor 2	0	0	0	0	0	0	0	0	0	0	2	0.23	0	0	5	0.52	2	0.27	0	0	0	0	0	0	0	0	0	0	0	0
199720	gametogenetin	0	0	0	0	0	0	4	0.5	0	0	2	0.23	0	0	0	0	3	0.4	0	0	0	0	0	0	0	0	0	0	2	0.23
650901	hypothetical LOC650901	0	0	0	0	0	0	0	0	0	0	0	0	0	0	0	0	0	0	0	0	0	0	0	0	0	0	2	0.24	0	0
55070	de-etiolated homolog 1 (Arabidopsis)	0	0	0	0	0	0	6	0.75	6	0.61	0	0	2	0.36	3	0.31	3	0.4	5	0.65	0	0	4	0.84	0	0	2	0.24	8	0.9
55668	chromosome 14 open reading frame 118	0	0	5	0.59	9	1.07	3	0.38	22	2.22	10	1.16	11	1.97	11	1.15	7	0.94	17	2.21	3	0.42	17	3.55	14	1.57	25	2.95	9	1.01
3200	homeobox A3	0	0	0	0	0	0	7	0.88	0	0	0	0	0	0	0	0	0	0	0	0	0	0	0	0	0	0	0	0	0	0
283726	family with sequence similarity 154, member B	7	0.92	0	0	0	0	4	0.5	0	0	0	0	0	0	0	0	3	0.4	0	0	0	0	2	0.42	13	1.46	4	0.47	10	1.13
54861	SNF related kinase	144	18.97	593	69.79	660	78.29	112	14.05	811	81.78	465	54.14	340	60.92	496	51.92	519	69.65	394	51.15	477	66.98	310	64.76	606	67.94	530	62.52	426	48.01
23331	tetratricopeptide repeat domain 28	30	3.95	4	0.47	0	0	42	5.27	10	1.01	0	0	0	0	0	0	10	1.34	3	0.39	0	0	3	0.63	0	0	7	0.83	8	0.9
22934	ribose 5-phosphate isomerase A	458	60.34	304	35.78	323	38.31	998	125.2	61	6.15	339	39.47	167	29.92	169	17.69	218	29.25	169	21.94	224	31.46	168	35.09	411	46.08	273	32.2	451	50.82
100133898	similar to anaphase promoting complex subunit 1	2	0.26	0	0	0	0	0	0	0	0	0	0	0	0	0	0	0	0	0	0	0	0	0	0	0	0	4	0.47	0	0
140432	ring finger protein 113B	68	8.96	2	0.24	2	0.24	20	2.51	0	0	2	0.23	0	0	0	0	12	1.61	16	2.08	0	0	12	2.51	4	0.45	2	0.24	24	2.7
79857	hypothetical protein FLJ13224	0	0	0	0	0	0	0	0	0	0	0	0	0	0	3	0.31	0	0	0	0	0	0	0	0	0	0	0	0	0	0
84259	DCN1, defective in cullin neddylation 1, domain containing 5 (S. cerevisiae)	37	4.87	31	3.65	58	6.88	35	4.39	84	8.47	56	6.52	33	5.91	92	9.63	75	10.06	58	7.53	67	9.41	48	10.03	64	7.18	53	6.25	65	7.32
23248	regulation of nuclear pre-mRNA domain containing 2	117	15.41	133	15.65	126	14.95	215	26.97	175	17.65	218	25.38	64	11.47	131	13.71	205	27.51	163	21.16	173	24.29	144	30.08	213	23.88	197	23.24	257	28.96
100131261	similar to hCG1728885	0	0	0	0	0	0	0	0	0	0	0	0	2	0.36	0	0	0	0	0	0	0	0	0	0	0	0	0	0	0	0
53343	nudix (nucleoside diphosphate linked moiety X)-type motif 9	16	2.11	19	2.24	14	1.66	15	1.88	60	6.05	35	4.08	20	3.58	82	8.58	47	6.31	46	5.97	44	6.18	19	3.97	69	7.74	52	6.13	53	5.97
143662	mucin 15, cell surface associated	2	0.26	0	0	0	0	0	0	0	0	0	0	0	0	0	0	0	0	0	0	0	0	0	0	0	0	0	0	0	0
84302	chromosome 9 open reading frame 125	0	0	0	0	0	0	0	0	0	0	0	0	0	0	4	0.42	0	0	0	0	0	0	0	0	0	0	0	0	0	0
64598	motile sperm domain containing 3	28	3.69	34	4	36	4.27	16	2.01	27	2.72	35	4.08	18	3.23	53	5.55	59	7.92	29	3.76	41	5.76	23	4.8	72	8.07	51	6.02	27	3.04
79230	zinc finger protein 557	360	47.43	63	7.41	50	5.93	156	19.57	272	27.43	48	5.59	26	4.66	251	26.28	51	6.84	46	5.97	47	6.6	63	13.16	61	6.84	86	10.14	102	11.49
196264	myelin protein zero-like 3	13	1.71	67	7.89	50	5.93	13	1.63	30	3.03	47	5.47	11	1.97	22	2.3	32	4.29	24	3.12	53	7.44	22	4.6	25	2.8	91	10.73	34	3.83
100131293	hypothetical protein LOC100131293	2	0.26	0	0	0	0	0	0	0	0	2	0.23	0	0	0	0	2	0.27	0	0	5	0.7	0	0	2	0.22	0	0	0	0
646548	hypothetical LOC646548	10	1.32	5	0.59	5	0.59	0	0	7	0.71	9	1.05	5	0.9	0	0	14	1.88	3	0.39	3	0.42	2	0.42	9	1.01	4	0.47	4	0.45
100130458	hypothetical protein LOC100130458	0	0	2	0.24	0	0	0	0	0	0	0	0	0	0	0	0	0	0	0	0	2	0.28	2	0.42	0	0	2	0.24	0	0
80092	hypothetical protein FLJ14082	9	1.19	16	1.88	10	1.19	9	1.13	0	0	7	0.82	6	1.08	0	0	12	1.61	16	2.08	9	1.26	7	1.46	4	0.45	5	0.59	5	0.56
23059	clusterin associated protein 1	33	4.35	9	1.06	7	0.83	24	3.01	12	1.21	13	1.51	7	1.25	19	1.99	12	1.61	27	3.51	21	2.95	5	1.04	35	3.92	18	2.12	22	2.48
1580	cytochrome P450, family 4, subfamily B, polypeptide 1	0	0	0	0	2	0.24	0	0	0	0	0	0	0	0	0	0	0	0	0	0	0	0	0	0	3	0.34	0	0	0	0
90957	DEAH (Asp-Glu-Ala-Asp/His) box polypeptide 57	10	1.32	21	2.47	13	1.54	2	0.25	15	1.51	36	4.19	9	1.61	20	2.09	18	2.42	26	3.38	32	4.49	23	4.8	24	2.69	29	3.42	41	4.62
116442	RAB39B, member RAS oncogene family	11	1.45	42	4.94	38	4.51	20	2.51	2	0.2	47	5.47	33	5.91	17	1.78	60	8.05	54	7.01	60	8.43	46	9.61	56	6.28	42	4.95	42	4.73
7343	upstream binding transcription factor, RNA polymerase I	246	32.41	299	35.19	304	36.06	405	50.81	64	6.45	317	36.91	178	31.9	101	10.57	391	52.47	324	42.06	357	50.13	258	53.89	444	49.78	390	46	365	41.13
602	B-cell CLL/lymphoma 3	1133	149.26	3236	380.83	3003	356.21	1264	158.57	2924	294.86	3915	455.82	1800	322.54	1051	110.02	1305	175.13	1039	134.88	2031	285.21	1343	280.54	2161	242.28	2257	266.22	2108	237.56
285753	chromosome 6 open reading frame 182	5	0.66	6	0.71	3	0.36	4	0.5	44	4.44	8	0.93	2	0.36	60	6.28	10	1.34	7	0.91	7	0.98	4	0.84	15	1.68	11	1.3	17	1.92
5650	kallikrein-related peptidase 7	2	0.26	2	0.24	6	0.71	4	0.5	0	0	2	0.23	4	0.72	0	0	4	0.54	2	0.26	0	0	2	0.42	0	0	0	0	4	0.45
3764	potassium inwardly-rectifying channel, subfamily J, member 8	2	0.26	0	0	0	0	0	0	0	0	0	0	0	0	0	0	0	0	0	0	0	0	0	0	0	0	0	0	0	0
27020	neuroplastin	513	67.58	863	101.56	1034	122.65	1235	154.94	151	15.23	855	99.55	634	113.61	199	20.83	958	128.56	758	98.4	740	103.92	557	116.35	904	101.35	814	96.01	868	97.82
3755	potassium voltage-gated channel, subfamily G, member 1	0	0	0	0	0	0	0	0	4	0.4	4	0.47	2	0.36	0	0	2	0.27	0	0	4	0.56	2	0.42	5	0.56	0	0	10	1.13
84910	transmembrane protein 87B	11	1.45	19	2.24	17	2.02	35	4.39	22	2.22	20	2.33	9	1.61	28	2.93	20	2.68	23	2.99	16	2.25	15	3.13	9	1.01	15	1.77	22	2.48
92399	mitochondrial ribosome recycling factor	26	3.43	34	4	26	3.08	31	3.89	48	4.84	52	6.05	23	4.12	89	9.32	69	9.26	52	6.75	46	6.46	38	7.94	65	7.29	58	6.84	47	5.3
203547	hypothetical protein LOC203547	80	10.54	36	4.24	81	9.61	395	49.55	42	4.24	64	7.45	23	4.12	90	9.42	114	15.3	77	10	79	11.09	74	15.46	69	7.74	95	11.21	87	9.8
127281	chromosome 1 open reading frame 93	154	20.29	95	11.18	128	15.18	371	46.54	39	3.93	137	15.95	53	9.5	29	3.04	174	23.35	118	15.32	131	18.4	116	24.23	110	12.33	164	19.34	154	17.35
79973	zinc finger protein 442	5	0.66	0	0	4	0.47	11	1.38	0	0	2	0.23	0	0	0	0	0	0	2	0.26	0	0	2	0.42	5	0.56	0	0	15	1.69
154197	poly(A)-specific ribonuclease (PARN)-like domain containing 1	4	0.53	4	0.47	0	0	0	0	16	1.61	0	0	0	0	13	1.36	2	0.27	2	0.26	0	0	0	0	3	0.34	3	0.35	5	0.56
6450	SH3 domain binding glutamic acid-rich protein	2	0.26	7	0.82	6	0.71	5	0.63	0	0	3	0.35	4	0.72	0	0	0	0	0	0	7	0.98	2	0.42	19	2.13	7	0.83	7	0.79
643719	zinc finger protein 807	0	0	0	0	2	0.24	4	0.5	0	0	2	0.23	0	0	0	0	4	0.54	0	0	0	0	2	0.42	0	0	0	0	4	0.45
761	carbonic anhydrase III, muscle specific	0	0	2	0.24	2	0.24	0	0	3	0.3	3	0.35	2	0.36	16	1.67	2	0.27	2	0.26	2	0.28	0	0	0	0	0	0	8	0.9
26048	zinc finger protein 500	5	0.66	5	0.59	2	0.24	4	0.5	0	0	4	0.47	2	0.36	3	0.31	25	3.35	9	1.17	8	1.12	6	1.25	2	0.22	9	1.06	5	0.56
6332	sodium channel, voltage-gated, type VII, alpha	0	0	0	0	0	0	0	0	0	0	0	0	0	0	0	0	0	0	0	0	0	0	2	0.42	0	0	3	0.35	0	0
10085	EGF-like repeats and discoidin I-like domains 3	6	0.79	0	0	0	0	4	0.5	0	0	0	0	0	0	0	0	0	0	0	0	0	0	0	0	0	0	0	0	0	0
79892	chromosome 10 open reading frame 119	341	44.92	419	49.31	545	64.65	734	92.08	233	23.5	487	56.7	318	56.98	265	27.74	476	63.88	335	43.49	457	64.18	263	54.94	393	44.06	441	52.02	451	50.82
100129982	similar to ribosomal protein L12	0	0	0	0	0	0	0	0	148	14.92	0	0	0	0	155	16.23	3	0.4	0	0	0	0	5	1.04	0	0	0	0	0	0
768096	highly accelerated region 1A (non-protein coding)	97	12.78	33	3.88	39	4.63	217	27.22	37	3.73	68	7.92	12	2.15	18	1.88	41	5.5	28	3.63	36	5.06	49	10.24	15	1.68	49	5.78	56	6.31
100129578	similar to RING zinc finger LIM domain binding protein	436	57.44	80	9.41	69	8.18	194	24.34	133	13.41	97	11.29	27	4.84	128	13.4	80	10.74	71	9.22	55	7.72	89	18.59	48	5.38	81	9.55	176	19.83
10800	cysteinyl leukotriene receptor 1	12	1.58	16	1.88	18	2.14	2	0.25	28	2.82	22	2.56	15	2.69	9	0.94	37	4.97	30	3.89	29	4.07	31	6.48	31	3.48	35	4.13	30	3.38
100131141	hypothetical LOC100131141	0	0	0	0	0	0	0	0	0	0	0	0	0	0	0	0	6	0.81	2	0.26	0	0	0	0	0	0	0	0	0	0
100131673	similar to hCG1995779	0	0	0	0	0	0	0	0	0	0	2	0.23	0	0	0	0	0	0	0	0	3	0.42	0	0	0	0	0	0	0	0
22854	netrin G1	0	0	0	0	0	0	0	0	0	0	0	0	0	0	0	0	0	0	3	0.39	0	0	0	0	0	0	0	0	0	0
64434	nucleolar protein with MIF4G domain 1	61	8.04	19	2.24	18	2.14	17	2.13	38	3.83	12	1.4	13	2.33	20	2.09	23	3.09	25	3.25	18	2.53	20	4.18	29	3.25	34	4.01	19	2.14
400798	chromosome 1 open reading frame 220	74	9.75	16	1.88	28	3.32	32	4.01	0	0	21	2.45	7	1.25	7	0.73	77	10.33	45	5.84	46	6.46	39	8.15	31	3.48	32	3.77	69	7.78
6867	transforming, acidic coiled-coil containing protein 1	754	99.33	975	114.74	873	103.55	718	90.08	347	34.99	1260	146.7	520	93.18	331	34.65	900	120.78	638	82.82	813	114.17	555	115.93	1088	121.98	865	102.03	869	97.93
57798	GATA zinc finger domain containing 1	414	54.54	230	27.07	219	25.98	532	66.74	269	27.13	344	40.05	168	30.1	418	43.76	231	31	146	18.95	193	27.1	176	36.76	239	26.8	255	30.08	340	38.32
54505	DEAH (Asp-Glu-Ala-His) box polypeptide 29	146	19.23	218	25.66	188	22.3	97	12.17	115	11.6	200	23.29	181	32.43	84	8.79	124	16.64	148	19.21	118	16.57	97	20.26	306	34.31	131	15.45	181	20.4
100129585	similar to hCG2011544	6	0.79	0	0	0	0	0	0	0	0	0	0	0	0	0	0	0	0	0	0	0	0	0	0	0	0	0	0	0	0
8702	UDP-Gal:betaGlcNAc beta 1,4- galactosyltransferase, polypeptide 4	23	3.03	18	2.12	24	2.85	45	5.65	12	1.21	19	2.21	20	3.58	31	3.25	78	10.47	42	5.45	46	6.46	26	5.43	36	4.04	56	6.61	43	4.85
91010	formin-like 3	42	5.53	36	4.24	46	5.46	37	4.64	43	4.34	73	8.5	51	9.14	94	9.84	87	11.68	69	8.96	64	8.99	38	7.94	111	12.44	91	10.73	98	11.04
54461	F-box and WD repeat domain containing 5	93	12.25	143	16.83	150	17.79	70	8.78	314	31.66	143	16.65	137	24.55	345	36.12	297	39.86	205	26.61	205	28.79	160	33.42	198	22.2	198	23.35	127	14.31
91355	low density lipoprotein receptor-related protein 5-like	37	4.87	45	5.3	55	6.52	98	12.29	24	2.42	44	5.12	19	3.4	35	3.66	54	7.25	44	5.71	44	6.18	35	7.31	41	4.6	60	7.08	40	4.51
3257	Hermansky-Pudlak syndrome 1	163	21.47	309	36.37	366	43.41	198	24.84	696	70.19	291	33.88	204	36.55	1141	119.45	408	54.75	367	47.64	409	57.44	229	47.84	378	42.38	368	43.41	393	44.29
162494	rhomboid, veinlet-like 3 (Drosophila)	30	3.95	7	0.82	8	0.95	21	2.63	0	0	11	1.28	5	0.9	0	0	8	1.07	9	1.17	11	1.54	15	3.13	15	1.68	16	1.89	34	3.83
400591	FLJ44815 protein	8	1.05	0	0	0	0	5	0.63	0	0	5	0.58	4	0.72	0	0	0	0	4	0.52	0	0	2	0.42	6	0.67	0	0	10	1.13
23677	SH3-domain binding protein 4	56	7.38	26	3.06	19	2.25	154	19.32	5	0.5	27	3.14	17	3.05	7	0.73	38	5.1	19	2.47	13	1.83	8	1.67	24	2.69	45	5.31	61	6.87
121275	olfactory receptor, family 10, subfamily AD, member 1	5	0.66	0	0	0	0	0	0	0	0	0	0	0	0	0	0	0	0	0	0	0	0	0	0	0	0	0	0	0	0
5583	protein kinase C, eta	209	27.53	248	29.19	272	32.26	543	68.12	875	88.24	272	31.67	174	31.18	1244	130.23	672	90.18	451	58.55	389	54.63	307	64.13	422	47.31	434	51.19	427	48.12
153443	serum response factor binding protein 1	36	4.74	10	1.18	13	1.54	34	4.27	63	6.35	16	1.86	8	1.43	43	4.5	31	4.16	15	1.95	25	3.51	15	3.13	22	2.47	4	0.47	21	2.37
11119	butyrophilin, subfamily 3, member A1	1076	141.75	1668	196.3	1748	207.35	1002	125.7	60	6.05	2024	235.65	1100	197.11	108	11.31	1953	262.09	1209	156.95	1429	200.67	1324	276.57	2420	271.32	1778	209.72	1930	217.5
388611	CD164 sialomucin-like 2	0	0	0	0	0	0	0	0	0	0	0	0	0	0	0	0	0	0	0	0	0	0	0	0	0	0	0	0	2	0.23
10069	RWD domain containing 2B	6	0.79	14	1.65	19	2.25	20	2.51	8	0.81	11	1.28	2	0.36	16	1.67	33	4.43	25	3.25	23	3.23	11	2.3	17	1.91	20	2.36	22	2.48
23197	Fas associated factor family member 2	158	20.81	268	31.54	233	27.64	105	13.17	128	12.91	314	36.56	202	36.2	147	15.39	217	29.12	182	23.63	220	30.89	137	28.62	250	28.03	229	27.01	268	30.2
151230	kelch-like 23 (Drosophila)	2	0.26	0	0	2	0.24	16	2.01	0	0	3	0.35	2	0.36	0	0	5	0.67	0	0	0	0	0	0	0	0	3	0.35	0	0
10926	DBF4 homolog (S. cerevisiae)	30	3.95	28	3.3	28	3.32	63	7.9	42	4.24	19	2.21	8	1.43	163	17.06	56	7.51	41	5.32	46	6.46	24	5.01	43	4.82	33	3.89	33	3.72
3695	integrin, beta 7	236	31.09	421	49.55	309	36.65	135	16.94	318	32.07	489	56.93	253	45.34	353	36.95	640	85.89	452	58.68	390	54.77	329	68.73	584	65.47	497	58.62	482	54.32
100130965	hypothetical protein LOC100130965	12	1.58	25	2.94	9	1.07	18	2.26	0	0	30	3.49	17	3.05	0	0	25	3.35	19	2.47	17	2.39	12	2.51	22	2.47	4	0.47	29	3.27
64601	vacuolar protein sorting 16 homolog (S. cerevisiae)	306	40.31	477	56.14	461	54.68	349	43.78	247	24.91	677	78.82	312	55.91	412	43.13	402	53.95	298	38.69	404	56.73	351	73.32	573	64.24	499	58.86	436	49.13
11152	WD repeat domain 45	421	55.46	618	72.73	647	76.75	609	76.4	1023	103.16	630	73.35	387	69.35	780	81.65	424	56.9	335	43.49	538	75.55	278	58.07	535	59.98	557	65.7	848	95.56
79753	Smad nuclear interacting protein 1	94	12.38	88	10.36	83	9.85	173	21.7	179	18.05	102	11.88	106	18.99	146	15.28	163	21.87	100	12.98	127	17.83	97	20.26	86	9.64	116	13.68	138	15.55
1112	forkhead box N3	391	51.51	452	53.19	505	59.9	1074	134.74	738	74.42	511	59.5	293	52.5	667	69.82	649	87.09	460	59.72	632	88.75	399	83.35	668	74.89	701	82.69	745	83.96
64682	anaphase promoting complex subunit 1	0	0	0	0	0	0	0	0	0	0	3	0.35	0	0	2	0.21	10	1.34	5	0.65	0	0	0	0	12	1.35	6	0.71	27	3.04
4283	chemokine (C-X-C motif) ligand 9	0	0	0	0	0	0	0	0	7	0.71	0	0	2	0.36	0	0	3	0.4	0	0	0	0	2	0.42	10	1.12	0	0	0	0
253769	WD repeat domain 27	14	1.84	14	1.65	12	1.42	10	1.25	7	0.71	36	4.19	14	2.51	45	4.71	24	3.22	22	2.86	22	3.09	13	2.72	22	2.47	19	2.24	23	2.59
10197	proteasome (prosome, macropain) activator subunit 3 (PA28 gamma; Ki)	190	25.03	463	54.49	452	53.62	144	18.07	357	36	484	56.35	432	77.41	313	32.77	622	83.47	538	69.84	547	76.81	284	59.33	585	65.59	456	53.79	428	48.23
100131190	hypothetical protein LOC100131190	0	0	0	0	0	0	0	0	0	0	2	0.23	0	0	0	0	2	0.27	0	0	0	0	2	0.42	4	0.45	0	0	0	0
728324	similar to 16.7Kd protein	0	0	0	0	0	0	0	0	0	0	0	0	0	0	0	0	2	0.27	0	0	0	0	0	0	0	0	0	0	0	0
162968	zinc finger protein 497	0	0	0	0	0	0	6	0.75	0	0	0	0	0	0	0	0	0	0	2	0.26	0	0	3	0.63	0	0	0	0	0	0
6670	Sp3 transcription factor	378	49.8	706	83.09	1051	124.67	733	91.96	116	11.7	695	80.92	689	123.46	71	7.43	937	125.74	737	95.68	838	117.68	466	97.34	843	94.51	787	92.83	834	93.99
51657	serine/threonine/tyrosine interacting-like 1	59	7.77	87	10.24	114	13.52	83	10.41	119	12	79	9.2	58	10.39	89	9.32	88	11.81	59	7.66	76	10.67	76	15.88	87	9.75	96	11.32	119	13.41
339390	C-type lectin superfamily 4, member G	0	0	0	0	2	0.24	2	0.25	0	0	0	0	0	0	3	0.31	0	0	0	0	0	0	0	0	4	0.45	0	0	0	0
7773	zinc finger protein 230	18	2.37	57	6.71	85	10.08	38	4.77	313	31.56	45	5.24	40	7.17	183	19.16	32	4.29	45	5.84	51	7.16	26	5.43	65	7.29	86	10.14	86	9.69
728787	similar to hCG1987397	2	0.26	0	0	5	0.59	0	0	838	84.5	3	0.35	2	0.36	1187	124.26	10	1.34	0	0	3	0.42	2	0.42	11	1.23	3	0.35	0	0
5699	proteasome (prosome, macropain) subunit, beta type, 10	309	40.71	578	68.02	627	74.37	144	18.07	641	64.64	744	86.62	730	130.81	707	74.01	593	79.58	420	54.52	393	55.19	427	89.2	777	87.11	600	70.77	573	64.57
440086	ribosomal protein S6 pseudogene 1	0	0	0	0	0	0	2	0.25	0	0	0	0	0	0	0	0	0	0	0	0	0	0	0	0	0	0	0	0	2	0.23
1847	dual specificity phosphatase 5	34	4.48	35	4.12	26	3.08	57	7.15	224	22.59	39	4.54	9	1.61	121	12.67	86	11.54	25	3.25	38	5.34	53	11.07	48	5.38	49	5.78	21	2.37
29902	chromosome 12 open reading frame 24	30	3.95	50	5.88	44	5.22	31	3.89	16	1.61	83	9.66	46	8.24	23	2.41	57	7.65	30	3.89	56	7.86	23	4.8	71	7.96	37	4.36	98	11.04
54953	chromosome 1 open reading frame 27	151	19.89	177	20.83	247	29.3	259	32.49	263	26.52	195	22.7	114	20.43	269	28.16	264	35.43	159	20.64	219	30.75	164	34.26	253	28.36	250	29.49	212	23.89
3267	HIV-1 Rev binding protein	120	15.81	354	41.66	337	39.97	63	7.9	313	31.56	426	49.6	249	44.62	302	31.61	247	33.15	191	24.8	238	33.42	132	27.57	338	37.89	329	38.81	171	19.27
339479	family with sequence similarity 5, member C	2	0.26	0	0	0	0	10	1.25	0	0	0	0	0	0	0	0	0	0	0	0	0	0	0	0	0	0	0	0	0	0
23567	zinc finger protein 346	62	8.17	27	3.18	26	3.08	48	6.02	131	13.21	25	2.91	12	2.15	215	22.51	47	6.31	35	4.54	10	1.4	35	7.31	30	3.36	41	4.84	35	3.94
441046	glucuronidase, beta pseudogene	0	0	0	0	0	0	3	0.38	0	0	0	0	0	0	0	0	0	0	0	0	0	0	0	0	5	0.56	0	0	0	0
283755	hect domain and RLD 2 pseudogene 3	0	0	0	0	0	0	0	0	0	0	0	0	0	0	0	0	5	0.67	0	0	2	0.28	2	0.42	0	0	0	0	0	0
84276	nicolin 1	18	2.37	13	1.53	9	1.07	12	1.51	246	24.81	16	1.86	6	1.08	384	40.2	9	1.21	19	2.47	14	1.97	16	3.34	21	2.35	18	2.12	30	3.38
80705	testis specific, 10	42	5.53	9	1.06	6	0.71	24	3.01	5	0.5	11	1.28	0	0	19	1.99	18	2.42	10	1.3	9	1.26	14	2.92	16	1.79	22	2.59	29	3.27
79694	mannosidase, endo-alpha	73	9.62	30	3.53	52	6.17	242	30.36	53	5.34	21	2.45	11	1.97	45	4.71	48	6.44	28	3.63	28	3.93	26	5.43	73	8.18	49	5.78	86	9.69
1789	DNA (cytosine-5-)-methyltransferase 3 beta	4	0.53	5	0.59	2	0.24	3	0.38	3	0.3	2	0.23	0	0	0	0	4	0.54	0	0	0	0	2	0.42	8	0.9	2	0.24	0	0
146760	reticulon 4 receptor-like 1	3	0.4	0	0	2	0.24	3	0.38	3	0.3	0	0	0	0	6	0.63	0	0	0	0	0	0	0	0	0	0	6	0.71	0	0
23218	neurobeachin-like 2	410	54.01	3632	427.44	5114	606.62	1801	225.94	2933	295.77	4242	493.9	3006	538.65	2264	237.01	3116	418.16	1561	202.65	4417	620.27	2116	442.01	2924	327.82	3850	454.12	2716	306.07
283596	small nucleolar RNA host gene 10 (non-protein coding)	41	5.4	40	4.71	50	5.93	24	3.01	35	3.53	56	6.52	47	8.42	67	7.01	61	8.19	59	7.66	47	6.6	41	8.56	88	9.87	43	5.07	108	12.17
1441	colony stimulating factor 3 receptor (granulocyte)	4879	642.74	17669	2079.4	17809	2112.49	6112	766.77	36695	3700.36	14027	1633.17	11204	2007.65	28295	2962.05	10525	1412.42	7625	989.86	14010	1967.4	8234	1720.01	11685	1310.06	13422	1583.17	10146	1143.38
4500	metallothionein 1L (gene/pseudogene)	0	0	2	0.24	3	0.36	5	0.63	0	0	5	0.58	3	0.54	0	0	0	0	5	0.65	3	0.42	0	0	3	0.34	11	1.3	0	0
100132774	hypothetical protein LOC100132774	15	1.98	0	0	3	0.36	0	0	21	2.12	2	0.23	3	0.54	24	2.51	0	0	0	0	0	0	2	0.42	0	0	5	0.59	3	0.34
5452	POU class 2 homeobox 2	806	106.18	828	97.44	631	74.85	876	109.9	209	21.08	1115	129.82	597	106.98	215	22.51	845	113.4	552	71.66	961	134.95	773	161.47	1116	125.12	981	115.71	1151	129.71
100131572	similar to hCG1783679	72	9.49	35	4.12	45	5.34	101	12.67	0	0	37	4.31	15	2.69	0	0	127	17.04	84	10.9	61	8.57	30	6.27	72	8.07	61	7.2	60	6.76
642313	hypothetical LOC642313	2	0.26	0	0	0	0	0	0	20	2.02	0	0	0	0	30	3.14	0	0	0	0	0	0	0	0	0	0	0	0	0	0
8398	phospholipase A2, group VI (cytosolic, calcium-independent)	272	35.83	235	27.66	349	41.4	247	30.99	76	7.66	385	44.83	270	48.38	83	8.69	250	33.55	108	14.02	318	44.66	146	30.5	1418	158.98	1972	232.6	1058	119.23
134145	family with sequence similarity 173, member B	24	3.16	36	4.24	28	3.32	79	9.91	2	0.2	35	4.08	16	2.87	5	0.52	88	11.81	50	6.49	61	8.57	30	6.27	33	3.7	63	7.43	51	5.75
23061	TBC1 domain family, member 9B (with GRAM domain)	148	19.5	165	19.42	141	16.73	108	13.55	138	13.92	204	23.75	120	21.5	125	13.09	337	45.22	281	36.48	237	33.28	244	50.97	225	25.23	207	24.42	273	30.76
10522	deformed epidermal autoregulatory factor 1 (Drosophila)	30	3.95	34	4	31	3.68	15	1.88	132	13.31	35	4.08	26	4.66	130	13.61	28	3.76	32	4.15	37	5.2	33	6.89	65	7.29	33	3.89	18	2.03
100134189	similar to cofactor required for Sp1 transcriptional activation, subunit 8, 34kDa	0	0	0	0	0	0	0	0	0	0	0	0	0	0	0	0	2	0.27	0	0	0	0	0	0	6	0.67	2	0.24	0	0
140609	NIMA (never in mitosis gene a)-related kinase 7	0	0	0	0	0	0	7	0.88	14	1.41	0	0	9	1.61	8	0.84	37	4.97	29	3.76	28	3.93	15	3.13	5	0.56	22	2.59	4	0.45
100127999	similar to ribosomal protein L18a	6	0.79	2	0.24	0	0	19	2.38	0	0	5	0.58	8	1.43	0	0	12	1.61	12	1.56	4	0.56	7	1.46	3	0.34	12	1.42	12	1.35
57212	KIAA0495	79	10.41	16	1.88	39	4.63	60	7.53	50	5.04	64	7.45	18	3.23	41	4.29	58	7.78	35	4.54	57	8	29	6.06	49	5.49	55	6.49	119	13.41
343171	olfactory receptor, family 2, subfamily W, member 3	0	0	0	0	0	0	7	0.88	0	0	0	0	0	0	0	0	2	0.27	18	2.34	0	0	0	0	0	0	2	0.24	0	0
54933	rhomboid, veinlet-like 2 (Drosophila)	0	0	0	0	0	0	0	0	0	0	0	0	0	0	2	0.21	0	0	0	0	0	0	0	0	0	0	0	0	0	0
11228	Ras association (RalGDS/AF-6) domain family (N-terminal) member 8	0	0	0	0	0	0	0	0	15	1.51	0	0	0	0	0	0	0	0	0	0	0	0	0	0	0	0	0	0	0	0
51294	protocadherin 12	0	0	0	0	0	0	3	0.38	0	0	0	0	0	0	4	0.42	0	0	0	0	0	0	0	0	0	0	2	0.24	0	0
573	BCL2-associated athanogene	173	22.79	280	32.95	356	42.23	268	33.62	85	8.57	224	26.08	167	29.92	105	10.99	343	46.03	665	86.33	400	56.17	186	38.85	462	51.8	334	39.4	349	39.33
246269	lactation elevated 1	2	0.26	0	0	0	0	3	0.38	0	0	2	0.23	5	0.9	3	0.31	8	1.07	5	0.65	6	0.84	6	1.25	7	0.78	10	1.18	6	0.68
3293	hydroxysteroid (17-beta) dehydrogenase 3	0	0	0	0	0	0	2	0.25	4	0.4	0	0	0	0	6	0.63	3	0.4	2	0.26	0	0	0	0	2	0.22	2	0.24	8	0.9
54903	Meckel syndrome, type 1	11	1.45	14	1.65	6	0.71	22	2.76	51	5.14	18	2.1	6	1.08	33	3.45	28	3.76	18	2.34	25	3.51	17	3.55	19	2.13	23	2.71	56	6.31
83401	elongation of very long chain fatty acids (FEN1/Elo2, SUR4/Elo3, yeast)-like 3	3	0.4	2	0.24	0	0	0	0	0	0	0	0	0	0	2	0.21	0	0	0	0	0	0	0	0	2	0.22	6	0.71	0	0
10129	furry homolog (Drosophila)	114	15.02	413	48.6	509	60.38	120	15.05	214	21.58	370	43.08	314	56.27	59	6.18	339	45.49	285	37	289	40.58	222	46.37	328	36.77	303	35.74	374	42.15
730432	similar to serine/threonine/tyrosine interacting protein	134	17.65	90	10.59	107	12.69	333	41.78	263	26.52	115	13.39	68	12.18	360	37.69	193	25.9	132	17.14	152	21.35	105	21.93	165	18.5	178	21	211	23.78
388556	hypothetical gene supported by NM_001013	0	0	0	0	0	0	0	0	1352	136.34	0	0	0	0	1046	109.5	0	0	0	0	0	0	0	0	0	0	0	0	0	0
929	CD14 molecule	510	67.19	978	115.1	1138	134.99	1293	162.21	2442	246.25	1211	141	592	106.08	2284	239.1	766	102.79	1131	146.82	1096	153.91	1141	238.35	1174	131.62	1196	141.07	1461	164.64
1728	NAD(P)H dehydrogenase, quinone 1	63	8.3	14	1.65	16	1.9	14	1.76	52	5.24	15	1.75	14	2.51	27	2.83	31	4.16	34	4.41	28	3.93	22	4.6	13	1.46	28	3.3	28	3.16
84465	multiple EGF-like-domains 11	0	0	0	0	0	0	0	0	0	0	0	0	0	0	0	0	0	0	0	0	0	0	0	0	0	0	3	0.35	0	0
26233	F-box and leucine-rich repeat protein 6	25	3.29	37	4.35	45	5.34	47	5.9	92	9.28	34	3.96	27	4.84	95	9.95	53	7.11	37	4.8	46	6.46	40	8.36	45	5.05	63	7.43	47	5.3
1856	dishevelled, dsh homolog 2 (Drosophila)	71	9.35	71	8.36	84	9.96	56	7.03	20	2.02	104	12.11	45	8.06	25	2.62	99	13.29	54	7.01	97	13.62	49	10.24	106	11.88	102	12.03	113	12.73
100132455	hypothetical protein LOC100132455	3	0.4	0	0	0	0	0	0	0	0	0	0	0	0	0	0	0	0	0	0	0	0	0	0	0	0	0	0	0	0
10063	COX17 cytochrome c oxidase assembly homolog (S. cerevisiae)	91	11.99	71	8.36	102	12.1	141	17.69	0	0	81	9.43	37	6.63	0	0	82	11	45	5.84	45	6.32	50	10.44	130	14.57	74	8.73	109	12.28
79072	FAST kinase domains 3	90	11.86	89	10.47	99	11.74	35	4.39	125	12.61	141	16.42	87	15.59	294	30.78	99	13.29	85	11.03	73	10.25	67	14	157	17.6	98	11.56	134	15.1
51171	hydroxysteroid (17-beta) dehydrogenase 14	5	0.66	0	0	0	0	9	1.13	0	0	9	1.05	0	0	0	0	2	0.27	2	0.26	0	0	0	0	2	0.22	2	0.24	0	0
100133950	hypothetical protein LOC100133950	6	0.79	0	0	0	0	0	0	0	0	0	0	0	0	0	0	0	0	0	0	2	0.28	0	0	0	0	2	0.24	0	0
4363	ATP-binding cassette, sub-family C (CFTR/MRP), member 1	138	18.18	159	18.71	195	23.13	451	56.58	886	89.35	222	25.85	146	26.16	766	80.19	300	40.26	157	20.38	200	28.09	143	29.87	263	29.49	260	30.67	348	39.22
400759	interferon-induced guanylate-binding protein 1 pseudogene	2	0.26	0	0	0	0	0	0	2	0.2	0	0	0	0	5	0.52	5	0.67	3	0.39	3	0.42	2	0.42	0	0	0	0	0	0
9464	heart and neural crest derivatives expressed 2	0	0	0	0	0	0	0	0	0	0	0	0	0	0	2	0.21	0	0	0	0	0	0	0	0	0	0	0	0	0	0
92359	crumbs homolog 3 (Drosophila)	0	0	0	0	0	0	0	0	0	0	0	0	0	0	3	0.31	0	0	0	0	3	0.42	2	0.42	0	0	0	0	0	0
57827	chromosome 6 open reading frame 47	53	6.98	46	5.41	143	16.96	251	31.49	141	14.22	92	10.71	78	13.98	296	30.99	80	10.74	34	4.41	93	13.06	48	10.03	92	10.31	112	13.21	60	6.76
57143	aarF domain containing kinase 1	20	2.63	18	2.12	24	2.85	32	4.01	22	2.22	33	3.84	27	4.84	29	3.04	42	5.64	45	5.84	39	5.48	23	4.8	40	4.48	36	4.25	25	2.82
100129510	hypothetical protein LOC100129510	0	0	0	0	0	0	0	0	0	0	0	0	0	0	0	0	0	0	0	0	3	0.42	0	0	3	0.34	0	0	0	0
11067	chromosome 10 open reading frame 10	0	0	0	0	0	0	0	0	0	0	5	0.58	0	0	0	0	0	0	2	0.26	0	0	0	0	0	0	0	0	2	0.23
80895	integrin-linked kinase-associated serine/threonine phosphatase 2C	195	25.69	243	28.6	297	35.23	638	80.04	172	17.34	364	42.38	208	37.27	181	18.95	259	34.76	200	25.96	223	31.32	145	30.29	384	43.05	288	33.97	432	48.68
55906	KIAA1166	4	0.53	7	0.82	10	1.19	14	1.76	16	1.61	8	0.93	0	0	18	1.88	7	0.94	8	1.04	6	0.84	4	0.84	13	1.46	14	1.65	25	2.82
340515	hypothetical protein LOC340515	4	0.53	0	0	0	0	0	0	0	0	0	0	0	0	0	0	0	0	2	0.26	2	0.28	0	0	0	0	3	0.35	3	0.34
1993	ELAV (embryonic lethal, abnormal vision, Drosophila)-like 2 (Hu antigen B)	2	0.26	14	1.65	4	0.47	6	0.75	0	0	6	0.7	2	0.36	0	0	0	0	0	0	3	0.42	0	0	15	1.68	5	0.59	0	0
118472	zinc finger protein 511	113	14.89	157	18.48	137	16.25	287	36.01	90	9.08	258	30.04	109	19.53	140	14.66	237	31.8	153	19.86	186	26.12	132	27.57	261	29.26	156	18.4	256	28.85
84658	egf-like module containing, mucin-like, hormone receptor-like 3	55	7.25	146	17.18	199	23.61	211	26.47	487	49.11	119	13.86	99	17.74	280	29.31	104	13.96	119	15.45	106	14.89	83	17.34	126	14.13	180	21.23	104	11.72
84206	mex-3 homolog B (C. elegans)	4	0.53	4	0.47	4	0.47	3	0.38	0	0	6	0.7	0	0	11	1.15	17	2.28	6	0.78	6	0.84	4	0.84	11	1.23	16	1.89	6	0.68
286144	chromosome 8 open reading frame 83	30	3.95	95	11.18	84	9.96	48	6.02	29	2.92	134	15.6	110	19.71	42	4.4	109	14.63	106	13.76	88	12.36	77	16.08	115	12.89	80	9.44	73	8.23
100133144	hypothetical protein LOC100133144	24	3.16	0	0	0	0	9	1.13	5	0.5	0	0	0	0	0	0	0	0	2	0.26	0	0	2	0.42	0	0	3	0.35	11	1.24
51560	RAB6B, member RAS oncogene family	139	18.31	129	15.18	137	16.25	250	31.36	12	1.21	179	20.84	83	14.87	39	4.08	191	25.63	73	9.48	157	22.05	89	18.59	152	17.04	187	22.06	182	20.51
57622	leucine rich repeat and fibronectin type III domain containing 1	6	0.79	13	1.53	37	4.39	7	0.88	197	19.87	28	3.26	24	4.3	110	11.52	5	0.67	2	0.26	26	3.65	10	2.09	18	2.02	31	3.66	14	1.58
84518	cornifelin	0	0	3	0.35	0	0	0	0	15	1.51	0	0	0	0	49	5.13	0	0	3	0.39	0	0	0	0	0	0	0	0	2	0.23
24141	chromosome 20 open reading frame 103	9	1.19	8	0.94	3	0.36	0	0	0	0	3	0.35	2	0.36	20	2.09	11	1.48	8	1.04	7	0.98	7	1.46	2	0.22	0	0	8	0.9
729449	similar to hCG1783090	0	0	0	0	0	0	0	0	4	0.4	0	0	0	0	2	0.21	2	0.27	0	0	0	0	0	0	6	0.67	0	0	0	0
284349	zinc finger protein 283	9	1.19	7	0.82	2	0.24	23	2.89	0	0	0	0	2	0.36	0	0	6	0.81	2	0.26	2	0.28	0	0	2	0.22	4	0.47	18	2.03
23506	KIAA0240	170	22.4	314	36.95	261	30.96	216	27.1	214	21.58	307	35.74	178	31.9	135	14.13	359	48.18	217	28.17	262	36.79	208	43.45	253	28.36	287	33.85	268	30.2
2308	forkhead box O1	73	9.62	172	20.24	167	19.81	95	11.92	330	33.28	198	23.05	96	17.2	216	22.61	182	24.42	157	20.38	139	19.52	112	23.4	272	30.5	251	29.61	185	20.85
10743	retinoic acid induced 1	6	0.79	7	0.82	12	1.42	2	0.25	10	1.01	9	1.05	14	2.51	39	4.08	19	2.55	11	1.43	17	2.39	11	2.3	22	2.47	19	2.24	7	0.79
401944	low density lipoprotein receptor class A domain containing 2	0	0	0	0	0	0	2	0.25	0	0	0	0	0	0	7	0.73	0	0	0	0	2	0.28	0	0	3	0.34	5	0.59	7	0.79
83638	chromosome 11 open reading frame 68	62	8.17	187	22.01	170	20.17	93	11.67	157	15.83	149	17.35	141	25.27	201	21.04	152	20.4	139	18.04	113	15.87	97	20.26	148	16.59	130	15.33	106	11.95
9493	kinesin family member 23	14	1.84	6	0.71	10	1.19	4	0.5	0	0	8	0.93	5	0.9	3	0.31	13	1.74	3	0.39	6	0.84	2	0.42	0	0	2	0.24	20	2.25
645984	hypothetical LOC645984	20	2.63	58	6.83	44	5.22	23	2.89	9	0.91	31	3.61	19	3.4	17	1.78	32	4.29	14	1.82	40	5.62	19	3.97	27	3.03	40	4.72	16	1.8
1230	chemokine (C-C motif) receptor 1	326	42.95	718	84.5	768	91.1	356	44.66	2952	297.68	990	115.27	644	115.4	3813	399.16	724	97.16	643	83.47	907	127.37	1018	212.65	895	100.34	834	98.37	813	91.62
92293	transmembrane protein 132C	0	0	0	0	0	0	0	0	0	0	0	0	0	0	0	0	2	0.27	0	0	0	0	0	0	0	0	0	0	4	0.45
5496	protein phosphatase 1G (formerly 2C), magnesium-dependent, gamma isoform	216	28.46	342	40.25	322	38.2	506	63.48	316	31.87	467	54.37	286	51.25	337	35.28	600	80.52	396	51.41	558	78.36	444	92.75	485	54.38	444	52.37	631	71.11
51804	SIX homeobox 4	41	5.4	22	2.59	21	2.49	26	3.26	0	0	29	3.38	0	0	0	0	10	1.34	6	0.78	4	0.56	25	5.22	9	1.01	20	2.36	22	2.48
3417	isocitrate dehydrogenase 1 (NADP+), soluble	86	11.33	131	15.42	132	15.66	4	0.5	67	6.76	121	14.09	88	15.77	47	4.92	156	20.93	118	15.32	124	17.41	75	15.67	192	21.53	114	13.45	157	17.69
729142	similar to Chain A, Gppnhp-Bound Rab5c G55q Mutant Gtpase	2	0.26	0	0	0	0	2	0.25	13	1.31	0	0	0	0	0	0	2	0.27	2	0.26	0	0	3	0.63	0	0	0	0	0	0
56034	platelet derived growth factor C	12	1.58	13	1.53	12	1.42	18	2.26	7	0.71	13	1.51	5	0.9	40	4.19	17	2.28	22	2.86	18	2.53	13	2.72	18	2.02	20	2.36	20	2.25
401331	hypothetical protein FLJ21767	7	0.92	14	1.65	21	2.49	14	1.76	0	0	28	3.26	16	2.87	2	0.21	22	2.95	7	0.91	19	2.67	14	2.92	21	2.35	13	1.53	33	3.72
144715	RAD9 homolog B (S. cerevisiae)	0	0	2	0.24	3	0.36	3	0.38	10	1.01	0	0	0	0	0	0	0	0	4	0.52	0	0	0	0	0	0	2	0.24	2	0.23
8554	protein inhibitor of activated STAT, 1	136	17.92	221	26.01	220	26.1	311	39.02	679	68.47	180	20.96	170	30.46	522	54.65	152	20.4	113	14.67	140	19.66	102	21.31	194	21.75	148	17.46	144	16.23
84141	family with sequence similarity 176, member A	0	0	0	0	0	0	3	0.38	0	0	0	0	0	0	0	0	2	0.27	0	0	2	0.28	0	0	0	0	0	0	11	1.24
140290	t-complex 10 (mouse)-like	0	0	0	0	3	0.36	0	0	0	0	0	0	0	0	0	0	0	0	0	0	0	0	0	0	3	0.34	0	0	0	0
54810	GIPC PDZ domain containing family, member 2	2	0.26	0	0	0	0	0	0	0	0	0	0	0	0	0	0	0	0	2	0.26	3	0.42	0	0	0	0	2	0.24	8	0.9
88455	ankyrin repeat domain 13A	260	34.25	922	108.51	940	111.5	128	16.06	398	40.13	811	94.42	507	90.85	326	34.13	553	74.21	474	61.53	559	78.5	389	81.26	1039	116.49	864	101.91	741	83.5
2186	bromodomain PHD finger transcription factor	305	40.18	296	34.84	416	49.35	702	88.07	304	30.66	303	35.28	188	33.69	357	37.37	393	52.74	225	29.21	261	36.65	176	36.76	267	29.93	320	37.74	368	41.47
905	cyclin T2	252	33.2	350	41.19	476	56.46	375	47.05	142	14.32	326	37.96	248	44.44	163	17.06	570	76.49	378	49.07	422	59.26	264	55.15	379	42.49	415	48.95	411	46.32
643201	hypothetical protein LOC643201	0	0	0	0	0	0	0	0	26	2.62	0	0	0	0	0	0	0	0	0	0	0	0	0	0	0	0	0	0	0	0
8028	myeloid/lymphoid or mixed-lineage leukemia (trithorax homolog, Drosophila); translocated to, 10	87	11.46	126	14.83	123	14.59	24	3.01	126	12.71	196	22.82	104	18.64	125	13.09	203	27.24	102	13.24	72	10.11	82	17.13	198	22.2	136	16.04	97	10.93
6403	selectin P (granule membrane protein 140kDa, antigen CD62)	17	2.24	29	3.41	19	2.25	23	2.89	6	0.61	57	6.64	32	5.73	5	0.52	112	15.03	50	6.49	34	4.77	47	9.82	57	6.39	59	6.96	52	5.86
2131	exostoses (multiple) 1	12	1.58	30	3.53	42	4.98	37	4.64	422	42.55	56	6.52	29	5.2	259	27.11	15	2.01	24	3.12	29	4.07	17	3.55	15	1.68	41	4.84	8	0.9
653381	SORD pseudogene	70	9.22	31	3.65	46	5.46	46	5.77	6	0.61	58	6.75	62	11.11	10	1.05	47	6.31	67	8.7	51	7.16	112	23.4	27	3.03	99	11.68	122	13.75
64689	golgi reassembly stacking protein 1, 65kDa	150	19.76	234	27.54	275	32.62	440	55.2	74	7.46	375	43.66	175	31.36	117	12.25	267	35.83	170	22.07	375	52.66	280	58.49	294	32.96	330	38.92	365	41.13
5753	PTK6 protein tyrosine kinase 6	0	0	0	0	0	0	4	0.5	0	0	0	0	0	0	0	0	0	0	0	0	7	0.98	3	0.63	0	0	6	0.71	11	1.24
53615	methyl-CpG binding domain protein 3	0	0	0	0	3	0.36	10	1.25	81	8.17	12	1.4	2	0.36	271	28.37	37	4.97	7	0.91	28	3.93	16	3.34	8	0.9	19	2.24	16	1.8
399744	hypothetical LOC399744	89	11.72	55	6.47	20	2.37	24	3.01	0	0	46	5.36	19	3.4	0	0	40	5.37	46	5.97	32	4.49	35	7.31	44	4.93	65	7.67	64	7.21
153642	arylsulfatase family, member K	22	2.9	9	1.06	13	1.54	37	4.64	8	0.81	10	1.16	5	0.9	10	1.05	18	2.42	8	1.04	4	0.56	13	2.72	13	1.46	20	2.36	32	3.61
729798	similar to ribosomal protein L23a	0	0	0	0	0	0	0	0	116	11.7	0	0	0	0	192	20.1	0	0	0	0	0	0	0	0	0	0	0	0	0	0
23284	latrophilin 3	2	0.26	0	0	0	0	0	0	17	1.71	0	0	0	0	26	2.72	6	0.81	0	0	0	0	0	0	0	0	0	0	0	0
9318	COP9 constitutive photomorphogenic homolog subunit 2 (Arabidopsis)	65	8.56	150	17.65	94	11.15	10	1.25	100	10.08	197	22.94	127	22.76	80	8.37	145	19.46	102	13.24	95	13.34	73	15.25	201	22.53	137	16.16	116	13.07
55110	mago-nashi homolog B (Drosophila)	23	3.03	22	2.59	20	2.37	34	4.27	63	6.35	22	2.56	6	1.08	61	6.39	26	3.49	13	1.69	21	2.95	11	2.3	19	2.13	21	2.48	52	5.86
5528	protein phosphatase 2, regulatory subunit B', delta isoform	30	3.95	65	7.65	48	5.69	21	2.63	74	7.46	63	7.34	32	5.73	92	9.63	100	13.42	46	5.97	69	9.69	47	9.82	82	9.19	77	9.08	55	6.2
5734	prostaglandin E receptor 4 (subtype EP4)	173	22.79	510	60.02	262	31.08	69	8.66	391	39.43	477	55.54	279	49.99	453	47.42	449	60.25	310	40.24	296	41.57	222	46.37	529	59.31	472	55.67	293	33.02
117852	tripartite motif-containing pseudogene 1	8	1.05	0	0	2	0.24	0	0	0	0	0	0	0	0	0	0	0	0	0	0	0	0	0	0	0	0	0	0	4	0.45
4141	methionyl-tRNA synthetase	186	24.5	548	64.49	606	71.88	353	44.29	1461	147.33	503	58.56	368	65.94	1555	162.78	405	54.35	363	47.12	507	71.2	291	60.79	378	42.38	541	63.81	491	55.33
11213	interleukin-1 receptor-associated kinase 3	291	38.34	362	42.6	356	42.23	517	64.86	118	11.9	468	54.49	199	35.66	71	7.43	292	39.19	190	24.67	295	41.43	267	55.77	205	22.98	259	30.55	383	43.16
254827	N-acetylated alpha-linked acidic dipeptidase-like 2	5	0.66	0	0	0	0	0	0	0	0	0	0	0	0	0	0	0	0	0	0	0	0	0	0	0	0	0	0	0	0
256158	hemicentin 2	0	0	0	0	0	0	0	0	0	0	0	0	0	0	0	0	0	0	0	0	0	0	0	0	2	0.22	0	0	0	0
4830	non-metastatic cells 1, protein (NM23A) expressed in	15	1.98	28	3.3	17	2.02	28	3.51	38	3.83	15	1.75	8	1.43	94	9.84	15	2.01	18	2.34	9	1.26	11	2.3	26	2.91	16	1.89	28	3.16
284069	family with sequence similarity 171, member A2	0	0	0	0	0	0	0	0	2	0.2	0	0	0	0	0	0	0	0	0	0	0	0	0	0	2	0.22	0	0	0	0
22905	epsin 2	0	0	9	1.06	7	0.83	0	0	52	5.24	12	1.4	8	1.43	42	4.4	13	1.74	12	1.56	8	1.12	6	1.25	17	1.91	5	0.59	14	1.58
5007	oxysterol binding protein	74	9.75	84	9.89	109	12.93	136	17.06	119	12	126	14.67	65	11.65	146	15.28	178	23.89	117	15.19	129	18.12	86	17.96	160	17.94	140	16.51	107	12.06
79596	ring finger protein 219	57	7.51	41	4.83	38	4.51	43	5.39	49	4.94	98	11.41	27	4.84	46	4.82	94	12.61	74	9.61	52	7.3	49	10.24	88	9.87	71	8.37	63	7.1
285382	chromosome 3 open reading frame 70	11	1.45	0	0	0	0	0	0	43	4.34	0	0	0	0	21	2.2	2	0.27	0	0	3	0.42	0	0	3	0.34	0	0	0	0
9616	ring finger protein 7	182	23.98	177	20.83	197	23.37	551	69.12	2162	218.02	233	27.13	104	18.64	1980	207.28	195	26.17	158	20.51	150	21.06	156	32.59	251	28.14	161	18.99	184	20.74
56172	ankylosis, progressive homolog (mouse)	102	13.44	86	10.12	114	13.52	309	38.77	217	21.88	96	11.18	51	9.14	464	48.57	185	24.83	143	18.56	98	13.76	69	14.41	178	19.96	181	21.35	120	13.52
1032	cyclin-dependent kinase inhibitor 2D (p19, inhibits CDK4)	492	64.81	2161	254.32	1954	231.78	694	87.06	232	23.4	2859	332.87	1605	287.6	201	21.04	2369	317.91	1286	166.95	2955	414.96	2070	432.41	2579	289.14	3165	373.32	3657	412.12
10440	translocase of inner mitochondrial membrane 17 homolog A (yeast)	71	9.35	107	12.59	136	16.13	177	22.21	169	17.04	127	14.79	88	15.77	247	25.86	182	24.42	125	16.23	146	20.5	107	22.35	200	22.42	202	23.83	101	11.38
114898	C1q and tumor necrosis factor related protein 2	40	5.27	21	2.47	31	3.68	2	0.25	0	0	38	4.42	26	4.66	0	0	12	1.61	4	0.52	5	0.7	9	1.88	0	0	10	1.18	20	2.25
6248	regulatory solute carrier protein, family 1, member 1	0	0	3	0.35	0	0	0	0	0	0	0	0	2	0.36	0	0	2	0.27	4	0.52	5	0.7	0	0	0	0	10	1.18	0	0
55578	family with sequence similarity 48, member A	4	0.53	68	8	67	7.95	19	2.38	62	6.25	79	9.2	71	12.72	23	2.41	222	29.79	177	22.98	220	30.89	154	32.17	182	20.4	225	26.54	167	18.82
670	biphenyl hydrolase-like (serine hydrolase)	39	5.14	19	2.24	26	3.08	15	1.88	95	9.58	67	7.8	24	4.3	229	23.97	19	2.55	14	1.82	16	2.25	10	2.09	49	5.49	31	3.66	24	2.7
374393	family with sequence similarity 111, member B	328	43.21	31	3.65	23	2.73	150	18.82	0	0	24	2.79	16	2.87	11	1.15	44	5.9	47	6.1	33	4.63	63	13.16	24	2.69	39	4.6	119	13.41
100131001	hypothetical protein LOC100131001	0	0	0	0	0	0	3	0.38	0	0	0	0	0	0	0	0	0	0	0	0	0	0	0	0	0	0	0	0	0	0
79608	resistance to inhibitors of cholinesterase 3 homolog (C. elegans)	9	1.19	3	0.35	5	0.59	10	1.25	29	2.92	12	1.4	4	0.72	43	4.5	14	1.88	14	1.82	13	1.83	4	0.84	3	0.34	9	1.06	13	1.46
100128547	hypothetical protein LOC100128547	0	0	0	0	0	0	0	0	0	0	0	0	0	0	0	0	0	0	0	0	0	0	0	0	0	0	2	0.24	0	0
645121	cyclin I family, member 2	8	1.05	5	0.59	2	0.24	25	3.14	6	0.61	4	0.47	0	0	0	0	6	0.81	5	0.65	9	1.26	0	0	8	0.9	4	0.47	7	0.79
10556	ribonuclease P/MRP 30kDa subunit	77	10.14	31	3.65	56	6.64	122	15.31	73	7.36	67	7.8	28	5.02	106	11.1	72	9.66	58	7.53	58	8.14	42	8.77	103	11.55	77	9.08	119	13.41
5908	RAP1B, member of RAS oncogene family	2349	309.45	6376	750.37	3618	429.16	1609	201.85	492	49.61	8000	931.44	3521	630.93	450	47.11	7779	1043.91	4917	638.32	4636	651.02	4458	931.24	7087	794.55	6479	764.22	5001	563.57
10287	regulator of G-protein signaling 19	668	88	2144	252.32	1971	233.8	621	77.91	1072	108.1	2182	254.05	1124	201.41	804	84.17	1206	161.84	1191	154.61	1207	169.5	963	201.16	1802	202.03	1462	172.45	1266	142.67
80224	nucleotide binding protein-like	68	8.96	21	2.47	21	2.49	96	12.04	13	1.31	19	2.21	16	2.87	37	3.87	38	5.1	25	3.25	30	4.21	13	2.72	43	4.82	49	5.78	67	7.55
4063	lymphocyte antigen 9	142	18.71	146	17.18	129	15.3	155	19.45	130	13.11	194	22.59	84	15.05	152	15.91	262	35.16	205	26.61	182	25.56	130	27.16	349	39.13	291	34.32	281	31.67
23179	ral guanine nucleotide dissociation stimulator-like 1	3	0.4	3	0.35	0	0	5	0.63	6	0.61	8	0.93	3	0.54	4	0.42	10	1.34	0	0	14	1.97	5	1.04	9	1.01	0	0	20	2.25
261726	TIP41, TOR signaling pathway regulator-like (S. cerevisiae)	53	6.98	88	10.36	92	10.91	148	18.57	462	46.59	65	7.57	70	12.54	572	59.88	65	8.72	83	10.77	62	8.71	56	11.7	119	13.34	92	10.85	100	11.27
5657	proteinase 3	0	0	0	0	0	0	9	1.13	4	0.4	0	0	0	0	2	0.21	6	0.81	0	0	0	0	2	0.42	3	0.34	4	0.47	9	1.01
57567	zinc finger protein 319	142	18.71	124	14.59	175	20.76	722	90.58	317	31.97	125	14.55	64	11.47	243	25.44	66	8.86	69	8.96	90	12.64	62	12.95	76	8.52	120	14.15	121	13.64
100129500	hypothetical protein LOC100129500	0	0	0	0	0	0	0	0	0	0	0	0	0	0	0	0	0	0	0	0	0	0	0	0	0	0	2	0.24	0	0
100130175	hypothetical protein LOC100130175	0	0	0	0	0	0	5	0.63	0	0	0	0	0	0	0	0	0	0	0	0	0	0	0	0	2	0.22	2	0.24	0	0
116362	retinol binding protein 7, cellular	58	7.64	141	16.59	227	26.93	36	4.52	153	15.43	246	28.64	158	28.31	180	18.84	117	15.7	115	14.93	147	20.64	118	24.65	151	16.93	151	17.81	129	14.54
51151	solute carrier family 45, member 2	0	0	4	0.47	6	0.71	0	0	5	0.5	0	0	0	0	0	0	2	0.27	0	0	0	0	0	0	3	0.34	0	0	0	0
6175	ribosomal protein, large, P0	4	0.53	21	2.47	9	1.07	12	1.51	0	0	34	3.96	41	7.35	0	0	555	74.48	418	54.26	306	42.97	333	69.56	100	11.21	177	20.88	147	16.57
134121	chromosome 5 open reading frame 49	0	0	2	0.24	0	0	0	0	0	0	0	0	0	0	0	0	0	0	0	0	0	0	0	0	0	0	0	0	0	0
9836	leucine carboxyl methyltransferase 2	6	0.79	5	0.59	12	1.42	7	0.88	15	1.51	13	1.51	16	2.87	21	2.2	17	2.28	13	1.69	3	0.42	5	1.04	16	1.79	14	1.65	26	2.93
430	achaete-scute complex homolog 2 (Drosophila)	35	4.61	26	3.06	24	2.85	74	9.28	105	10.59	31	3.61	22	3.94	186	19.47	32	4.29	19	2.47	26	3.65	18	3.76	15	1.68	17	2.01	13	1.46
79822	Rho GTPase activating protein 28	0	0	0	0	0	0	6	0.75	0	0	0	0	0	0	0	0	0	0	0	0	0	0	0	0	0	0	0	0	0	0
84190	chromosome 12 open reading frame 26	31	4.08	41	4.83	68	8.07	41	5.14	54	5.45	57	6.64	33	5.91	90	9.42	64	8.59	39	5.06	58	8.14	38	7.94	63	7.06	53	6.25	43	4.85
339366	ADAMTS-like 5	14	1.84	7	0.82	7	0.83	19	2.38	118	11.9	11	1.28	2	0.36	12	1.26	21	2.82	15	1.95	11	1.54	4	0.84	12	1.35	6	0.71	13	1.46
283553	hypothetical LOC283553	0	0	0	0	6	0.71	0	0	0	0	3	0.35	0	0	0	0	0	0	0	0	3	0.42	3	0.63	6	0.67	0	0	0	0
646819	similar to hCG1994130	17	2.24	0	0	0	0	0	0	0	0	3	0.35	0	0	0	0	0	0	0	0	0	0	0	0	0	0	0	0	6	0.68
25825	beta-site APP-cleaving enzyme 2	2	0.26	27	3.18	23	2.73	22	2.76	16	1.61	34	3.96	19	3.4	53	5.55	17	2.28	10	1.3	21	2.95	5	1.04	22	2.47	27	3.18	0	0
728743	similar to GLI-Kruppel family member HKR1	293	38.6	139	16.36	157	18.62	316	39.64	123	12.4	265	30.85	119	21.32	201	21.04	164	22.01	84	10.9	145	20.36	71	14.83	218	24.44	240	28.31	283	31.89
283420	C-type lectin domain family 9, member A	18	2.37	17	2	33	3.91	58	7.28	62	6.25	14	1.63	13	2.33	47	4.92	19	2.55	19	2.47	25	3.51	7	1.46	8	0.9	9	1.06	55	6.2
1911	polyhomeotic homolog 1 (Drosophila)	36	4.74	46	5.41	44	5.22	77	9.66	116	11.7	53	6.17	34	6.09	118	12.35	46	6.17	28	3.63	66	9.27	26	5.43	99	11.1	60	7.08	81	9.13
8871	synaptojanin 2	7	0.92	2	0.24	0	0	0	0	7	0.71	3	0.35	0	0	6	0.63	10	1.34	4	0.52	10	1.4	4	0.84	6	0.67	15	1.77	50	5.63
79183	tocopherol (alpha) transfer protein-like	59	7.77	58	6.83	74	8.78	154	19.32	89	8.97	93	10.83	44	7.88	66	6.91	91	12.21	63	8.18	76	10.67	56	11.7	112	12.56	89	10.5	77	8.68
30011	SH3-domain kinase binding protein 1	474	62.44	741	87.21	924	109.6	1548	194.2	773	77.95	792	92.21	540	96.76	1070	112.01	597	80.12	427	55.43	729	102.37	366	76.45	682	76.46	712	83.98	817	92.07
3306	heat shock 70kDa protein 2	14	1.84	3	0.35	8	0.95	0	0	0	0	13	1.51	3	0.54	0	0	16	2.15	3	0.39	15	2.11	6	1.25	7	0.78	11	1.3	4	0.45
10650	slowmo homolog 1 (Drosophila)	0	0	0	0	0	0	0	0	4	0.4	0	0	0	0	4	0.42	2	0.27	2	0.26	2	0.28	3	0.63	0	0	0	0	4	0.45
6608	smoothened homolog (Drosophila)	0	0	0	0	0	0	0	0	5	0.5	0	0	0	0	0	0	0	0	0	0	0	0	0	0	0	0	0	0	0	0
11274	ubiquitin specific peptidase 18	0	0	0	0	0	0	0	0	0	0	0	0	0	0	0	0	3	0.4	0	0	2	0.28	2	0.42	0	0	2	0.24	0	0
100130390	similar to hCG2045439	0	0	0	0	0	0	0	0	5	0.5	0	0	0	0	2	0.21	0	0	0	0	0	0	0	0	0	0	0	0	0	0
54476	ring finger protein 216	261	34.38	240	28.24	321	38.08	261	32.74	613	61.82	291	33.88	207	37.09	858	89.82	352	47.24	248	32.19	357	50.13	235	49.09	324	36.33	345	40.69	369	41.58
81614	non imprinted in Prader-Willi/Angelman syndrome 2	143	18.84	391	46.02	246	29.18	100	12.55	195	19.66	438	51	241	43.18	178	18.63	275	36.9	183	23.76	154	21.63	145	30.29	305	34.19	250	29.49	201	22.65
84674	caspase recruitment domain family, member 6	0	0	9	1.06	3	0.36	0	0	28	2.82	13	1.51	8	1.43	40	4.19	18	2.42	25	3.25	24	3.37	8	1.67	28	3.14	34	4.01	6	0.68
100132688	similar to Uncharacterized protein KIAA0220	0	0	2	0.24	0	0	0	0	0	0	2	0.23	3	0.54	0	0	5	0.67	2	0.26	5	0.7	0	0	2	0.22	4	0.47	3	0.34
100129961	hypothetical protein LOC100129961	0	0	3	0.35	0	0	3	0.38	12	1.21	0	0	4	0.72	0	0	3	0.4	5	0.65	0	0	3	0.63	3	0.34	12	1.42	13	1.46
9145	synaptogyrin 1	99	13.04	123	14.48	102	12.1	109	13.67	88	8.87	151	17.58	71	12.72	92	9.63	172	23.08	93	12.07	87	12.22	75	15.67	43	4.82	27	3.18	55	6.2
80012	polyhomeotic homolog 3 (Drosophila)	808	106.44	670	78.85	620	73.54	715	89.7	3582	361.21	781	90.93	465	83.32	3455	361.69	922	123.73	704	91.39	695	97.6	518	108.21	1099	123.21	1093	128.92	1159	130.61
4025	lactoperoxidase	2	0.26	0	0	0	0	0	0	0	0	0	0	0	0	0	0	0	0	0	0	0	0	0	0	0	0	0	0	0	0
100130126	hypothetical LOC100130126	0	0	2	0.24	0	0	0	0	0	0	0	0	0	0	0	0	0	0	0	0	0	0	0	0	0	0	0	0	3	0.34
63897	HEAT repeat containing 6	11	1.45	23	2.71	13	1.54	11	1.38	24	2.42	27	3.14	18	3.23	42	4.4	96	12.88	61	7.92	49	6.88	72	15.04	51	5.72	98	11.56	90	10.14
256586	LysM, putative peptidoglycan-binding, domain containing 2	111	14.62	247	29.07	315	37.36	60	7.53	0	0	281	32.72	186	33.33	0	0	322	43.21	208	27	242	33.98	280	58.49	302	33.86	274	32.32	259	29.19
3053	serpin peptidase inhibitor, clade D (heparin cofactor), member 1	0	0	0	0	0	0	0	0	8	0.81	0	0	0	0	0	0	0	0	0	0	0	0	0	0	0	0	0	0	0	0
100130401	similar to PRO0641	4	0.53	0	0	0	0	0	0	0	0	0	0	0	0	0	0	4	0.54	0	0	0	0	0	0	0	0	0	0	0	0
79645	EF-hand calcium binding domain 1	11	1.45	0	0	0	0	8	1	0	0	0	0	0	0	0	0	4	0.54	0	0	0	0	0	0	2	0.22	2	0.24	21	2.37
8997	kalirin, RhoGEF kinase	0	0	0	0	0	0	0	0	0	0	0	0	0	0	0	0	3	0.4	0	0	0	0	0	0	0	0	7	0.83	0	0
6473	short stature homeobox	2	0.26	0	0	0	0	0	0	3	0.3	0	0	0	0	0	0	0	0	0	0	0	0	0	0	0	0	0	0	0	0
90580	chromosome 19 open reading frame 52	24	3.16	17	2	37	4.39	34	4.27	40	4.03	26	3.03	20	3.58	90	9.42	44	5.9	33	4.28	31	4.35	23	4.8	26	2.91	43	5.07	25	2.82
9897	KIAA0196	210	27.66	185	21.77	215	25.5	682	85.56	40	4.03	200	23.29	163	29.21	98	10.26	263	35.29	188	24.41	176	24.72	159	33.21	270	30.27	270	31.85	262	29.53
100129563	similar to MSTP146	166	21.87	246	28.95	227	26.93	107	13.42	384	38.72	284	33.07	173	31	435	45.54	389	52.2	318	41.28	299	41.99	257	53.69	352	39.46	280	33.03	256	28.85
8665	eukaryotic translation initiation factor 3, subunit F	346	45.58	297	34.95	381	45.19	321	40.27	0	0	529	61.59	257	46.05	0	0	726	97.43	422	54.78	542	76.11	396	82.72	806	90.36	626	73.84	687	77.42
645687	similar to hCG1814265	6	0.79	0	0	0	0	6	0.75	0	0	3	0.35	0	0	0	0	0	0	0	0	0	0	0	0	0	0	3	0.35	2	0.23
51340	crooked neck pre-mRNA splicing factor-like 1 (Drosophila)	143	18.84	206	24.24	254	30.13	250	31.36	415	41.85	194	22.59	125	22.4	293	30.67	218	29.25	197	25.57	182	25.56	149	31.12	212	23.77	264	31.14	261	29.41
118788	phosphoinositide-3-kinase adaptor protein 1	286	37.68	798	93.91	764	90.62	150	18.82	2034	205.11	893	103.97	618	110.74	1702	178.17	801	107.49	606	78.67	651	91.42	663	138.5	873	97.88	575	67.82	542	61.08
6880	TAF9 RNA polymerase II, TATA box binding protein (TBP)-associated factor, 32kDa	123	16.2	172	20.24	179	21.23	222	27.85	144	14.52	285	33.18	181	32.43	88	9.21	284	38.11	243	31.55	195	27.38	173	36.14	344	38.57	236	27.84	207	23.33
64121	Ras-related GTP binding C	8	1.05	19	2.24	22	2.61	2	0.25	17	1.71	24	2.79	16	2.87	22	2.3	48	6.44	57	7.4	53	7.44	31	6.48	21	2.35	39	4.6	24	2.7
100132556	hypothetical protein LOC100132556	9	1.19	0	0	0	0	0	0	0	0	0	0	0	0	0	0	2	0.27	0	0	0	0	0	0	0	0	3	0.35	0	0
7033	trefoil factor 3 (intestinal)	0	0	2	0.24	2	0.24	0	0	13	1.31	8	0.93	8	1.43	26	2.72	5	0.67	0	0	0	0	0	0	3	0.34	6	0.71	0	0
28512	NFKB inhibitor interacting Ras-like 1	7	0.92	4	0.47	17	2.02	0	0	23	2.32	6	0.7	4	0.72	4	0.42	12	1.61	9	1.17	2	0.28	6	1.25	12	1.35	4	0.47	4	0.45
90141	chromosome 14 open reading frame 143	6	0.79	0	0	0	0	0	0	5	0.5	2	0.23	0	0	9	0.94	2	0.27	0	0	2	0.28	3	0.63	2	0.22	0	0	3	0.34
1121	choroideremia (Rab escort protein 1)	41	5.4	32	3.77	30	3.56	71	8.91	108	10.89	45	5.24	27	4.84	107	11.2	28	3.76	31	4.02	23	3.23	14	2.92	44	4.93	53	6.25	50	5.63
100131813	similar to hCG2041218	2	0.26	0	0	0	0	0	0	0	0	0	0	0	0	0	0	0	0	4	0.52	0	0	0	0	0	0	0	0	0	0
8448	double C2-like domains, alpha	2	0.26	0	0	2	0.24	0	0	0	0	0	0	0	0	2	0.21	4	0.54	4	0.52	2	0.28	0	0	0	0	0	0	0	0
342945	zinc finger and SCAN domain containing 22	11	1.45	11	1.29	2	0.24	2	0.25	6	0.61	12	1.4	5	0.9	12	1.26	7	0.94	7	0.91	0	0	2	0.42	8	0.9	6	0.71	6	0.68
3032	hydroxyacyl-Coenzyme A dehydrogenase/3-ketoacyl-Coenzyme A thiolase/enoyl-Coenzyme A hydratase (trifunctional protein), beta subunit	191	25.16	354	41.66	421	49.94	114	14.3	465	46.89	426	49.6	242	43.36	579	60.61	382	51.26	309	40.11	369	51.82	288	60.16	408	45.74	412	48.6	411	46.32
11018	transmembrane emp24 protein transport domain containing 1	8	1.05	10	1.18	15	1.78	15	1.88	74	7.46	17	1.98	19	3.4	52	5.44	28	3.76	13	1.69	8	1.12	27	5.64	18	2.02	20	2.36	8	0.9
58492	zinc finger protein 77	13	1.71	10	1.18	11	1.3	7	0.88	6	0.61	24	2.79	7	1.25	28	2.93	20	2.68	15	1.95	14	1.97	7	1.46	29	3.25	21	2.48	23	2.59
30844	EH-domain containing 4	59	7.77	36	4.24	48	5.69	186	23.33	62	6.25	68	7.92	40	7.17	131	13.71	54	7.25	50	6.49	62	8.71	51	10.65	80	8.97	76	8.96	70	7.89
55605	kinesin family member 21A	30	3.95	25	2.94	18	2.14	76	9.53	34	3.43	32	3.73	15	2.69	51	5.34	65	8.72	33	4.28	22	3.09	17	3.55	38	4.26	32	3.77	33	3.72
9424	potassium channel, subfamily K, member 6	42	5.53	45	5.3	42	4.98	50	6.27	6	0.61	68	7.92	33	5.91	24	2.51	53	7.11	40	5.19	45	6.32	34	7.1	51	5.72	55	6.49	54	6.09
221035	receptor accessory protein 3	31	4.08	93	10.94	55	6.52	8	1	57	5.75	103	11.99	39	6.99	46	4.82	22	2.95	41	5.32	41	5.76	40	8.36	113	12.67	42	4.95	39	4.39
100128343	hypothetical protein LOC100128343	0	0	0	0	0	0	0	0	19	1.92	0	0	0	0	10	1.05	0	0	2	0.26	0	0	0	0	0	0	0	0	0	0
284348	LY6/PLAUR domain containing 5	0	0	0	0	0	0	12	1.51	19	1.92	0	0	0	0	5	0.52	2	0.27	0	0	0	0	3	0.63	4	0.45	0	0	0	0
9227	lecithin retinol acyltransferase (phosphatidylcholine--retinol O-acyltransferase)	29	3.82	11	1.29	15	1.78	23	2.89	7	0.71	25	2.91	10	1.79	0	0	17	2.28	10	1.3	17	2.39	15	3.13	28	3.14	26	3.07	47	5.3
6369	chemokine (C-C motif) ligand 24	4	0.53	0	0	0	0	0	0	0	0	0	0	0	0	0	0	0	0	0	0	0	0	0	0	0	0	0	0	0	0
100132863	similar to hCG26831	0	0	0	0	0	0	0	0	0	0	0	0	0	0	0	0	0	0	2	0.26	0	0	2	0.42	0	0	0	0	0	0
400927	TPTE and PTEN homologous inositol lipid phosphatase pseudogene	969	127.65	20	2.35	16	1.9	104	13.05	29	2.92	16	1.86	14	2.51	26	2.72	58	7.78	76	9.87	14	1.97	107	22.35	13	1.46	75	8.85	200	22.54
9263	serine/threonine kinase 17a	362	47.69	662	77.91	846	100.35	630	79.04	505	50.92	713	83.01	413	74.01	288	30.15	865	116.08	596	77.37	541	75.97	424	88.57	768	86.1	826	97.43	917	103.34
246184	cell division cycle 26 homolog (S. cerevisiae)	0	0	0	0	0	0	0	0	0	0	0	0	0	0	3	0.31	0	0	0	0	0	0	0	0	0	0	0	0	0	0
64946	centromere protein H	5	0.66	3	0.35	0	0	0	0	0	0	9	1.05	0	0	0	0	4	0.54	10	1.3	4	0.56	9	1.88	10	1.12	2	0.24	5	0.56
26058	GRB10 interacting GYF protein 2	94	12.38	144	16.95	179	21.23	97	12.17	273	27.53	100	11.64	95	17.02	224	23.45	202	27.11	150	19.47	142	19.94	118	24.65	131	14.69	153	18.05	230	25.92
80258	EF-hand domain (C-terminal) containing 2	13	1.71	30	3.53	21	2.49	7	0.88	72	7.26	69	8.03	25	4.48	37	3.87	83	11.14	24	3.12	39	5.48	21	4.39	101	11.32	65	7.67	100	11.27
5158	phosphodiesterase 6B, cGMP-specific, rod, beta	25	3.29	7	0.82	22	2.61	8	1	26	2.62	20	2.33	17	3.05	63	6.6	33	4.43	15	1.95	16	2.25	8	1.67	40	4.48	19	2.24	13	1.46
100128716	hypothetical protein LOC100128716	2	0.26	3	0.35	5	0.59	9	1.13	0	0	4	0.47	0	0	2	0.21	4	0.54	2	0.26	4	0.56	2	0.42	3	0.34	6	0.71	0	0
729975	hypothetical protein LOC729975	0	0	0	0	0	0	0	0	0	0	0	0	0	0	0	0	0	0	2	0.26	0	0	0	0	5	0.56	0	0	0	0
56129	protocadherin beta 7	0	0	0	0	0	0	0	0	0	0	0	0	0	0	5	0.52	0	0	0	0	0	0	0	0	0	0	0	0	0	0
127495	leucine rich repeat containing 39	6	0.79	9	1.06	4	0.47	19	2.38	0	0	4	0.47	0	0	23	2.41	8	1.07	0	0	2	0.28	7	1.46	16	1.79	9	1.06	3	0.34
64146	peptide deformylase (mitochondrial)	0	0	0	0	0	0	0	0	13	1.31	0	0	0	0	12	1.26	0	0	0	0	0	0	0	0	0	0	0	0	0	0
374654	kinesin family member 7	0	0	0	0	0	0	2	0.25	0	0	0	0	0	0	0	0	0	0	0	0	0	0	0	0	0	0	4	0.47	0	0
11336	exocyst complex component 3	134	17.65	209	24.6	288	34.16	349	43.78	263	26.52	206	23.98	146	26.16	246	25.75	250	33.55	147	19.08	211	29.63	148	30.92	242	27.13	244	28.78	297	33.47
9184	BUB3 budding uninhibited by benzimidazoles 3 homolog (yeast)	437	57.57	365	42.96	470	55.75	676	84.81	169	17.04	406	47.27	281	50.35	321	33.6	597	80.12	413	53.61	407	57.15	325	67.89	636	71.3	579	68.29	785	88.46
55924	chromosome 1 open reading frame 183	78	10.28	65	7.65	85	10.08	86	10.79	220	22.19	46	5.36	36	6.45	238	24.91	53	7.11	50	6.49	34	4.77	27	5.64	61	6.84	79	9.32	67	7.55
729088	hypothetical protein LOC729088	0	0	0	0	0	0	0	0	13	1.31	0	0	0	0	10	1.05	0	0	0	0	0	0	0	0	0	0	0	0	0	0
81616	acyl-CoA synthetase bubblegum family member 2	4	0.53	0	0	0	0	0	0	0	0	0	0	0	0	0	0	0	0	0	0	0	0	0	0	0	0	0	0	4	0.45
4763	neurofibromin 1	86	11.33	84	9.89	129	15.3	104	13.05	133	13.41	99	11.53	78	13.98	202	21.15	137	18.38	100	12.98	123	17.27	65	13.58	120	13.45	162	19.11	131	14.76
23038	WD and tetratricopeptide repeats 1	133	17.52	447	52.61	508	60.26	104	13.05	243	24.5	384	44.71	303	54.29	177	18.53	362	48.58	262	34.01	318	44.66	200	41.78	417	46.75	383	45.18	361	40.68
50804	myelin expression factor 2	58	7.64	42	4.94	60	7.12	133	16.69	81	8.17	79	9.2	44	7.88	63	6.6	116	15.57	38	4.93	67	9.41	51	10.65	52	5.83	71	8.37	128	14.42
57414	rhomboid domain containing 2	69	9.09	223	26.24	174	20.64	76	9.53	159	16.03	282	32.83	116	20.79	154	16.12	152	20.4	143	18.56	166	23.31	128	26.74	230	25.79	167	19.7	139	15.66
221016	coiled-coil domain containing 7	3	0.4	2	0.24	0	0	4	0.5	0	0	5	0.58	0	0	8	0.84	0	0	6	0.78	0	0	2	0.42	0	0	6	0.71	0	0
169611	olfactomedin-like 2A	0	0	0	0	0	0	0	0	0	0	2	0.23	0	0	0	0	0	0	0	0	0	0	0	0	0	0	0	0	0	0
646509	hypothetical LOC646509	0	0	2	0.24	5	0.59	4	0.5	10	1.01	2	0.23	2	0.36	18	1.88	6	0.81	0	0	0	0	0	0	4	0.45	0	0	0	0
221060	chromosome 10 open reading frame 111	3	0.4	0	0	0	0	0	0	9	0.91	0	0	0	0	13	1.36	0	0	0	0	0	0	0	0	0	0	0	0	0	0
6717	sorcin	208	27.4	260	30.6	321	38.08	319	40.02	452	45.58	360	41.91	299	53.58	500	52.34	380	50.99	257	33.36	328	46.06	232	48.46	306	34.31	376	44.35	317	35.72
26063	2,4-dienoyl CoA reductase 2, peroxisomal	20	2.63	14	1.65	17	2.02	18	2.26	6	0.61	15	1.75	11	1.97	34	3.56	27	3.62	13	1.69	21	2.95	11	2.3	0	0	29	3.42	23	2.59
85437	zinc finger CCHC-type and RNA binding motif 1	54	7.11	75	8.83	81	9.61	119	14.93	76	7.66	73	8.5	55	9.86	55	5.76	123	16.51	78	10.13	56	7.86	37	7.73	106	11.88	91	10.73	96	10.82
6786	stromal interaction molecule 1	70	9.22	200	23.54	145	17.2	57	7.15	415	41.85	300	34.93	117	20.97	426	44.6	248	33.28	170	22.07	178	25	97	20.26	248	27.8	211	24.89	168	18.93
54455	F-box protein 42	100	13.17	148	17.42	185	21.94	232	29.11	137	13.82	174	20.26	126	22.58	105	10.99	207	27.78	153	19.86	174	24.43	127	26.53	236	26.46	177	20.88	226	25.47
158297	family with sequence similarity 154, member A	0	0	0	0	0	0	0	0	0	0	0	0	0	0	0	0	0	0	0	0	0	0	0	0	0	0	0	0	6	0.68
6881	TAF10 RNA polymerase II, TATA box binding protein (TBP)-associated factor, 30kDa	255	33.59	588	69.2	617	73.19	261	32.74	1289	129.98	718	83.6	449	80.46	1435	150.22	363	48.71	390	50.63	369	51.82	344	71.86	679	76.13	448	52.84	461	51.95
165324	UBX domain protein 2A	0	0	0	0	0	0	0	0	28	2.82	0	0	0	0	88	9.21	0	0	4	0.52	0	0	0	0	0	0	0	0	0	0
4597	mevalonate (diphospho) decarboxylase	144	18.97	129	15.18	137	16.25	262	32.87	16	1.61	198	23.05	99	17.74	30	3.14	201	26.97	91	11.81	106	14.89	89	18.59	202	22.65	98	11.56	148	16.68
5042	poly(A) binding protein, cytoplasmic 3	0	0	0	0	0	0	0	0	2	0.2	2	0.23	0	0	0	0	2	0.27	0	0	2	0.28	0	0	3	0.34	0	0	6	0.68
57498	kinase D-interacting substrate of 220 kDa	37	4.87	118	13.89	117	13.88	55	6.9	231	23.29	116	13.51	121	21.68	393	41.14	318	42.67	267	34.66	240	33.7	155	32.38	158	17.71	218	25.71	107	12.06
93624	transcriptional adaptor 2 (ADA2 homolog, yeast)-beta	59	7.77	128	15.06	128	15.18	71	8.91	413	41.65	110	12.81	98	17.56	472	49.41	152	20.4	125	16.23	119	16.71	111	23.19	128	14.35	190	22.41	145	16.34
26002	monooxygenase, DBH-like 1	0	0	2	0.24	2	0.24	4	0.5	0	0	0	0	0	0	0	0	4	0.54	0	0	0	0	0	0	4	0.45	0	0	0	0
100130027	hypothetical protein LOC100130027	0	0	0	0	0	0	0	0	4	0.4	0	0	0	0	0	0	0	0	0	0	0	0	0	0	0	0	0	0	0	0
3902	lymphocyte-activation gene 3	39	5.14	22	2.59	30	3.56	42	5.27	131	13.21	39	4.54	28	5.02	427	44.7	52	6.98	31	4.02	44	6.18	12	2.51	32	3.59	32	3.77	25	2.82
6347	chemokine (C-C motif) ligand 2	0	0	0	0	0	0	10	1.25	10	1.01	0	0	0	0	11	1.15	3	0.4	2	0.26	5	0.7	4	0.84	5	0.56	0	0	3	0.34
9879	DEAD (Asp-Glu-Ala-Asp) box polypeptide 46	411	54.14	419	49.31	470	55.75	607	76.15	619	62.42	577	67.18	344	61.64	588	61.55	608	81.59	411	53.36	500	70.21	323	67.47	623	69.85	611	72.07	634	71.45
7371	uridine-cytidine kinase 2	43	5.66	29	3.41	31	3.68	48	6.02	11	1.11	29	3.38	13	2.33	16	1.67	30	4.03	10	1.3	19	2.67	10	2.09	23	2.58	22	2.59	41	4.62
23190	UBX domain protein 4	543	71.53	885	104.15	931	110.43	750	94.09	750	75.63	812	94.54	564	101.06	755	79.04	905	121.45	603	78.28	774	108.69	391	81.68	876	98.21	758	89.41	852	96.01
84892	chromosome 3 open reading frame 39	18	2.37	15	1.77	10	1.19	11	1.38	16	1.61	32	3.73	15	2.69	9	0.94	30	4.03	23	2.99	14	1.97	7	1.46	37	4.15	21	2.48	5	0.56
283385	MORN repeat containing 3	11	1.45	8	0.94	3	0.36	47	5.9	10	1.01	9	1.05	2	0.36	30	3.14	10	1.34	0	0	13	1.83	0	0	8	0.9	8	0.94	23	2.59
100130776	similar to hCG2014417	0	0	0	0	0	0	0	0	4	0.4	0	0	0	0	9	0.94	0	0	0	0	2	0.28	0	0	0	0	0	0	0	0
642236	similar to FRG1 protein (FSHD region gene 1 protein)	47	6.19	48	5.65	34	4.03	204	25.59	0	0	19	2.21	2	0.36	0	0	23	3.09	19	2.47	20	2.81	18	3.76	19	2.13	6	0.71	24	2.7
55693	jumonji domain containing 2D	2	0.26	0	0	0	0	5	0.63	0	0	0	0	0	0	0	0	2	0.27	0	0	0	0	0	0	4	0.45	0	0	0	0
80149	zinc finger CCCH-type containing 12A	396	52.17	485	57.08	594	70.46	734	92.08	638	64.34	753	87.67	413	74.01	311	32.56	750	100.65	441	57.25	448	62.91	324	67.68	624	69.96	683	80.56	571	64.35
5789	protein tyrosine phosphatase, receptor type, D	4	0.53	0	0	0	0	0	0	0	0	0	0	0	0	0	0	0	0	0	0	0	0	2	0.42	0	0	0	0	4	0.45
25963	transmembrane protein 87A	150	19.76	151	17.77	175	20.76	403	50.56	204	20.57	245	28.53	139	24.91	161	16.85	276	37.04	195	25.31	194	27.24	143	29.87	187	20.97	190	22.41	258	29.07
85004	RAS-like, estrogen-regulated, growth inhibitor	0	0	0	0	0	0	0	0	0	0	0	0	0	0	0	0	0	0	0	0	0	0	0	0	0	0	0	0	3	0.34
91647	ATP synthase mitochondrial F1 complex assembly factor 2	31	4.08	27	3.18	47	5.58	83	10.41	38	3.83	56	6.52	25	4.48	31	3.25	62	8.32	43	5.58	55	7.72	45	9.4	66	7.4	77	9.08	29	3.27
140733	MACRO domain containing 2	16	2.11	0	0	10	1.19	17	2.13	10	1.01	25	2.91	6	1.08	24	2.51	10	1.34	10	1.3	6	0.84	2	0.42	7	0.78	12	1.42	5	0.56
9577	brain and reproductive organ-expressed (TNFRSF1A modulator)	435	57.31	464	54.61	342	40.57	405	50.81	209	21.08	657	76.49	298	53.4	389	40.72	595	79.85	436	56.6	585	82.15	480	100.27	563	63.12	673	79.38	906	102.1
3563	interleukin 3 receptor, alpha (low affinity)	24	3.16	57	6.71	61	7.24	59	7.4	60	6.05	111	12.92	35	6.27	50	5.23	18	2.42	12	1.56	12	1.69	23	4.8	65	7.29	38	4.48	42	4.73
401717	hypothetical LOC401717	0	0	0	0	0	0	0	0	0	0	0	0	0	0	0	0	6	0.81	0	0	0	0	4	0.84	0	0	4	0.47	3	0.34
84899	transmembrane and tetratricopeptide repeat containing 4	31	4.08	25	2.94	24	2.85	58	7.28	47	4.74	20	2.33	14	2.51	70	7.33	30	4.03	24	3.12	32	4.49	22	4.6	46	5.16	25	2.95	36	4.06
100129381	similar to mCG116065	0	0	0	0	0	0	0	0	0	0	0	0	0	0	0	0	2	0.27	0	0	0	0	0	0	0	0	0	0	0	0
125111	gap junction protein, delta 3, 31.9kDa	0	0	0	0	0	0	0	0	0	0	0	0	0	0	0	0	0	0	0	0	2	0.28	0	0	0	0	0	0	0	0
7940	leukocyte specific transcript 1	326	42.95	2025	238.32	1312	155.63	149	18.69	12968	1307.71	1489	173.36	935	167.54	13430	1405.92	483	64.82	471	61.14	558	78.36	491	102.57	1324	148.44	701	82.69	536	60.4
51513	ets variant gene 7 (TEL2 oncogene)	4	0.53	7	0.82	12	1.42	8	1	27	2.72	7	0.82	17	3.05	17	1.78	27	3.62	9	1.17	10	1.4	33	6.89	5	0.56	29	3.42	2	0.23
647135	SLIT-ROBO Rho GTPase-activating protein 2-like	0	0	0	0	0	0	0	0	0	0	0	0	0	0	0	0	0	0	0	0	2	0.28	0	0	0	0	0	0	0	0
712	complement component 1, q subcomponent, A chain	12	1.58	14	1.65	29	3.44	0	0	0	0	29	3.38	35	6.27	0	0	22	2.95	20	2.6	25	3.51	17	3.55	61	6.84	33	3.89	18	2.03
400657	hypothetical LOC400657	11	1.45	5	0.59	0	0	0	0	2	0.2	0	0	0	0	2	0.21	0	0	0	0	0	0	2	0.42	2	0.22	2	0.24	0	0
497189	TRAF-interacting protein with forkhead-associated domain, family member B	0	0	0	0	0	0	0	0	0	0	2	0.23	0	0	0	0	0	0	0	0	0	0	0	0	0	0	9	1.06	0	0
2317	filamin B, beta (actin binding protein 278)	50	6.59	26	3.06	31	3.68	141	17.69	61	6.15	76	8.85	62	11.11	123	12.88	70	9.39	53	6.88	61	8.57	47	9.82	60	6.73	83	9.79	32	3.61
135458	HUS1 checkpoint homolog b (S. pombe)	0	0	0	0	0	0	0	0	26	2.62	4	0.47	0	0	6	0.63	6	0.81	3	0.39	4	0.56	2	0.42	0	0	5	0.59	11	1.24
213	albumin	0	0	2	0.24	0	0	0	0	4	0.4	2	0.23	0	0	0	0	0	0	2	0.26	0	0	4	0.84	0	0	0	0	0	0
9570	golgi SNAP receptor complex member 2	25	3.29	22	2.59	32	3.8	40	5.02	43	4.34	39	4.54	24	4.3	93	9.74	70	9.39	46	5.97	41	5.76	29	6.06	40	4.48	53	6.25	120	13.52
29121	C-type lectin domain family 2, member D	1423	187.46	531	62.49	650	77.1	1787	224.19	749	75.53	839	97.68	443	79.38	1291	135.15	1169	156.88	686	89.06	760	106.73	661	138.08	1141	127.92	915	107.93	1307	147.29
84236	rhomboid domain containing 1	13	1.71	10	1.18	13	1.54	33	4.14	25	2.52	13	1.51	9	1.61	21	2.2	22	2.95	18	2.34	14	1.97	6	1.25	19	2.13	9	1.06	6	0.68
51010	exosome component 3	19	2.5	31	3.65	55	6.52	37	4.64	33	3.33	23	2.68	31	5.55	21	2.2	44	5.9	31	4.02	32	4.49	20	4.18	47	5.27	49	5.78	25	2.82
6542	solute carrier family 7 (cationic amino acid transporter, y+ system), member 2	4	0.53	0	0	0	0	0	0	0	0	0	0	0	0	0	0	0	0	0	0	0	0	0	0	0	0	0	0	2	0.23
400986	protein immuno-reactive with anti-PTH polyclonal antibodies	0	0	0	0	0	0	0	0	0	0	0	0	0	0	0	0	9	1.21	0	0	0	0	0	0	0	0	3	0.35	0	0
203259	chromosome 9 open reading frame 25	61	8.04	137	16.12	130	15.42	22	2.76	36	3.63	122	14.2	104	18.64	38	3.98	113	15.16	97	12.59	97	13.62	79	16.5	131	14.69	102	12.03	20	2.25
63826	serine racemase	50	6.59	44	5.18	26	3.08	36	4.52	13	1.31	47	5.47	19	3.4	15	1.57	32	4.29	24	3.12	29	4.07	12	2.51	32	3.59	38	4.48	50	5.63
5981	replication factor C (activator 1) 1, 145kDa	246	32.41	173	20.36	165	19.57	303	38.01	146	14.72	180	20.96	99	17.74	259	27.11	130	17.45	97	12.59	129	18.12	90	18.8	221	24.78	130	15.33	221	24.9
55197	regulation of nuclear pre-mRNA domain containing 1A	76	10.01	95	11.18	97	11.51	35	4.39	109	10.99	160	18.63	98	17.56	99	10.36	128	17.18	84	10.9	89	12.5	64	13.37	121	13.57	178	21	101	11.38
55119	PRP38 pre-mRNA processing factor 38 (yeast) domain containing B	575	75.75	848	99.8	956	113.4	738	92.58	658	66.35	858	99.9	679	121.67	445	46.58	855	114.74	753	97.75	702	98.58	496	103.61	1022	114.58	948	111.82	941	106.04
78996	chromosome 7 open reading frame 49	32	4.22	51	6	47	5.58	24	3.01	125	12.61	57	6.64	26	4.66	161	16.85	54	7.25	48	6.23	46	6.46	42	8.77	46	5.16	40	4.72	31	3.49
159013	chromosome X open reading frame 38	7	0.92	26	3.06	37	4.39	6	0.75	19	1.92	16	1.86	25	4.48	51	5.34	18	2.42	22	2.86	16	2.25	19	3.97	32	3.59	38	4.48	32	3.61
3151	high-mobility group nucleosomal binding domain 2	62	8.17	73	8.59	35	4.15	104	13.05	15	1.51	100	11.64	32	5.73	5	0.52	60	8.05	41	5.32	65	9.13	76	15.88	85	9.53	111	13.09	74	8.34
23142	DCN1, defective in cullin neddylation 1, domain containing 4 (S. cerevisiae)	64	8.43	76	8.94	51	6.05	129	16.18	60	6.05	113	13.16	49	8.78	105	10.99	105	14.09	80	10.39	80	11.23	67	14	155	17.38	103	12.15	120	13.52
4084	MAX dimerization protein 1	3831	504.68	12123	1426.71	15866	1882.01	3738	468.95	6142	619.37	10169	1183.98	9671	1732.95	4515	472.65	5936	796.59	5603	727.37	6260	879.08	4740	990.15	10297	1154.44	9978	1176.94	9225	1039.59
23116	family with sequence similarity 179, member B	31	4.08	21	2.47	34	4.03	98	12.29	19	1.92	23	2.68	13	2.33	11	1.15	44	5.9	28	3.63	37	5.2	28	5.85	54	6.05	38	4.48	39	4.39
9328	general transcription factor IIIC, polypeptide 5, 63kDa	105	13.83	130	15.3	126	14.95	109	13.67	296	29.85	122	14.2	72	12.9	393	41.14	194	26.03	129	16.75	157	22.05	126	26.32	174	19.51	141	16.63	224	25.24
29093	mitochondrial ribosomal protein L22	75	9.88	106	12.47	79	9.37	85	10.66	161	16.24	133	15.49	72	12.9	153	16.02	123	16.51	72	9.35	83	11.66	75	15.67	114	12.78	97	11.44	135	15.21
2878	glutathione peroxidase 3 (plasma)	5	0.66	18	2.12	17	2.02	10	1.25	12	1.21	12	1.4	3	0.54	19	1.99	40	5.37	14	1.82	21	2.95	12	2.51	8	0.9	5	0.59	18	2.03
160622	GRP1 (general receptor for phosphoinositides 1)-associated scaffold protein	10	1.32	6	0.71	2	0.24	19	2.38	19	1.92	9	1.05	5	0.9	0	0	8	1.07	5	0.65	9	1.26	11	2.3	0	0	6	0.71	4	0.45
56918	hypothetical protein DKFZp547H025	0	0	0	0	0	0	0	0	18	1.82	0	0	0	0	0	0	0	0	0	0	0	0	0	0	0	0	0	0	0	0
100134259	similar to hCG1987718	0	0	0	0	2	0.24	0	0	0	0	0	0	0	0	0	0	0	0	0	0	0	0	0	0	5	0.56	0	0	0	0
10225	CD96 molecule	168	22.13	88	10.36	127	15.06	346	43.41	224	22.59	127	14.79	77	13.8	313	32.77	278	37.31	173	22.46	151	21.2	140	29.24	195	21.86	256	30.2	301	33.92
5986	RFNG O-fucosylpeptide 3-beta-N-acetylglucosaminyltransferase	77	10.14	70	8.24	108	12.81	216	27.1	96	9.68	76	8.85	67	12.01	166	17.38	95	12.75	51	6.62	74	10.39	58	12.12	99	11.1	102	12.03	154	17.35
93	activin A receptor, type IIB	13	1.71	6	0.71	9	1.07	76	9.53	38	3.83	4	0.47	2	0.36	36	3.77	12	1.61	7	0.91	2	0.28	5	1.04	14	1.57	0	0	4	0.45
134492	NudC domain containing 2	71	9.35	67	7.89	76	9.02	37	4.64	245	24.71	124	14.44	57	10.21	274	28.68	183	24.56	118	15.32	105	14.74	83	17.34	137	15.36	122	14.39	128	14.42
54855	family with sequence similarity 46, member C	83	10.93	241	28.36	191	22.66	76	9.53	87	8.77	160	18.63	74	13.26	55	5.76	183	24.56	402	52.19	128	17.97	132	27.57	319	35.76	341	40.22	128	14.42
100128223	hypothetical protein LOC100128223	0	0	0	0	0	0	0	0	0	0	2	0.23	9	1.61	0	0	10	1.34	7	0.91	0	0	4	0.84	13	1.46	6	0.71	4	0.45
729911	hypothetical LOC729911	2	0.26	0	0	0	0	0	0	0	0	0	0	0	0	0	0	0	0	0	0	0	0	0	0	0	0	0	0	0	0
100129261	similar to high-mobility group box 3	0	0	0	0	0	0	0	0	0	0	2	0.23	0	0	0	0	0	0	0	0	0	0	2	0.42	0	0	0	0	0	0
83758	retinol binding protein 5, cellular	0	0	0	0	0	0	0	0	2	0.2	0	0	0	0	10	1.05	0	0	0	0	0	0	0	0	2	0.22	0	0	0	0
29851	inducible T-cell co-stimulator	38	5.01	34	4	32	3.8	20	2.51	32	3.23	64	7.45	10	1.79	90	9.42	37	4.97	32	4.15	55	7.72	23	4.8	131	14.69	73	8.61	86	9.69
57510	exportin 5	45	5.93	30	3.53	41	4.86	153	19.19	37	3.73	59	6.87	35	6.27	126	13.19	98	13.15	77	10	54	7.58	51	10.65	76	8.52	71	8.37	58	6.54
90987	zinc finger protein 251	58	7.64	30	3.53	31	3.68	59	7.4	73	7.36	68	7.92	16	2.87	80	8.37	70	9.39	47	6.1	68	9.55	59	12.32	70	7.85	58	6.84	59	6.65
55503	transient receptor potential cation channel, subfamily V, member 6	0	0	0	0	0	0	4	0.5	52	5.24	0	0	0	0	66	6.91	0	0	0	0	0	0	3	0.63	0	0	3	0.35	0	0
8854	aldehyde dehydrogenase 1 family, member A2	0	0	0	0	2	0.24	0	0	0	0	0	0	0	0	0	0	0	0	0	0	0	0	0	0	0	0	0	0	0	0
128360	olfactory receptor, family 10, subfamily T, member 2	0	0	0	0	0	0	0	0	0	0	0	0	0	0	0	0	2	0.27	0	0	0	0	0	0	2	0.22	0	0	0	0
401261	FLJ38717 protein	5	0.66	0	0	2	0.24	9	1.13	3	0.3	13	1.51	2	0.36	2	0.21	7	0.94	5	0.65	7	0.98	8	1.67	10	1.12	0	0	0	0
83746	l(3)mbt-like 2 (Drosophila)	32	4.22	55	6.47	41	4.86	32	4.01	61	6.15	85	9.9	39	6.99	30	3.14	97	13.02	73	9.48	81	11.37	81	16.92	66	7.4	63	7.43	79	8.9
27146	KIAA1276 protein	55	7.25	8	0.94	8	0.95	12	1.51	8	0.81	4	0.47	2	0.36	2	0.21	4	0.54	9	1.17	4	0.56	8	1.67	5	0.56	24	2.83	25	2.82
100130212	hypothetical protein LOC100130212	2	0.26	2	0.24	7	0.83	0	0	0	0	0	0	4	0.72	0	0	4	0.54	5	0.65	0	0	3	0.63	0	0	3	0.35	3	0.34
729484	hypothetical LOC729484	0	0	0	0	0	0	0	0	427	43.06	0	0	0	0	538	56.32	0	0	0	0	0	0	0	0	0	0	0	0	0	0
728599	similar to cytokine induced apoptosis inhibitor 1	2	0.26	0	0	0	0	0	0	0	0	0	0	0	0	0	0	0	0	0	0	0	0	0	0	0	0	0	0	0	0
8829	neuropilin 1	2	0.26	3	0.35	4	0.47	0	0	10	1.01	6	0.7	3	0.54	3	0.31	18	2.42	2	0.26	10	1.4	9	1.88	9	1.01	17	2.01	4	0.45
57639	coiled-coil domain containing 146	21	2.77	27	3.18	61	7.24	86	10.79	99	9.98	33	3.84	36	6.45	93	9.74	44	5.9	35	4.54	39	5.48	26	5.43	19	2.13	42	4.95	17	1.92
57560	intraflagellar transport 80 homolog (Chlamydomonas)	86	11.33	118	13.89	109	12.93	67	8.41	143	14.42	143	16.65	81	14.51	175	18.32	130	17.45	105	13.63	73	10.25	87	18.17	160	17.94	136	16.04	61	6.87
8208	chromatin assembly factor 1, subunit B (p60)	7	0.92	11	1.29	8	0.95	15	1.88	3	0.3	18	2.1	3	0.54	5	0.52	17	2.28	6	0.78	19	2.67	5	1.04	21	2.35	13	1.53	26	2.93
894	cyclin D2	216	28.46	149	17.54	225	26.69	323	40.52	839	84.61	245	28.53	131	23.47	1343	140.59	373	50.06	267	34.66	238	33.42	224	46.79	250	28.03	268	31.61	228	25.69
22807	IKAROS family zinc finger 2 (Helios)	71	9.35	84	9.89	77	9.13	58	7.28	33	3.33	79	9.2	84	15.05	53	5.55	101	13.55	77	10	52	7.3	64	13.37	112	12.56	113	13.33	119	13.41
22861	NLR family, pyrin domain containing 1	356	46.9	706	83.09	893	105.93	288	36.13	1870	188.57	771	89.77	565	101.24	2761	289.03	756	101.45	618	80.23	919	129.05	580	121.16	943	105.72	1083	127.74	915	103.11
80115	BAI1-associated protein 2-like 2	4	0.53	8	0.94	7	0.83	0	0	15	1.51	4	0.47	3	0.54	25	2.62	10	1.34	11	1.43	11	1.54	6	1.25	51	5.72	39	4.6	33	3.72
729683	hypothetical protein LOC729683	25	3.29	31	3.65	32	3.8	23	2.89	156	15.73	44	5.12	20	3.58	389	40.72	34	4.56	34	4.41	26	3.65	31	6.48	46	5.16	56	6.61	43	4.85
196477	chromosome 12 open reading frame 12	0	0	0	0	0	0	4	0.5	0	0	0	0	0	0	0	0	0	0	0	0	0	0	0	0	0	0	0	0	0	0
126868	chromosome 1 open reading frame 161	2	0.26	0	0	0	0	0	0	403	40.64	0	0	0	0	222	23.24	0	0	0	0	0	0	0	0	2	0.22	2	0.24	0	0
442299	similar to capicua homolog	0	0	0	0	0	0	0	0	0	0	0	0	2	0.36	0	0	0	0	0	0	0	0	0	0	0	0	0	0	0	0
79034	chromosome 7 open reading frame 26	257	33.86	227	26.71	307	36.42	834	104.63	233	23.5	252	29.34	171	30.64	335	35.07	479	64.28	266	34.53	430	60.38	297	62.04	315	35.32	359	42.35	482	54.32
56986	DTW domain containing 1	31	4.08	22	2.59	33	3.91	45	5.65	6	0.61	35	4.08	12	2.15	10	1.05	50	6.71	33	4.28	31	4.35	28	5.85	39	4.37	49	5.78	75	8.45
55331	phytoceramidase, alkaline	27	3.56	23	2.71	34	4.03	62	7.78	28	2.82	47	5.47	18	3.23	26	2.72	52	6.98	28	3.63	38	5.34	31	6.48	68	7.62	54	6.37	85	9.58
84959	ubiquitin associated and SH3 domain containing, B	55	7.25	84	9.89	170	20.17	83	10.41	122	12.3	89	10.36	69	12.36	135	14.13	86	11.54	71	9.22	98	13.76	60	12.53	145	16.26	154	18.16	112	12.62
523	ATPase, H+ transporting, lysosomal 70kDa, V1 subunit A	247	32.54	639	75.2	933	110.67	580	72.76	1549	156.2	715	83.25	447	80.1	1084	113.48	592	79.44	516	66.99	656	92.12	391	81.68	689	77.25	707	83.39	722	81.36
2926	G-rich RNA sequence binding factor 1	152	20.02	137	16.12	167	19.81	434	54.45	612	61.71	198	23.05	115	20.61	1040	108.87	344	46.16	263	34.14	244	34.26	185	38.64	293	32.85	252	29.72	247	27.83
440122	hCG1646157	0	0	0	0	2	0.24	0	0	0	0	0	0	0	0	3	0.31	6	0.81	7	0.91	6	0.84	0	0	7	0.78	0	0	7	0.79
26160	intraflagellar transport 172 homolog (Chlamydomonas)	11	1.45	14	1.65	11	1.3	20	2.51	29	2.92	8	0.93	6	1.08	64	6.7	38	5.1	8	1.04	33	4.63	15	3.13	16	1.79	41	4.84	58	6.54
113115	family with sequence similarity 54, member A	7	0.92	10	1.18	9	1.07	43	5.39	0	0	2	0.23	2	0.36	11	1.15	8	1.07	4	0.52	20	2.81	4	0.84	6	0.67	18	2.12	2	0.23
64983	mitochondrial ribosomal protein L32	52	6.85	62	7.3	92	10.91	63	7.9	122	12.3	83	9.66	61	10.93	199	20.83	85	11.41	72	9.35	77	10.81	74	15.46	92	10.31	121	14.27	83	9.35
26574	apoptosis antagonizing transcription factor	165	21.74	384	45.19	309	36.65	520	65.24	324	32.67	402	46.8	190	34.05	314	32.87	351	47.1	231	29.99	357	50.13	232	48.46	299	33.52	352	41.52	397	44.74
9703	KIAA0100	66	8.69	165	19.42	170	20.17	175	21.95	204	20.57	187	21.77	134	24.01	345	36.12	275	36.9	241	31.29	205	28.79	202	42.2	206	23.1	238	28.07	217	24.45
5933	retinoblastoma-like 1 (p107)	20	2.63	5	0.59	3	0.36	22	2.76	12	1.21	13	1.51	0	0	0	0	22	2.95	5	0.65	7	0.98	4	0.84	13	1.46	12	1.42	16	1.8
22856	chondroitin sulfate synthase 1	294	38.73	648	76.26	1049	124.43	519	65.11	658	66.35	338	39.35	179	32.08	617	64.59	302	40.53	266	34.53	327	45.92	206	43.03	502	56.28	499	58.86	618	69.64
84720	phosphatidylinositol glycan anchor biosynthesis, class O	33	4.35	14	1.65	35	4.15	121	15.18	36	3.63	22	2.56	21	3.76	178	18.63	74	9.93	43	5.58	56	7.86	46	9.61	58	6.5	57	6.72	65	7.32
8405	speckle-type POZ protein	90	11.86	168	19.77	262	31.08	155	19.45	449	45.28	181	21.07	115	20.61	347	36.33	163	21.87	121	15.71	183	25.7	94	19.64	168	18.84	223	26.3	162	18.26
54704	protein phosphatase 2C, magnesium-dependent, catalytic subunit	175	23.05	107	12.59	138	16.37	124	15.56	93	9.38	241	28.06	153	27.42	135	14.13	432	57.97	258	33.49	299	41.99	306	63.92	238	26.68	287	33.85	294	33.13
728368	hypothetical LOC728368	0	0	0	0	0	0	0	0	0	0	0	0	0	0	0	0	0	0	3	0.39	5	0.7	0	0	3	0.34	0	0	4	0.45
150197	hypothetical protein FLJ32575	0	0	3	0.35	0	0	0	0	0	0	0	0	0	0	0	0	0	0	0	0	0	0	3	0.63	0	0	0	0	10	1.13
283847	coiled-coil domain containing 79	4	0.53	0	0	0	0	0	0	0	0	0	0	0	0	0	0	4	0.54	2	0.26	0	0	0	0	0	0	0	0	0	0
7617	zinc finger protein 66	2	0.26	2	0.24	0	0	0	0	0	0	0	0	0	0	4	0.42	0	0	0	0	0	0	0	0	6	0.67	0	0	0	0
200942	kelch domain containing 8B	14	1.84	12	1.41	33	3.91	45	5.65	38	3.83	12	1.4	13	2.33	121	12.67	46	6.17	40	5.19	43	6.04	35	7.31	48	5.38	69	8.14	85	9.58
23024	PDZ domain containing ring finger 3	0	0	0	0	0	0	0	0	0	0	0	0	0	0	3	0.31	0	0	0	0	0	0	0	0	0	0	0	0	0	0
400823	family with sequence similarity 177, member B	8	1.05	0	0	3	0.36	3	0.38	7	0.71	4	0.47	2	0.36	4	0.42	7	0.94	2	0.26	2	0.28	2	0.42	4	0.45	24	2.83	5	0.56
81831	neuropilin (NRP) and tolloid (TLL)-like 2	61	8.04	75	8.83	57	6.76	46	5.77	3	0.3	67	7.8	34	6.09	11	1.15	61	8.19	56	7.27	67	9.41	34	7.1	59	6.61	67	7.9	106	11.95
2593	guanidinoacetate N-methyltransferase	18	2.37	4	0.47	4	0.47	36	4.52	19	1.92	18	2.1	2	0.36	33	3.45	6	0.81	5	0.65	13	1.83	9	1.88	21	2.35	19	2.24	9	1.01
81609	sorting nexin family member 27	549	72.32	664	78.14	1069	126.8	1469	184.29	88	8.87	695	80.92	719	128.84	69	7.22	605	81.19	521	67.64	623	87.49	363	75.83	706	79.15	766	90.35	919	103.56
165	AE binding protein 1	5	0.66	6	0.71	2	0.24	19	2.38	69	6.96	29	3.38	5	0.9	59	6.18	13	1.74	15	1.95	11	1.54	11	2.3	12	1.35	14	1.65	26	2.93
126364	leucine rich repeat containing 25	51	6.72	204	24.01	216	25.62	27	3.39	1623	163.66	144	16.77	154	27.6	1896	198.48	204	27.38	208	27	171	24.01	182	38.02	185	20.74	236	27.84	181	20.4
8347	histone cluster 1, H2bc	75	9.88	203	23.89	187	22.18	120	15.05	0	0	162	18.86	76	13.62	0	0	52	6.98	20	2.6	48	6.74	23	4.8	107	12	92	10.85	150	16.9
1649	DNA-damage-inducible transcript 3	186	24.5	503	59.2	355	42.11	79	9.91	463	46.69	578	67.3	197	35.3	126	13.19	393	52.74	219	28.43	265	37.21	192	40.11	629	70.52	634	74.78	409	46.09
10768	S-adenosylhomocysteine hydrolase-like 1	140	18.44	354	41.66	348	41.28	73	9.16	176	17.75	389	45.29	277	49.64	216	22.61	342	45.9	354	45.96	293	41.15	215	44.91	459	51.46	352	41.52	325	36.62
146857	schlafen family member 13	303	39.92	77	9.06	52	6.17	194	24.34	682	68.77	96	11.18	36	6.45	683	71.5	84	11.27	61	7.92	42	5.9	51	10.65	68	7.62	65	7.67	113	12.73
9238	transforming growth factor beta regulator 4	113	14.89	131	15.42	97	11.51	158	19.82	235	23.7	212	24.68	84	15.05	267	27.95	201	26.97	142	18.43	186	26.12	132	27.57	181	20.29	190	22.41	189	21.3
9550	ATPase, H+ transporting, lysosomal 13kDa, V1 subunit G1	147	19.37	481	56.61	441	52.31	124	15.56	227	22.89	812	94.54	338	60.57	195	20.41	700	93.94	474	61.53	533	74.85	420	87.73	772	86.55	596	70.3	462	52.06
1012	cadherin 13, H-cadherin (heart)	2	0.26	0	0	0	0	4	0.5	46	4.64	0	0	3	0.54	57	5.97	0	0	0	0	0	0	0	0	0	0	4	0.47	13	1.46
51077	FCF1 small subunit (SSU) processome component homolog (S. cerevisiae)	303	39.92	129	15.18	119	14.12	196	24.59	100	10.08	102	11.88	57	10.21	69	7.22	180	24.16	122	15.84	122	17.13	87	18.17	136	15.25	129	15.22	168	18.93
165631	poly (ADP-ribose) polymerase family, member 15	17	2.24	37	4.35	41	4.86	3	0.38	22	2.22	38	4.42	16	2.87	43	4.5	97	13.02	38	4.93	46	6.46	36	7.52	62	6.95	43	5.07	48	5.41
2266	fibrinogen gamma chain	0	0	0	0	0	0	0	0	0	0	0	0	0	0	0	0	0	0	0	0	0	0	0	0	0	0	0	0	3	0.34
23765	interleukin 17 receptor A	59	7.77	176	20.71	162	19.22	119	14.93	244	24.61	198	23.05	98	17.56	288	30.15	95	12.75	108	14.02	136	19.1	93	19.43	236	26.46	226	26.66	171	19.27
84823	lamin B2	41	5.4	43	5.06	44	5.22	31	3.89	58	5.85	79	9.2	36	6.45	144	15.07	82	11	37	4.8	56	7.86	32	6.68	89	9.98	61	7.2	52	5.86
412	steroid sulfatase (microsomal), isozyme S	13	1.71	27	3.18	29	3.44	10	1.25	34	3.43	25	2.91	20	3.58	126	13.19	58	7.78	35	4.54	29	4.07	21	4.39	40	4.48	55	6.49	41	4.62
144402	copine VIII	26	3.43	36	4.24	45	5.34	63	7.9	84	8.47	57	6.64	30	5.38	80	8.37	94	12.61	52	6.75	106	14.89	64	13.37	60	6.73	53	6.25	73	8.23
27044	staphylococcal nuclease and tudor domain containing 1	243	32.01	323	38.01	251	29.77	224	28.1	203	20.47	495	57.63	194	34.76	318	33.29	463	62.13	285	37	459	64.46	339	70.81	434	48.66	440	51.9	403	45.41
2650	glucosaminyl (N-acetyl) transferase 1, core 2 (beta-1,6-N-acetylglucosaminyltransferase)	58	7.64	18	2.12	22	2.61	41	5.14	5	0.5	33	3.84	25	4.48	58	6.07	34	4.56	42	5.45	47	6.6	22	4.6	43	4.82	30	3.54	28	3.16
10314	LanC lantibiotic synthetase component C-like 1 (bacterial)	47	6.19	51	6	69	8.18	87	10.91	374	37.71	60	6.99	41	7.35	470	49.2	185	24.83	91	11.81	121	16.99	71	14.83	144	16.14	98	11.56	70	7.89
22882	zinc fingers and homeoboxes 2	44	5.8	89	10.47	85	10.08	86	10.79	65	6.55	116	13.51	95	17.02	81	8.48	141	18.92	93	12.07	120	16.85	75	15.67	126	14.13	134	15.81	82	9.24
1939	ligatin	38	5.01	33	3.88	45	5.34	169	21.2	372	37.51	54	6.29	37	6.63	910	95.26	75	10.06	64	8.31	64	8.99	56	11.7	73	8.18	59	6.96	106	11.95
2201	fibrillin 2	6	0.79	13	1.53	11	1.3	3	0.38	0	0	16	1.86	7	1.25	6	0.63	17	2.28	9	1.17	39	5.48	28	5.85	15	1.68	22	2.59	10	1.13
114900	C1q and tumor necrosis factor related protein 4	4	0.53	6	0.71	0	0	5	0.63	0	0	3	0.35	0	0	3	0.31	3	0.4	0	0	0	0	0	0	0	0	0	0	3	0.34
22868	FAST kinase domains 2	87	11.46	47	5.53	75	8.9	136	17.06	38	3.83	70	8.15	33	5.91	79	8.27	124	16.64	73	9.48	75	10.53	59	12.32	124	13.9	67	7.9	170	19.16
100131510	hypothetical LOC100131510	25	3.29	0	0	3	0.36	3	0.38	0	0	4	0.47	0	0	0	0	18	2.42	8	1.04	4	0.56	0	0	0	0	3	0.35	4	0.45
9752	protocadherin alpha 9	15	1.98	0	0	0	0	11	1.38	0	0	0	0	0	0	0	0	0	0	3	0.39	0	0	0	0	3	0.34	0	0	0	0
54968	transmembrane protein 70	112	14.75	169	19.89	198	23.49	41	5.14	112	11.29	145	16.88	152	27.24	80	8.37	148	19.86	100	12.98	113	15.87	72	15.04	129	14.46	127	14.98	143	16.11
4701	NADH dehydrogenase (ubiquinone) 1 alpha subcomplex, 7, 14.5kDa	4	0.53	7	0.82	12	1.42	12	1.51	183	18.45	17	1.98	3	0.54	267	27.95	26	3.49	13	1.69	16	2.25	14	2.92	10	1.12	15	1.77	9	1.01
100131782	hypothetical protein LOC100131782	2	0.26	0	0	0	0	0	0	0	0	0	0	0	0	0	0	0	0	0	0	0	0	0	0	0	0	0	0	0	0
5367	pro-melanin-concentrating hormone	0	0	4	0.47	0	0	0	0	0	0	0	0	0	0	0	0	0	0	0	0	0	0	0	0	0	0	0	0	0	0
84612	par-6 partitioning defective 6 homolog beta (C. elegans)	38	5.01	23	2.71	20	2.37	46	5.77	9	0.91	28	3.26	4	0.72	8	0.84	37	4.97	15	1.95	13	1.83	28	5.85	16	1.79	35	4.13	35	3.94
11284	polynucleotide kinase 3'-phosphatase	30	3.95	65	7.65	87	10.32	25	3.14	148	14.92	91	10.6	57	10.21	125	13.09	66	8.86	50	6.49	75	10.53	36	7.52	89	9.98	94	11.09	42	4.73
22998	LIM and calponin homology domains 1	12	1.58	2	0.24	0	0	9	1.13	2	0.2	0	0	0	0	2	0.21	2	0.27	0	0	5	0.7	0	0	0	0	0	0	0	0
5175	platelet/endothelial cell adhesion molecule	908	119.62	3079	362.36	3016	357.75	952	119.43	1026	103.46	3060	356.28	2257	404.43	991	103.74	2878	386.22	2388	310.01	2630	369.33	1990	415.69	2701	302.82	2876	339.23	2528	284.89
79840	nonhomologous end-joining factor 1	39	5.14	29	3.41	57	6.76	189	23.71	121	12.2	39	4.54	20	3.58	75	7.85	39	5.23	34	4.41	52	7.3	33	6.89	34	3.81	48	5.66	91	10.25
4133	microtubule-associated protein 2	10	1.32	10	1.18	0	0	0	0	0	0	2	0.23	3	0.54	0	0	0	0	0	0	2	0.28	0	0	3	0.34	2	0.24	33	3.72
7071	Kruppel-like factor 10	177	23.32	365	42.96	221	26.21	555	69.63	208	20.97	412	47.97	153	27.42	123	12.88	451	60.52	260	33.75	446	62.63	188	39.27	423	47.42	396	46.71	484	54.54
221002	RasGEF domain family, member 1A	34	4.48	36	4.24	45	5.34	43	5.39	95	9.58	26	3.03	14	2.51	154	16.12	46	6.17	48	6.23	37	5.2	26	5.43	46	5.16	46	5.43	66	7.44
83878	Usher syndrome 1C binding protein 1	0	0	0	0	0	0	0	0	0	0	0	0	0	0	0	0	0	0	0	0	0	0	0	0	0	0	0	0	6	0.68
51557	glutamate-ammonia ligase (glutamine synthetase) domain containing 1	0	0	0	0	0	0	4	0.5	0	0	7	0.82	0	0	0	0	7	0.94	2	0.26	5	0.7	3	0.63	0	0	3	0.35	0	0
5443	proopiomelanocortin	14	1.84	6	0.71	12	1.42	34	4.27	0	0	5	0.58	0	0	0	0	4	0.54	4	0.52	0	0	2	0.42	0	0	2	0.24	4	0.45
7317	ubiquitin-like modifier activating enzyme 1	185	24.37	627	73.79	652	77.34	559	70.13	1533	154.59	632	73.58	651	116.65	1334	139.65	1051	141.04	719	93.34	1188	166.83	645	134.73	729	81.73	1008	118.9	1036	116.75
54529	asparagine synthetase domain containing 1	128	16.86	184	21.65	301	35.7	441	55.33	333	33.58	148	17.23	158	28.31	294	30.78	299	40.12	163	21.16	155	21.77	108	22.56	281	31.5	291	34.32	287	32.34
90199	WAP four-disulfide core domain 8	3	0.4	0	0	0	0	0	0	4	0.4	7	0.82	0	0	0	0	2	0.27	0	0	0	0	2	0.42	0	0	3	0.35	2	0.23
83877	TM2 domain containing 2	37	4.87	43	5.06	60	7.12	174	21.83	145	14.62	35	4.08	48	8.6	227	23.76	70	9.39	65	8.44	53	7.44	57	11.91	119	13.34	77	9.08	75	8.45
646043	similar to Enhancer of bithorax CG32346-PB, isoform B	17	2.24	2	0.24	4	0.47	0	0	3	0.3	2	0.23	4	0.72	9	0.94	4	0.54	2	0.26	0	0	5	1.04	0	0	0	0	10	1.13
58499	zinc finger protein 462	0	0	0	0	0	0	2	0.25	0	0	2	0.23	0	0	0	0	0	0	0	0	0	0	0	0	4	0.45	0	0	0	0
10175	cornichon homolog (Drosophila)	124	16.34	128	15.06	148	17.56	54	6.77	110	11.09	216	25.15	169	30.28	77	8.06	221	29.66	174	22.59	134	18.82	114	23.81	197	22.09	188	22.18	174	19.61
27074	lysosomal-associated membrane protein 3	16	2.11	5	0.59	4	0.47	9	1.13	9	0.91	9	1.05	5	0.9	7	0.73	9	1.21	4	0.52	11	1.54	11	2.3	0	0	7	0.83	0	0
65980	bromodomain containing 9	74	9.75	95	11.18	87	10.32	117	14.68	33	3.33	98	11.41	59	10.57	74	7.75	174	23.35	130	16.88	164	23.03	152	31.75	104	11.66	135	15.92	153	17.24
10952	Sec61 beta subunit	226	29.77	354	41.66	327	38.79	181	22.71	299	30.15	375	43.66	244	43.72	439	45.96	317	42.54	213	27.65	264	37.07	149	31.12	411	46.08	273	32.2	368	41.47
653053	hypothetical LOC653053	0	0	0	0	0	0	0	0	23	2.32	0	0	0	0	26	2.72	0	0	0	0	0	0	0	0	0	0	0	0	0	0
2627	GATA binding protein 6	2	0.26	2	0.24	0	0	5	0.63	0	0	4	0.47	5	0.9	0	0	5	0.67	0	0	0	0	2	0.42	4	0.45	5	0.59	6	0.68
142940	TruB pseudouridine (psi) synthase homolog 1 (E. coli)	16	2.11	27	3.18	15	1.78	14	1.76	22	2.22	31	3.61	20	3.58	40	4.19	104	13.96	64	8.31	43	6.04	41	8.56	48	5.38	60	7.08	68	7.66
55135	WD repeat domain 79	12	1.58	6	0.71	10	1.19	16	2.01	103	10.39	19	2.21	8	1.43	133	13.92	14	1.88	12	1.56	27	3.79	7	1.46	6	0.67	19	2.24	19	2.14
84456	l(3)mbt-like 3 (Drosophila)	136	17.92	152	17.89	168	19.93	231	28.98	113	11.4	190	22.12	88	15.77	77	8.06	99	13.29	64	8.31	104	14.6	74	15.46	199	22.31	114	13.45	92	10.37
58191	chemokine (C-X-C motif) ligand 16	54	7.11	205	24.13	195	23.13	56	7.03	1002	101.04	184	21.42	132	23.65	445	46.58	137	18.38	130	16.88	196	27.52	110	22.98	263	29.49	240	28.31	132	14.88
83857	transmembrane and tetratricopeptide repeat containing 1	238	31.35	61	7.18	85	10.08	75	9.41	2	0.2	43	5.01	60	10.75	28	2.93	61	8.19	55	7.14	33	4.63	85	17.76	153	17.15	162	19.11	212	23.89
51535	periphilin 1	70	9.22	70	8.24	96	11.39	144	18.07	76	7.66	98	11.41	79	14.16	80	8.37	198	26.57	145	18.82	139	19.52	112	23.4	164	18.39	165	19.46	223	25.13
10460	transforming, acidic coiled-coil containing protein 3	487	64.16	1615	190.06	1560	185.05	472	59.21	619	62.42	1219	141.93	728	130.45	587	61.45	739	99.17	612	79.45	751	105.46	402	83.97	1533	171.87	972	114.65	770	86.77
2149	coagulation factor II (thrombin) receptor	133	17.52	74	8.71	105	12.45	555	69.63	131	13.21	97	11.29	58	10.39	172	18.01	381	51.13	264	34.27	120	16.85	82	17.13	187	20.97	123	14.51	175	19.72
56969	ribosomal protein L23a pseudogene 13	4	0.53	0	0	0	0	0	0	16	1.61	0	0	0	0	26	2.72	0	0	0	0	5	0.7	0	0	0	0	0	0	0	0
730074	hypothetical LOC730074	0	0	2	0.24	0	0	0	0	0	0	0	0	0	0	0	0	0	0	0	0	0	0	0	0	0	0	0	0	2	0.23
26262	tetraspanin 17	91	11.99	100	11.77	62	7.35	97	12.17	82	8.27	133	15.49	79	14.16	108	11.31	139	18.65	124	16.1	113	15.87	67	14	196	21.97	130	15.33	83	9.35
27072	vacuolar protein sorting 41 homolog (S. cerevisiae)	66	8.69	68	8	99	11.74	97	12.17	153	15.43	93	10.83	84	15.05	147	15.39	94	12.61	65	8.44	67	9.41	45	9.4	101	11.32	89	10.5	56	6.31
8321	frizzled homolog 1 (Drosophila)	20	2.63	11	1.29	16	1.9	26	3.26	5	0.5	13	1.51	17	3.05	11	1.15	33	4.43	35	4.54	41	5.76	33	6.89	51	5.72	65	7.67	58	6.54
84641	hippocampus abundant transcript-like 1	312	41.1	258	30.36	516	61.21	1077	135.11	119	12	254	29.57	226	40.5	174	18.22	467	62.67	398	51.67	468	65.72	352	73.53	630	70.63	669	78.91	788	88.8
79865	triggering receptor expressed on myeloid cells-like 2	383	50.46	728	85.68	747	88.61	661	82.92	378	38.12	990	115.27	517	92.64	103	10.78	523	70.18	342	44.4	567	79.62	354	73.95	498	55.83	605	71.36	533	60.06
1141	cholinergic receptor, nicotinic, beta 2 (neuronal)	0	0	0	0	0	0	0	0	0	0	0	0	0	0	6	0.63	3	0.4	0	0	0	0	0	0	0	0	3	0.35	0	0
9631	nucleoporin 155kDa	20	2.63	28	3.3	21	2.49	14	1.76	90	9.08	34	3.96	18	3.23	115	12.04	57	7.65	22	2.86	23	3.23	19	3.97	66	7.4	55	6.49	35	3.94
863	core-binding factor, runt domain, alpha subunit 2; translocated to, 3	156	20.55	225	26.48	338	40.09	370	46.42	62	6.25	204	23.75	179	32.08	72	7.54	93	12.48	47	6.1	194	27.24	83	17.34	112	12.56	145	17.1	105	11.83
729954	hypothetical LOC729954	0	0	0	0	0	0	0	0	0	0	2	0.23	0	0	0	0	0	0	0	0	0	0	0	0	0	0	0	0	3	0.34
135154	chromosome 6 open reading frame 57	0	0	0	0	0	0	2	0.25	0	0	0	0	0	0	0	0	0	0	0	0	0	0	0	0	0	0	0	0	0	0
6342	sterol carrier protein 2	678	89.32	319	37.54	525	62.27	2059	258.31	967	97.51	507	59.03	369	66.12	1147	120.07	971	130.3	648	84.12	592	83.13	489	102.15	658	73.77	707	83.39	1047	117.99
6643	sorting nexin 2	234	30.83	335	39.43	417	49.46	453	56.83	340	34.29	397	46.22	270	48.38	290	30.36	629	84.41	485	62.96	544	76.39	408	85.23	552	61.89	568	67	560	63.11
728975	hypothetical protein LOC728975	140	18.44	60	7.06	76	9.02	74	9.28	5	0.5	119	13.86	65	11.65	0	0	100	13.42	50	6.49	26	3.65	68	14.2	69	7.74	60	7.08	116	13.07
56475	reprimo, TP53 dependent G2 arrest mediator candidate	0	0	0	0	0	0	0	0	0	0	0	0	0	0	0	0	0	0	0	0	0	0	0	0	0	0	2	0.24	0	0
27232	glycine N-methyltransferase	12	1.58	45	5.3	36	4.27	4	0.5	17	1.71	32	3.73	19	3.4	24	2.51	9	1.21	10	1.3	14	1.97	4	0.84	32	3.59	27	3.18	15	1.69
10294	DnaJ (Hsp40) homolog, subfamily A, member 2	214	28.19	332	39.07	372	44.13	492	61.72	139	14.02	385	44.83	216	38.71	155	16.23	449	60.25	390	50.63	307	43.11	235	49.09	371	41.59	352	41.52	348	39.22
28960	decapping enzyme, scavenger	13	1.71	16	1.88	25	2.97	22	2.76	88	8.87	16	1.86	14	2.51	126	13.19	17	2.28	10	1.3	14	1.97	16	3.34	21	2.35	14	1.65	20	2.25
2729	glutamate-cysteine ligase, catalytic subunit	101	13.31	68	8	111	13.17	335	42.03	53	5.34	117	13.62	65	11.65	76	7.96	227	30.46	157	20.38	147	20.64	123	25.69	177	19.84	178	21	159	17.92
8878	sequestosome 1	260	34.25	574	67.55	602	71.41	331	41.53	4714	475.36	675	78.59	448	80.28	6041	632.4	735	98.63	564	73.22	672	94.37	549	114.68	869	97.43	1067	125.86	871	98.15
64763	zinc finger protein 574	29	3.82	52	6.12	44	5.22	121	15.18	48	4.84	28	3.26	18	3.23	75	7.85	99	13.29	48	6.23	64	8.99	42	8.77	66	7.4	68	8.02	44	4.96
9737	G protein-coupled receptor associated sorting protein 1	167	22	59	6.94	72	8.54	207	25.97	128	12.91	238	27.71	97	17.38	117	12.25	128	17.18	91	11.81	142	19.94	81	16.92	231	25.9	189	22.29	314	35.39
401913	hypothetical LOC401913	0	0	0	0	0	0	0	0	0	0	0	0	0	0	0	0	3	0.4	0	0	0	0	2	0.42	8	0.9	0	0	0	0
400236	hypothetical LOC400236	7	0.92	4	0.47	14	1.66	17	2.13	0	0	12	1.4	6	1.08	0	0	18	2.42	5	0.65	12	1.69	8	1.67	17	1.91	15	1.77	11	1.24
387700	solute carrier family 16, member 12 (monocarboxylic acid transporter 12)	148	19.5	13	1.53	7	0.83	71	8.91	0	0	17	1.98	3	0.54	0	0	18	2.42	17	2.21	8	1.12	32	6.68	5	0.56	12	1.42	42	4.73
57661	PHD and ring finger domains 1	45	5.93	65	7.65	58	6.88	61	7.65	154	15.53	67	7.8	53	9.5	133	13.92	107	14.36	72	9.35	98	13.76	92	19.22	95	10.65	115	13.56	72	8.11
81669	cyclin L2	593	78.12	1040	122.39	953	113.04	489	61.35	845	85.21	1226	142.74	856	153.39	1940	203.09	922	123.73	647	83.99	710	99.7	435	90.87	1599	179.27	1104	130.22	814	91.73
148808	major facilitator superfamily domain containing 4	8	1.05	4	0.47	2	0.24	2	0.25	11	1.11	5	0.58	0	0	0	0	5	0.67	7	0.91	2	0.28	2	0.42	2	0.22	7	0.83	12	1.35
114823	leukocyte receptor cluster (LRC) member 8	2575	339.22	1981	233.14	2380	282.31	6008	753.72	3474	350.32	2579	300.27	1301	233.13	5234	547.92	2351	315.5	1635	212.25	1963	275.66	1344	280.75	2896	324.68	2577	303.96	4123	464.63
29974	APOBEC1 complementation factor	37	4.87	55	6.47	55	6.52	46	5.77	0	0	66	7.68	43	7.71	0	0	19	2.55	11	1.43	7	0.98	15	3.13	52	5.83	20	2.36	27	3.04
1514	cathepsin L1	413	54.41	269	31.66	352	41.75	631	79.16	159	16.03	454	52.86	340	60.92	252	26.38	399	53.54	262	34.01	429	60.24	420	87.73	422	47.31	542	63.93	673	75.84
10019	SH2B adaptor protein 3	163	21.47	417	49.08	345	40.92	136	17.06	894	90.15	371	43.2	204	36.55	617	64.59	561	75.28	378	49.07	444	62.35	292	61	484	54.26	510	60.16	399	44.96
51571	family with sequence similarity 49, member B	493	64.95	3510	413.08	3317	393.46	767	96.22	0	0	3431	399.47	2057	368.59	0	0	2499	335.36	1983	257.43	2260	317.37	1491	311.46	3254	364.82	2741	323.31	2201	248.04
116844	leucine-rich alpha-2-glycoprotein 1	67	8.83	374	44.01	494	58.6	137	17.19	830	83.7	237	27.59	166	29.75	858	89.82	151	20.26	156	20.25	97	13.62	85	17.76	193	21.64	197	23.24	93	10.48
283143	hypothetical protein LOC283143	7	0.92	0	0	0	0	9	1.13	65	6.55	0	0	2	0.36	98	10.26	2	0.27	2	0.26	3	0.42	0	0	0	0	5	0.59	4	0.45
100132673	similar to mCG12811	6	0.79	2	0.24	4	0.47	2	0.25	0	0	4	0.47	3	0.54	0	0	5	0.67	4	0.52	7	0.98	3	0.63	3	0.34	5	0.59	6	0.68
199223	tetratricopeptide repeat domain 21A	13	1.71	21	2.47	18	2.14	36	4.52	38	3.83	13	1.51	8	1.43	106	11.1	17	2.28	13	1.69	14	1.97	22	4.6	14	1.57	34	4.01	22	2.48
9949	Alport syndrome, mental retardation, midface hypoplasia and elliptocytosis chromosomal region, gene 1	22	2.9	46	5.41	25	2.97	11	1.38	36	3.63	47	5.47	15	2.69	29	3.04	70	9.39	29	3.76	55	7.72	17	3.55	68	7.62	53	6.25	51	5.75
80173	intraflagellar transport 74 homolog (Chlamydomonas)	58	7.64	34	4	56	6.64	100	12.55	6	0.61	67	7.8	35	6.27	23	2.41	92	12.35	55	7.14	62	8.71	52	10.86	69	7.74	49	5.78	126	14.2
11235	programmed cell death 10	203	26.74	276	32.48	398	47.21	286	35.88	259	26.12	258	30.04	160	28.67	292	30.57	202	27.11	154	19.99	189	26.54	97	20.26	282	31.62	254	29.96	240	27.05
22917	zona pellucida glycoprotein 1 (sperm receptor)	0	0	2	0.24	2	0.24	5	0.63	0	0	0	0	0	0	0	0	2	0.27	0	0	0	0	0	0	0	0	0	0	0	0
100128692	hypothetical protein LOC100128692	2	0.26	0	0	0	0	7	0.88	11	1.11	0	0	0	0	4	0.42	0	0	0	0	0	0	0	0	5	0.56	0	0	5	0.56
129790	chromosome 7 open reading frame 13	4	0.53	4	0.47	5	0.59	11	1.38	0	0	0	0	2	0.36	0	0	2	0.27	10	1.3	7	0.98	0	0	6	0.67	2	0.24	7	0.79
284498	chromosome 1 open reading frame 167	0	0	0	0	0	0	0	0	0	0	0	0	0	0	0	0	0	0	0	0	0	0	0	0	8	0.9	0	0	0	0
729968	hypothetical protein LOC729968	106	13.96	6	0.71	11	1.3	15	1.88	14	1.41	5	0.58	3	0.54	12	1.26	4	0.54	14	1.82	7	0.98	19	3.97	6	0.67	9	1.06	18	2.03
10999	solute carrier family 27 (fatty acid transporter), member 4	13	1.71	7	0.82	16	1.9	24	3.01	20	2.02	18	2.1	14	2.51	26	2.72	19	2.55	13	1.69	15	2.11	18	3.76	10	1.12	16	1.89	8	0.9
25845	hypothetical LOC25845	2	0.26	0	0	0	0	0	0	0	0	0	0	0	0	0	0	0	0	0	0	0	0	0	0	0	0	3	0.35	0	0
9590	A kinase (PRKA) anchor protein 12	8	1.05	3	0.35	8	0.95	5	0.63	6	0.61	14	1.63	5	0.9	0	0	2	0.27	7	0.91	0	0	6	1.25	9	1.01	13	1.53	0	0
3141	holocarboxylase synthetase (biotin-(proprionyl-Coenzyme A-carboxylase (ATP-hydrolysing)) ligase)	17	2.24	10	1.18	26	3.08	25	3.14	23	2.32	12	1.4	7	1.25	36	3.77	54	7.25	30	3.89	29	4.07	20	4.18	47	5.27	29	3.42	58	6.54
51092	SID1 transmembrane family, member 2	91	11.99	98	11.53	106	12.57	122	15.31	209	21.08	109	12.69	51	9.14	238	24.91	154	20.67	81	10.52	116	16.29	86	17.96	143	16.03	106	12.5	153	17.24
92737	delta/notch-like EGF repeat containing	3	0.4	0	0	0	0	0	0	0	0	0	0	0	0	0	0	0	0	0	0	0	0	0	0	0	0	10	1.18	0	0
100130357	similar to hCG2038897	45	5.93	61	7.18	109	12.93	132	16.56	16	1.61	37	4.31	24	4.3	35	3.66	20	2.68	18	2.34	26	3.65	16	3.34	8	0.9	22	2.59	58	6.54
727893	similar to phosphodiesterase 4D interacting protein (myomegalin)	0	0	0	0	0	0	0	0	0	0	0	0	0	0	8	0.84	0	0	0	0	0	0	0	0	0	0	0	0	0	0
100130076	hypothetical protein LOC100130076	0	0	0	0	0	0	0	0	0	0	0	0	0	0	0	0	0	0	0	0	0	0	2	0.42	0	0	0	0	0	0
51768	transmembrane 7 superfamily member 3	36	4.74	56	6.59	74	8.78	67	8.41	306	30.86	62	7.22	41	7.35	364	38.11	105	14.09	79	10.26	75	10.53	45	9.4	60	6.73	57	6.72	112	12.62
375298	ceramide kinase-like	33	4.35	7	0.82	10	1.19	69	8.66	0	0	25	2.91	9	1.61	12	1.26	25	3.35	7	0.91	19	2.67	8	1.67	13	1.46	22	2.59	71	8
3240	haptoglobin	9	1.19	48	5.65	45	5.34	22	2.76	50	5.04	42	4.89	38	6.81	6	0.63	18	2.42	27	3.51	30	4.21	19	3.97	32	3.59	26	3.07	17	1.92
1910	endothelin receptor type B	0	0	0	0	0	0	2	0.25	0	0	0	0	0	0	3	0.31	0	0	0	0	0	0	0	0	0	0	0	0	0	0
7695	zinc finger protein 136	176	23.19	232	27.3	181	21.47	203	25.47	5	0.5	255	29.69	119	21.32	2	0.21	151	20.26	108	14.02	136	19.1	101	21.1	220	24.67	188	22.18	216	24.34
3574	interleukin 7	13	1.71	5	0.59	5	0.59	25	3.14	3	0.3	6	0.7	2	0.36	2	0.21	13	1.74	11	1.43	21	2.95	6	1.25	11	1.23	9	1.06	0	0
26270	F-box protein 6	52	6.85	53	6.24	102	12.1	107	13.42	39	3.93	56	6.52	73	13.08	12	1.26	130	17.45	77	10	115	16.15	160	33.42	83	9.31	66	7.78	105	11.83
124801	LSM12 homolog (S. cerevisiae)	22	2.9	59	6.94	53	6.29	19	2.38	178	17.95	73	8.5	53	9.5	293	30.67	98	13.15	63	8.18	56	7.86	50	10.44	86	9.64	92	10.85	62	6.99
100132664	hypothetical protein LOC100132664	36	4.74	2	0.24	0	0	5	0.63	0	0	10	1.16	0	0	0	0	5	0.67	9	1.17	2	0.28	12	2.51	3	0.34	3	0.35	26	2.93
84106	PML-RARA regulated adaptor molecule 1	170	22.4	219	25.77	437	51.84	981	123.07	1333	134.42	220	25.61	110	19.71	1545	161.74	133	17.85	82	10.65	154	21.63	99	20.68	136	15.25	166	19.58	202	22.76
5145	phosphodiesterase 6A, cGMP-specific, rod, alpha	102	13.44	7	0.82	17	2.02	40	5.02	29	2.92	14	1.63	8	1.43	44	4.61	21	2.82	15	1.95	7	0.98	22	4.6	14	1.57	18	2.12	25	2.82
8604	solute carrier family 25 (mitochondrial carrier, Aralar), member 12	32	4.22	44	5.18	45	5.34	105	13.17	25	2.52	35	4.08	25	4.48	50	5.23	44	5.9	40	5.19	53	7.44	27	5.64	46	5.16	47	5.54	87	9.8
3672	integrin, alpha 1	11	1.45	10	1.18	18	2.14	6	0.75	0	0	8	0.93	23	4.12	0	0	36	4.83	17	2.21	30	4.21	11	2.3	23	2.58	22	2.59	24	2.7
6939	transcription factor 15 (basic helix-loop-helix)	0	0	0	0	0	0	0	0	0	0	0	0	0	0	5	0.52	0	0	0	0	0	0	0	0	0	0	0	0	0	0
53981	cleavage and polyadenylation specific factor 2, 100kDa	114	15.02	58	6.83	60	7.12	87	10.91	146	14.72	87	10.13	49	8.78	216	22.61	113	15.16	92	11.94	122	17.13	120	25.07	68	7.62	70	8.26	109	12.28
56898	3-hydroxybutyrate dehydrogenase, type 2	91	11.99	28	3.3	34	4.03	84	10.54	42	4.24	58	6.75	21	3.76	78	8.17	104	13.96	69	8.96	58	8.14	47	9.82	44	4.93	92	10.85	128	14.42
27285	tektin 2 (testicular)	0	0	2	0.24	0	0	0	0	7	0.71	0	0	0	0	0	0	5	0.67	2	0.26	8	1.12	0	0	7	0.78	4	0.47	16	1.8
166929	sphingomyelin synthase 2	3	0.4	4	0.47	2	0.24	0	0	0	0	0	0	5	0.9	0	0	6	0.81	7	0.91	2	0.28	3	0.63	7	0.78	0	0	3	0.34
158506	zinc finger protein 645	0	0	0	0	0	0	0	0	0	0	0	0	0	0	0	0	0	0	2	0.26	0	0	0	0	0	0	0	0	0	0
83590	transmembrane and ubiquitin-like domain containing 1	53	6.98	39	4.59	45	5.34	144	18.07	132	13.31	54	6.29	32	5.73	149	15.6	60	8.05	41	5.32	50	7.02	47	9.82	50	5.61	56	6.61	57	6.42
51809	UDP-N-acetyl-alpha-D-galactosamine:polypeptide N-acetylgalactosaminyltransferase 7 (GalNAc-T7)	294	38.73	463	54.49	729	86.47	957	120.06	251	25.31	473	55.07	431	77.23	278	29.1	569	76.36	440	57.12	587	82.43	366	76.45	367	41.15	441	52.02	518	58.37
100134699	hypothetical protein LOC100134699	32	4.22	3	0.35	2	0.24	23	2.89	0	0	9	1.05	2	0.36	0	0	7	0.94	2	0.26	0	0	0	0	0	0	10	1.18	9	1.01
56181	family with sequence similarity 54, member B	87	11.46	132	15.53	161	19.1	105	13.17	197	19.87	194	22.59	153	27.42	171	17.9	257	34.49	203	26.35	165	23.17	129	26.95	190	21.3	187	22.06	197	22.2
55911	apolipoprotein B48 receptor	534	70.35	1281	150.76	2008	238.19	1444	181.15	4963	500.47	1803	209.92	1312	235.1	3918	410.15	890	119.43	433	56.21	1068	149.98	681	142.26	1195	133.98	1667	196.63	1175	132.41
26278	spastic ataxia of Charlevoix-Saguenay (sacsin)	136	17.92	63	7.41	88	10.44	356	44.66	81	8.17	102	11.88	41	7.35	142	14.87	132	17.71	81	10.52	70	9.83	52	10.86	104	11.66	80	9.44	193	21.75
144983	heterogeneous nuclear ribonucleoprotein A1-like	2	0.26	0	0	0	0	2	0.25	11	1.11	0	0	0	0	4	0.42	7	0.94	4	0.52	12	1.69	5	1.04	0	0	6	0.71	0	0
100132493	similar to nucleophosmin-retinoic acid receptor alpha fusion protein NPM-RAR long form	0	0	0	0	0	0	0	0	9	0.91	0	0	0	0	17	1.78	0	0	0	0	0	0	0	0	0	0	0	0	0	0
84263	hydroxysteroid dehydrogenase like 2	182	23.98	407	47.9	552	65.48	371	46.54	410	41.34	506	58.91	345	61.82	237	24.81	380	50.99	306	39.72	415	58.28	256	53.48	469	52.58	505	59.57	450	50.71
11339	Opa interacting protein 5	3	0.4	0	0	2	0.24	17	2.13	22	2.22	0	0	0	0	20	2.09	0	0	0	0	0	0	0	0	0	0	0	0	0	0
83694	ribosomal protein S6 kinase-like 1	0	0	0	0	0	0	0	0	5	0.5	0	0	0	0	4	0.42	0	0	0	0	0	0	0	0	0	0	0	0	4	0.45
100124692	maltase-glucoamylase-like pseudogene	0	0	2	0.24	0	0	0	0	0	0	0	0	0	0	0	0	0	0	0	0	0	0	0	0	0	0	0	0	0	0
112616	CKLF-like MARVEL transmembrane domain containing 7	318	41.89	485	57.08	523	62.04	358	44.91	356	35.9	774	90.12	330	59.13	706	73.91	407	54.62	269	34.92	338	47.46	264	55.15	601	67.38	402	47.42	529	59.61
729870	hypothetical LOC729870	0	0	12	1.41	6	0.71	0	0	0	0	2	0.23	0	0	0	0	0	0	0	0	0	0	0	0	4	0.45	6	0.71	0	0
4072	tumor-associated calcium signal transducer 1	5	0.66	0	0	2	0.24	0	0	0	0	0	0	0	0	0	0	0	0	0	0	0	0	0	0	0	0	0	0	0	0
6710	spectrin, beta, erythrocytic	4	0.53	23	2.71	6	0.71	5	0.63	0	0	23	2.68	5	0.9	3	0.31	16	2.15	53	6.88	12	1.69	8	1.67	39	4.37	47	5.54	7	0.79
140850	defensin, beta 127	0	0	0	0	0	0	0	0	0	0	0	0	0	0	0	0	0	0	0	0	0	0	0	0	0	0	4	0.47	5	0.56
728693	hypothetical LOC728693	1600	210.78	24	2.82	15	1.78	246	30.86	0	0	45	5.24	5	0.9	0	0	65	8.72	89	11.55	19	2.67	137	28.62	5	0.56	89	10.5	336	37.86
127544	ring finger protein 19B	273	35.96	760	89.44	745	88.37	363	45.54	398	40.13	775	90.23	525	94.07	230	24.08	601	80.65	571	74.13	622	87.35	402	83.97	763	85.54	671	79.15	633	71.33
7155	topoisomerase (DNA) II beta 180kDa	452	59.54	499	58.73	530	62.87	1416	177.64	805	81.18	755	87.9	411	73.65	646	67.63	773	103.73	464	60.24	644	90.44	317	66.22	706	79.15	705	83.16	686	77.31
729370	hypothetical LOC729370	24	3.16	8	0.94	2	0.24	18	2.26	0	0	2	0.23	0	0	0	0	0	0	6	0.78	4	0.56	0	0	0	0	3	0.35	0	0
55063	zinc finger, CW type with PWWP domain 1	25	3.29	44	5.18	67	7.95	98	12.29	36	3.63	57	6.64	32	5.73	52	5.44	51	6.84	26	3.38	45	6.32	17	3.55	25	2.8	63	7.43	40	4.51
727722	homogentisate 1,2-dioxygenase like	0	0	0	0	0	0	0	0	0	0	0	0	0	0	0	0	2	0.27	0	0	0	0	0	0	0	0	0	0	0	0
1136	cholinergic receptor, nicotinic, alpha 3	0	0	0	0	0	0	0	0	0	0	0	0	0	0	0	0	0	0	2	0.26	0	0	0	0	0	0	0	0	0	0
5296	phosphoinositide-3-kinase, regulatory subunit 2 (beta)	25	3.29	31	3.65	28	3.32	13	1.63	95	9.58	56	6.52	34	6.09	95	9.95	36	4.83	39	5.06	49	6.88	30	6.27	60	6.73	31	3.66	34	3.83
23325	KIAA1033	175	23.05	501	58.96	477	56.58	104	13.05	309	31.16	462	53.79	293	52.5	258	27.01	455	61.06	482	62.57	411	57.72	357	74.57	521	58.41	415	48.95	416	46.88
2551	GA binding protein transcription factor, alpha subunit 60kDa	234	30.83	214	25.18	302	35.82	336	42.15	99	9.98	217	25.27	162	29.03	163	17.06	342	45.9	233	30.25	276	38.76	166	34.68	260	29.15	350	41.28	360	40.57
790	carbamoyl-phosphate synthetase 2, aspartate transcarbamylase, and dihydroorotase	39	5.14	49	5.77	53	6.29	187	23.46	37	3.73	42	4.89	23	4.12	84	8.79	67	8.99	46	5.97	46	6.46	31	6.48	52	5.83	73	8.61	89	10.03
100033432	small nucleolar RNA, C/D box 116-21	0	0	0	0	0	0	0	0	0	0	0	0	0	0	8	0.84	0	0	0	0	0	0	0	0	0	0	0	0	0	0
6241	ribonucleotide reductase M2 polypeptide	62	8.17	56	6.59	55	6.52	96	12.04	22	2.22	24	2.79	12	2.15	6	0.63	25	3.35	29	3.76	19	2.67	13	2.72	53	5.94	55	6.49	77	8.68
147183	keratin 25	0	0	0	0	0	0	4	0.5	0	0	0	0	0	0	0	0	0	0	0	0	0	0	0	0	0	0	0	0	0	0
201163	folliculin	80	10.54	219	25.77	243	28.82	80	10.04	11	1.11	159	18.51	110	19.71	6	0.63	123	16.51	115	14.93	138	19.38	45	9.4	180	20.18	147	17.34	86	9.69
5608	mitogen-activated protein kinase kinase 6	27	3.56	77	9.06	106	12.57	169	21.2	0	0	76	8.85	62	11.11	0	0	52	6.98	47	6.1	62	8.71	52	10.86	88	9.87	73	8.61	57	6.42
120534	chromosome 11 open reading frame 46	25	3.29	17	2	22	2.61	25	3.14	31	3.13	37	4.31	18	3.23	41	4.29	36	4.83	42	5.45	29	4.07	47	9.82	39	4.37	32	3.77	23	2.59
10490	vesicle transport through interaction with t-SNAREs homolog 1B (yeast)	158	20.81	237	27.89	292	34.64	302	37.89	79	7.97	359	41.8	154	27.6	58	6.07	490	65.76	383	49.72	351	49.29	237	49.51	370	41.48	497	58.62	360	40.57
23543	RNA binding motif protein 9	2	0.26	2	0.24	0	0	2	0.25	3	0.3	2	0.23	0	0	4	0.42	5	0.67	5	0.65	3	0.42	0	0	0	0	0	0	0	0
100133486	similar to hCG2043448	0	0	0	0	2	0.24	4	0.5	4	0.4	0	0	0	0	0	0	0	0	0	0	0	0	0	0	0	0	0	0	0	0
6182	mitochondrial ribosomal protein L12	54	7.11	31	3.65	44	5.22	82	10.29	100	10.08	52	6.05	14	2.51	118	12.35	42	5.64	25	3.25	35	4.91	42	8.77	56	6.28	62	7.31	78	8.79
9404	leupaxin	237	31.22	329	38.72	358	42.47	604	75.77	259	26.12	435	50.65	269	48.2	778	81.44	702	94.21	527	68.41	538	75.55	354	73.95	407	45.63	556	65.58	517	58.26
56159	testis expressed 11	17	2.24	0	0	0	0	2	0.25	0	0	0	0	0	0	0	0	0	0	3	0.39	2	0.28	0	0	0	0	0	0	5	0.56
8834	transmembrane protein 11	240	31.62	308	36.25	425	50.41	347	43.53	1059	106.79	329	38.31	167	29.92	1443	151.06	95	12.75	102	13.24	151	21.2	79	16.5	216	24.22	229	27.01	249	28.06
79812	multimerin 2	10	1.32	0	0	0	0	0	0	9	0.91	2	0.23	0	0	49	5.13	0	0	3	0.39	0	0	0	0	0	0	0	0	14	1.58
731789	similar to amyloid beta (A4) precursor protein-binding, family B, member 1 interacting protein	2	0.26	30	3.53	20	2.37	13	1.63	0	0	25	2.91	9	1.61	0	0	19	2.55	6	0.78	35	4.91	19	3.97	46	5.16	15	1.77	9	1.01
29106	secretogranin III	41	5.4	19	2.24	3	0.36	12	1.51	0	0	28	3.26	8	1.43	0	0	36	4.83	38	4.93	24	3.37	42	8.77	36	4.04	36	4.25	49	5.52
79682	MLF1 interacting protein	16	2.11	11	1.29	9	1.07	14	1.76	0	0	27	3.14	4	0.72	2	0.21	20	2.68	15	1.95	8	1.12	11	2.3	20	2.24	5	0.59	7	0.79
23304	ubiquitin protein ligase E3 component n-recognin 2	243	32.01	525	61.79	612	72.59	324	40.65	321	32.37	525	61.13	347	62.18	195	20.41	424	56.9	343	44.53	480	67.41	268	55.98	619	69.4	642	75.73	484	54.54
7453	tryptophanyl-tRNA synthetase	119	15.68	378	44.49	345	40.92	172	21.58	562	56.67	732	85.23	519	93	515	53.91	365	48.98	357	46.35	399	56.03	472	98.6	816	91.49	630	74.31	466	52.51
92715	WD repeat domain 85	42	5.53	61	7.18	63	7.47	197	24.71	106	10.69	50	5.82	40	7.17	140	14.66	111	14.9	97	12.59	97	13.62	68	14.2	92	10.31	107	12.62	93	10.48
119710	chromosome 11 open reading frame 74	0	0	5	0.59	0	0	0	0	14	1.41	3	0.35	0	0	17	1.78	4	0.54	0	0	10	1.4	0	0	8	0.9	3	0.35	3	0.34
646875	similar to ribosomal protein L12	0	0	0	0	0	0	0	0	3	0.3	0	0	0	0	0	0	0	0	0	0	0	0	0	0	0	0	0	0	0	0
10916	melanoma antigen family D, 2	148	19.5	127	14.95	128	15.18	251	31.49	75	7.56	185	21.54	75	13.44	69	7.22	223	29.93	136	17.66	143	20.08	106	22.14	213	23.88	239	28.19	221	24.9
79025	chromosome 20 open reading frame 195	6	0.79	0	0	5	0.59	0	0	28	2.82	0	0	4	0.72	11	1.15	4	0.54	4	0.52	4	0.56	0	0	9	1.01	11	1.3	15	1.69
56155	testis expressed 14	4	0.53	0	0	0	0	0	0	0	0	0	0	0	0	3	0.31	3	0.4	0	0	2	0.28	0	0	0	0	4	0.47	2	0.23
6579	solute carrier organic anion transporter family, member 1A2	464	61.13	70	8.24	25	2.97	69	8.66	0	0	51	5.94	12	2.15	0	0	56	7.51	53	6.88	26	3.65	80	16.71	40	4.48	61	7.2	73	8.23
5780	protein tyrosine phosphatase, non-receptor type 9	11	1.45	15	1.77	8	0.95	14	1.76	49	4.94	30	3.49	9	1.61	34	3.56	47	6.31	23	2.99	57	8	24	5.01	34	3.81	49	5.78	16	1.8
10059	dynamin 1-like	122	16.07	113	13.3	134	15.89	108	13.55	429	43.26	160	18.63	83	14.87	752	78.72	295	39.59	163	21.16	173	24.29	162	33.84	195	21.86	248	29.25	291	32.79
387338	NOL1/NOP2/Sun domain family, member 4	174	22.92	107	12.59	116	13.76	99	12.42	51	5.14	106	12.34	50	8.96	83	8.69	112	15.03	76	9.87	86	12.08	89	18.59	104	11.66	126	14.86	161	18.14
126520	hypothetical protein LOC126520	0	0	0	0	0	0	0	0	0	0	0	0	0	0	3	0.31	2	0.27	0	0	0	0	0	0	0	0	0	0	0	0
201294	unc-13 homolog D (C. elegans)	190	25.03	418	49.19	748	88.73	516	64.73	413	41.65	444	51.7	444	79.56	374	39.15	622	83.47	371	48.16	749	105.18	419	87.53	467	52.36	804	94.83	435	49.02
83481	epiplakin 1	0	0	0	0	0	0	0	0	0	0	0	0	0	0	0	0	0	0	5	0.65	0	0	0	0	3	0.34	3	0.35	0	0
56981	PR domain containing 11	0	0	0	0	0	0	0	0	0	0	0	0	0	0	0	0	0	0	0	0	0	0	0	0	0	0	0	0	9	1.01
27185	disrupted in schizophrenia 1	85	11.2	139	16.36	146	17.32	232	29.11	23	2.32	161	18.75	100	17.92	43	4.5	88	11.81	81	10.52	65	9.13	71	14.83	122	13.68	112	13.21	103	11.61
149650	hypothetical protein FLJ32154	0	0	0	0	0	0	0	0	0	0	0	0	0	0	0	0	0	0	0	0	0	0	0	0	3	0.34	0	0	0	0
80817	KIAA1712	28	3.69	59	6.94	71	8.42	20	2.51	142	14.32	101	11.76	63	11.29	99	10.36	82	11	79	10.26	63	8.85	61	12.74	98	10.99	50	5.9	65	7.32
26531	olfactory receptor, family 11, subfamily A, member 1	92	12.12	18	2.12	6	0.71	39	4.89	0	0	29	3.38	0	0	0	0	41	5.5	43	5.58	15	2.11	40	8.36	19	2.13	34	4.01	24	2.7
57786	RB-associated KRAB zinc finger	36	4.74	41	4.83	55	6.52	31	3.89	107	10.79	80	9.31	45	8.06	68	7.12	130	17.45	71	9.22	80	11.23	59	12.32	93	10.43	102	12.03	105	11.83
56852	RAD18 homolog (S. cerevisiae)	5	0.66	6	0.71	11	1.3	19	2.38	8	0.81	12	1.4	6	1.08	7	0.73	15	2.01	10	1.3	0	0	9	1.88	22	2.47	3	0.35	0	0
4689	neutrophil cytosolic factor 4, 40kDa	703	92.61	3430	403.67	4010	475.66	1775	222.68	4639	467.8	2500	291.08	2240	401.39	3451	361.27	1365	183.18	1527	198.23	2276	319.61	1355	283.05	1503	168.51	1754	206.89	1374	154.84
349136	WD repeat domain 86	0	0	0	0	0	0	0	0	0	0	0	0	0	0	2	0.21	0	0	0	0	0	0	0	0	4	0.45	0	0	0	0
1056	carboxyl ester lipase (bile salt-stimulated lipase)	6	0.79	11	1.29	5	0.59	5	0.63	0	0	7	0.82	2	0.36	0	0	8	1.07	4	0.52	5	0.7	5	1.04	7	0.78	6	0.71	17	1.92
646424	serine peptidase inhibitor, Kazal type 8 (putative)	23	3.03	10	1.18	40	4.74	28	3.51	149	15.03	60	6.99	51	9.14	126	13.19	9	1.21	9	1.17	12	1.69	8	1.67	16	1.79	4	0.47	27	3.04
9724	UTP14, U3 small nucleolar ribonucleoprotein, homolog C (yeast)	48	6.32	42	4.94	50	5.93	45	5.65	53	5.34	55	6.4	49	8.78	58	6.07	62	8.32	34	4.41	31	4.35	29	6.06	50	5.61	63	7.43	71	8
645733	similar to hCG1812929	0	0	0	0	2	0.24	0	0	9	0.91	0	0	0	0	2	0.21	0	0	0	0	0	0	0	0	0	0	6	0.71	0	0
90865	interleukin 33	2	0.26	0	0	0	0	0	0	0	0	0	0	0	0	0	0	0	0	0	0	0	0	0	0	0	0	0	0	0	0
8786	regulator of G-protein signaling 11	0	0	0	0	0	0	3	0.38	0	0	0	0	0	0	0	0	0	0	0	0	0	0	0	0	0	0	2	0.24	0	0
5029	purinergic receptor P2Y, G-protein coupled, 2	8	1.05	18	2.12	17	2.02	40	5.02	41	4.13	31	3.61	21	3.76	24	2.51	21	2.82	16	2.08	28	3.93	28	5.85	20	2.24	21	2.48	18	2.03
28982	feline leukemia virus subgroup C cellular receptor 1	0	0	2	0.24	9	1.07	0	0	181	18.25	23	2.68	17	3.05	96	10.05	19	2.55	12	1.56	15	2.11	9	1.88	25	2.8	15	1.77	18	2.03
214	activated leukocyte cell adhesion molecule	87	11.46	135	15.89	138	16.37	57	7.15	35	3.53	83	9.66	78	13.98	50	5.23	140	18.79	103	13.37	127	17.83	74	15.46	114	12.78	129	15.22	83	9.35
8189	symplekin	143	18.84	125	14.71	147	17.44	366	45.92	27	2.72	202	23.52	107	19.17	76	7.96	258	34.62	83	10.77	211	29.63	188	39.27	160	17.94	235	27.72	285	32.12
80759	KH homology domain containing 1	0	0	0	0	0	0	0	0	0	0	0	0	0	0	0	0	0	0	0	0	2	0.28	0	0	0	0	0	0	4	0.45
149708	WAP four-disulfide core domain 5	0	0	0	0	0	0	0	0	5	0.5	0	0	0	0	0	0	0	0	0	0	0	0	0	0	0	0	0	0	0	0
340286	family with sequence similarity 183, member B	0	0	0	0	0	0	4	0.5	8	0.81	3	0.35	0	0	5	0.52	0	0	2	0.26	0	0	0	0	0	0	0	0	0	0
440311	similar to P60	2	0.26	0	0	0	0	0	0	0	0	0	0	0	0	0	0	0	0	0	0	0	0	0	0	0	0	0	0	0	0
10531	pitrilysin metallopeptidase 1	147	19.37	135	15.89	127	15.06	127	15.93	281	28.34	211	24.57	101	18.1	396	41.46	276	37.04	230	29.86	229	32.16	137	28.62	363	40.7	248	29.25	309	34.82
79603	LAG1 homolog, ceramide synthase 4	85	11.2	81	9.53	196	23.25	268	33.62	58	5.85	123	14.32	89	15.95	202	21.15	140	18.79	129	16.75	140	19.66	69	14.41	133	14.91	133	15.69	115	12.96
56265	carboxypeptidase X (M14 family), member 1	2	0.26	0	0	0	0	3	0.38	13	1.31	2	0.23	0	0	0	0	0	0	0	0	0	0	0	0	0	0	0	0	7	0.79
440389	similar to hCG2045623	3	0.4	0	0	0	0	2	0.25	0	0	0	0	0	0	0	0	0	0	0	0	2	0.28	4	0.84	0	0	0	0	0	0
9843	hephaestin	0	0	0	0	0	0	0	0	0	0	0	0	0	0	0	0	0	0	0	0	0	0	0	0	0	0	0	0	2	0.23
27247	NFU1 iron-sulfur cluster scaffold homolog (S. cerevisiae)	54	7.11	58	6.83	59	7	22	2.76	147	14.82	68	7.92	37	6.63	139	14.55	128	17.18	51	6.62	60	8.43	55	11.49	65	7.29	85	10.03	67	7.55
100133885	hypothetical protein LOC100133885	0	0	0	0	0	0	0	0	0	0	0	0	0	0	0	0	0	0	0	0	0	0	0	0	0	0	0	0	3	0.34
79081	chromosome 11 open reading frame 48	74	9.75	24	2.82	53	6.29	294	36.88	90	9.08	27	3.14	20	3.58	105	10.99	45	6.04	28	3.63	30	4.21	21	4.39	41	4.6	43	5.07	71	8
5128	PCTAIRE protein kinase 2	17	2.24	48	5.65	37	4.39	22	2.76	92	9.28	48	5.59	41	7.35	127	13.29	134	17.98	95	12.33	51	7.16	72	15.04	70	7.85	90	10.62	42	4.73
83889	WD repeat domain 87	6	0.79	0	0	0	0	9	1.13	0	0	0	0	0	0	0	0	0	0	0	0	0	0	0	0	0	0	0	0	0	0
952	CD38 molecule	10	1.32	21	2.47	26	3.08	9	1.13	53	5.34	6	0.7	5	0.9	58	6.07	36	4.83	23	2.99	7	0.98	19	3.97	19	2.13	28	3.3	44	4.96
9543	putative neuronal cell adhesion molecule	0	0	0	0	0	0	0	0	0	0	0	0	0	0	0	0	0	0	2	0.26	0	0	0	0	0	0	0	0	0	0
347918	EP400 N-terminal like	6	0.79	11	1.29	9	1.07	0	0	22	2.22	24	2.79	5	0.9	42	4.4	13	1.74	5	0.65	12	1.69	6	1.25	16	1.79	18	2.12	19	2.14
9131	apoptosis-inducing factor, mitochondrion-associated, 1	34	4.48	39	4.59	51	6.05	80	10.04	95	9.58	52	6.05	24	4.3	125	13.09	111	14.9	92	11.94	62	8.71	57	11.91	59	6.61	115	13.56	99	11.16
6708	spectrin, alpha, erythrocytic 1 (elliptocytosis 2)	0	0	2	0.24	4	0.47	3	0.38	0	0	0	0	2	0.36	0	0	4	0.54	0	0	2	0.28	0	0	6	0.67	3	0.35	0	0
3375	islet amyloid polypeptide	2	0.26	0	0	0	0	0	0	0	0	0	0	0	0	0	0	0	0	0	0	0	0	0	0	0	0	0	0	0	0
27292	DIM1 dimethyladenosine transferase 1-like (S. cerevisiae)	136	17.92	114	13.42	94	11.15	187	23.46	11	1.11	190	22.12	84	15.05	45	4.71	151	20.26	106	13.76	138	19.38	107	22.35	171	19.17	165	19.46	194	21.86
9711	KIAA0226	93	12.25	117	13.77	107	12.69	159	19.95	171	17.24	180	20.96	65	11.65	153	16.02	200	26.84	123	15.97	133	18.68	124	25.9	146	16.37	151	17.81	157	17.69
731642	similar to ribosomal protein L18a	2	0.26	0	0	0	0	0	0	0	0	0	0	0	0	0	0	0	0	0	0	0	0	0	0	0	0	0	0	0	0
5863	ral guanine nucleotide dissociation stimulator-like 2	645	84.97	2157	253.85	2297	272.47	714	89.57	2044	206.12	1769	205.97	1561	279.72	1246	130.44	1367	183.45	1083	140.59	1630	228.9	997	208.26	1629	182.63	1759	207.48	1381	155.63
9568	gamma-aminobutyric acid (GABA) B receptor, 2	0	0	0	0	0	0	0	0	2	0.2	0	0	0	0	3	0.31	3	0.4	0	0	0	0	0	0	0	0	0	0	0	0
57050	UTP3, small subunit (SSU) processome component, homolog (S. cerevisiae)	49	6.46	32	3.77	50	5.93	80	10.04	554	55.87	53	6.17	34	6.09	593	62.08	79	10.6	57	7.4	52	7.3	38	7.94	96	10.76	78	9.2	83	9.35
23362	pleckstrin and Sec7 domain containing 3	11	1.45	19	2.24	18	2.14	9	1.13	0	0	15	1.75	15	2.69	6	0.63	43	5.77	35	4.54	37	5.2	24	5.01	18	2.02	36	4.25	26	2.93
168474	selenophosphate synthetase pseudogene	3	0.4	0	0	0	0	0	0	31	3.13	0	0	0	0	12	1.26	0	0	0	0	0	0	0	0	0	0	0	0	0	0
7424	vascular endothelial growth factor C	2	0.26	0	0	0	0	11	1.38	18	1.82	2	0.23	0	0	2	0.21	10	1.34	0	0	2	0.28	0	0	13	1.46	5	0.59	0	0
537	ATPase, H+ transporting, lysosomal accessory protein 1	171	22.53	433	50.96	511	60.61	312	39.14	120	12.1	519	60.43	411	73.65	151	15.81	584	78.37	508	65.95	503	70.64	371	77.5	587	65.81	517	60.98	405	45.64
26508	hairy/enhancer-of-split related with YRPW motif-like	0	0	0	0	0	0	0	0	0	0	0	0	0	0	9	0.94	4	0.54	0	0	0	0	0	0	0	0	0	0	0	0
9702	centrosomal protein 57kDa	84	11.07	122	14.36	142	16.84	74	9.28	153	15.43	230	26.78	132	23.65	143	14.97	273	36.64	131	17.01	136	19.1	123	25.69	287	32.18	158	18.64	127	14.31
7538	zinc finger protein 36, C3H type, homolog (mouse)	5157	679.37	9500	1118.02	12489	1481.43	10727	1345.74	4931	497.25	7556	879.75	6245	1119.04	2553	267.26	6115	820.61	5171	671.29	5393	757.33	6003	1253.98	8399	941.65	10847	1279.44	7590	855.33
2859	G protein-coupled receptor 35	16	2.11	12	1.41	21	2.49	46	5.77	39	3.93	19	2.21	13	2.33	18	1.88	12	1.61	5	0.65	12	1.69	12	2.51	14	1.57	31	3.66	21	2.37
57124	CD248 molecule, endosialin	0	0	0	0	0	0	8	1	0	0	0	0	0	0	0	0	0	0	0	0	0	0	2	0.42	6	0.67	12	1.42	22	2.48
8438	RAD54-like (S. cerevisiae)	6	0.79	0	0	7	0.83	6	0.75	0	0	3	0.35	0	0	0	0	0	0	0	0	0	0	4	0.84	2	0.22	6	0.71	4	0.45
286128	zinc finger protein 41 homolog (mouse)	2	0.26	2	0.24	2	0.24	4	0.5	0	0	5	0.58	0	0	6	0.63	2	0.27	2	0.26	4	0.56	4	0.84	4	0.45	3	0.35	4	0.45
127829	ADP-ribosylation factor-like 8A	295	38.86	716	84.26	555	65.83	241	30.23	310	31.26	685	79.75	425	76.16	339	35.49	508	68.17	399	51.8	444	62.35	357	74.57	519	58.19	480	56.62	354	39.89
4653	myocilin, trabecular meshwork inducible glucocorticoid response	0	0	0	0	0	0	0	0	0	0	0	0	0	0	0	0	0	0	3	0.39	0	0	0	0	0	0	0	0	0	0
58527	chromosome 6 open reading frame 115	166	21.87	150	17.65	153	18.15	274	34.37	176	17.75	334	38.89	122	21.86	249	26.07	195	26.17	120	15.58	152	21.35	107	22.35	415	46.53	230	27.13	284	32
4236	microfibrillar-associated protein 1	105	13.83	139	16.36	148	17.56	92	11.54	190	19.16	116	13.51	97	17.38	247	25.86	129	17.31	118	15.32	75	10.53	85	17.76	166	18.61	109	12.86	110	12.4
6504	signaling lymphocytic activation molecule family member 1	29	3.82	17	2	22	2.61	21	2.63	83	8.37	26	3.03	8	1.43	25	2.62	45	6.04	29	3.76	40	5.62	16	3.34	52	5.83	25	2.95	33	3.72
56957	OTU domain containing 7B	11	1.45	7	0.82	5	0.59	17	2.13	15	1.51	4	0.47	8	1.43	59	6.18	15	2.01	7	0.91	10	1.4	5	1.04	12	1.35	10	1.18	33	3.72
1399	v-crk sarcoma virus CT10 oncogene homolog (avian)-like	162	21.34	369	43.43	352	41.75	151	18.94	363	36.61	341	39.7	190	34.05	554	58	462	62	316	41.02	340	47.75	202	42.2	346	38.79	345	40.69	291	32.79
11101	arginyltransferase 1	3	0.4	0	0	4	0.47	0	0	2	0.2	4	0.47	2	0.36	14	1.47	16	2.15	5	0.65	11	1.54	5	1.04	12	1.35	19	2.24	5	0.56
79823	chromosome 2 open reading frame 34	12	1.58	9	1.06	20	2.37	6	0.75	11	1.11	18	2.1	2	0.36	12	1.26	15	2.01	4	0.52	4	0.56	5	1.04	5	0.56	18	2.12	32	3.61
284370	zinc finger protein 615	29	3.82	20	2.35	32	3.8	18	2.26	36	3.63	34	3.96	28	5.02	11	1.15	50	6.71	49	6.36	31	4.35	28	5.85	31	3.48	20	2.36	49	5.52
51330	tumor necrosis factor receptor superfamily, member 12A	9	1.19	15	1.77	27	3.2	35	4.39	43	4.34	16	1.86	9	1.61	38	3.98	2	0.27	4	0.52	4	0.56	5	1.04	5	0.56	11	1.3	10	1.13
27089	ubiquinol-cytochrome c reductase, complex III subunit VII, 9.5kDa	312	41.1	377	44.37	420	49.82	114	14.3	1038	104.67	475	55.3	364	65.23	1658	173.57	452	60.66	404	52.45	353	49.57	328	68.52	686	76.91	492	58.03	506	57.02
55108	BSD domain containing 1	60	7.9	144	16.95	114	13.52	97	12.17	191	19.26	158	18.4	98	17.56	218	22.82	207	27.78	141	18.3	190	26.68	110	22.98	144	16.14	159	18.75	173	19.5
115752	DIS3 mitotic control homolog (S. cerevisiae)-like	11	1.45	19	2.24	25	2.97	15	1.88	0	0	31	3.61	11	1.97	0	0	59	7.92	35	4.54	33	4.63	35	7.31	26	2.91	51	6.02	43	4.85
8932	methyl-CpG binding domain protein 2	441	58.1	730	85.91	1071	127.04	587	73.64	1293	130.39	832	96.87	382	68.45	1021	106.88	803	107.76	595	77.24	826	115.99	524	109.46	747	83.75	739	87.17	933	105.14
27151	C3 and PZP-like, alpha-2-macroglobulin domain containing 8	11	1.45	4	0.47	4	0.47	9	1.13	0	0	7	0.82	8	1.43	32	3.35	25	3.35	8	1.04	37	5.2	13	2.72	5	0.56	2	0.24	16	1.8
51802	amiloride-sensitive cation channel 5, intestinal	2	0.26	0	0	0	0	0	0	2	0.2	0	0	0	0	0	0	0	0	0	0	0	0	0	0	0	0	0	0	0	0
147700	kinesin light chain 3	2	0.26	2	0.24	2	0.24	0	0	0	0	0	0	0	0	0	0	0	0	12	1.56	9	1.26	0	0	0	0	6	0.71	0	0
2290	forkhead box G1	0	0	0	0	0	0	4	0.5	2	0.2	0	0	0	0	0	0	0	0	0	0	0	0	0	0	0	0	0	0	0	0
23125	calmodulin binding transcription activator 2	99	13.04	208	24.48	221	26.21	379	47.55	201	20.27	166	19.33	167	29.92	267	27.95	200	26.84	151	19.6	231	32.44	130	27.16	235	26.35	208	24.53	187	21.07
151011	septin 10	3	0.4	5	0.59	6	0.71	3	0.38	8	0.81	9	1.05	4	0.72	4	0.42	3	0.4	2	0.26	8	1.12	4	0.84	9	1.01	19	2.24	11	1.24
116238	TLC domain containing 1	0	0	0	0	0	0	0	0	0	0	0	0	0	0	0	0	0	0	0	0	0	0	0	0	0	0	2	0.24	0	0
84058	WD repeat domain 54	16	2.11	17	2	16	1.9	24	3.01	93	9.38	25	2.91	7	1.25	233	24.39	35	4.7	34	4.41	20	2.81	23	4.8	20	2.24	38	4.48	22	2.48
80055	post-GPI attachment to proteins 1	23	3.03	2	0.24	5	0.59	17	2.13	34	3.43	11	1.28	6	1.08	4	0.42	13	1.74	18	2.34	10	1.4	10	2.09	13	1.46	23	2.71	28	3.16
7390	uroporphyrinogen III synthase	39	5.14	26	3.06	48	5.69	112	14.05	85	8.57	49	5.71	23	4.12	156	16.33	63	8.45	29	3.76	29	4.07	42	8.77	59	6.61	50	5.9	42	4.73
2232	ferredoxin reductase	23	3.03	44	5.18	26	3.08	14	1.76	7	0.71	38	4.42	24	4.3	41	4.29	18	2.42	22	2.86	31	4.35	7	1.46	40	4.48	31	3.66	34	3.83
4815	ninjurin 2	2	0.26	124	14.59	127	15.06	0	0	139	14.02	105	12.23	59	10.57	139	14.55	83	11.14	61	7.92	69	9.69	51	10.65	84	9.42	87	10.26	71	8
128338	transmembrane protein 77	270	35.57	302	35.54	385	45.67	437	54.82	92	9.28	350	40.75	209	37.45	154	16.12	326	43.75	257	33.36	239	33.56	178	37.18	457	51.24	354	41.76	506	57.02
79966	stearoyl-CoA desaturase 5	50	6.59	20	2.35	26	3.08	10	1.25	27	2.72	13	1.51	8	1.43	37	3.87	35	4.7	23	2.99	36	5.06	26	5.43	32	3.59	17	2.01	60	6.76
170591	S100 calcium binding protein Z	37	4.87	46	5.41	69	8.18	102	12.8	0	0	90	10.48	27	4.84	0	0	56	7.51	54	7.01	54	7.58	46	9.61	67	7.51	45	5.31	46	5.18
51280	golgi membrane protein 1	47	6.19	104	12.24	61	7.24	28	3.51	9	0.91	81	9.43	30	5.38	28	2.93	208	27.91	174	22.59	167	23.45	160	33.42	147	16.48	97	11.44	89	10.03
65059	Ras association (RalGDS/AF-6) and pleckstrin homology domains 1	32	4.22	6	0.71	2	0.24	6	0.75	15	1.51	13	1.51	6	1.08	9	0.94	12	1.61	19	2.47	28	3.93	9	1.88	25	2.8	12	1.42	38	4.28
10672	guanine nucleotide binding protein (G protein), alpha 13	235	30.96	668	78.61	611	72.48	387	48.55	671	67.66	749	87.21	405	72.57	429	44.91	889	119.3	578	75.03	678	95.21	409	85.44	948	106.28	859	101.32	560	63.11
7566	zinc finger protein 18	32	4.22	58	6.83	75	8.9	35	4.39	150	15.13	71	8.27	37	6.63	110	11.52	122	16.37	65	8.44	84	11.8	60	12.53	103	11.55	108	12.74	95	10.71
728642	cell division cycle 2-like 2 (PITSLRE proteins)	555	73.11	1587	186.77	1374	162.98	450	56.45	16	1.61	1542	179.54	563	100.88	8	0.84	1080	144.93	761	98.79	868	121.89	536	111.97	2024	226.92	1389	163.84	1129	127.23
23417	malonyl-CoA decarboxylase	91	11.99	45	5.3	80	9.49	150	18.82	106	10.69	68	7.92	42	7.53	194	20.31	95	12.75	67	8.7	76	10.67	52	10.86	83	9.31	83	9.79	72	8.11
9709	homocysteine-inducible, endoplasmic reticulum stress-inducible, ubiquitin-like domain member 1	232	30.56	495	58.25	427	50.65	136	17.06	314	31.66	601	69.97	251	44.98	454	47.53	870	116.75	658	85.42	568	79.76	521	108.83	597	66.93	618	72.89	502	56.57
1431	citrate synthase	217	28.59	566	66.61	456	54.09	265	33.25	203	20.47	922	107.35	490	87.8	383	40.09	1151	154.46	832	108.01	935	131.3	722	150.82	809	90.7	799	94.24	978	110.21
64779	methenyltetrahydrofolate synthetase domain containing	16	2.11	25	2.94	18	2.14	22	2.76	55	5.55	35	4.08	21	3.76	65	6.8	31	4.16	33	4.28	18	2.53	14	2.92	37	4.15	40	4.72	22	2.48
388389	coiled-coil domain containing 103	5	0.66	7	0.82	7	0.83	31	3.89	0	0	8	0.93	5	0.9	0	0	8	1.07	3	0.39	0	0	2	0.42	0	0	8	0.94	17	1.92
23181	DIP2 disco-interacting protein 2 homolog A (Drosophila)	28	3.69	58	6.83	30	3.56	92	11.54	50	5.04	57	6.64	35	6.27	61	6.39	122	16.37	86	11.16	94	13.2	73	15.25	89	9.98	141	16.63	143	16.11
100132715	similar to splicing factor, arginine/serine-rich 3	1635	215.39	1731	203.72	1524	180.78	1577	197.84	533	53.75	2133	248.35	1333	238.86	660	69.09	3306	443.65	2031	263.66	1889	265.27	1778	371.41	2246	251.81	2165	255.37	2366	266.63
6002	regulator of G-protein signaling 12	5	0.66	2	0.24	5	0.59	5	0.63	17	1.71	7	0.82	6	1.08	84	8.79	18	2.42	8	1.04	24	3.37	19	3.97	19	2.13	14	1.65	17	1.92
100129278	hypothetical protein LOC100129278	2	0.26	0	0	0	0	0	0	0	0	0	0	0	0	0	0	0	0	0	0	0	0	0	0	0	0	0	0	0	0
100132924	similar to 23 kD highly basic protein	2	0.26	0	0	0	0	0	0	0	0	0	0	0	0	0	0	0	0	0	0	0	0	0	0	0	0	0	0	0	0
729127	hypothetical protein LOC729127	0	0	0	0	0	0	0	0	0	0	0	0	0	0	0	0	0	0	0	0	0	0	0	0	0	0	2	0.24	0	0
539	ATP synthase, H+ transporting, mitochondrial F1 complex, O subunit	223	29.38	223	26.24	334	39.62	163	20.45	839	84.61	364	42.38	169	30.28	1360	142.37	396	53.14	224	29.08	293	41.15	235	49.09	438	49.11	373	44	479	53.98
146894	CD300 molecule-like family member g	49	6.46	5	0.59	3	0.36	0	0	0	0	8	0.93	0	0	0	0	16	2.15	9	1.17	0	0	17	3.55	5	0.56	6	0.71	19	2.14
55545	msh homeobox 2 pseudogene 1	17	2.24	12	1.41	9	1.07	5	0.63	6	0.61	18	2.1	10	1.79	4	0.42	11	1.48	12	1.56	15	2.11	4	0.84	20	2.24	15	1.77	26	2.93
400931	FLJ27365 protein	0	0	0	0	0	0	0	0	7	0.71	0	0	0	0	7	0.73	5	0.67	2	0.26	2	0.28	0	0	0	0	8	0.94	3	0.34
79586	chondroitin polymerizing factor	12	1.58	7	0.82	6	0.71	17	2.13	12	1.21	8	0.93	2	0.36	7	0.73	18	2.42	9	1.17	7	0.98	8	1.67	18	2.02	15	1.77	8	0.9
55627	sphingomyelin phosphodiesterase 4, neutral membrane (neutral sphingomyelinase-3)	0	0	0	0	0	0	0	0	0	0	0	0	0	0	9	0.94	2	0.27	0	0	2	0.28	0	0	0	0	3	0.35	0	0
3067	histidine decarboxylase	115	15.15	116	13.65	134	15.89	41	5.14	123	12.4	449	52.28	267	47.84	139	14.55	100	13.42	121	15.71	58	8.14	45	9.4	387	43.39	294	34.68	190	21.41
885	cholecystokinin	0	0	0	0	0	0	0	0	0	0	0	0	0	0	0	0	0	0	2	0.26	0	0	0	0	0	0	0	0	0	0
650465	similar to Short transient receptor potential channel 2 (TrpC2) (mTrp2)	0	0	0	0	0	0	0	0	0	0	0	0	0	0	0	0	0	0	0	0	0	0	0	0	0	0	0	0	6	0.68
92283	zinc finger protein 461	11	1.45	12	1.41	11	1.3	105	13.17	8	0.81	21	2.45	12	2.15	5	0.52	51	6.84	26	3.38	38	5.34	29	6.06	37	4.15	34	4.01	23	2.59
135112	nuclear receptor coactivator 7	109	14.36	98	11.53	120	14.23	149	18.69	263	26.52	139	16.18	58	10.39	156	16.33	162	21.74	104	13.5	124	17.41	86	17.96	129	14.46	135	15.92	104	11.72
286	ankyrin 1, erythrocytic	23	3.03	42	4.94	14	1.66	31	3.89	30	3.03	35	4.08	6	1.08	34	3.56	55	7.38	145	18.82	32	4.49	17	3.55	104	11.66	91	10.73	41	4.62
54550	N-terminal EF-hand calcium binding protein 2	3	0.4	40	4.71	48	5.69	19	2.38	16	1.61	45	5.24	26	4.66	12	1.26	28	3.76	26	3.38	57	8	14	2.92	28	3.14	17	2.01	40	4.51
57337	SUMO1/sentrin specific peptidase 7	241	31.75	544	64.02	557	66.07	286	35.88	121	12.2	425	49.48	214	38.35	161	16.85	375	50.32	272	35.31	299	41.99	201	41.99	523	58.64	399	47.06	510	57.47
60673	chromosome 12 open reading frame 44	28	3.69	26	3.06	26	3.08	62	7.78	60	6.05	22	2.56	27	4.84	193	20.2	65	8.72	37	4.8	48	6.74	26	5.43	38	4.26	69	8.14	47	5.3
116159	cysteine/tyrosine-rich 1	13	1.71	30	3.53	27	3.2	26	3.26	13	1.31	11	1.28	12	2.15	10	1.05	9	1.21	0	0	0	0	0	0	4	0.45	0	0	6	0.68
4035	low density lipoprotein-related protein 1 (alpha-2-macroglobulin receptor)	0	0	0	0	0	0	0	0	18	1.82	0	0	0	0	0	0	6	0.81	6	0.78	6	0.84	2	0.42	0	0	0	0	2	0.23
256471	major facilitator superfamily domain containing 8	31	4.08	41	4.83	55	6.52	61	7.65	21	2.12	65	7.57	42	7.53	25	2.62	78	10.47	38	4.93	82	11.52	46	9.61	55	6.17	86	10.14	87	9.8
9474	ATG5 autophagy related 5 homolog (S. cerevisiae)	159	20.95	104	12.24	149	17.67	466	58.46	121	12.2	165	19.21	70	12.54	105	10.99	209	28.05	142	18.43	171	24.01	127	26.53	122	13.68	121	14.27	197	22.2
79018	chromosome 17 open reading frame 39	15	1.98	52	6.12	47	5.58	17	2.13	28	2.82	52	6.05	43	7.71	46	4.82	38	5.1	62	8.05	39	5.48	29	6.06	73	8.18	52	6.13	64	7.21
54059	chromosome 21 open reading frame 57	20	2.63	15	1.77	28	3.32	76	9.53	44	4.44	10	1.16	9	1.61	45	4.71	13	1.74	7	0.91	3	0.42	5	1.04	10	1.12	29	3.42	11	1.24
26298	ets homologous factor	0	0	0	0	0	0	3	0.38	0	0	0	0	0	0	0	0	0	0	0	0	0	0	0	0	0	0	0	0	3	0.34
387707	coiled-coil and C2 domain containing 2B	17	2.24	5	0.59	5	0.59	28	3.51	0	0	13	1.51	9	1.61	11	1.15	12	1.61	5	0.65	7	0.98	6	1.25	5	0.56	17	2.01	3	0.34
7295	thioredoxin	568	74.83	1488	175.12	2101	249.22	568	71.26	1467	147.93	1834	213.53	1235	221.3	634	66.37	965	129.5	906	117.62	986	138.46	709	148.1	1133	127.03	1134	133.76	971	109.42
6610	sphingomyelin phosphodiesterase 2, neutral membrane (neutral sphingomyelinase)	25	3.29	52	6.12	64	7.59	18	2.26	31	3.13	40	4.66	34	6.09	41	4.29	30	4.03	37	4.8	35	4.91	28	5.85	79	8.86	36	4.25	29	3.27
318	nudix (nucleoside diphosphate linked moiety X)-type motif 2	41	5.4	46	5.41	55	6.52	59	7.4	95	9.58	73	8.5	43	7.71	162	16.96	99	13.29	82	10.65	55	7.72	50	10.44	58	6.5	65	7.67	67	7.55
79738	Bardet-Biedl syndrome 10	44	5.8	69	8.12	87	10.32	77	9.66	3	0.3	50	5.82	44	7.88	3	0.31	54	7.25	27	3.51	27	3.79	34	7.1	58	6.5	38	4.48	82	9.24
51302	cytochrome P450, family 39, subfamily A, polypeptide 1	2	0.26	0	0	0	0	0	0	0	0	0	0	0	0	0	0	0	0	0	0	0	0	0	0	0	0	0	0	0	0
2067	excision repair cross-complementing rodent repair deficiency, complementation group 1 (includes overlapping antisense sequence)	14	1.84	24	2.82	26	3.08	39	4.89	108	10.89	39	4.54	5	0.9	134	14.03	10	1.34	9	1.17	14	1.97	13	2.72	25	2.8	20	2.36	55	6.2
65988	zinc finger protein 747	3	0.4	0	0	0	0	0	0	15	1.51	0	0	2	0.36	31	3.25	0	0	0	0	0	0	3	0.63	3	0.34	2	0.24	0	0
649917	similar to zinc finger, DHHC-type containing 11	2	0.26	5	0.59	8	0.95	2	0.25	8	0.81	5	0.58	0	0	6	0.63	0	0	0	0	2	0.28	0	0	10	1.12	6	0.71	2	0.23
5925	retinoblastoma 1	193	25.43	202	23.77	265	31.43	395	49.55	404	40.74	210	24.45	210	37.63	343	35.91	313	42	235	30.51	287	40.3	182	38.02	273	30.61	302	35.62	293	33.02
166012	carbohydrate (chondroitin 4) sulfotransferase 13	12	1.58	17	2	11	1.3	50	6.27	17	1.71	21	2.45	9	1.61	6	0.63	44	5.9	22	2.86	74	10.39	44	9.19	27	3.03	6	0.71	0	0
9467	SH3-domain binding protein 5 (BTK-associated)	397	52.3	405	47.66	523	62.04	1073	134.61	153	15.43	518	60.31	321	57.52	115	12.04	518	69.51	411	53.36	423	59.4	283	59.12	527	59.08	428	50.48	446	50.26
144817	hypothetical protein LOC144817	0	0	0	0	0	0	0	0	0	0	0	0	0	0	0	0	2	0.27	0	0	0	0	0	0	0	0	0	0	0	0
727888	hypothetical LOC727888	0	0	0	0	0	0	0	0	3	0.3	0	0	0	0	0	0	0	0	0	0	0	0	0	0	0	0	3	0.35	0	0
283463	mucin 19, oligomeric	0	0	0	0	0	0	0	0	0	0	0	0	0	0	0	0	0	0	0	0	2	0.28	0	0	0	0	0	0	0	0
168374	zinc finger protein 92	85	11.2	86	10.12	66	7.83	79	9.91	75	7.56	70	8.15	40	7.17	123	12.88	74	9.93	77	10	70	9.83	50	10.44	157	17.6	84	9.91	89	10.03
645291	hypothetical LOC645291	0	0	5	0.59	2	0.24	0	0	0	0	4	0.47	0	0	0	0	0	0	0	0	0	0	2	0.42	0	0	2	0.24	9	1.01
134553	chromosome 5 open reading frame 24	8	1.05	10	1.18	5	0.59	10	1.25	0	0	9	1.05	13	2.33	9	0.94	64	8.59	42	5.45	39	5.48	15	3.13	13	1.46	30	3.54	14	1.58
55246	coiled-coil domain containing 25	60	7.9	66	7.77	39	4.63	43	5.39	194	19.56	115	13.39	34	6.09	487	50.98	117	15.7	82	10.65	91	12.78	55	11.49	111	12.44	129	15.22	180	20.28
1954	multiple EGF-like-domains 8	35	4.61	42	4.94	18	2.14	16	2.01	10	1.01	32	3.73	16	2.87	5	0.52	34	4.56	10	1.3	23	3.23	20	4.18	42	4.71	39	4.6	41	4.62
92579	glucose 6 phosphatase, catalytic, 3	30	3.95	28	3.3	21	2.49	7	0.88	22	2.22	45	5.24	21	3.76	33	3.45	33	4.43	24	3.12	33	4.63	29	6.06	53	5.94	23	2.71	38	4.28
344967	acyl-CoA thioesterase 7-like	109	14.36	10	1.18	10	1.19	61	7.65	220	22.19	13	1.51	3	0.54	178	18.63	13	1.74	8	1.04	6	0.84	29	6.06	9	1.01	13	1.53	33	3.72
8822	fibroblast growth factor 17	0	0	0	0	0	0	0	0	0	0	0	0	0	0	8	0.84	0	0	0	0	0	0	0	0	0	0	0	0	0	0
55218	exonuclease 3'-5' domain-like 2	35	4.61	23	2.71	29	3.44	24	3.01	8	0.81	31	3.61	13	2.33	22	2.3	49	6.58	25	3.25	21	2.95	11	2.3	40	4.48	24	2.83	30	3.38
2498	ferritin, heavy polypeptide-like 3 pseudogene	5	0.66	11	1.29	6	0.71	8	1	0	0	27	3.14	12	2.15	0	0	20	2.68	11	1.43	15	2.11	24	5.01	14	1.57	17	2.01	22	2.48
100128076	similar to protein tyrosine phosphatase	0	0	0	0	0	0	0	0	9	0.91	0	0	0	0	0	0	0	0	0	0	0	0	0	0	0	0	0	0	0	0
55798	methyltransferase like 2B	11	1.45	5	0.59	11	1.3	3	0.38	62	6.25	13	1.51	7	1.25	68	7.12	5	0.67	4	0.52	5	0.7	2	0.42	4	0.45	8	0.94	10	1.13
55850	unconventional SNARE in the ER 1 homolog (S. cerevisiae)	47	6.19	82	9.65	67	7.95	21	2.63	138	13.92	99	11.53	42	7.53	190	19.89	76	10.2	50	6.49	44	6.18	34	7.1	122	13.68	94	11.09	98	11.04
56997	chaperone, ABC1 activity of bc1 complex homolog (S. pombe)	45	5.93	75	8.83	68	8.07	40	5.02	68	6.86	117	13.62	49	8.78	114	11.93	116	15.57	53	6.88	54	7.58	30	6.27	120	13.45	64	7.55	75	8.45
5471	phosphoribosyl pyrophosphate amidotransferase	19	2.5	4	0.47	13	1.54	29	3.64	8	0.81	8	0.93	5	0.9	11	1.15	15	2.01	9	1.17	22	3.09	18	3.76	21	2.35	21	2.48	24	2.7
79731	asparaginyl-tRNA synthetase 2, mitochondrial (putative)	8	1.05	5	0.59	5	0.59	5	0.63	24	2.42	13	1.51	9	1.61	38	3.98	22	2.95	14	1.82	7	0.98	7	1.46	14	1.57	22	2.59	19	2.14
55034	molybdenum cofactor sulfurase	3	0.4	0	0	2	0.24	0	0	0	0	0	0	0	0	0	0	0	0	3	0.39	0	0	0	0	2	0.22	0	0	0	0
127255	leucine-rich repeats and IQ motif containing 3	0	0	0	0	0	0	0	0	0	0	2	0.23	0	0	0	0	7	0.94	2	0.26	4	0.56	0	0	0	0	2	0.24	0	0
100133154	hypothetical protein LOC100133154	0	0	0	0	5	0.59	6	0.75	0	0	3	0.35	0	0	0	0	0	0	2	0.26	0	0	3	0.63	3	0.34	0	0	2	0.23
[truncated: 15,368 more rows]
